# Supplementary material for: Re-Adaption on Earth after Spaceflights Affects the Mouse Liver Proteome
Source: Int J Mol Sci. 2017 Aug 12;18(8):1763. doi: 10.3390/ijms18081763 (PMC5578152; doi:10.3390/ijms18081763)
Supplement: Supplementary file 1 [file ijms-18-01763-s001.zip]

Archive with 7 entries (7 files):
- Table S5.xlsx
- Figure S1.pdf
- Supplementary Overview.pdf
- Table S1.xlsx
- Table S2.xlsx
- Table S3.xlsx
- Table S4.xlsx
