# Supplementary material for: Re-Adaption on Earth after Spaceflights Affects the Mouse Liver Proteome
Source: Int J Mol Sci. 2017 Aug 12;18(8):1763. doi: 10.3390/ijms18081763 (PMC5578152; doi:10.3390/ijms18081763)
Supplement: Supplementary file 1 [file ijms-18-01763-s001.zip › Table S1.xlsx]

## Sheet: identified_peptides_20160916
Protein IDs	Majority protein IDs	Protein names	Gene names	GOBP name	GOMF name	GOCC name	KEGG name	Peptides	Razor + unique peptides	Unique peptides	Sequence coverage [%]	Unique + razor sequence coverage [%]	Unique sequence coverage [%]	Mol. weight [kDa]	Score	Intensity	MS/MS count	Number of proteins	Peptides f01	Peptides f02	Peptides f03	Peptides f04	Peptides k01	Peptides k02	Peptides k03	Peptides P01	Peptides P02	Peptides P03	Razor + unique peptides f01	Razor + unique peptides f02	Razor + unique peptides f03	Razor + unique peptides f04	Razor + unique peptides k01	Razor + unique peptides k02	Razor + unique peptides k03	Razor + unique peptides P01	Razor + unique peptides P02	Razor + unique peptides P03	Unique peptides f01	Unique peptides f02	Unique peptides f03	Unique peptides f04	Unique peptides k01	Unique peptides k02	Unique peptides k03	Unique peptides P01	Unique peptides P02	Unique peptides P03	Intensity f01
																			flight	flight	flight	flight	control	control	control	post-flight	post-flight	post-flight
A0A075B5P3;P01867;A0A0A6YVP0	A0A075B5P3;P01867	Ig gamma-2B chain C region	Ighg2b;Igh-3	activation of immune response;adaptive immune response;adaptive immune response based on somatic recombination of immune receptors built from immunoglobulin superfamily domains;B cell mediated immunity;biological regulation;cell recognition;cellular component organization;cellular component organization or biogenesis;cellular membrane organization;cellular process;complement activation;complement…	antigen binding;binding	cell part;extracellular region;extracellular region part;extracellular space;immunoglobulin complex;immunoglobulin complex, circulating;integral to membrane;intrinsic to membrane;macromolecular complex;membrane;membrane part;plasma membrane;protein complex		4	4	3	12.8	12.8	8	36.568	11.336	181490000	31	3	3	3	2	3	4	3	4	3	4	4	3	3	2	3	4	3	4	3	4	4	3	2	1	2	3	2	3	2	3	3	9973200
A0A087WPL5;E9QNN1;O70133;Q3UR42	A0A087WPL5;E9QNN1;O70133;Q3UR42	ATP-dependent RNA helicase A	Dhx9	biological regulation;cell differentiation;cellular developmental process;cellular macromolecule metabolic process;cellular metabolic process;cellular nitrogen compound metabolic process;cellular process;cellular response to heat;cellular response to stimulus;cellular response to stress;circadian rhythm;CRD-mediated mRNA stabilization;developmental process;macromolecule metabolic process;metaboli…	adenyl nucleotide binding;adenyl ribonucleotide binding;ATP binding;ATPase activity;ATPase activity, coupled;ATP-dependent helicase activity;ATP-dependent RNA helicase activity;binding;catalytic activity;DNA binding;helicase activity;hydrolase activity;hydrolase activity, acting on acid anhydrides;hydrolase activity, acting on acid anhydrides, in phosphorus-containing anhydrides;nucleic acid bind…	cell part;centrosome;CRD-mediated mRNA stability complex;cytoplasm;cytoplasmic part;cytoskeletal part;intracellular membrane-bounded organelle;intracellular non-membrane-bounded organelle;intracellular organelle;intracellular organelle part;intracellular part;macromolecular complex;membrane;membrane-bounded organelle;microtubule organizing center;non-membrane-bounded organelle;nuclear part;nucleo…		4	4	4	3	3	3	149.62	5.7759	95730000	16	4	3	2	0	2	3	1	1	3	3	3	3	2	0	2	3	1	1	3	3	3	3	2	0	2	3	1	1	3	3	3	14959000
B7ZNJ1;A0A087WS56;B9EHT6;A0A087WSN6;Q3UHL6;A0A087WR50;P11276;A0A087WS99;Q4KL80	B7ZNJ1;A0A087WS56;B9EHT6;A0A087WSN6;Q3UHL6;A0A087WR50;P11276	Fibronectin;Anastellin	Fn1	acute inflammatory response;acute-phase response;anatomical structure formation involved in morphogenesis;anatomical structure morphogenesis;angiogenesis;biological adhesion;biological regulation;calcium-independent cell-matrix adhesion;cell adhesion;cell differentiation;cell junction assembly;cell junction organization;cell morphogenesis;cell morphogenesis involved in differentiation;cell-matrix…	binding;carbohydrate binding;enzyme activator activity;enzyme binding;enzyme regulator activity;glycosaminoglycan binding;heparin binding;integrin binding;pattern binding;peptidase activator activity;peptidase regulator activity;polysaccharide binding;protease binding;protein binding;protein complex binding;receptor binding	apical plasma membrane;basal lamina;basement membrane;blood microparticle;cell part;cytoplasmic part;endoplasmic reticulum-Golgi intermediate compartment;extracellular matrix;extracellular matrix part;extracellular membrane-bounded organelle;extracellular organelle;extracellular region part;extracellular space;extracellular vesicular exosome;fibrinogen complex;intracellular membrane-bounded organ…	Amoebiasis;Bacterial invasion of epithelial cells;ECM-receptor interaction;Focal adhesion;Pathways in cancer;Regulation of actin cytoskeleton;Small cell lung cancer	19	19	19	11	11	11	239.72	44.35	677500000	113	9	7	9	9	7	11	11	7	8	15	8	7	9	9	7	11	11	7	8	15	8	7	9	9	7	11	11	7	8	15	8	66908000
A0A087WRE7;Q8R0N6	A0A087WRE7;Q8R0N6	Hydroxyacid-oxoacid transhydrogenase, mitochondrial	Adhfe1	establishment of localization;hydrogen transport;molecular hydrogen transport;transport	binding;catalytic activity;cation binding;hydroxyacid-oxoacid transhydrogenase activity;ion binding;metal ion binding;oxidoreductase activity;oxidoreductase activity, acting on CH-OH group of donors	cell part;cytoplasmic part;intracellular membrane-bounded organelle;intracellular organelle;intracellular part;membrane-bounded organelle;mitochondrion;organelle		4	4	4	9.8	9.8	9.8	49.039	7.0157	153010000	23	2	1	2	1	1	2	0	2	4	2	2	1	2	1	1	2	0	2	4	2	2	1	2	1	1	2	0	2	4	2	2	4359400
J3QQ16;A0A087WS16;E9PWQ3;D3YWD1	J3QQ16;A0A087WS16;E9PWQ3;D3YWD1		Col6a3		endopeptidase inhibitor activity;endopeptidase regulator activity;enzyme inhibitor activity;enzyme regulator activity;peptidase inhibitor activity;peptidase regulator activity;serine-type endopeptidase inhibitor activity	cell part;collagen;extracellular matrix;extracellular matrix part;extracellular membrane-bounded organelle;extracellular organelle;extracellular region part;extracellular space;extracellular vesicular exosome;membrane;membrane-bounded organelle;membrane-bounded vesicle;organelle;plasma membrane;proteinaceous extracellular matrix;sarcolemma;vesicle	ECM-receptor interaction;Focal adhesion;Protein digestion and absorption	61	61	61	30.4	30.4	30.4	288.69	323.31	4229600000	1062	4	49	33	44	25	54	49	47	16	22	19	49	33	44	25	54	49	47	16	22	19	49	33	44	25	54	49	47	16	22	19	641540000
A0A087WS46;O70251;M0QWK5;M0QWH8;G3UX43;G3UZ47	A0A087WS46;O70251	Elongation factor 1-beta	Eef1b2;Eef1b	biosynthetic process;cellular biosynthetic process;cellular macromolecule biosynthetic process;cellular macromolecule metabolic process;cellular metabolic process;cellular process;macromolecule biosynthetic process;macromolecule metabolic process;metabolic process;translational elongation	binding;nucleic acid binding;RNA binding;translation elongation factor activity;translation factor activity, nucleic acid binding	cell part;cytoplasm;cytoplasmic part;eukaryotic translation elongation factor 1 complex;intracellular part;macromolecular complex;protein complex		4	4	4	33.2	33.2	33.2	20.136	83.034	320560000	60	6	2	3	1	3	2	3	2	3	3	4	2	3	1	3	2	3	2	3	3	4	2	3	1	3	2	3	2	3	3	4	9481500
A0A0A0MQ68;Q60759;D3Z4I2	A0A0A0MQ68;Q60759	Glutaryl-CoA dehydrogenase, mitochondrial	Gcdh	acyl-CoA biosynthetic process;acyl-CoA metabolic process;amine metabolic process;aromatic amino acid family metabolic process;biosynthetic process;carboxylic acid metabolic process;cellular amine metabolic process;cellular amino acid metabolic process;cellular aromatic compound metabolic process;cellular biogenic amine metabolic process;cellular biosynthetic process;cellular ketone metabolic proc…	acyl-CoA dehydrogenase activity;binding;carboxylic acid binding;catalytic activity;coenzyme binding;cofactor binding;fatty acid binding;fatty-acyl-CoA binding;flavin adenine dinucleotide binding;glutaryl-CoA dehydrogenase activity;lipid binding;monocarboxylic acid binding;oxidoreductase activity;oxidoreductase activity, acting on the CH-CH group of donors	cell part;cytoplasmic part;intracellular membrane-bounded organelle;intracellular organelle;intracellular organelle lumen;intracellular organelle part;intracellular part;membrane;membrane-bounded organelle;membrane-enclosed lumen;mitochondrial inner membrane;mitochondrial matrix;mitochondrial membrane;mitochondrial part;mitochondrion;organelle;organelle inner membrane;organelle lumen;organelle me…	Benzoate degradation;Fatty acid metabolism;Lysine degradation;Tryptophan metabolism	14	14	14	50.3	50.3	50.3	49.57	306.27	3049000000	528	3	11	11	10	9	11	10	9	13	12	13	11	11	10	9	11	10	9	13	12	13	11	11	10	9	11	10	9	13	12	13	168110000
A0A0A0MQA5;P68368;A0A087WQS4;A0A087WRB4;A0A087WSB0;A0A087WSL5	A0A0A0MQA5;P68368	Tubulin alpha-4A chain	Tuba4a	cellular component assembly;cellular component assembly at cellular level;cellular component organization;cellular component organization at cellular level;cellular component organization or biogenesis;cellular component organization or biogenesis at cellular level;cellular macromolecular complex assembly;cellular macromolecular complex subunit organization;cellular process;cellular protein compl…	binding;catalytic activity;GTP binding;GTPase activity;guanyl nucleotide binding;guanyl ribonucleotide binding;hydrolase activity;hydrolase activity, acting on acid anhydrides;hydrolase activity, acting on acid anhydrides, in phosphorus-containing anhydrides;nucleoside-triphosphatase activity;nucleotide binding;purine nucleotide binding;purine ribonucleoside triphosphate binding;purine ribonucleo…	cell part;cytoplasm;cytoskeletal part;extracellular membrane-bounded organelle;extracellular organelle;extracellular region part;extracellular vesicular exosome;intracellular organelle part;intracellular part;macromolecular complex;membrane-bounded organelle;membrane-bounded vesicle;microtubule;organelle;organelle part;protein complex;vesicle	Gap junction;Pathogenic Escherichia coli infection;Phagosome	16	3	3	41.9	7.1	7.1	52.793	32.101	524550000	144	6	15	15	15	14	14	14	12	14	14	16	3	3	3	3	3	3	3	3	3	3	3	3	3	3	3	3	3	3	3	3	57879000
D2KHZ9;A0A0A0MQF6;P16858;S4R1W1;S4R257;D3YYI5;S4R1W8;S4R1N5;V9GX06;A0A0R4J0X7;S4R2G5;Q64467;V9GXA7	D2KHZ9;A0A0A0MQF6;P16858;S4R1W1;S4R257;D3YYI5	Glyceraldehyde-3-phosphate dehydrogenase	GAPDH;Gapdh;Gm3839;Gm7293	alcohol catabolic process;alcohol metabolic process;apoptosis;biological regulation;carbohydrate catabolic process;carbohydrate metabolic process;catabolic process;cell death;cell motility;cellular carbohydrate catabolic process;cellular carbohydrate metabolic process;cellular component movement;cellular component organization;cellular component organization at cellular level;cellular component o…	binding;catalytic activity;coenzyme binding;cofactor binding;cytoskeletal protein binding;enzyme binding;glyceraldehyde-3-phosphate dehydrogenase (NAD+) (phosphorylating) activity;microtubule binding;NAD binding;NADP binding;nucleotide binding;oxidoreductase activity;oxidoreductase activity, acting on the aldehyde or oxo group of donors;oxidoreductase activity, acting on the aldehyde or oxo group…	cell part;cell projection;cell projection part;cilium;cytoplasm;cytoplasmic part;cytoskeleton;cytosol;flagellar fibrous sheath;flagellum part;intracellular membrane-bounded organelle;intracellular non-membrane-bounded organelle;intracellular organelle;intracellular organelle part;intracellular part;membrane-bounded organelle;microtubule cytoskeleton;microtubule-based flagellum part;motile cilium;…	Alzheimer's disease;Glycolysis / Gluconeogenesis	18	18	18	63.1	63.1	63.1	35.81	323.31	9664700000	1483	13	10	14	13	14	12	10	8	18	17	16	10	14	13	14	12	10	8	18	17	16	10	14	13	14	12	10	8	18	17	16	601740000
A0A0A0MQG2;Q62261	A0A0A0MQG2;Q62261	Spectrin beta chain, non-erythrocytic 1	Sptbn1	actin filament capping;biological regulation;cell cycle cytokinesis;cell cycle process;cellular component assembly;cellular component assembly at cellular level;cellular component organization;cellular component organization at cellular level;cellular component organization or biogenesis;cellular component organization or biogenesis at cellular level;cellular macromolecule metabolic process;cellu…	ankyrin binding;binding;cytoskeletal protein binding;lipid binding;phospholipid binding;protein binding;structural constituent of cytoskeleton;structural molecule activity	axolemma;axon part;cell cortex part;cell part;cell projection membrane;cell projection part;contractile fiber part;cortical cytoskeleton;cuticular plate;cytoplasm;cytoplasmic part;cytoskeletal part;cytoskeleton;extracellular membrane-bounded organelle;extracellular organelle;extracellular region part;extracellular vesicular exosome;intracellular membrane-bounded organelle;intracellular non-membra…		14	14	11	6.8	6.8	5.3	244.25	46.085	395370000	42	2	2	3	3	2	4	7	6	10	5	9	2	3	3	2	4	7	6	10	5	9	2	3	3	2	4	6	6	7	3	7	51913000
A0A0A6YWC8;Q5FWJ3;P20152;G5E846;G3X981;P15331;A2AKJ2;D3YZ35	A0A0A6YWC8;Q5FWJ3;P20152	Vimentin	Vim	anatomical structure development;astrocyte development;astrocyte differentiation;axon cargo transport;Bergmann glial cell differentiation;biological regulation;cell development;cell differentiation;cellular component assembly;cellular component assembly at cellular level;cellular component movement;cellular component organization;cellular component organization at cellular level;cellular componen…	binding;double-stranded RNA binding;glycoprotein binding;identical protein binding;nucleic acid binding;protein binding;protein C-terminus binding;RNA binding;scaffold protein binding;structural constituent of cytoskeleton;structural constituent of eye lens;structural molecule activity	adherens junction;anchoring junction;axon;axon part;cell body;cell junction;cell leading edge;cell part;cell projection;cell projection part;cell-substrate adherens junction;cell-substrate junction;C-fiber;cilium;cilium part;cytoplasm;cytoplasmic part;cytoskeletal part;cytoskeleton;cytosol;extracellular membrane-bounded organelle;extracellular organelle;extracellular region part;extracellular ves…	Amyotrophic lateral sclerosis (ALS)	18	15	13	34.2	30.4	26.2	49.192	119.6	844530000	143	8	7	9	11	12	14	12	14	14	10	14	5	6	8	9	11	9	11	11	7	12	4	5	6	7	9	8	9	9	6	10	15794000
Q5M9K9;A0A0A6YX26;P62900;A0A0A6YXL3	Q5M9K9;A0A0A6YX26;P62900;A0A0A6YXL3	60S ribosomal protein L31	Rpl31	biosynthetic process;cellular biosynthetic process;cellular macromolecule biosynthetic process;cellular macromolecule metabolic process;cellular metabolic process;cellular process;cellular protein metabolic process;macromolecule biosynthetic process;macromolecule metabolic process;metabolic process;primary metabolic process;protein metabolic process;translation	structural constituent of ribosome;structural molecule activity	adherens junction;anchoring junction;cell junction;cell part;cell-substrate adherens junction;cell-substrate junction;cytosolic large ribosomal subunit;extracellular membrane-bounded organelle;extracellular organelle;extracellular region part;extracellular vesicular exosome;focal adhesion;intracellular organelle part;intracellular part;large ribosomal subunit;macromolecular complex;membrane;membr…	Ribosome	4	4	4	31.2	31.2	31.2	14.463	12.136	1694100000	228	4	4	4	3	3	4	4	4	4	4	3	4	4	3	3	4	4	4	4	4	3	4	4	3	3	4	4	4	4	4	3	123750000
A0A0G2JES3;Q5EBQ6;A0A140T8T4;P51410;D3Z629;A0A0G2JFQ3;D3YZT0;S4R1R7	A0A0G2JES3;Q5EBQ6;A0A140T8T4;P51410;D3Z629	60S ribosomal protein L9	Rpl9	biosynthetic process;cellular biosynthetic process;cellular macromolecule biosynthetic process;cellular macromolecule metabolic process;cellular metabolic process;cellular process;cellular protein metabolic process;macromolecule biosynthetic process;macromolecule metabolic process;metabolic process;primary metabolic process;protein metabolic process;translation	binding;nucleic acid binding;RNA binding;rRNA binding;structural constituent of ribosome;structural molecule activity	adherens junction;anchoring junction;cell junction;cell part;cell-substrate adherens junction;cell-substrate junction;cytoplasm;cytosolic large ribosomal subunit;focal adhesion;intracellular membrane-bounded organelle;intracellular non-membrane-bounded organelle;intracellular organelle;intracellular organelle part;intracellular part;large ribosomal subunit;macromolecular complex;membrane;membrane…	Ribosome	7	7	7	37.2	37.2	37.2	21.622	54.105	1100100000	146	8	2	5	5	5	5	4	3	5	6	5	2	5	5	5	5	4	3	5	6	5	2	5	5	5	5	4	3	5	6	5	104770000
A0A0J9YU79;E9Q1Q9;P97328;A0A0J9YUK6;A0A0J9YTU1	A0A0J9YU79;E9Q1Q9;P97328;A0A0J9YUK6;A0A0J9YTU1	Ketohexokinase	Khk	alcohol metabolic process;biological regulation;carbohydrate metabolic process;carbohydrate phosphorylation;cellular carbohydrate metabolic process;cellular metabolic process;cellular process;fructose metabolic process;hexose metabolic process;metabolic process;monosaccharide metabolic process;phosphate-containing compound metabolic process;phosphorus metabolic process;phosphorylation;primary met…	adenyl nucleotide binding;adenyl ribonucleotide binding;ATP binding;binding;carbohydrate kinase activity;catalytic activity;ketohexokinase activity;kinase activity;nucleotide binding;phosphotransferase activity, alcohol group as acceptor;purine nucleotide binding;purine ribonucleoside triphosphate binding;purine ribonucleotide binding;ribonucleotide binding;transferase activity;transferase activi…	cell part;cytoplasm;extracellular membrane-bounded organelle;extracellular organelle;extracellular region part;extracellular vesicular exosome;intracellular membrane-bounded organelle;intracellular organelle;intracellular part;membrane-bounded organelle;membrane-bounded vesicle;nucleus;organelle;vesicle	Fructose and mannose metabolism	8	8	8	38.9	38.9	38.9	32.74	75.708	794530000	179	5	5	3	3	2	6	6	5	5	4	5	5	3	3	2	6	6	5	5	4	5	5	3	3	2	6	6	5	5	4	5	52288000
A0A0J9YUI8;Q91X44;A0A0J9YVA3	A0A0J9YUI8;Q91X44	Glucokinase regulatory protein	Gckr	biological regulation;carbohydrate homeostasis;carbohydrate metabolic process;cellular chemical homeostasis;cellular glucose homeostasis;cellular homeostasis;cellular localization;cellular macromolecule localization;cellular metabolic process;cellular nitrogen compound metabolic process;cellular process;cellular protein localization;chemical homeostasis;establishment of localization;establishment…	binding;carbohydrate binding;enzyme inhibitor activity;enzyme regulator activity;fructose binding;fructose-6-phosphate binding;monosaccharide binding;sugar binding	cell part;cytoplasm;cytoplasmic part;cytosol;intracellular membrane-bounded organelle;intracellular organelle;intracellular organelle part;intracellular part;membrane-bounded organelle;mitochondrion;nuclear part;nucleoplasm;nucleus;organelle;organelle part		10	10	10	20.4	20.4	20.4	68.72	52.177	567010000	175	3	3	3	3	4	3	4	5	10	5	6	3	3	3	4	3	4	5	10	5	6	3	3	3	4	3	4	5	10	5	6	47050000
A0A0J9YUK7;Q9CRD0;A0A0J9YUB6;A0A0J9YTV6	A0A0J9YUK7;Q9CRD0;A0A0J9YUB6	OCIA domain-containing protein 1	Ociad1			cell part;cytoplasmic part;endosome;intracellular membrane-bounded organelle;intracellular organelle;intracellular part;membrane;membrane-bounded organelle;mitochondrion;organelle		5	5	5	37.5	37.5	37.5	15.268	10.763	304320000	59	4	4	3	3	3	3	5	3	2	4	2	4	3	3	3	3	5	3	2	4	2	4	3	3	3	3	5	3	2	4	2	33656000
A0A0J9YUS5;E9PVC6;E9Q9E1;E9PVC5;Q6NZJ6;A0A0J9YVC1;A0A0J9YUC1;E9Q770;A2AMI7;Z4YKC4;A0A0R4J112;A2AMI2;A0A0N4SVL0;Q80XI3	A0A0J9YUS5;E9PVC6;E9Q9E1;E9PVC5;Q6NZJ6;A0A0J9YVC1;A0A0J9YUC1;E9Q770	Eukaryotic translation initiation factor 4 gamma 1	Eif4g1	anatomical structure development;behavior;behavioral defense response;behavioral fear response;biological regulation;defense response;developmental process;fear response;gamete generation;lung development;male gamete generation;multicellular organismal process;multicellular organismal reproductive process;multicellular organismal response to stress;organ development;positive regulation of biologi…	binding;nucleic acid binding;RNA binding;translation factor activity, nucleic acid binding;translation initiation factor activity	cell part;cytoplasm;cytoplasmic part;eukaryotic translation initiation factor 4F complex;intracellular part;macromolecular complex;membrane;protein complex	RNA transport;Viral myocarditis	7	7	7	6.1	6.1	6.1	145.31	11.254	209830000	73	14	3	2	2	4	4	3	4	4	2	3	3	2	2	4	4	3	4	4	2	3	3	2	2	4	4	3	4	4	2	3	29779000
A0A0N4SUN2;Q9JJL3	A0A0N4SUN2;Q9JJL3	Solute carrier organic anion transporter family member 1B2	Slco1b2	anatomical structure development;developmental process;liver development;organ development;response to antibiotic;response to biotic stimulus;response to chemical stimulus;response to corticosteroid stimulus;response to cytokine stimulus;response to endogenous stimulus;response to glucocorticoid stimulus;response to hormone stimulus;response to lipopolysaccharide;response to molecule of bacterial…	anion transmembrane transporter activity;bile acid transmembrane transporter activity;carboxylic acid transmembrane transporter activity;drug transmembrane transporter activity;ion transmembrane transporter activity;monocarboxylic acid transmembrane transporter activity;oligopeptide transporter activity;organic acid transmembrane transporter activity;organic anion transmembrane transporter activi…	basolateral plasma membrane;cell part;integral to membrane;integral to plasma membrane;intrinsic to membrane;intrinsic to plasma membrane;membrane;membrane part;plasma membrane;plasma membrane part	Bile secretion	11	11	11	19.1	19.1	19.1	72.674	92.369	2042700000	498	2	7	10	9	7	8	8	8	8	9	9	7	10	9	7	8	8	8	8	9	9	7	10	9	7	8	8	8	8	9	9	176390000
A0A0N4SVP8;Q91VC3;A2AFK7;E9PV04;A0A0N4SVM5;D6RJ60;D6RJ11	A0A0N4SVP8;Q91VC3;A2AFK7;E9PV04	Eukaryotic initiation factor 4A-III;Eukaryotic initiation factor 4A-III, N-terminally processed	Eif4a3;Gm8994	anatomical structure morphogenesis;biological regulation;catabolic process;cellular catabolic process;cellular macromolecule catabolic process;cellular macromolecule metabolic process;cellular metabolic process;cellular nitrogen compound metabolic process;cellular process;developmental process;embryonic cranial skeleton morphogenesis;embryonic morphogenesis;embryonic organ morphogenesis;embryonic…	adenyl nucleotide binding;adenyl ribonucleotide binding;ATP binding;ATPase activity;ATPase activity, coupled;ATP-dependent helicase activity;ATP-dependent RNA helicase activity;binding;catalytic activity;helicase activity;hydrolase activity;hydrolase activity, acting on acid anhydrides;hydrolase activity, acting on acid anhydrides, in phosphorus-containing anhydrides;mRNA binding;nucleic acid bin…	catalytic step 2 spliceosome;cell part;cytoplasm;cytoplasmic part;exon-exon junction complex;intracellular non-membrane-bounded organelle;intracellular organelle;intracellular organelle part;intracellular part;macromolecular complex;membrane;non-membrane-bounded organelle;nuclear body;nuclear part;nuclear speck;nucleolus;nucleoplasm part;organelle;organelle part;perinuclear region of cytoplasm;pr…	mRNA surveillance pathway;RNA transport;Spliceosome	7	5	5	18.5	12.7	12.7	46.959	28.185	204820000	55	7	4	4	2	3	4	4	5	6	4	4	2	3	1	2	2	2	3	4	3	3	2	3	1	2	2	2	3	4	3	3	17526000
A0A0N4SVT3;A0A0N4SW28;Q9DAS9	A0A0N4SVT3;A0A0N4SW28;Q9DAS9	Guanine nucleotide-binding protein G(I)/G(S)/G(O) subunit gamma-12	Gng12	anatomical structure development;biological regulation;cell surface receptor linked signaling pathway;cellular process;cellular response to stimulus;cerebral cortex development;developmental process;G-protein coupled receptor protein signaling pathway;regulation of biological process;regulation of cellular process;response to biotic stimulus;response to chemical stimulus;response to lipopolysacch…	anion binding;binding;ion binding;molecular transducer activity;PDZ domain binding;phosphate ion binding;protein binding;protein domain specific binding;signal transducer activity	actin filament;cell part;cytoskeletal part;extracellular membrane-bounded organelle;extracellular organelle;extracellular region part;extracellular vesicular exosome;extrinsic to internal side of plasma membrane;extrinsic to membrane;extrinsic to plasma membrane;heterotrimeric G-protein complex;intracellular organelle part;intracellular part;macromolecular complex;membrane part;membrane-bounded o…	Chemokine signaling pathway;MAPK signaling pathway;Regulation of actin cytoskeleton	4	4	4	73.8	73.8	73.8	7.1971	61.491	731650000	96	3	4	4	3	4	4	4	4	3	4	4	4	4	3	4	4	4	4	3	4	4	4	4	3	4	4	4	4	3	4	4	79947000
A0A0N4SWI4;Q9CR98;A0A140T8T1	A0A0N4SWI4;Q9CR98	Protein FAM136A	Fam136a			cell part;cytoplasm;cytoplasmic part;intracellular membrane-bounded organelle;intracellular organelle;intracellular part;membrane-bounded organelle;mitochondrion;organelle		3	3	3	27.9	27.9	27.9	9.7331	4.2301	209800000	20	3	2	2	2	2	2	1	3	1	3	1	2	2	2	2	2	1	3	1	3	1	2	2	2	2	2	1	3	1	3	1	10274000
A0A0R3P9C8;Q9DC69	A0A0R3P9C8;Q9DC69	NADH dehydrogenase [ubiquinone] 1 alpha subcomplex subunit 9, mitochondrial	Ndufa9		binding;catalytic activity;NADH dehydrogenase activity;oxidoreductase activity;oxidoreductase activity, acting on NADH or NADPH;protein binding;protein complex binding	cell part;cytoplasmic part;intracellular membrane-bounded organelle;intracellular organelle;intracellular organelle lumen;intracellular organelle part;intracellular part;macromolecular complex;membrane;membrane part;membrane-bounded organelle;membrane-enclosed lumen;mitochondrial inner membrane;mitochondrial matrix;mitochondrial membrane;mitochondrial membrane part;mitochondrial part;mitochondria…	Alzheimer's disease;Huntington's disease;Oxidative phosphorylation;Parkinson's disease	19	19	19	64.9	64.9	64.9	42.121	323.31	2920000000	827	2	14	15	12	11	17	15	12	14	13	11	14	15	12	11	17	15	12	14	13	11	14	15	12	11	17	15	12	14	13	11	297810000
A0A0R4IZY2;Q8CIM7;Q6P8N9	A0A0R4IZY2;Q8CIM7	Cytochrome P450 2D26	Cyp2d26	anatomical structure development;arachidonic acid metabolic process;carboxylic acid metabolic process;catabolic process;cellular catabolic process;cellular ketone metabolic process;cellular lipid metabolic process;cellular metabolic process;cellular process;developmental process;drug catabolic process;drug metabolic process;exogenous drug catabolic process;fatty acid metabolic process;female preg…	arachidonic acid epoxygenase activity;arachidonic acid monooxygenase activity;aromatase activity;binding;catalytic activity;cation binding;heme binding;ion binding;iron ion binding;metal ion binding;monooxygenase activity;oxidoreductase activity;oxidoreductase activity, acting on paired donors, with incorporation or reduction of molecular oxygen;oxidoreductase activity, acting on paired donors, w…	cell part;cytoplasm;cytoplasmic part;endoplasmic reticulum membrane;endoplasmic reticulum part;intracellular membrane-bounded organelle;intracellular organelle;intracellular organelle part;intracellular part;membrane;membrane part;membrane-bounded organelle;organelle;organelle membrane;organelle part	Drug metabolism - cytochrome P450	29	29	19	68.6	68.6	52.6	56.949	323.31	5763200000	1479	3	22	21	21	23	25	23	24	27	25	27	22	21	21	23	25	23	24	27	25	27	15	15	14	15	16	15	15	17	17	17	454720000
A0A0R4J015;J3QML2;B2RX12;E9PUE8;B2RUS7;P70170	A0A0R4J015;J3QML2;B2RX12	Canalicular multispecific organic anion transporter 2	Abcc3	bile acid and bile salt transport;canalicular bile acid transport;carboxylic acid transport;cation transport;cellular potassium ion transport;cellular process;defense response;defense response to virus;establishment of localization;immune effector process;immune system process;ion transmembrane transport;ion transport;metal ion transport;monocarboxylic acid transport;monovalent inorganic cation t…	active transmembrane transporter activity;adenyl nucleotide binding;adenyl ribonucleotide binding;ATP binding;ATPase activity;ATPase activity, coupled;ATPase activity, coupled to movement of substances;ATPase activity, coupled to transmembrane movement of substances;binding;catalytic activity;hydrolase activity;hydrolase activity, acting on acid anhydrides;hydrolase activity, acting on acid anhyd…	cation channel complex;cell part;contractile fiber part;cytoplasmic part;integral to membrane;integral to plasma membrane;intracellular part;intrinsic to membrane;intrinsic to plasma membrane;ion channel complex;macromolecular complex;membrane;membrane part;organelle part;plasma membrane;plasma membrane part;potassium channel complex;protein complex;sarcolemma;sarcomere;voltage-gated potassium ch…	ABC transporters;Bile secretion;Type II diabetes mellitus	10	10	10	8.1	8.1	8.1	169.15	11.601	196820000	36	6	5	5	4	3	4	3	3	3	4	3	5	5	4	3	4	3	3	3	4	3	5	5	4	3	4	3	3	3	4	3	41634000
A0A0R4J023;Q9JLZ3;F6RT60;F6R307;A0A0R4J1L8;E9Q6L3;E9QMT1	A0A0R4J023;Q9JLZ3;F6RT60;F6R307	Methylglutaconyl-CoA hydratase, mitochondrial	Auh	amine catabolic process;amine metabolic process;branched chain family amino acid catabolic process;branched chain family amino acid metabolic process;carboxylic acid catabolic process;carboxylic acid metabolic process;catabolic process;cellular amine metabolic process;cellular amino acid catabolic process;cellular amino acid metabolic process;cellular catabolic process;cellular ketone metabolic p…	binding;carbon-oxygen lyase activity;catalytic activity;enoyl-CoA hydratase activity;hydro-lyase activity;lyase activity;methylglutaconyl-CoA hydratase activity;mRNA 3'-UTR binding;mRNA binding;nucleic acid binding;RNA binding	cell part;cytoplasmic part;intracellular membrane-bounded organelle;intracellular organelle;intracellular part;membrane-bounded organelle;mitochondrion;organelle	Valine, leucine and isoleucine degradation	6	6	6	23.2	23.2	23.2	33.338	12	165920000	23	7	2	3	1	2	3	4	1	5	4	3	2	3	1	2	3	4	1	5	4	3	2	3	1	2	3	4	1	5	4	3	17436000
A0A0R4J083;P51174	A0A0R4J083;P51174	Long-chain specific acyl-CoA dehydrogenase, mitochondrial	Acadl	amine catabolic process;amine metabolic process;betaine catabolic process;betaine metabolic process;biological regulation;carboxylic acid catabolic process;carboxylic acid metabolic process;carnitine catabolic process;carnitine metabolic process;carnitine metabolic process, CoA-linked;catabolic process;cellular amine metabolic process;cellular amino acid catabolic process;cellular amino acid meta…	acyl-CoA dehydrogenase activity;acyl-CoA oxidase activity;binding;carboxylic acid binding;catalytic activity;coenzyme binding;cofactor binding;fatty acid binding;fatty-acyl-CoA binding;flavin adenine dinucleotide binding;lipid binding;long-chain-acyl-CoA dehydrogenase activity;monocarboxylic acid binding;oxidoreductase activity;oxidoreductase activity, acting on the CH-CH group of donors;oxidored…	cell part;cytoplasm;cytoplasmic part;intracellular membrane-bounded organelle;intracellular organelle;intracellular organelle lumen;intracellular organelle part;intracellular part;membrane;membrane-bounded organelle;membrane-enclosed lumen;mitochondrial matrix;mitochondrial membrane;mitochondrial part;mitochondrion;organelle;organelle lumen;organelle membrane;organelle part	Fatty acid metabolism;PPAR signaling pathway	17	17	17	40.7	40.7	40.7	47.896	186.29	5492500000	828	2	11	11	13	14	13	13	13	15	13	16	11	11	13	14	13	13	13	15	13	16	11	11	13	14	13	13	13	15	13	16	471620000
S4R2E1;A0A0R4J0B6;Q7TMS5;D3YZX5;S4R2M4;A0A0N4SWA2;D3Z150;D3YVG8	S4R2E1;A0A0R4J0B6;Q7TMS5	ATP-binding cassette sub-family G member 2	Abcg2	cellular metabolic process;cellular nitrogen compound metabolic process;cellular process;cellular response to chemical stimulus;cellular response to corticosteroid stimulus;cellular response to dexamethasone stimulus;cellular response to endogenous stimulus;cellular response to glucocorticoid stimulus;cellular response to hormone stimulus;cellular response to organic substance;cellular response t…	active transmembrane transporter activity;adenyl nucleotide binding;adenyl ribonucleotide binding;ATP binding;ATPase activity;ATPase activity, coupled;ATPase activity, coupled to movement of substances;ATPase activity, coupled to transmembrane movement of substances;binding;catalytic activity;drug transmembrane transporter activity;hydrolase activity;hydrolase activity, acting on acid anhydrides;…	apical plasma membrane;cell part;cytoplasmic part;integral to membrane;intracellular membrane-bounded organelle;intracellular organelle;intracellular organelle part;intracellular part;intrinsic to membrane;membrane;membrane part;membrane-bounded organelle;mitochondrial membrane;mitochondrial part;nuclear part;nucleoplasm;nucleus;organelle;organelle membrane;organelle part;plasma membrane;plasma m…	ABC transporters;Bile secretion	9	9	9	17.4	17.4	17.4	63.607	22.335	363440000	93	8	7	8	7	6	6	5	8	1	5	3	7	8	7	6	6	5	8	1	5	3	7	8	7	6	6	5	8	1	5	3	56020000
A0A0R4J0D3;Q3TDQ1	A0A0R4J0D3;Q3TDQ1	Dolichyl-diphosphooligosaccharide--protein glycosyltransferase subunit STT3B	Stt3b	carbohydrate metabolic process;catabolic process;cellular carbohydrate metabolic process;cellular catabolic process;cellular macromolecule catabolic process;cellular macromolecule metabolic process;cellular metabolic process;cellular process;cellular protein metabolic process;co-translational protein modification;ER-associated protein catabolic process;glycoprotein catabolic process;glycoprotein …	catalytic activity;dolichyl-diphosphooligosaccharide-protein glycotransferase activity;oligosaccharyl transferase activity;transferase activity;transferase activity, transferring glycosyl groups;transferase activity, transferring hexosyl groups	cell part;cytoplasmic part;endoplasmic reticulum;endoplasmic reticulum part;integral to membrane;intracellular membrane-bounded organelle;intracellular organelle;intracellular organelle part;intracellular part;intrinsic to membrane;macromolecular complex;membrane;membrane part;membrane-bounded organelle;oligosaccharyltransferase complex;organelle;organelle part;protein complex	N-Glycan biosynthesis;Protein processing in endoplasmic reticulum;Various types of N-glycan biosynthesis	8	7	7	10.8	10	10	93.314	16.722	145540000	36	2	4	6	7	4	3	5	2	7	7	5	3	5	6	3	2	4	1	6	6	4	3	5	6	3	2	4	1	6	6	4	6602700
A0A0R4J0I1;P07759;Q03734;E9Q499;F2Z405;G3X8T9;P29621;Q91WP6;Q5I2A0;Q80X76	A0A0R4J0I1;P07759	Serine protease inhibitor A3K	Serpina3k	acute inflammatory response;acute-phase response;apoptosis;biological regulation;cell death;cellular process;death;defense response;immune system process;inflammatory response;negative regulation of catalytic activity;negative regulation of endopeptidase activity;negative regulation of hydrolase activity;negative regulation of molecular function;negative regulation of peptidase activity;programme…	cysteine-type endopeptidase inhibitor activity;endopeptidase inhibitor activity;endopeptidase regulator activity;enzyme inhibitor activity;enzyme regulator activity;peptidase inhibitor activity;peptidase regulator activity;serine-type endopeptidase inhibitor activity	blood microparticle;cell part;cytoplasm;extracellular membrane-bounded organelle;extracellular organelle;extracellular region;extracellular region part;extracellular space;extracellular vesicular exosome;intracellular membrane-bounded organelle;intracellular organelle;intracellular part;membrane-bounded organelle;membrane-bounded vesicle;nucleus;organelle;vesicle		14	14	14	37.6	37.6	37.6	46.672	168.98	1396800000	367	10	8	10	10	11	8	6	9	4	12	2	8	10	10	11	8	6	9	4	12	2	8	10	10	11	8	6	9	4	12	2	195000000
A0A0R4J0I6;Q80XL6;D3YTQ5;F6U473	A0A0R4J0I6;Q80XL6;D3YTQ5	Acyl-CoA dehydrogenase family member 11	Acad11	carboxylic acid catabolic process;carboxylic acid metabolic process;catabolic process;cellular catabolic process;cellular ketone metabolic process;cellular lipid catabolic process;cellular lipid metabolic process;cellular metabolic process;cellular process;fatty acid beta-oxidation;fatty acid beta-oxidation using acyl-CoA dehydrogenase;fatty acid catabolic process;fatty acid metabolic process;fat…	acyl-CoA dehydrogenase activity;binding;catalytic activity;coenzyme binding;cofactor binding;flavin adenine dinucleotide binding;long-chain-acyl-CoA dehydrogenase activity;medium-chain-acyl-CoA dehydrogenase activity;oxidoreductase activity;oxidoreductase activity, acting on the CH-CH group of donors;transferase activity;transferase activity, transferring phosphorus-containing groups;very long-ch…	cell part;cytoplasmic part;intracellular membrane-bounded organelle;intracellular organelle;intracellular organelle part;intracellular part;membrane;membrane-bounded organelle;microbody;mitochondrial membrane;mitochondrial part;mitochondrion;nucleus;organelle;organelle membrane;organelle part;peroxisome		25	25	25	40.6	40.6	40.6	87.347	154.18	2357300000	541	4	14	16	18	13	18	18	11	23	20	21	14	16	18	13	18	18	11	23	20	21	14	16	18	13	18	18	11	23	20	21	152750000
A0A0R4J0I9;Q91ZX7;Q3U5J2	A0A0R4J0I9;Q91ZX7	Prolow-density lipoprotein receptor-related protein 1;Low-density lipoprotein receptor-related protein 1 85 kDa subunit;Low-density lipoprotein receptor-related protein 1 515 kDa subunit;Low-density lipoprotein receptor-related protein 1 intracellular domain	Lrp1	activation of protein kinase activity;activation of protein kinase C activity by G-protein coupled receptor protein signaling pathway;aging;alcohol metabolic process;anatomical structure morphogenesis;aorta morphogenesis;apoptotic cell clearance;artery morphogenesis;biological regulation;blood vessel morphogenesis;cell proliferation;cell surface receptor linked signaling pathway;cellular componen…	apolipoprotein binding;binding;calcium ion binding;cation binding;ion binding;metal ion binding;protein binding;protein complex binding	adherens junction;anchoring junction;cell body;cell junction;cell part;cell projection;cell-substrate adherens junction;cell-substrate junction;clathrin-coated vesicle;coated pit;coated vesicle;cytoplasm;cytoplasmic membrane-bounded vesicle;cytoplasmic part;cytoplasmic vesicle;dendrite;endosome;focal adhesion;integral to membrane;integral to plasma membrane;intracellular membrane-bounded organell…	Alzheimer's disease;Malaria	41	41	41	11.4	11.4	11.4	504.77	141.01	1500000000	241	3	21	20	19	16	29	27	30	17	26	20	21	20	19	16	29	27	30	17	26	20	21	20	19	16	29	27	30	17	26	20	129770000
A0A0R4J0N7;O88962	A0A0R4J0N7;O88962	7-alpha-hydroxycholest-4-en-3-one 12-alpha-hydroxylase	Cyp8b1	lipid metabolic process;metabolic process;primary metabolic process	7alpha-hydroxycholest-4-en-3-one 12alpha-hydroxylase activity;binding;catalytic activity;cation binding;heme binding;ion binding;iron ion binding;metal ion binding;monooxygenase activity;oxidoreductase activity;oxidoreductase activity, acting on paired donors, with incorporation or reduction of molecular oxygen;oxidoreductase activity, acting on paired donors, with incorporation or reduction of m…	cell part;cytoplasmic part;endoplasmic reticulum;endoplasmic reticulum membrane;endoplasmic reticulum part;integral to membrane;intracellular membrane-bounded organelle;intracellular organelle;intracellular organelle part;intracellular part;intrinsic to membrane;membrane;membrane part;membrane-bounded organelle;organelle;organelle membrane;organelle part	PPAR signaling pathway;Primary bile acid biosynthesis	11	11	11	18.8	18.8	18.8	57.705	26.82	263920000	52	2	3	8	8	7	6	2	4	1	10	2	3	8	8	7	6	2	4	1	10	2	3	8	8	7	6	2	4	1	10	2	15335000
D3YTT4;A0A0R4J0P1;Q9D7B6	D3YTT4;A0A0R4J0P1;Q9D7B6	Isobutyryl-CoA dehydrogenase, mitochondrial	Acad8	amine catabolic process;amine metabolic process;branched chain family amino acid catabolic process;branched chain family amino acid metabolic process;carboxylic acid catabolic process;carboxylic acid metabolic process;catabolic process;cellular amine metabolic process;cellular amino acid catabolic process;cellular amino acid metabolic process;cellular catabolic process;cellular ketone metabolic p…	acyl-CoA dehydrogenase activity;binding;catalytic activity;coenzyme binding;cofactor binding;flavin adenine dinucleotide binding;oxidoreductase activity;oxidoreductase activity, acting on the CH-CH group of donors	cell part;cytoplasmic part;intracellular membrane-bounded organelle;intracellular organelle;intracellular part;membrane-bounded organelle;mitochondrion;organelle	Valine, leucine and isoleucine degradation	13	13	13	36.8	36.8	36.8	45.075	43.398	1234200000	145	3	10	8	8	9	10	7	8	13	11	11	10	8	8	9	10	7	8	13	11	11	10	8	8	9	10	7	8	13	11	11	133220000
A0A0R4J0P7;Q78KK3	A0A0R4J0P7;Q78KK3	Solute carrier family 22 member 18	Slc22a18	anion transport;cellular process;drug transmembrane transport;drug transport;establishment of localization;ion transport;organic anion transport;transmembrane transport;transport	active transmembrane transporter activity;anion transmembrane transporter activity;binding;drug transmembrane transporter activity;enzyme binding;ion transmembrane transporter activity;organic anion transmembrane transporter activity;protein binding;secondary active transmembrane transporter activity;substrate-specific transmembrane transporter activity;substrate-specific transporter activity;sym…	apical plasma membrane;cell part;cytoplasm;envelope;integral to membrane;integral to plasma membrane;intracellular organelle part;intracellular part;intrinsic to membrane;intrinsic to plasma membrane;membrane;membrane part;nuclear envelope;nuclear part;organelle envelope;organelle part;plasma membrane part		4	4	4	10	10	10	43.375	10.229	165800000	72	2	2	3	2	1	2	3	2	3	3	2	2	3	2	1	2	3	2	3	3	2	2	3	2	1	2	3	2	3	3	2	5967000
A0A0R4J0Q5;P21619	A0A0R4J0Q5;P21619	Lamin-B2	Lmnb2		structural molecule activity	cell part;cytoskeletal part;envelope;intermediate filament;intracellular membrane-bounded organelle;intracellular organelle;intracellular organelle part;intracellular part;lamin filament;macromolecular complex;membrane;membrane-bounded organelle;nuclear envelope;nuclear inner membrane;nuclear membrane;nuclear part;nucleus;organelle;organelle envelope;organelle inner membrane;organelle membrane;or…		14	12	12	21.3	19.8	19.8	69.084	19.786	423890000	75	2	7	10	7	10	7	9	13	4	11	5	6	9	6	9	5	7	11	3	9	4	6	9	6	9	5	7	11	3	9	4	31753000
A0A0R4J0S3;Q924D0;D3Z792	A0A0R4J0S3;Q924D0	Reticulon-4-interacting protein 1, mitochondrial	Rtn4ip1		binding;catalytic activity;cation binding;ion binding;metal ion binding;oxidoreductase activity;transition metal ion binding;zinc ion binding	cell part;cytoplasmic part;intracellular membrane-bounded organelle;intracellular organelle;intracellular part;membrane-bounded organelle;mitochondrion;organelle		5	5	5	17.2	17.2	17.2	43.399	9.9241	160030000	59	3	4	3	1	2	4	2	3	2	2	1	4	3	1	2	4	2	3	2	2	1	4	3	1	2	4	2	3	2	2	1	19466000
A0A0R4J0X5;Q00896;A0A0A0MQA3;P07758;D3YZL0	A0A0R4J0X5;Q00896;A0A0A0MQA3;P07758	Alpha-1-antitrypsin 1-3;Alpha-1-antitrypsin 1-1	Serpina1c;Serpina1a	acute inflammatory response;acute-phase response;biological regulation;carbohydrate metabolic process;cellular carbohydrate metabolic process;cellular macromolecule metabolic process;cellular metabolic process;cellular process;cellular protein metabolic process;defense response;glycosylation;inflammatory response;macromolecule glycosylation;macromolecule metabolic process;macromolecule modificati…	binding;endopeptidase inhibitor activity;endopeptidase regulator activity;enzyme binding;enzyme inhibitor activity;enzyme regulator activity;glycoprotein binding;identical protein binding;peptidase inhibitor activity;peptidase regulator activity;protease binding;protein binding;serine-type endopeptidase inhibitor activity	cell part;cytoplasmic part;endoplasmic reticulum;extracellular membrane-bounded organelle;extracellular organelle;extracellular region;extracellular region part;extracellular space;extracellular vesicular exosome;Golgi apparatus;intracellular membrane-bounded organelle;intracellular organelle;intracellular part;membrane-bounded organelle;membrane-bounded vesicle;organelle;vesicle	Complement and coagulation cascades	9	4	3	31.7	15.5	10.2	45.854	49.817	237060000	52	5	6	7	7	7	5	5	6	7	9	4	3	4	4	3	2	2	3	3	4	1	2	3	3	2	1	1	2	2	3	1	12377000
A0A0R4J0Z1;P08003	A0A0R4J0Z1;P08003	Protein disulfide-isomerase A4	Pdia4	biological regulation;cell redox homeostasis;cellular homeostasis;cellular macromolecule metabolic process;cellular metabolic process;cellular process;cellular protein metabolic process;cellular response to stimulus;cellular response to stress;chaperone-mediated protein folding;homeostatic process;macromolecule metabolic process;metabolic process;primary metabolic process;protein folding;protein …	catalytic activity;intramolecular oxidoreductase activity;intramolecular oxidoreductase activity, interconverting keto- and enol-groups;intramolecular oxidoreductase activity, transposing S-S bonds;isomerase activity;protein disulfide isomerase activity	cell part;cell surface;cytoplasmic membrane-bounded vesicle;cytoplasmic part;cytoplasmic vesicle;endoplasmic reticulum;endoplasmic reticulum chaperone complex;endoplasmic reticulum lumen;endoplasmic reticulum part;intracellular membrane-bounded organelle;intracellular organelle;intracellular organelle lumen;intracellular organelle part;intracellular part;macromolecular complex;melanosome;membrane…	Protein processing in endoplasmic reticulum;Vibrio cholerae infection	28	28	28	41	41	41	72.369	195.02	6957100000	996	2	21	21	23	23	25	22	21	19	22	22	21	21	23	23	25	22	21	19	22	22	21	21	23	23	25	22	21	19	22	22	616150000
A0A0R4J140;Q5SW19;Z4YLI8	A0A0R4J140;Q5SW19;Z4YLI8	Clustered mitochondria protein homolog	Cluh	cellular component organization;cellular component organization at cellular level;cellular component organization or biogenesis;cellular component organization or biogenesis at cellular level;cellular localization;cellular process;intracellular distribution of mitochondria;localization;mitochondrion distribution;mitochondrion localization;mitochondrion organization;organelle localization;organell…	binding;mRNA binding;nucleic acid binding;RNA binding	cell part;cytoplasm;intracellular part		8	8	8	5.9	5.9	5.9	151.83	8.6304	141990000	18	3	4	3	1	0	3	2	5	7	3	3	4	3	1	0	3	2	5	7	3	3	4	3	1	0	3	2	5	7	3	3	11810000
A0A0R4J1H2;Q8QZY2;E0CZG7;E0CXF4	A0A0R4J1H2;Q8QZY2	Glycerate kinase	Glyctk	cellular macromolecule metabolic process;cellular metabolic process;cellular process;cellular protein metabolic process;macromolecule metabolic process;macromolecule modification;metabolic process;phosphate-containing compound metabolic process;phosphorus metabolic process;phosphorylation;primary metabolic process;protein metabolic process;protein modification process;protein phosphorylation	adenyl nucleotide binding;adenyl ribonucleotide binding;ATP binding;binding;catalytic activity;glycerate kinase activity;kinase activity;nucleotide binding;phosphotransferase activity, alcohol group as acceptor;purine nucleotide binding;purine ribonucleoside triphosphate binding;purine ribonucleotide binding;ribonucleotide binding;transferase activity;transferase activity, transferring phosphorus…	cell part;cytoplasm;cytoplasmic part;intracellular membrane-bounded organelle;intracellular organelle;intracellular part;membrane-bounded organelle;mitochondrion;organelle	Glycerolipid metabolism;Glycine, serine and threonine metabolism;Glyoxylate and dicarboxylate metabolism;Methane metabolism	6	6	6	18.7	18.7	18.7	55.334	46.353	344610000	66	4	2	3	2	2	2	1	2	5	6	6	2	3	2	2	2	1	2	5	6	6	2	3	2	2	2	1	2	5	6	6	25302000
E9QN08;A0A0R4J1L2;Q91VK2;Q80T06;P57776;F6ZFU0;A0A0R4J1E2;D3Z7N2;D3YUQ9;D3YZT9;D3YY68	E9QN08;A0A0R4J1L2;Q91VK2;Q80T06;P57776;F6ZFU0;A0A0R4J1E2;D3Z7N2;D3YUQ9;D3YZT9;D3YY68	Elongation factor 1-delta	Eef1d	biological regulation;biosynthetic process;cellular biosynthetic process;cellular macromolecule biosynthetic process;cellular macromolecule metabolic process;cellular metabolic process;cellular nitrogen compound metabolic process;cellular process;cellular response to abiotic stimulus;cellular response to ionizing radiation;cellular response to radiation;cellular response to stimulus;macromolecule…	activating transcription factor binding;binding;DNA binding;heat shock protein binding;molecular transducer activity;nucleic acid binding;protein binding;RNA binding;signal transducer activity;transcription factor binding;translation elongation factor activity;translation factor activity, nucleic acid binding	cell part;cytoplasm;cytoplasmic part;eukaryotic translation elongation factor 1 complex;intracellular membrane-bounded organelle;intracellular non-membrane-bounded organelle;intracellular organelle;intracellular organelle part;intracellular part;macromolecular complex;membrane-bounded organelle;non-membrane-bounded organelle;nuclear part;nucleolus;nucleus;organelle;organelle part;protein complex		6	6	6	27.8	27.8	27.8	27.217	84.397	198800000	42	11	3	4	2	3	2	1	4	5	2	3	3	4	2	3	2	1	4	5	2	3	3	4	2	3	2	1	4	5	2	3	12458000
G3X9S2;A0A0R4J1Q7;P06802;E9QQ26	G3X9S2;A0A0R4J1Q7;P06802	Ectonucleotide pyrophosphatase/phosphodiesterase family member 1;Alkaline phosphodiesterase I;Nucleotide pyrophosphatase	Enpp1	3'-phosphoadenosine 5'-phosphosulfate metabolic process;anatomical structure development;anion homeostasis;anion transport;biological regulation;biomineral tissue development;bone remodeling;catabolic process;cellular anion homeostasis;cellular catabolic process;cellular chemical homeostasis;cellular homeostasis;cellular ion homeostasis;cellular metabolic process;cellular nitrogen compound catabo…	adenyl nucleotide binding;adenyl ribonucleotide binding;ATP binding;binding;calcium ion binding;carbohydrate binding;cargo receptor activity;catalytic activity;cation binding;exonuclease activity;hydrolase activity;hydrolase activity, acting on acid anhydrides;hydrolase activity, acting on acid anhydrides, in phosphorus-containing anhydrides;hydrolase activity, acting on ester bonds;identical pro…	basolateral plasma membrane;cell part;cell surface;cytoplasmic part;extracellular region part;extracellular space;integral to membrane;integral to plasma membrane;intracellular organelle part;intracellular part;intrinsic to membrane;intrinsic to plasma membrane;lysosomal membrane;membrane;membrane part;organelle membrane;organelle part;plasma membrane;plasma membrane part;vacuolar membrane;vacuol…	Nicotinate and nicotinamide metabolism;Pantothenate and CoA biosynthesis;Purine metabolism;Riboflavin metabolism;Starch and sucrose metabolism	5	5	5	6.6	6.6	6.6	103.03	10.748	102060000	21	4	3	1	2	2	2	3	3	2	3	3	3	1	2	2	2	3	3	2	3	3	3	1	2	2	2	3	3	2	3	3	10450000
A0A0R4J1Y7;E9PXX7;Q3TEE8;Q91W90	A0A0R4J1Y7;E9PXX7;Q3TEE8;Q91W90	Thioredoxin domain-containing protein 5	Txndc5	apoptotic cell clearance;biological regulation;cell redox homeostasis;cellular component organization;cellular component organization or biogenesis;cellular homeostasis;cellular macromolecule metabolic process;cellular membrane organization;cellular metabolic process;cellular process;cellular protein metabolic process;cellular response to stimulus;cellular response to stress;endocytosis;establish…	catalytic activity;intramolecular oxidoreductase activity;intramolecular oxidoreductase activity, interconverting keto- and enol-groups;intramolecular oxidoreductase activity, transposing S-S bonds;isomerase activity;protein disulfide isomerase activity	cell part;cytoplasmic part;endoplasmic reticulum lumen;endoplasmic reticulum part;extracellular membrane-bounded organelle;extracellular organelle;extracellular region part;extracellular vesicular exosome;intracellular organelle lumen;intracellular organelle part;intracellular part;membrane-bounded organelle;membrane-bounded vesicle;membrane-enclosed lumen;organelle;organelle lumen;organelle part…	Protein processing in endoplasmic reticulum	8	8	8	32.2	32.2	32.2	36.083	44.439	954090000	326	4	7	7	7	7	8	8	8	8	6	6	7	7	7	7	8	8	8	8	6	6	7	7	7	7	8	8	8	8	6	6	70644000
A0A0R4J1Z3;Q9CR67;E0CXY5;Q9CZM3	A0A0R4J1Z3;Q9CR67	Transmembrane protein 33	Tmem33	cellular component assembly;cellular component assembly at cellular level;cellular component organization;cellular component organization at cellular level;cellular component organization or biogenesis;cellular component organization or biogenesis at cellular level;cellular localization;cellular macromolecular complex assembly;cellular macromolecular complex subunit organization;cellular macromol…	structural constituent of nuclear pore;structural molecule activity	cell part;cytoplasmic membrane-bounded vesicle;cytoplasmic part;cytoplasmic vesicle;endoplasmic reticulum;extracellular membrane-bounded organelle;extracellular organelle;extracellular region part;extracellular vesicular exosome;intracellular membrane-bounded organelle;intracellular organelle;intracellular organelle part;intracellular part;macromolecular complex;melanosome;membrane part;membrane-…		5	5	5	22.4	22.4	22.4	27.932	16.85	145450000	31	4	3	3	2	1	4	4	2	3	1	2	3	3	2	1	4	4	2	3	1	2	3	3	2	1	4	4	2	3	1	2	13824000
A0A0R4J275;Q7TMF3;F6RBR6	A0A0R4J275;Q7TMF3	NADH dehydrogenase [ubiquinone] 1 alpha subcomplex subunit 12	Ndufa12	response to chemical stimulus;response to oxidative stress;response to stimulus;response to stress	catalytic activity;electron carrier activity;NADH dehydrogenase (quinone) activity;NADH dehydrogenase (ubiquinone) activity;NADH dehydrogenase activity;oxidoreductase activity;oxidoreductase activity, acting on NADH or NADPH;oxidoreductase activity, acting on NADH or NADPH, quinone or similar compound as acceptor	cell part;cytoplasm;cytoplasmic part;intracellular membrane-bounded organelle;intracellular organelle;intracellular organelle part;intracellular part;macromolecular complex;membrane part;membrane-bounded organelle;mitochondrial membrane part;mitochondrial part;mitochondrial respiratory chain complex I;mitochondrion;NADH dehydrogenase complex;organelle;organelle part;protein complex;respiratory ch…	Alzheimer's disease;Huntington's disease;Oxidative phosphorylation;Parkinson's disease	10	10	10	61.7	61.7	61.7	17.633	109.73	2927700000	453	3	5	6	5	6	6	6	7	10	9	10	5	6	5	6	6	6	7	10	9	10	5	6	5	6	6	6	7	10	9	10	280370000
A0A140LHR3;A0A140LJ01;A0A140LHG8;Q9CYN2;A0A140LJG6;A0A140LIK0	A0A140LHR3;A0A140LJ01;A0A140LHG8;Q9CYN2;A0A140LJG6;A0A140LIK0	Signal peptidase complex subunit 2	Spcs2	cellular macromolecule metabolic process;cellular metabolic process;cellular process;cellular protein metabolic process;macromolecule metabolic process;metabolic process;peptide metabolic process;primary metabolic process;protein maturation;protein metabolic process;protein processing;signal peptide processing	catalytic activity;hydrolase activity;peptidase activity	cell part;cytoplasmic part;endoplasmic reticulum part;integral to membrane;intracellular organelle part;intracellular part;intrinsic to membrane;macromolecular complex;membrane part;organelle part;protein complex;signal peptidase complex	Protein export	4	4	4	24.7	24.7	24.7	21.997	23.141	296680000	99	6	3	3	4	2	4	4	4	2	2	2	3	3	4	2	4	4	4	2	2	2	3	3	4	2	4	4	4	2	2	2	25293000
A0A140LIF0;Q3TYT1;P97478	A0A140LIF0;Q3TYT1;P97478	5-demethoxyubiquinone hydroxylase, mitochondrial	Coq7	age-dependent response to oxidative stress;anatomical structure formation involved in morphogenesis;anatomical structure morphogenesis;ATP synthesis coupled electron transport;biosynthetic process;cell differentiation;cell part morphogenesis;cellular biosynthetic process;cellular component morphogenesis;cellular component organization;cellular component organization at cellular level;cellular com…	binding;catalytic activity;cation binding;ion binding;metal ion binding;monooxygenase activity;oxidoreductase activity	cell part;cytoplasmic part;intracellular membrane-bounded organelle;intracellular organelle;intracellular organelle part;intracellular part;membrane;membrane-bounded organelle;mitochondrial inner membrane;mitochondrial membrane;mitochondrial part;mitochondrion;nucleus;organelle;organelle inner membrane;organelle membrane;organelle part	Ubiquinone and other terpenoid-quinone biosynthesis	5	5	5	33.8	33.8	33.8	24.764	15.059	184400000	43	3	3	1	1	1	4	3	3	3	2	3	3	1	1	1	4	3	3	3	2	3	3	1	1	1	4	3	3	3	2	3	15788000
A0A140LIT2;O88455;D3Z7G1	A0A140LIT2;O88455	7-dehydrocholesterol reductase	Dhcr7	alcohol metabolic process;anatomical structure development;biological regulation;biosynthetic process;blood vessel development;cell differentiation;cellular developmental process;cellular process;cholesterol biosynthetic process;cholesterol metabolic process;developmental process;growth;lipid biosynthetic process;lipid metabolic process;lung development;metabolic process;multicellular organism gr…	7-dehydrocholesterol reductase activity;catalytic activity;oxidoreductase activity;oxidoreductase activity, acting on the CH-CH group of donors;oxidoreductase activity, acting on the CH-CH group of donors, NAD or NADP as acceptor	cell part;cytoplasmic part;endoplasmic reticulum;endoplasmic reticulum membrane;endoplasmic reticulum part;integral to membrane;intracellular membrane-bounded organelle;intracellular organelle;intracellular organelle part;intracellular part;intrinsic to membrane;membrane;membrane part;membrane-bounded organelle;nuclear membrane;nuclear outer membrane;nuclear part;organelle;organelle membrane;orga…	Steroid biosynthesis	5	5	5	13.9	13.9	13.9	54.219	26.39	416820000	105	3	4	5	4	4	5	4	2	4	3	4	4	5	4	4	5	4	2	4	3	4	4	5	4	4	5	4	2	4	3	4	26465000
A0A140T8J4;Q9R257	A0A140T8J4;Q9R257	Heme-binding protein 1	Hebp1	cellular metabolic process;cellular process;cofactor metabolic process;heme metabolic process;heterocycle metabolic process;metabolic process;nitrogen compound metabolic process;pigment metabolic process;porphyrin-containing compound metabolic process;tetrapyrrole metabolic process	binding;cation binding;heme binding;ion binding;iron ion binding;metal ion binding;tetrapyrrole binding;transition metal ion binding	cell part;cytoplasm;cytoplasmic part;cytosol;extracellular membrane-bounded organelle;extracellular organelle;extracellular region part;extracellular vesicular exosome;intracellular membrane-bounded organelle;intracellular organelle;intracellular part;membrane-bounded organelle;membrane-bounded vesicle;mitochondrion;organelle;vesicle		5	5	5	43.2	43.2	43.2	21.053	39.65	1095800000	216	2	3	3	3	3	4	3	4	4	4	5	3	3	3	3	4	3	4	4	4	5	3	3	3	3	4	3	4	4	4	5	84080000
Q6ZWZ4;A0A140T8K6;P47964	Q6ZWZ4;A0A140T8K6	60S ribosomal protein L36	Rpl36	biosynthetic process;cellular biosynthetic process;cellular macromolecule biosynthetic process;cellular macromolecule metabolic process;cellular metabolic process;cellular process;cellular protein metabolic process;macromolecule biosynthetic process;macromolecule metabolic process;metabolic process;primary metabolic process;protein metabolic process;translation	structural constituent of ribosome;structural molecule activity	cell part;cytoplasmic part;cytosolic large ribosomal subunit;intracellular non-membrane-bounded organelle;intracellular organelle;intracellular organelle part;intracellular part;large ribosomal subunit;macromolecular complex;membrane;non-membrane-bounded organelle;nuclear part;nucleolus;organelle;organelle part;ribonucleoprotein complex;ribosome	Ribosome	3	3	3	21.9	21.9	21.9	12.254	14.69	352280000	100	3	2	3	1	2	2	2	2	3	3	2	2	3	1	2	2	2	2	3	3	2	2	3	1	2	2	2	2	3	3	2	19817000
Q5M9M5;A0A140T8M7;P62751;D3YTY6	Q5M9M5;A0A140T8M7;P62751	60S ribosomal protein L23a	Rpl23a	biosynthetic process;cellular biosynthetic process;cellular macromolecule biosynthetic process;cellular macromolecule metabolic process;cellular metabolic process;cellular process;cellular protein metabolic process;macromolecule biosynthetic process;macromolecule metabolic process;metabolic process;primary metabolic process;protein metabolic process;translation	binding;nucleic acid binding;nucleotide binding;RNA binding;rRNA binding;structural constituent of ribosome;structural molecule activity	cell part;cytoplasmic part;intracellular membrane-bounded organelle;intracellular non-membrane-bounded organelle;intracellular organelle;intracellular part;macromolecular complex;membrane-bounded organelle;non-membrane-bounded organelle;nucleus;organelle;ribonucleoprotein complex;ribosome	Ribosome	8	8	8	42.9	42.9	42.9	17.695	31.621	1374500000	145	4	4	4	5	4	5	4	5	7	7	7	4	4	5	4	5	4	5	7	7	7	4	4	5	4	5	4	5	7	7	7	50359000
Q3TX38;A0A140T8V3;Q60931;J3QMG3	Q3TX38;A0A140T8V3;Q60931;J3QMG3	Voltage-dependent anion-selective channel protein 3	Vdac3	behavior;behavioral defense response;behavioral fear response;cell communication;cell-cell signaling;cellular process;cognition;defense response;fear response;learning;learning or memory;multicellular organismal process;multicellular organismal response to stress;neurological system process;neuron-neuron synaptic transmission;response to stimulus;response to stress;signaling;synaptic transmission…	anion channel activity;anion transmembrane transporter activity;binding;channel activity;gated channel activity;ion channel activity;ion transmembrane transporter activity;nucleotide binding;passive transmembrane transporter activity;porin activity;substrate-specific channel activity;substrate-specific transmembrane transporter activity;substrate-specific transporter activity;transmembrane transp…	cell part;cytoplasmic part;extracellular membrane-bounded organelle;extracellular organelle;extracellular region part;extracellular vesicular exosome;intracellular membrane-bounded organelle;intracellular organelle;intracellular organelle part;intracellular part;macromolecular complex;membrane;membrane part;membrane-bounded organelle;membrane-bounded vesicle;mitochondrial inner membrane;mitochond…	Calcium signaling pathway;Huntington's disease;Parkinson's disease	7	7	7	36.7	36.7	36.7	30.752	107.8	1423000000	245	4	6	7	6	5	7	6	6	4	4	5	6	7	6	5	7	6	6	4	4	5	6	7	6	5	7	6	6	4	4	5	138710000
A1L3B8;P26516	A1L3B8;P26516	26S proteasome non-ATPase regulatory subunit 7	Psmd7		binding;identical protein binding;protein binding;protein dimerization activity;protein homodimerization activity	cell part;extracellular membrane-bounded organelle;extracellular organelle;extracellular region part;extracellular vesicular exosome;intracellular membrane-bounded organelle;intracellular organelle;intracellular organelle part;intracellular part;macromolecular complex;membrane;membrane-bounded organelle;membrane-bounded vesicle;nuclear part;nucleoplasm;nucleus;organelle;organelle part;proteasome …	Proteasome	9	9	9	42.4	42.4	42.4	36.539	28.076	415790000	86	2	4	5	5	4	7	3	5	5	5	7	4	5	5	4	7	3	5	5	5	7	4	5	5	4	7	3	5	5	5	7	53167000
A2A547;Q5I0T8;P84099	A2A547;Q5I0T8;P84099	Ribosomal protein L19;60S ribosomal protein L19	Rpl19	biosynthetic process;cellular biosynthetic process;cellular macromolecule biosynthetic process;cellular macromolecule metabolic process;cellular metabolic process;cellular process;cellular protein metabolic process;macromolecule biosynthetic process;macromolecule metabolic process;metabolic process;primary metabolic process;protein metabolic process;translation	structural constituent of ribosome;structural molecule activity	adherens junction;anchoring junction;cell junction;cell part;cell-substrate adherens junction;cell-substrate junction;cytoplasm;cytosolic large ribosomal subunit;focal adhesion;intracellular non-membrane-bounded organelle;intracellular organelle;intracellular organelle part;intracellular part;large ribosomal subunit;macromolecular complex;membrane;non-membrane-bounded organelle;nuclear part;nucle…	Ribosome	3	3	3	12.9	12.9	12.9	23.247	8.8721	801510000	73	3	2	1	1	1	2	2	2	3	1	2	2	1	1	1	2	2	2	3	1	2	2	1	1	1	2	2	2	3	1	2	68258000
A2A7A7;Q8CFX1;A2A7A8	A2A7A7;Q8CFX1	GDH/6PGL endoplasmic bifunctional protein;Glucose 1-dehydrogenase;6-phosphogluconolactonase	H6pd	alcohol catabolic process;alcohol metabolic process;carbohydrate catabolic process;carbohydrate metabolic process;catabolic process;cellular carbohydrate catabolic process;cellular carbohydrate metabolic process;cellular metabolic process;cellular nitrogen compound metabolic process;cellular process;coenzyme metabolic process;cofactor metabolic process;glucose catabolic process;glucose metabolic …	6-phosphogluconolactonase activity;binding;carbohydrate binding;carboxylic ester hydrolase activity;catalytic activity;coenzyme binding;cofactor binding;glucose 1-dehydrogenase [NAD(P)] activity;glucose-6-phosphate dehydrogenase activity;hydrolase activity;hydrolase activity, acting on ester bonds;NADP binding;nucleotide binding;oxidoreductase activity;oxidoreductase activity, acting on CH-OH gro…	cell part;cytoplasmic part;endoplasmic reticulum lumen;endoplasmic reticulum part;intracellular membrane-bounded organelle;intracellular organelle;intracellular organelle lumen;intracellular organelle part;intracellular part;membrane-bounded organelle;membrane-enclosed lumen;mitochondrion;organelle;organelle lumen;organelle part	Pentose phosphate pathway	24	24	24	40.5	40.5	40.5	89.909	175.66	2406300000	509	3	20	15	15	15	16	14	12	15	17	17	20	15	15	15	16	14	12	15	17	17	20	15	15	15	16	14	12	15	17	17	267500000
A2A848	A2A848		Acox1	biological regulation;carboxylic acid catabolic process;carboxylic acid metabolic process;catabolic process;cellular catabolic process;cellular component organization;cellular component organization at cellular level;cellular component organization or biogenesis;cellular component organization or biogenesis at cellular level;cellular ketone metabolic process;cellular lipid catabolic process;cellu…	acyl-CoA dehydrogenase activity;acyl-CoA oxidase activity;binding;catalytic activity;coenzyme binding;cofactor binding;FAD binding;flavin adenine dinucleotide binding;oxidoreductase activity;oxidoreductase activity, acting on the CH-CH group of donors;oxidoreductase activity, acting on the CH-CH group of donors, oxygen as acceptor;palmitoyl-CoA oxidase activity;PDZ domain binding;protein binding;…	cell part;cytoplasm;cytoplasmic part;intracellular membrane-bounded organelle;intracellular non-membrane-bounded organelle;intracellular organelle;intracellular organelle part;intracellular part;membrane;membrane-bounded organelle;microbody;microbody membrane;microbody part;mitochondrion;non-membrane-bounded organelle;nuclear part;nucleolus;nucleoplasm;nucleus;organelle;organelle membrane;organel…		34	2	2	74.2	8.6	8.6	70.03	194.44	562890000	200	1	27	30	29	31	27	28	27	29	33	33	2	2	2	2	1	2	1	2	2	2	2	2	2	2	1	2	1	2	2	2	39005000
A2AA71;Q3U2P1	A2AA71;Q3U2P1	Protein transport protein Sec24A	Sec24a	biological regulation;cellular process;ER to Golgi vesicle-mediated transport;establishment of localization;establishment of localization in cell;establishment of protein localization;Golgi vesicle transport;intracellular protein transport;intracellular transport;positive regulation of biological process;positive regulation of cellular process;positive regulation of cholesterol homeostasis;positi…	binding;cation binding;ion binding;metal ion binding;transition metal ion binding;zinc ion binding	cell part;COPII vesicle coat;cytoplasmic part;cytoplasmic vesicle part;endoplasmic reticulum membrane;endoplasmic reticulum part;Golgi apparatus part;Golgi membrane;intracellular organelle part;intracellular part;macromolecular complex;membrane;membrane coat;membrane part;organelle membrane;organelle part;perinuclear region of cytoplasm;protein complex;vesicle coat	Protein processing in endoplasmic reticulum	8	8	8	8.4	8.4	8.4	118.65	11.852	163880000	59	2	5	4	5	3	6	5	5	5	2	2	5	4	5	3	6	5	5	5	2	2	5	4	5	3	6	5	5	5	2	2	38565000
A2ABY3;Q3USD5;Q922E4	A2ABY3;Q3USD5;Q922E4	Ethanolamine-phosphate cytidylyltransferase	Pcyt2	alcohol metabolic process;amine biosynthetic process;amine metabolic process;biosynthetic process;cellular amine metabolic process;cellular biogenic amine biosynthetic process;cellular biogenic amine metabolic process;cellular biosynthetic process;cellular lipid metabolic process;cellular metabolic process;cellular nitrogen compound biosynthetic process;cellular nitrogen compound metabolic proces…	catalytic activity;cytidylyltransferase activity;ethanolamine-phosphate cytidylyltransferase activity;nucleotidyltransferase activity;transferase activity;transferase activity, transferring phosphorus-containing groups		Glycerophospholipid metabolism;Phosphonate and phosphinate metabolism	7	7	7	20.7	20.7	20.7	43.446	22.135	283880000	58	3	3	4	3	4	5	2	4	6	3	4	3	4	3	4	5	2	4	6	3	4	3	4	3	4	5	2	4	6	3	4	28741000
A2ACG7;Q9DBG6	A2ACG7;Q9DBG6	Dolichyl-diphosphooligosaccharide--protein glycosyltransferase subunit 2	Rpn2	aging;carbohydrate metabolic process;cellular carbohydrate metabolic process;cellular macromolecule metabolic process;cellular metabolic process;cellular process;cellular protein metabolic process;developmental process;glycosylation;macromolecule glycosylation;macromolecule metabolic process;macromolecule modification;metabolic process;primary metabolic process;protein glycosylation;protein metab…	binding;catalytic activity;ribonucleoprotein binding;ribosome binding;transferase activity;transferase activity, transferring glycosyl groups	autophagic vacuole membrane;cell part;cytoplasmic part;endoplasmic reticulum;endoplasmic reticulum part;integral to membrane;intracellular membrane-bounded organelle;intracellular organelle;intracellular organelle part;intracellular part;intrinsic to membrane;macromolecular complex;membrane;membrane part;membrane-bounded organelle;nucleus;oligosaccharyltransferase complex;organelle;organelle memb…	N-Glycan biosynthesis;Protein processing in endoplasmic reticulum;Various types of N-glycan biosynthesis	20	20	20	49.8	49.8	49.8	67.501	323.31	4623700000	1321	2	16	16	18	17	17	17	17	17	17	13	16	16	18	17	17	17	17	17	17	13	16	16	18	17	17	17	17	17	17	13	470330000
F6TBV1;F6WHL0;A2ADH1;Q9CQY5	F6TBV1;F6WHL0;A2ADH1;Q9CQY5	Magnesium transporter protein 1	Magt1	biological regulation;cation transport;cell redox homeostasis;cellular homeostasis;cellular process;cognition;divalent inorganic cation transport;divalent metal ion transport;establishment of localization;homeostatic process;ion transport;magnesium ion transport;metal ion transport;multicellular organismal process;neurological system process;regulation of biological process;regulation of biologic…	cation transmembrane transporter activity;divalent inorganic cation transmembrane transporter activity;inorganic cation transmembrane transporter activity;ion transmembrane transporter activity;magnesium ion transmembrane transporter activity;metal ion transmembrane transporter activity;substrate-specific transmembrane transporter activity;substrate-specific transporter activity;transmembrane tra…	cell part;cytoplasmic part;endoplasmic reticulum part;integral to membrane;intracellular organelle part;intracellular part;intrinsic to membrane;macromolecular complex;membrane;membrane part;oligosaccharyltransferase complex;organelle part;plasma membrane;protein complex		4	4	4	11.9	11.9	11.9	35.154	4.6653	147620000	26	4	2	2	2	1	2	3	2	4	3	3	2	2	2	1	2	3	2	4	3	3	2	2	2	1	2	3	2	4	3	3	9562300
Q8CBM2;A2AL85;Q8BSY0	Q8CBM2;A2AL85;Q8BSY0	Aspartyl/asparaginyl beta-hydroxylase	Asph	activation of store-operated calcium channel activity;anatomical structure development;anatomical structure morphogenesis;appendage morphogenesis;biological regulation;calcium ion transmembrane transport;calcium ion transport;cation transport;cellular macromolecule metabolic process;cellular metabolic process;cellular process;cellular protein metabolic process;cellular response to calcium ion;cel…	binding;calcium ion binding;catalytic activity;cation binding;ion binding;metal ion binding;oxidoreductase activity;oxidoreductase activity, acting on paired donors, with incorporation or reduction of molecular oxygen;oxidoreductase activity, acting on paired donors, with incorporation or reduction of molecular oxygen, 2-oxoglutarate as one donor, and incorporation of one atom each of oxygen into…	cell cortex part;cell part;cortical endoplasmic reticulum;cytoplasm;cytoplasmic part;endoplasmic reticulum;endoplasmic reticulum membrane;endoplasmic reticulum part;integral to endoplasmic reticulum membrane;integral to membrane;integral to organelle membrane;intracellular membrane-bounded organelle;intracellular organelle;intracellular organelle part;intracellular part;intrinsic to endoplasmic r…		3	3	3	6.8	6.8	6.8	75.127	39.418	82884000	38	3	1	1	2	2	1	3	1	1	3	2	1	1	2	2	1	3	1	1	3	2	1	1	2	2	1	3	1	1	3	2	1603300
A2AP31;Q3UIU2;A2AP32	A2AP31;Q3UIU2;A2AP32	NADH dehydrogenase [ubiquinone] 1 beta subcomplex subunit 6	Ndufb6	metabolic process;oxidation-reduction process		cell part;cytoplasmic part;integral to membrane;intracellular membrane-bounded organelle;intracellular organelle;intracellular organelle part;intracellular part;intrinsic to membrane;macromolecular complex;membrane;membrane part;membrane-bounded organelle;mitochondrial membrane;mitochondrial membrane part;mitochondrial part;mitochondrial respiratory chain complex I;mitochondrion;NADH dehydrogenas…	Alzheimer's disease;Huntington's disease;Oxidative phosphorylation;Parkinson's disease	7	7	7	55.5	55.5	55.5	15.515	44.917	516800000	308	3	2	4	4	4	3	4	2	3	3	5	2	4	4	4	3	4	2	3	3	5	2	4	4	4	3	4	2	3	3	5	53156000
A2AQN5;A2AQN4;Q9QXG4;F7CU63;D6RHA7	A2AQN5;A2AQN4;Q9QXG4;F7CU63	Acetyl-coenzyme A synthetase, cytoplasmic	Acss2	acetate biosynthetic process;acetate metabolic process;acetyl-CoA biosynthetic process;acetyl-CoA metabolic process;biosynthetic process;carboxylic acid biosynthetic process;carboxylic acid metabolic process;cellular biosynthetic process;cellular ketone metabolic process;cellular metabolic process;cellular process;coenzyme biosynthetic process;coenzyme metabolic process;cofactor biosynthetic proc…	acetate-CoA ligase activity;acid-thiol ligase activity;adenyl nucleotide binding;adenyl ribonucleotide binding;ATP binding;binding;catalytic activity;CoA-ligase activity;ligase activity;ligase activity, forming carbon-sulfur bonds;nucleotide binding;purine nucleotide binding;purine ribonucleoside triphosphate binding;purine ribonucleotide binding;ribonucleotide binding	cell part;cytoplasm;intracellular membrane-bounded organelle;intracellular organelle;intracellular organelle part;intracellular part;membrane-bounded organelle;nuclear part;nucleoplasm;organelle;organelle part	Carbon fixation pathways in prokaryotes;Glycolysis / Gluconeogenesis;Methane metabolism;Propanoate metabolism;Pyruvate metabolism	10	10	10	16.7	16.7	16.7	79.343	32.392	378060000	77	5	6	3	6	4	6	3	4	9	3	7	6	3	6	4	6	3	4	9	3	7	6	3	6	4	6	3	4	9	3	7	47684000
A2AQY8;Q05CI8;Q8BTY1;A2AQY9	A2AQY8;Q05CI8;Q8BTY1;A2AQY9	Kynurenine--oxoglutarate transaminase 1	Ccbl1	amine metabolic process;biosynthetic process;carboxylic acid metabolic process;cellular amine metabolic process;cellular amino acid metabolic process;cellular ketone metabolic process;cellular metabolic process;cellular modified amino acid metabolic process;cellular nitrogen compound metabolic process;cellular process;kynurenine metabolic process;L-kynurenine catabolic process;L-kynurenine metabo…	binding;carbon-sulfur lyase activity;catalytic activity;cofactor binding;cysteine-S-conjugate beta-lyase activity;glutamine-phenylpyruvate transaminase activity;identical protein binding;kynurenine-oxoglutarate transaminase activity;L-glutamine:pyruvate aminotransferase activity;L-phenylalanine aminotransferase activity;L-phenylalanine:pyruvate aminotransferase activity;lyase activity;protein bin…	cell part;cytoplasm;intracellular organelle part;intracellular part;nuclear part;nucleoplasm;organelle part	Selenocompound metabolism;Tryptophan metabolism	3	3	3	9.1	9.1	9.1	42.235	7.9667	214440000	37	4	3	2	1	2	2	1	2	3	1	3	3	2	1	2	2	1	2	3	1	3	3	2	1	2	2	1	2	3	1	3	27237000
A2ARD6;Q9CXF0;A2ARD7;Q6NSV5	A2ARD6;Q9CXF0;A2ARD7;Q6NSV5	Kynureninase	Kynu	acetyl-CoA metabolic process;amine catabolic process;amine metabolic process;anthranilate metabolic process;aromatic amino acid family catabolic process;aromatic amino acid family metabolic process;aromatic compound catabolic process;benzene-containing compound metabolic process;benzoate metabolic process;biosynthetic process;carboxylic acid biosynthetic process;carboxylic acid catabolic process;…	binding;catalytic activity;cofactor binding;hydrolase activity;hydrolase activity, acting on acid carbon-carbon bonds;hydrolase activity, acting on acid carbon-carbon bonds, in ketonic substances;identical protein binding;kynureninase activity;protein binding;protein dimerization activity;protein homodimerization activity;pyridoxal phosphate binding;vitamin B6 binding;vitamin binding	cell part;cytoplasm;cytoplasmic part;cytosol;intracellular membrane-bounded organelle;intracellular organelle;intracellular organelle part;intracellular part;membrane-bounded organelle;mitochondrion;nuclear part;nucleoplasm;organelle;organelle part	Tryptophan metabolism	10	10	10	28.4	28.4	28.4	52.456	27.178	334330000	67	4	4	4	4	2	6	3	6	6	5	5	4	4	4	2	6	3	6	6	5	5	4	4	4	2	6	3	6	6	5	5	20961000
A2AS89	A2AS89	Agmatinase, mitochondrial	Agmat	amine biosynthetic process;amine metabolic process;biosynthetic process;cellular amine metabolic process;cellular biogenic amine biosynthetic process;cellular biogenic amine metabolic process;cellular biosynthetic process;cellular metabolic process;cellular nitrogen compound biosynthetic process;cellular nitrogen compound metabolic process;cellular process;metabolic process;nitrogen compound meta…	agmatinase activity;binding;catalytic activity;cation binding;hydrolase activity;hydrolase activity, acting on carbon-nitrogen (but not peptide) bonds;hydrolase activity, acting on carbon-nitrogen (but not peptide) bonds, in linear amidines;ion binding;metal ion binding	cell part;cytoplasmic part;extracellular membrane-bounded organelle;extracellular organelle;extracellular region part;extracellular vesicular exosome;intracellular membrane-bounded organelle;intracellular organelle;intracellular part;membrane-bounded organelle;membrane-bounded vesicle;mitochondrion;organelle;vesicle	Arginine and proline metabolism	8	8	8	31.6	31.6	31.6	38.255	104.31	1608500000	324	1	3	8	5	5	7	6	7	7	8	6	3	8	5	5	7	6	7	7	8	6	3	8	5	5	7	6	7	7	8	6	86134000
A2ATU0	A2ATU0	Probable 2-oxoglutarate dehydrogenase E1 component DHKTD1, mitochondrial	Dhtkd1	acetyl-CoA catabolic process;acetyl-CoA metabolic process;alcohol catabolic process;alcohol metabolic process;carbohydrate catabolic process;carbohydrate metabolic process;catabolic process;cell differentiation;cellular carbohydrate catabolic process;cellular carbohydrate metabolic process;cellular catabolic process;cellular developmental process;cellular metabolic process;cellular process;coenzy…	binding;catalytic activity;coenzyme binding;cofactor binding;oxidoreductase activity;oxidoreductase activity, acting on the aldehyde or oxo group of donors;oxidoreductase activity, acting on the aldehyde or oxo group of donors, disulfide as acceptor;oxoglutarate dehydrogenase (succinyl-transferring) activity;thiamine pyrophosphate binding;vitamin binding	cell part;cytoplasmic part;intracellular membrane-bounded organelle;intracellular organelle;intracellular part;macromolecular complex;membrane-bounded organelle;mitochondrion;organelle;oxoglutarate dehydrogenase complex;protein complex		17	17	17	25.8	25.8	25.8	102.79	75.779	695450000	177	1	4	7	7	5	8	8	6	16	7	13	4	7	7	5	8	8	6	16	7	13	4	7	7	5	8	8	6	16	7	13	25857000
V9GWU5;Q3TAI4;A2AUD5;Q9CYZ2;F6VQ81;Q3TUJ9;Q8BKP1	V9GWU5;Q3TAI4;A2AUD5;Q9CYZ2;F6VQ81;Q3TUJ9;Q8BKP1	Tumor protein D54	Tpd52l2		binding;identical protein binding;protein binding;protein dimerization activity;protein heterodimerization activity;protein homodimerization activity	cell part;cytoplasm;cytoplasmic part;intracellular part;perinuclear region of cytoplasm		5	5	5	30.6	30.6	30.6	18.724	24.535	225790000	66	7	3	5	4	4	4	1	5	1	2	1	3	5	4	4	4	1	5	1	2	1	3	5	4	4	4	1	5	1	2	1	7533200
A2AVJ7;Q99PL5	A2AVJ7;Q99PL5	Ribosome-binding protein 1	Rrbp1	biological regulation;cell differentiation;cellular developmental process;cellular process;cellular response to stimulus;developmental process;establishment of localization;establishment of protein localization;osteoblast differentiation;protein transport;regulation of biological process;regulation of cellular process;response to stimulus;signal transduction;transport		cell part;cytoplasmic part;endoplasmic reticulum part;integral to endoplasmic reticulum membrane;integral to membrane;integral to organelle membrane;intracellular organelle part;intracellular part;intrinsic to endoplasmic reticulum membrane;intrinsic to membrane;intrinsic to organelle membrane;membrane part;organelle part	Protein processing in endoplasmic reticulum	14	14	14	10.3	10.3	10.3	158.39	45.458	348860000	47	2	1	1	2	2	3	4	6	13	8	6	1	1	2	2	3	4	6	13	8	6	1	1	2	2	3	4	6	13	8	6	6177600
F6V6T4;A2RS53;Q9R0Q3;Q8BPI2	F6V6T4;A2RS53;Q9R0Q3;Q8BPI2	Transmembrane emp24 domain-containing protein 2	Tmed2	anatomical structure development;anatomical structure morphogenesis;biological regulation;blood vessel development;cellular component organization;cellular component organization at cellular level;cellular component organization or biogenesis;cellular component organization or biogenesis at cellular level;cellular process;developmental process;embryonic morphogenesis;embryonic organ development;e…		cell part;coated vesicle;coated vesicle membrane;COPI coated vesicle membrane;COPI-coated vesicle;cytoplasmic membrane-bounded vesicle;cytoplasmic part;cytoplasmic vesicle;cytoplasmic vesicle membrane;cytoplasmic vesicle part;endoplasmic reticulum;endoplasmic reticulum membrane;endoplasmic reticulum part;endoplasmic reticulum-Golgi intermediate compartment;endoplasmic reticulum-Golgi intermediate…		4	4	4	28.4	28.4	28.4	19.914	39.769	382140000	132	4	2	2	3	3	3	3	2	1	3	2	2	2	3	3	3	3	2	1	3	2	2	2	3	3	3	3	2	1	3	2	34746000
A2RS96;Q9CXE7;E9PXY3;D3Z615;Q8C5H9;Q3V440;E9Q2J2	A2RS96;Q9CXE7;E9PXY3	Transmembrane emp24 domain-containing protein 5	Tmed5	cellular component organization;cellular component organization at cellular level;cellular component organization or biogenesis;cellular component organization or biogenesis at cellular level;cellular process;establishment of localization;establishment of protein localization;Golgi organization;Golgi ribbon formation;organelle organization;protein transport;transport		cell part;cis-Golgi network;cytoplasmic part;endoplasmic reticulum exit site;endoplasmic reticulum membrane;endoplasmic reticulum part;endoplasmic reticulum-Golgi intermediate compartment;endoplasmic reticulum-Golgi intermediate compartment membrane;Golgi apparatus;Golgi apparatus part;integral to membrane;intracellular membrane-bounded organelle;intracellular organelle;intracellular organelle pa…		6	6	6	30.6	30.6	30.6	26.172	22.484	589230000	155	7	4	4	4	4	6	6	5	1	3	3	4	4	4	4	6	6	5	1	3	3	4	4	4	4	6	6	5	1	3	3	49474000
A2RSC2;Q9DBK0	A2RSC2;Q9DBK0	Acyl-coenzyme A thioesterase 12	Acot12	acetyl-CoA metabolic process;carboxylic acid metabolic process;cellular ketone metabolic process;cellular lipid metabolic process;cellular metabolic process;cellular process;coenzyme metabolic process;cofactor metabolic process;fatty acid metabolic process;lipid metabolic process;metabolic process;monocarboxylic acid metabolic process;organic acid metabolic process;oxoacid metabolic process;prima…	acetyl-CoA hydrolase activity;adenyl nucleotide binding;adenyl ribonucleotide binding;ATP binding;binding;carboxylic ester hydrolase activity;catalytic activity;CoA hydrolase activity;hydrolase activity;hydrolase activity, acting on ester bonds;lipid binding;nucleotide binding;purine nucleotide binding;purine ribonucleoside triphosphate binding;purine ribonucleotide binding;ribonucleotide binding…	cell part;cytoplasmic part;cytosol;intracellular part	Pyruvate metabolism	7	7	7	15.8	15.8	15.8	61.761	12.777	194540000	56	2	3	3	3	3	2	5	2	6	4	5	3	3	3	3	2	5	2	6	4	5	3	3	3	3	2	5	2	6	4	5	23806000
A2RSV8;P19783;M0QWX7;D6RG40	A2RSV8;P19783	Cytochrome c oxidase subunit 4 isoform 1, mitochondrial	Cox4i1	alcohol metabolic process;amine biosynthetic process;amine metabolic process;biosynthetic process;CDP-choline pathway;cellular amine metabolic process;cellular biogenic amine biosynthetic process;cellular biogenic amine metabolic process;cellular biosynthetic process;cellular lipid metabolic process;cellular metabolic process;cellular nitrogen compound biosynthetic process;cellular nitrogen compo…	binding;carboxylic ester hydrolase activity;catalytic activity;cation transmembrane transporter activity;choline kinase activity;cholinesterase activity;cytochrome-c oxidase activity;drug binding;ethanolamine kinase activity;heme-copper terminal oxidase activity;hydrogen ion transmembrane transporter activity;hydrolase activity;hydrolase activity, acting on ester bonds;identical protein binding;i…	cell part;cytoplasmic part;extracellular membrane-bounded organelle;extracellular organelle;extracellular region part;extracellular vesicular exosome;intracellular membrane-bounded organelle;intracellular organelle;intracellular organelle part;intracellular part;membrane;membrane-bounded organelle;membrane-bounded vesicle;mitochondrial inner membrane;mitochondrial membrane;mitochondrial part;mito…	Alzheimer's disease;Cardiac muscle contraction;Huntington's disease;Oxidative phosphorylation;Parkinson's disease	12	12	12	54.4	54.4	54.4	19.53	314.57	13177000000	1361	4	7	9	8	8	8	8	8	10	10	8	7	9	8	8	8	8	8	10	10	8	7	9	8	8	8	8	8	10	10	8	1145800000
A2RTT4;P61089	A2RTT4;P61089	Ubiquitin-conjugating enzyme E2 N	Ube2n	activation of immune response;antigen receptor-mediated signaling pathway;biological regulation;catabolic process;cell surface receptor linked signaling pathway;cellular catabolic process;cellular component organization;cellular component organization at cellular level;cellular component organization or biogenesis;cellular component organization or biogenesis at cellular level;cellular macromolec…	acid-amino acid ligase activity;adenyl nucleotide binding;adenyl ribonucleotide binding;ATP binding;binding;catalytic activity;enzyme binding;ligase activity;ligase activity, forming carbon-nitrogen bonds;nucleotide binding;protein binding;purine nucleotide binding;purine ribonucleoside triphosphate binding;purine ribonucleotide binding;ribonucleotide binding;small conjugating protein binding;sma…	cell part;cytoplasm;extracellular membrane-bounded organelle;extracellular organelle;extracellular region part;extracellular vesicular exosome;intracellular membrane-bounded organelle;intracellular organelle;intracellular part;macromolecular complex;membrane-bounded organelle;membrane-bounded vesicle;nucleus;organelle;protein complex;UBC13-MMS2 complex;UBC13-UEV1A complex;ubiquitin conjugating en…	Ubiquitin mediated proteolysis	5	5	5	42.1	42.1	42.1	17.138	17.508	237800000	40	2	2	3	3	2	3	2	2	3	3	3	2	3	3	2	3	2	2	3	3	3	2	3	3	2	3	2	2	3	3	3	18511000
A3KGR9;Q9D8V0;Q6PGJ8	A3KGR9;Q9D8V0;Q6PGJ8	Minor histocompatibility antigen H13	H13;Hm13	macromolecule metabolic process;membrane protein proteolysis;metabolic process;primary metabolic process;protein metabolic process;proteolysis	aspartic endopeptidase activity, intramembrane cleaving;aspartic-type endopeptidase activity;aspartic-type peptidase activity;binding;catalytic activity;endopeptidase activity;enzyme binding;hydrolase activity;identical protein binding;peptidase activity;peptidase activity, acting on L-amino acid peptides;protein binding;protein dimerization activity;protein homodimerization activity;ubiquitin pr…	cell part;cell surface;cytoplasmic part;endoplasmic reticulum;endoplasmic reticulum membrane;endoplasmic reticulum part;integral to cytosolic side of endoplasmic reticulum membrane;integral to endoplasmic reticulum membrane;integral to lumenal side of endoplasmic reticulum membrane;integral to membrane;integral to organelle membrane;intracellular membrane-bounded organelle;intracellular organelle…		2	2	2	6.3	6.3	6.3	38.174	22.549	310730000	87	3	2	2	2	2	2	2	2	2	2	2	2	2	2	2	2	2	2	2	2	2	2	2	2	2	2	2	2	2	2	2	8770000
A3KMP2;D6RH59	A3KMP2	Tetratricopeptide repeat protein 38	Ttc38			extracellular membrane-bounded organelle;extracellular organelle;extracellular region part;extracellular vesicular exosome;membrane-bounded organelle;membrane-bounded vesicle;organelle;vesicle		12	12	12	30.3	30.3	30.3	52.223	42.852	450740000	102	2	4	5	2	6	5	4	6	9	6	10	4	5	2	6	5	4	6	9	6	10	4	5	2	6	5	4	6	9	6	10	27757000
A4FUS1;P14131	A4FUS1;P14131	40S ribosomal protein S16	Rps16	biosynthetic process;cellular biosynthetic process;cellular component biogenesis;cellular component biogenesis at cellular level;cellular component organization or biogenesis;cellular component organization or biogenesis at cellular level;cellular macromolecule biosynthetic process;cellular macromolecule metabolic process;cellular metabolic process;cellular nitrogen compound metabolic process;cel…	binding;nucleic acid binding;RNA binding;structural constituent of ribosome;structural molecule activity	adherens junction;anchoring junction;cell junction;cell part;cell-substrate adherens junction;cell-substrate junction;cytosolic small ribosomal subunit;extracellular membrane-bounded organelle;extracellular organelle;extracellular region part;extracellular vesicular exosome;focal adhesion;intracellular organelle part;intracellular part;macromolecular complex;membrane;membrane-bounded organelle;me…	Ribosome	7	7	7	41.1	41.1	41.1	16.445	28.387	1259400000	340	2	5	6	6	5	4	5	5	7	7	6	5	6	6	5	4	5	5	7	7	6	5	6	6	5	4	5	5	7	7	6	93677000
A5GZX3;Q9CPU0	A5GZX3;Q9CPU0	Lactoylglutathione lyase	Glo1	amine metabolic process;biological regulation;carbohydrate metabolic process;carboxylic acid metabolic process;cell differentiation;cellular aldehyde metabolic process;cellular amine metabolic process;cellular amino acid metabolic process;cellular developmental process;cellular ketone metabolic process;cellular metabolic process;cellular modified amino acid metabolic process;cellular nitrogen com…	binding;carbon-sulfur lyase activity;catalytic activity;cation binding;ion binding;lactoylglutathione lyase activity;lyase activity;metal ion binding;transition metal ion binding;zinc ion binding	extracellular membrane-bounded organelle;extracellular organelle;extracellular region part;extracellular vesicular exosome;membrane-bounded organelle;membrane-bounded vesicle;organelle;vesicle	MAPK signaling pathway - yeast;Pyruvate metabolism	10	10	10	52.2	52.2	52.2	20.809	86.113	1371500000	359	2	6	8	8	9	7	7	6	7	10	10	6	8	8	9	7	7	6	7	10	10	6	8	8	9	7	7	6	7	10	10	109490000
Q5FWB7;A6ZI44;P05064;Q9CPQ9;A6ZI46;A0A0U1RPN8;D3YWI1;D3Z510;D3YV98;A0A0U1RPT5;A6ZI47	Q5FWB7;A6ZI44;P05064;Q9CPQ9;A6ZI46;A0A0U1RPN8;D3YWI1	Fructose-bisphosphate aldolase;Fructose-bisphosphate aldolase A	Aldoa;Aldoart1	alcohol catabolic process;alcohol metabolic process;carbohydrate catabolic process;carbohydrate metabolic process;catabolic process;cellular carbohydrate catabolic process;cellular carbohydrate metabolic process;cellular component assembly;cellular component organization;cellular component organization or biogenesis;cellular metabolic process;cellular process;generation of precursor metabolites a…	aldehyde-lyase activity;binding;carbon-carbon lyase activity;catalytic activity;enzyme binding;fructose-bisphosphate aldolase activity;lyase activity;protease binding;protein binding	cell part;contractile fiber part;cytoplasmic part;intracellular membrane-bounded organelle;intracellular organelle;intracellular part;M band;macromolecular complex;membrane;membrane-bounded organelle;mitochondrion;myelin sheath;organelle;organelle part;protein complex;Z disc	Carbon fixation in photosynthetic organisms;Fructose and mannose metabolism;Glycolysis / Gluconeogenesis;Pentose phosphate pathway	9	9	9	32.1	32.1	32.1	39.355	73.892	621520000	105	11	5	4	4	4	6	4	6	7	6	8	5	4	4	4	6	4	6	7	6	8	5	4	4	4	6	4	6	7	6	8	34867000
A8DUK4;P02088;E9Q223;P02089;CON__Q3SX09;CON__P02070;P02104	A8DUK4;P02088;E9Q223	Hemoglobin subunit beta-1	Hbbt1;Hbb-b1;Hbb-bs	anatomical structure development;biological regulation;cell development;cellular developmental process;cellular process;developmental process;erythrocyte development;negative regulation of biological process;negative regulation of biosynthetic process;negative regulation of cellular biosynthetic process;negative regulation of cellular macromolecule biosynthetic process;negative regulation of cell…	binding;cation binding;heme binding;ion binding;iron ion binding;metal ion binding;oxygen binding;oxygen transporter activity;substrate-specific transporter activity;tetrapyrrole binding;transition metal ion binding;transporter activity	blood microparticle;cell part;cytoplasmic part;cytosolic part;extracellular region part;hemoglobin complex;intracellular part;macromolecular complex;myelin sheath;protein complex	African trypanosomiasis;Malaria	15	15	15	95.2	95.2	95.2	15.748	323.31	76624000000	5702	7	14	14	13	14	15	13	14	15	15	15	14	14	13	14	15	13	14	15	15	15	14	14	13	14	15	13	14	15	15	15	5204800000
A8IP69;P61982	A8IP69;P61982	14-3-3 protein gamma;14-3-3 protein gamma, N-terminally processed	Ywhag	biological regulation;cellular process;cellular response to chemical stimulus;cellular response to endogenous stimulus;cellular response to hormone stimulus;cellular response to insulin stimulus;cellular response to organic substance;cellular response to peptide hormone stimulus;cellular response to stimulus;establishment of localization;establishment of localization in cell;establishment of prot…	actin binding;binding;catalytic activity;cytoskeletal protein binding;enzyme binding;insulin-like growth factor receptor binding;kinase binding;monooxygenase activity;oxidoreductase activity;protein binding;protein domain specific binding;protein kinase binding;protein kinase C binding;receptor binding	adherens junction;anchoring junction;cell junction;cell part;cell-substrate adherens junction;cell-substrate junction;cytoplasmic part;cytoplasmic vesicle membrane;cytoplasmic vesicle part;cytosol;extracellular membrane-bounded organelle;extracellular organelle;extracellular region part;extracellular vesicular exosome;focal adhesion;intracellular organelle part;intracellular part;membrane;membran…	Cell cycle;Neurotrophin signaling pathway;Oocyte meiosis	10	6	5	41.3	27.5	23.5	28.302	14.534	443850000	79	2	7	7	7	9	8	7	8	9	6	10	4	4	4	5	5	4	4	6	3	6	3	3	3	4	4	3	3	5	2	5	21319000
B1AQR8;G3X9T7;O08573	B1AQR8;G3X9T7;O08573	Galectin;Galectin-9	Lgals9	biological adhesion;cell adhesion;cell-cell adhesion;cellular process;heterophilic cell-cell adhesion	binding;carbohydrate binding;galactoside binding;monosaccharide binding;sugar binding	cell part;cytoplasm;extracellular region;intracellular part		8	8	8	29.5	29.5	29.5	39.907	117.94	1854900000	341	3	6	6	6	5	6	7	5	7	8	7	6	6	6	5	6	7	5	7	8	7	6	6	6	5	6	7	5	7	8	7	230880000
Z4YKM2;B2RWE3;B1AR13	Z4YKM2;B2RWE3;B1AR13	CDGSH iron-sulfur domain-containing protein 3, mitochondrial	Cisd3		2 iron, 2 sulfur cluster binding;binding;cation binding;ion binding;iron-sulfur cluster binding;metal cluster binding;metal ion binding	cell part;cytoplasmic part;intracellular membrane-bounded organelle;intracellular organelle;intracellular part;membrane-bounded organelle;mitochondrion;organelle		2	2	2	18.3	18.3	18.3	13.155	3.0404	161750000	27	3	1	2	1	2	2	2	1	2	1	2	1	2	1	2	2	2	1	2	1	2	1	2	1	2	2	2	1	2	1	2	5444100
B1ARW4;Q99LY9	B1ARW4;Q99LY9	NADH dehydrogenase [ubiquinone] iron-sulfur protein 5;NADH dehydrogenase [ubiquinone] iron-sulfur protein 5, N-terminally processed	Ndufs5	cellular component assembly;cellular component assembly at cellular level;cellular component biogenesis;cellular component organization;cellular component organization at cellular level;cellular component organization or biogenesis;cellular component organization or biogenesis at cellular level;cellular macromolecular complex assembly;cellular macromolecular complex subunit organization;cellular …		cell part;cytoplasmic part;intracellular membrane-bounded organelle;intracellular organelle;intracellular organelle part;intracellular part;membrane;membrane part;membrane-bounded organelle;membrane-enclosed lumen;mitochondrial inner membrane;mitochondrial intermembrane space;mitochondrial membrane;mitochondrial part;mitochondrion;organelle;organelle envelope lumen;organelle inner membrane;organe…	Alzheimer's disease;Huntington's disease;Oxidative phosphorylation;Parkinson's disease	5	5	5	51.6	51.6	51.6	10.909	106.63	745020000	274	2	2	2	2	2	2	2	2	5	5	4	2	2	2	2	2	2	2	5	5	4	2	2	2	2	2	2	2	5	5	4	74345000
B1ASZ3;Q64516;Q9WU65;Q8C635	B1ASZ3;Q64516	Glycerol kinase	Gyk;Gk	acylglycerol metabolic process;alcohol biosynthetic process;alcohol catabolic process;alcohol metabolic process;alditol biosynthetic process;alditol catabolic process;alditol metabolic process;biological regulation;biosynthetic process;carbohydrate biosynthetic process;carbohydrate catabolic process;carbohydrate homeostasis;carbohydrate metabolic process;catabolic process;cellular biosynthetic pr…	adenyl nucleotide binding;adenyl ribonucleotide binding;ATP binding;binding;catalytic activity;glycerol kinase activity;kinase activity;nucleotide binding;phosphotransferase activity, alcohol group as acceptor;purine nucleotide binding;purine ribonucleoside triphosphate binding;purine ribonucleotide binding;ribonucleotide binding;transferase activity;transferase activity, transferring phosphorus-…	cell part;cytoplasmic part;cytosol;extracellular membrane-bounded organelle;extracellular organelle;extracellular region part;extracellular vesicular exosome;intracellular membrane-bounded organelle;intracellular organelle;intracellular organelle part;intracellular part;membrane;membrane-bounded organelle;membrane-bounded vesicle;mitochondrial membrane;mitochondrial outer membrane;mitochondrial p…	Glycerolipid metabolism;Plant-pathogen interaction;PPAR signaling pathway	7	7	7	10.9	10.9	10.9	59.832	12.835	252780000	85	4	4	3	3	2	3	3	3	5	3	6	4	3	3	2	3	3	3	5	3	6	4	3	3	2	3	3	3	5	3	6	19452000
B1AV77;B1ATI0;P47740;A0A140LJF9;P47739	B1AV77;B1ATI0;P47740	Aldehyde dehydrogenase;Fatty aldehyde dehydrogenase	Aldh3a2	aging;alcohol metabolic process;anatomical structure development;biological regulation;cellular aldehyde metabolic process;cellular lipid metabolic process;cellular metabolic process;cellular process;central nervous system development;developmental process;epidermis development;isoprenoid metabolic process;lipid metabolic process;metabolic process;oxidation-reduction process;peripheral nervous sy…	3-chloroallyl aldehyde dehydrogenase activity;alcohol dehydrogenase (NADP+) activity;aldehyde dehydrogenase (NAD) activity;aldehyde dehydrogenase [NAD(P)+] activity;aldo-keto reductase (NADP) activity;benzaldehyde dehydrogenase (NAD+) activity;catalytic activity;long-chain-alcohol oxidase activity;long-chain-aldehyde dehydrogenase activity;oxidoreductase activity;oxidoreductase activity, acting o…	cell part;cytoplasm;cytoplasmic part;cytosol;endoplasmic reticulum;endoplasmic reticulum membrane;endoplasmic reticulum part;extracellular membrane-bounded organelle;extracellular organelle;extracellular region part;extracellular space;extracellular vesicular exosome;integral to membrane;intracellular membrane-bounded organelle;intracellular organelle;intracellular organelle part;intracellular pa…	Arginine and proline metabolism;Ascorbate and aldarate metabolism;beta-Alanine metabolism;Chloroalkane and chloroalkene degradation;Drug metabolism - cytochrome P450;Fatty acid metabolism;Glycerolipid metabolism;Glycolysis / Gluconeogenesis;Histidine metabolism;Limonene and pinene degradation;Lysine degradation;Metabolism of xenobiotics by cytochrome P450;Pentose and glucuronate interconversions;…	22	22	22	48.9	48.9	48.9	54.33	323.31	14895000000	2108	5	17	18	19	19	16	17	19	20	20	19	17	18	19	19	16	17	19	20	20	19	17	18	19	19	16	17	19	20	20	19	1721100000
B1AU25;Q9Z0X1	B1AU25;Q9Z0X1	Apoptosis-inducing factor 1, mitochondrial	Aifm1	activation of caspase activity;apoptosis;apoptosis in response to endoplasmic reticulum stress;apoptotic mitochondrial changes;biological regulation;cell death;cell differentiation;cell redox homeostasis;cellular component assembly;cellular component assembly at cellular level;cellular component biogenesis;cellular component organization;cellular component organization at cellular level;cellular …	binding;catalytic activity;coenzyme binding;cofactor binding;DNA binding;electron-transferring-flavoprotein dehydrogenase activity;FAD binding;flavin adenine dinucleotide binding;NAD(P)H oxidase activity;nucleic acid binding;oxidoreductase activity;oxidoreductase activity, acting on NADH or NADPH;oxidoreductase activity, acting on NADH or NADPH, oxygen as acceptor;oxidoreductase activity, acting …	cell part;cytoplasm;cytoplasmic part;cytosol;intracellular membrane-bounded organelle;intracellular organelle;intracellular organelle part;intracellular part;membrane;membrane-bounded organelle;membrane-enclosed lumen;mitochondrial inner membrane;mitochondrial intermembrane space;mitochondrial membrane;mitochondrial outer membrane;mitochondrial part;mitochondrion;nucleus;organelle;organelle envel…	Apoptosis	23	23	23	41.9	41.9	41.9	66.113	323.31	7444800000	1332	2	20	21	19	20	19	19	19	18	19	19	20	21	19	20	19	19	19	18	19	19	20	21	19	20	19	19	19	18	19	19	674910000
B1B0C7;E9PZ16;Q05793	B1B0C7;E9PZ16;Q05793	Basement membrane-specific heparan sulfate proteoglycan core protein;Endorepellin;LG3 peptide	Hspg2	anatomical structure development;anatomical structure formation involved in morphogenesis;anatomical structure morphogenesis;angiogenesis;brain development;cardiac muscle tissue development;cartilage development;cartilage development involved in endochondral bone morphogenesis;cell differentiation;cellular component organization;cellular component organization at cellular level;cellular component…	binding;cation binding;enzyme binding;ion binding;metal ion binding;protease binding;protein binding;protein C-terminus binding	adherens junction;anchoring junction;basal lamina;basement membrane;cell junction;cell part;cell-substrate adherens junction;cell-substrate junction;cytoplasmic part;extracellular matrix;extracellular matrix part;extracellular membrane-bounded organelle;extracellular organelle;extracellular region;extracellular region part;extracellular space;extracellular vesicular exosome;focal adhesion;Golgi a…	ECM-receptor interaction	12	12	12	3.6	3.6	3.6	469.02	91.729	511200000	125	3	9	6	4	6	10	9	6	6	4	7	9	6	4	6	10	9	6	6	4	7	9	6	4	6	10	9	6	6	4	7	73071000
B2M1R6;P61979;H3BLL4;H3BK96;H3BKD0;H3BKI8;H3BJS9;H3BJ43;Q8BT23;H3BLP7	B2M1R6;P61979;H3BLL4;H3BK96;H3BKD0;H3BKI8	Heterogeneous nuclear ribonucleoprotein K	Hnrnpk	biological regulation;cellular macromolecule metabolic process;cellular metabolic process;cellular nitrogen compound metabolic process;cellular process;macromolecule metabolic process;metabolic process;mRNA metabolic process;mRNA processing;negative regulation of biological process;negative regulation of cellular metabolic process;negative regulation of cellular process;negative regulation of mac…	binding;core promoter proximal region DNA binding;core promoter proximal region sequence-specific DNA binding;DNA binding;nucleic acid binding;nucleic acid binding transcription factor activity;regulatory region DNA binding;regulatory region nucleic acid binding;RNA binding;RNA polymerase II core promoter proximal region sequence-specific DNA binding;RNA polymerase II core promoter proximal regio…	adherens junction;anchoring junction;catalytic step 2 spliceosome;cell junction;cell part;cell projection;cell-substrate adherens junction;cell-substrate junction;chromatin;chromosomal part;cytoplasm;cytoskeletal part;extracellular membrane-bounded organelle;extracellular organelle;extracellular region part;extracellular vesicular exosome;focal adhesion;intracellular non-membrane-bounded organell…	Spliceosome	9	9	9	26.6	26.6	26.6	48.562	72.976	500020000	125	10	5	4	5	4	3	4	5	9	7	8	5	4	5	4	3	4	5	9	7	8	5	4	5	4	3	4	5	9	7	8	39542000
B2MWM9;P14211	B2MWM9;P14211	Calreticulin	Calr	actin cytoskeleton organization;actin filament-based process;aging;biological regulation;cardiac cell differentiation;cardiac muscle cell differentiation;cell aging;cell cycle arrest;cell cycle process;cell differentiation;cellular component assembly;cellular component assembly at cellular level;cellular component organization;cellular component organization at cellular level;cellular component o…	androgen receptor binding;binding;calcium ion binding;carbohydrate binding;cation binding;enzyme binding;glycoprotein binding;hormone binding;hormone receptor binding;integrin binding;ion binding;iron ion binding;metal ion binding;mRNA binding;nuclear hormone receptor binding;nucleic acid binding;peptide binding;protein binding;protein complex binding;receptor binding;RNA binding;steroid hormone …	acrosomal vesicle;adherens junction;anchoring junction;cell junction;cell part;cell-substrate adherens junction;cell-substrate junction;cytoplasm;cytoplasmic membrane-bounded vesicle;cytoplasmic part;cytoplasmic vesicle;cytosol;endocytic vesicle;endoplasmic reticulum;endoplasmic reticulum lumen;endoplasmic reticulum part;external side of plasma membrane;extracellular matrix;extracellular membrane…	Antigen processing and presentation;Chagas disease (American trypanosomiasis);Phagosome;Protein processing in endoplasmic reticulum	22	22	22	71.2	71.2	71.2	47.994	323.31	13882000000	1749	2	20	16	19	21	20	22	20	16	17	17	20	16	19	21	20	22	20	16	17	17	20	16	19	21	20	22	20	16	17	17	1341200000
B2RS41;Q8BWF0	B2RS41;Q8BWF0	Succinate-semialdehyde dehydrogenase, mitochondrial	Aldh5a1	acetate metabolic process;alcohol metabolic process;amine catabolic process;amine metabolic process;anatomical structure development;biological regulation;carbohydrate metabolic process;carboxylic acid catabolic process;carboxylic acid metabolic process;catabolic process;cellular amine metabolic process;cellular amino acid catabolic process;cellular amino acid metabolic process;cellular carbohydr…	aldehyde dehydrogenase (NAD) activity;catalytic activity;oxidoreductase activity;oxidoreductase activity, acting on the aldehyde or oxo group of donors;oxidoreductase activity, acting on the aldehyde or oxo group of donors, NAD or NADP as acceptor;succinate-semialdehyde dehydrogenase [NAD(P)+] activity;succinate-semialdehyde dehydrogenase activity	cell part;cytoplasmic part;intracellular membrane-bounded organelle;intracellular organelle;intracellular part;membrane-bounded organelle;mitochondrion;organelle	Alanine, aspartate and glutamate metabolism;Butanoate metabolism	12	12	12	31.7	31.7	31.7	55.968	42.392	581400000	95	2	2	5	5	5	6	3	5	9	6	6	2	5	5	5	6	3	5	9	6	6	2	5	5	5	6	3	5	9	6	6	10489000
B2RS80;Q9QYC7;A0A0U1RPG7;A0A0U1RPU0	B2RS80;Q9QYC7	Vitamin K-dependent gamma-carboxylase	Ggcx	cellular macromolecule metabolic process;cellular metabolic process;cellular process;cellular protein metabolic process;macromolecule metabolic process;macromolecule modification;metabolic process;peptidyl-amino acid modification;peptidyl-glutamic acid carboxylation;peptidyl-glutamic acid modification;primary metabolic process;protein carboxylation;protein metabolic process;protein modification p…	carbon-carbon lyase activity;carboxy-lyase activity;catalytic activity;gamma-glutamyl carboxylase activity;lyase activity	cell part;cytoplasmic part;endoplasmic reticulum membrane;endoplasmic reticulum part;integral to membrane;intracellular organelle part;intracellular part;intrinsic to membrane;membrane;membrane part;organelle membrane;organelle part		7	7	7	9.5	9.5	9.5	87.194	25.962	246500000	78	4	4	4	5	5	6	4	3	3	3	2	4	4	5	5	6	4	3	3	3	2	4	4	5	5	6	4	3	3	3	2	42992000
B2RSR0;Q9DBW0;H9H9R5	B2RSR0;Q9DBW0	Cytochrome P450 4V2	Cyp4v3;Cyp4v2	carboxylic acid metabolic process;cellular ketone metabolic process;cellular lipid metabolic process;cellular metabolic process;cellular process;fatty acid metabolic process;fatty acid omega-oxidation;fatty acid oxidation;lipid metabolic process;lipid modification;lipid oxidation;metabolic process;monocarboxylic acid metabolic process;organic acid metabolic process;oxidation-reduction process;oxo…	binding;catalytic activity;cation binding;heme binding;ion binding;iron ion binding;metal ion binding;monooxygenase activity;oxidoreductase activity;oxidoreductase activity, acting on paired donors, with incorporation or reduction of molecular oxygen;tetrapyrrole binding;transition metal ion binding	cell part;cytoplasmic part;endoplasmic reticulum membrane;endoplasmic reticulum part;integral to membrane;intracellular organelle part;intracellular part;intrinsic to membrane;membrane;membrane part;organelle membrane;organelle part		11	11	11	25.1	25.1	25.1	60.938	47.658	519780000	129	3	8	7	9	6	9	6	6	6	7	4	8	7	9	6	9	6	6	6	7	4	8	7	9	6	9	6	6	6	7	4	61026000
B2RT14;P70691	B2RT14;P70691	UDP-glucuronosyltransferase 1-2	Ugt1a5;Ugt1a2	alcohol metabolic process;aromatic compound biosynthetic process;biosynthetic process;carbohydrate metabolic process;carboxylic acid metabolic process;cellular aromatic compound metabolic process;cellular biosynthetic process;cellular carbohydrate metabolic process;cellular glucuronidation;cellular ketone metabolic process;cellular metabolic process;cellular process;cellular response to chemical …	binding;carboxylic acid binding;catalytic activity;enzyme binding;glucuronosyltransferase activity;identical protein binding;isoprenoid binding;lipid binding;monocarboxylic acid binding;protein binding;protein dimerization activity;protein heterodimerization activity;protein homodimerization activity;retinoic acid binding;retinoid binding;transferase activity;transferase activity, transferring gl…	cell part;cytoplasmic part;endoplasmic reticulum;endoplasmic reticulum membrane;endoplasmic reticulum part;integral to membrane;intracellular membrane-bounded organelle;intracellular organelle;intracellular organelle part;intracellular part;intrinsic to membrane;membrane;membrane part;membrane-bounded organelle;organelle;organelle membrane;organelle part	Ascorbate and aldarate metabolism;Drug metabolism - cytochrome P450;Drug metabolism - other enzymes;Metabolism of xenobiotics by cytochrome P450;Other types of O-glycan biosynthesis;Pentose and glucuronate interconversions;Porphyrin and chlorophyll metabolism;Retinol metabolism;Starch and sucrose metabolism;Steroid hormone biosynthesis	18	10	10	46.7	23.3	23.3	60.073	39.881	546590000	263	2	11	12	11	12	13	8	14	12	13	12	6	7	6	6	8	3	8	5	6	5	6	7	6	6	8	3	8	5	6	5	33892000
B2RT97;Q9WVJ2;E9Q5I9;E9Q0U1;F6ZQQ3;F6PXS6	B2RT97;Q9WVJ2;E9Q5I9;E9Q0U1	26S proteasome non-ATPase regulatory subunit 13	Psmd13	cell cycle phase;cell cycle process;cellular process;macromolecule metabolic process;meiosis I;metabolic process;primary metabolic process;protein metabolic process;proteolysis	catalytic activity;endopeptidase activity;hydrolase activity;peptidase activity;peptidase activity, acting on L-amino acid peptides	cell part;extracellular membrane-bounded organelle;extracellular organelle;extracellular region part;extracellular vesicular exosome;intracellular membrane-bounded organelle;intracellular organelle;intracellular part;macromolecular complex;membrane;membrane-bounded organelle;membrane-bounded vesicle;nucleus;organelle;proteasome accessory complex;proteasome complex;proteasome regulatory particle;p…	Proteasome	11	11	11	33	33	33	42.809	20.155	763210000	158	6	8	7	5	7	11	10	11	10	9	7	8	7	5	7	11	10	11	10	9	7	8	7	5	7	11	10	11	10	9	7	76483000
B2RVD5;B2RTK3;Q8CBB6;Q8CGP2;Q8CGP1;Q6ZWY9;Q64525;Q64478;Q64475;P10854;P10853;Q9D2U9;Q8CGP0;Q64524;P70696	B2RVD5;B2RTK3;Q8CBB6;Q8CGP2;Q8CGP1;Q6ZWY9;Q64525;Q64478;Q64475;P10854;P10853;Q9D2U9;Q8CGP0;Q64524;P70696	Histone H2B;Histone H2B type 1-P;Histone H2B type 1-K;Histone H2B type 1-C/E/G;Histone H2B type 2-B;Histone H2B type 1-H;Histone H2B type 1-B;Histone H2B type 1-M;Histone H2B type 1-F/J/L;Histone H2B type 3-A;Histone H2B type 3-B;Histone H2B type 2-E;Histone H2B type 1-A	Hist1h2bk;Hist1h2bm;Hist1h2br;Hist1h2bp;Hist1h2bc;Hist2h2bb;Hist1h2bh;Hist1h2bb;Hist1h2bf;Hist3h2ba;Hist3h2bb;Hist2h2be;Hist1h2ba	antibacterial humoral response;antimicrobial humoral response;ATP-dependent chromatin remodeling;biological regulation;cell migration;cell motility;cellular component assembly;cellular component assembly at cellular level;cellular component disassembly;cellular component disassembly at cellular level;cellular component movement;cellular component organization;cellular component organization at ce…	binding;DNA binding;nucleic acid binding	cell part;chromosomal part;extracellular membrane-bounded organelle;extracellular organelle;extracellular region part;extracellular space;extracellular vesicular exosome;extrinsic to membrane;extrinsic to plasma membrane;intracellular membrane-bounded organelle;intracellular organelle;intracellular organelle part;intracellular part;macromolecular complex;membrane part;membrane-bounded organelle;m…	Systemic lupus erythematosus	7	7	7	47.6	47.6	47.6	13.92	214.64	11478000000	1160	15	5	6	6	7	6	7	6	7	7	7	5	6	6	7	6	7	6	7	7	7	5	6	6	7	6	7	6	7	7	7	120060000
B2RTL5;O35945	B2RTL5;O35945	Aldehyde dehydrogenase, cytosolic 1	Aldh1a7	alcohol catabolic process;alcohol metabolic process;catabolic process;ethanol catabolic process;ethanol metabolic process;metabolic process;primary alcohol catabolic process;primary alcohol metabolic process;small molecule catabolic process;small molecule metabolic process	3-chloroallyl aldehyde dehydrogenase activity;benzaldehyde dehydrogenase (NAD+) activity;catalytic activity;oxidoreductase activity;oxidoreductase activity, acting on the aldehyde or oxo group of donors;oxidoreductase activity, acting on the aldehyde or oxo group of donors, NAD or NADP as acceptor;retinal dehydrogenase activity	cell part;cytoplasm;intracellular part	Retinol metabolism	26	15	15	58.7	39.3	39.3	54.587	185.34	1200900000	341	2	17	18	17	19	23	18	18	21	18	21	8	8	9	10	13	9	9	11	9	11	8	8	9	10	13	9	9	11	9	11	74202000
B2RTM0;P62806	B2RTM0;P62806	Histone H4	Hist2h4;Hist1h4a	biological regulation;cellular component assembly;cellular component assembly at cellular level;cellular component organization;cellular component organization at cellular level;cellular component organization or biogenesis;cellular component organization or biogenesis at cellular level;cellular macromolecular complex assembly;cellular macromolecular complex subunit organization;cellular process;…	binding;DNA binding;nucleic acid binding	cell part;chromosomal part;chromosome;extracellular membrane-bounded organelle;extracellular organelle;extracellular region part;extracellular vesicular exosome;intracellular non-membrane-bounded organelle;intracellular organelle;intracellular organelle part;intracellular part;macromolecular complex;membrane;membrane-bounded organelle;membrane-bounded vesicle;non-membrane-bounded organelle;nuclea…	Systemic lupus erythematosus	10	10	10	54.4	54.4	54.4	11.367	289.22	26691000000	1528	2	6	7	7	7	7	7	7	10	8	8	6	7	7	7	7	7	7	10	8	8	6	7	7	7	7	7	7	10	8	8	299280000
B2RUK5;Q3ULD5	B2RUK5;Q3ULD5	Methylcrotonoyl-CoA carboxylase beta chain, mitochondrial	Mccc2	amine catabolic process;amine metabolic process;branched chain family amino acid catabolic process;branched chain family amino acid metabolic process;carboxylic acid catabolic process;carboxylic acid metabolic process;catabolic process;cellular amine metabolic process;cellular amino acid catabolic process;cellular amino acid metabolic process;cellular catabolic process;cellular ketone metabolic p…	adenyl nucleotide binding;adenyl ribonucleotide binding;ATP binding;binding;catalytic activity;CoA carboxylase activity;ligase activity;ligase activity, forming carbon-carbon bonds;methylcrotonoyl-CoA carboxylase activity;nucleotide binding;purine nucleotide binding;purine ribonucleoside triphosphate binding;purine ribonucleotide binding;ribonucleotide binding	cell part;cytoplasmic part;intracellular membrane-bounded organelle;intracellular organelle;intracellular organelle lumen;intracellular organelle part;intracellular part;membrane-bounded organelle;membrane-enclosed lumen;mitochondrial matrix;mitochondrial part;mitochondrion;organelle;organelle lumen;organelle part	Valine, leucine and isoleucine degradation	18	18	18	38	38	38	61.378	144.22	2784500000	579	2	11	15	14	15	16	15	14	17	16	16	11	15	14	15	16	15	14	17	16	16	11	15	14	15	16	15	14	17	16	16	166710000
B2RVP5;Q3THW5;P0C0S6;Q8R029;Q3UA95;G3UWL7	B2RVP5;Q3THW5;P0C0S6;Q8R029;Q3UA95	Histone H2A;Histone H2A.V;Histone H2A.Z	H2afv;H2afz	biological regulation;cellular process;cellular response to chemical stimulus;cellular response to endogenous stimulus;cellular response to estradiol stimulus;cellular response to estrogen stimulus;cellular response to hormone stimulus;cellular response to organic substance;cellular response to steroid hormone stimulus;cellular response to stimulus;developmental process;multicellular organismal d…	binding;chromatin binding;chromatin DNA binding;core promoter binding;core promoter proximal region DNA binding;core promoter proximal region sequence-specific DNA binding;core promoter sequence-specific DNA binding;DNA binding;enhancer binding;enhancer sequence-specific DNA binding;nucleic acid binding;nucleosomal DNA binding;nucleosome binding;regulatory region DNA binding;regulatory region nuc…	cell part;chromatin;chromosomal part;euchromatin;extracellular membrane-bounded organelle;extracellular organelle;extracellular region part;extracellular vesicular exosome;heterochromatin;intracellular membrane-bounded organelle;intracellular organelle;intracellular organelle part;intracellular part;macromolecular complex;membrane-bounded organelle;membrane-bounded vesicle;nuclear chromatin;nucle…	Systemic lupus erythematosus	5	3	3	53.9	41.4	41.4	13.509	78.738	565260000	97	6	2	4	3	4	4	5	4	5	5	5	0	2	1	2	2	3	2	3	3	3	0	2	1	2	2	3	2	3	3	3	0
B2RWI2;Q9EP89	B2RWI2;Q9EP89	Serine beta-lactamase-like protein LACTB, mitochondrial	Lactb		catalytic activity;hydrolase activity	cell part;cytoplasm;cytoplasmic part;intracellular membrane-bounded organelle;intracellular organelle;intracellular part;membrane-bounded organelle;mitochondrion;organelle		15	15	15	34.1	34.1	34.1	60.705	76.216	1090400000	255	2	10	11	10	8	13	13	12	10	9	7	10	11	10	8	13	13	12	10	9	7	10	11	10	8	13	13	12	10	9	7	102400000
B2RXM2;J3QNY1;A2AL12;Q8BG05;V9GX38	B2RXM2;J3QNY1;A2AL12;Q8BG05	Heterogeneous nuclear ribonucleoprotein A3	Gm6793;Gm9242;Hnrnpa3	cellular macromolecule metabolic process;cellular metabolic process;cellular nitrogen compound metabolic process;cellular process;macromolecule metabolic process;metabolic process;mRNA metabolic process;mRNA processing;nitrogen compound metabolic process;nucleic acid metabolic process;nucleobase-containing compound metabolic process;primary metabolic process;RNA metabolic process;RNA processing;R…	binding;nucleic acid binding;nucleotide binding;RNA binding	catalytic step 2 spliceosome;cell part;intracellular organelle part;intracellular part;macromolecular complex;nuclear part;organelle part;ribonucleoprotein complex;spliceosomal complex	Spliceosome	9	9	9	28.2	28.2	28.2	36.609	63.469	444620000	77	5	4	5	4	5	5	4	3	6	7	8	4	5	4	5	5	4	3	6	7	8	4	5	4	5	5	4	3	6	7	8	16916000
B2RXW1;P35492;F8WH73	B2RXW1;P35492	Histidine ammonia-lyase	Hal	amine catabolic process;amine metabolic process;biosynthetic process;carboxylic acid catabolic process;carboxylic acid metabolic process;catabolic process;cellular amine metabolic process;cellular amino acid catabolic process;cellular amino acid metabolic process;cellular catabolic process;cellular ketone metabolic process;cellular metabolic process;cellular nitrogen compound metabolic process;ce…	ammonia-lyase activity;carbon-nitrogen lyase activity;catalytic activity;histidine ammonia-lyase activity;lyase activity	cell part;cytoplasm;intracellular part	Histidine metabolism;Nitrogen metabolism	20	20	20	41.6	41.6	41.6	72.257	320.15	2634900000	561	3	9	7	6	8	13	12	8	18	12	18	9	7	6	8	13	12	8	18	12	18	9	7	6	8	13	12	8	18	12	18	81944000
B2RXY7;P48758;Q8K354	B2RXY7;P48758	Carbonyl reductase [NADPH] 1	Cbr1	catabolic process;cell differentiation;cellular catabolic process;cellular developmental process;cellular ketone metabolic process;cellular metabolic process;cellular process;coenzyme catabolic process;coenzyme metabolic process;cofactor catabolic process;cofactor metabolic process;cognition;developmental process;drug metabolic process;epithelial cell differentiation;fat-soluble vitamin catabolic…	15-hydroxyprostaglandin dehydrogenase (NADP+) activity;3-keto sterol reductase activity;binding;carbonyl reductase (NADPH) activity;catalytic activity;coenzyme binding;cofactor binding;NADP binding;NADPH binding;nucleotide binding;oxidoreductase activity;oxidoreductase activity, acting on CH-OH group of donors;oxidoreductase activity, acting on NADH or NADPH;oxidoreductase activity, acting on NAD…	cell part;cytoplasm;cytoplasmic part;cytosol;extracellular membrane-bounded organelle;extracellular organelle;extracellular region part;extracellular space;extracellular vesicular exosome;intracellular organelle part;intracellular part;membrane-bounded organelle;membrane-bounded vesicle;nuclear part;nucleoplasm;organelle;organelle part;vesicle	Arachidonic acid metabolism	13	13	13	51.3	51.3	51.3	30.641	74.712	1530700000	338	3	8	7	6	8	8	8	8	12	10	12	8	7	6	8	8	8	8	12	10	12	8	7	6	8	8	8	8	12	10	12	122220000
B6VGH4;P00186	B6VGH4;P00186	Cytochrome P450;Cytochrome P450 1A2	Cyp1a2	alkaloid metabolic process;anatomical structure development;benzene-containing compound metabolic process;biological regulation;biosynthetic process;carboxylic acid metabolic process;catabolic process;cellular aromatic compound metabolic process;cellular biosynthetic process;cellular catabolic process;cellular ketone metabolic process;cellular lipid metabolic process;cellular metabolic process;ce…	aromatase activity;binding;caffeine oxidase activity;catalytic activity;cation binding;demethylase activity;enzyme binding;heme binding;ion binding;iron ion binding;metal ion binding;monooxygenase activity;oxidoreductase activity;oxidoreductase activity, acting on CH or CH2 groups;oxidoreductase activity, acting on CH or CH2 groups, quinone or similar compound as acceptor;oxidoreductase activity,…	cell part;cytoplasmic part;endoplasmic reticulum membrane;endoplasmic reticulum part;intracellular membrane-bounded organelle;intracellular organelle;intracellular organelle part;intracellular part;membrane;membrane part;membrane-bounded organelle;organelle;organelle membrane;organelle part	Caffeine metabolism;Drug metabolism - cytochrome P450;Linoleic acid metabolism;Metabolism of xenobiotics by cytochrome P450;Retinol metabolism;Tryptophan metabolism	20	20	16	53	53	40.4	58.183	231.05	2249900000	452	2	14	16	15	17	18	13	14	13	13	9	14	16	15	17	18	13	14	13	13	9	11	12	11	13	14	9	10	9	10	6	258310000
B7ZCF1;O88685;A0A087WPH7;A2AGN7;F6Q2E3	B7ZCF1;O88685;A0A087WPH7;A2AGN7;F6Q2E3	26S protease regulatory subunit 6A	Psmc3	anatomical structure development;biological regulation;blastocyst development;catabolic process;cellular catabolic process;cellular macromolecule catabolic process;cellular macromolecule metabolic process;cellular metabolic process;cellular process;developmental process;ER-associated protein catabolic process;macromolecule catabolic process;macromolecule metabolic process;metabolic process;modifi…	adenyl nucleotide binding;adenyl ribonucleotide binding;ATP binding;binding;nucleotide binding;protein binding;purine nucleotide binding;purine ribonucleoside triphosphate binding;purine ribonucleotide binding;ribonucleotide binding;TBP-class protein binding;transcription factor binding	cell part;cytoplasmic mRNA processing body;cytoplasmic part;cytosolic part;cytosolic proteasome complex;intracellular membrane-bounded organelle;intracellular non-membrane-bounded organelle;intracellular organelle;intracellular organelle part;intracellular part;macromolecular complex;membrane;membrane-bounded organelle;non-membrane-bounded organelle;nuclear part;nuclear proteasome complex;nucleus…	Proteasome	6	6	6	16.9	16.9	16.9	50.395	15.288	140770000	33	5	3	1	1	3	4	3	5	5	1	3	3	1	1	3	4	3	5	5	1	3	3	1	1	3	4	3	5	5	1	3	9910700
B9EHN0;Q02053;P31254	B9EHN0;Q02053	Ubiquitin-like modifier-activating enzyme 1	Uba1	catabolic process;cellular catabolic process;cellular macromolecule catabolic process;cellular macromolecule metabolic process;cellular metabolic process;cellular process;cellular protein metabolic process;cellular response to stimulus;cellular response to stress;macromolecule catabolic process;macromolecule metabolic process;macromolecule modification;metabolic process;modification-dependent mac…	acid-amino acid ligase activity;adenyl nucleotide binding;adenyl ribonucleotide binding;ATP binding;binding;catalytic activity;ligase activity;ligase activity, forming carbon-nitrogen bonds;nucleotide binding;purine nucleotide binding;purine ribonucleoside triphosphate binding;purine ribonucleotide binding;ribonucleotide binding;small conjugating protein ligase activity;small protein activating e…	anchoring junction;cell junction;cell part;cell-cell junction;chromatin;chromosomal part;cytoplasm;cytoplasmic part;cytosol;desmosome;endoplasmic reticulum membrane;endoplasmic reticulum part;endosomal part;endosome membrane;extracellular membrane-bounded organelle;extracellular organelle;extracellular region part;extracellular vesicular exosome;heterochromatin;intracellular membrane-bounded orga…	Parkinson's disease;Ubiquitin mediated proteolysis	11	11	11	14	14	14	117.81	31.827	204130000	34	3	1	2	2	2	5	0	3	10	3	6	1	2	2	2	5	0	3	10	3	6	1	2	2	2	5	0	3	10	3	6	5340400
B9EHY2;Q80W54;I7HIP5	B9EHY2;Q80W54	CAAX prenyl protease 1 homolog	Zmpste24	CAAX-box protein processing;catabolic process;cellular catabolic process;cellular component organization;cellular component organization or biogenesis;cellular macromolecule catabolic process;cellular macromolecule metabolic process;cellular membrane organization;cellular metabolic process;cellular process;macromolecule catabolic process;macromolecule metabolic process;membrane organization;metab…	binding;catalytic activity;cation binding;endopeptidase activity;hydrolase activity;ion binding;metal ion binding;metalloendopeptidase activity;metallopeptidase activity;peptidase activity;peptidase activity, acting on L-amino acid peptides	cell part;cytoplasmic part;endoplasmic reticulum membrane;endoplasmic reticulum part;extracellular membrane-bounded organelle;extracellular organelle;extracellular region part;extracellular vesicular exosome;integral to membrane;intracellular organelle part;intracellular part;intrinsic to membrane;membrane;membrane part;membrane-bounded organelle;membrane-bounded vesicle;nuclear inner membrane;nu…		7	7	7	20.4	20.4	20.4	54.734	37.777	895410000	80	3	4	3	5	6	5	5	4	3	5	4	4	3	5	6	5	5	4	3	5	4	4	3	5	6	5	5	4	3	5	4	123710000
C5NSA7;Q8VCW3;P48776	C5NSA7;Q8VCW3;P48776	Tryptophan 2,3-dioxygenase	Tdo2	acetyl-CoA metabolic process;amine catabolic process;amine metabolic process;aromatic amino acid family catabolic process;aromatic amino acid family metabolic process;aromatic compound catabolic process;carboxylic acid catabolic process;carboxylic acid metabolic process;catabolic process;cellular amine metabolic process;cellular amino acid catabolic process;cellular amino acid metabolic process;c…	amine binding;amino acid binding;binding;carboxylic acid binding;catalytic activity;cation binding;dioxygenase activity;heme binding;ion binding;iron ion binding;metal ion binding;oxidoreductase activity;oxidoreductase activity, acting on single donors with incorporation of molecular oxygen;oxidoreductase activity, acting on single donors with incorporation of molecular oxygen, incorporation of t…		Tryptophan metabolism	12	12	12	37.2	37.2	37.2	45.842	74.833	393120000	115	3	6	9	5	5	7	3	4	9	7	5	6	9	5	5	7	3	4	9	7	5	6	9	5	5	7	3	4	9	7	5	48053000
D3YWT0;D3Z569;D3YTS1;Q9R0P6	D3YWT0;D3Z569;D3YTS1;Q9R0P6	Signal peptidase complex catalytic subunit SEC11;Signal peptidase complex catalytic subunit SEC11A	Sec11a	cellular macromolecule metabolic process;cellular metabolic process;cellular process;cellular protein metabolic process;macromolecule metabolic process;metabolic process;peptide metabolic process;primary metabolic process;protein maturation;protein metabolic process;protein processing;signal peptide processing	catalytic activity;hydrolase activity;peptidase activity;peptidase activity, acting on L-amino acid peptides;serine hydrolase activity;serine-type peptidase activity	cell part;cytoplasmic part;endoplasmic reticulum membrane;endoplasmic reticulum part;extracellular membrane-bounded organelle;extracellular organelle;extracellular region part;extracellular vesicular exosome;integral to membrane;intracellular organelle part;intracellular part;intrinsic to membrane;membrane;membrane part;membrane-bounded organelle;membrane-bounded vesicle;organelle;organelle membr…	Protein export	5	5	5	21.2	21.2	21.2	19.569	51.23	472190000	160	4	4	4	3	3	4	4	4	5	5	4	4	4	3	3	4	4	4	5	5	4	4	4	3	3	4	4	4	5	5	4	53381000
D3YU17;Q8VCM8	D3YU17;Q8VCM8	Nicalin	Ncln	biological regulation;regulation of biological process;regulation of cellular process;regulation of response to stimulus;regulation of signal transduction;regulation of signaling		cell part;cytoplasmic part;endoplasmic reticulum membrane;endoplasmic reticulum part;integral to membrane;intracellular organelle part;intracellular part;intrinsic to membrane;membrane;membrane part;organelle membrane;organelle part		6	6	6	11.6	11.6	11.6	62.779	11.251	165690000	34	2	2	3	5	3	6	4	2	1	3	2	2	3	5	3	6	4	2	1	3	2	2	3	5	3	6	4	2	1	3	2	27737000
D3YUM1;Q91YT0;D3Z1U9;D3Z0K1;D3YXX5;D6RG60	D3YUM1;Q91YT0;D3Z1U9	NADH dehydrogenase [ubiquinone] flavoprotein 1, mitochondrial	Ndufv1		4 iron, 4 sulfur cluster binding;binding;catalytic activity;cation binding;coenzyme binding;cofactor binding;FMN binding;ion binding;iron-sulfur cluster binding;metal cluster binding;metal ion binding;NAD binding;NADH dehydrogenase (quinone) activity;NADH dehydrogenase (ubiquinone) activity;NADH dehydrogenase activity;nucleotide binding;oxidoreductase activity;oxidoreductase activity, acting on N…	cell part;cytoplasmic part;intracellular membrane-bounded organelle;intracellular organelle;intracellular organelle part;intracellular part;macromolecular complex;membrane;membrane part;membrane-bounded organelle;mitochondrial inner membrane;mitochondrial membrane;mitochondrial membrane part;mitochondrial part;mitochondrial respiratory chain complex I;mitochondrion;NADH dehydrogenase complex;orga…	Alzheimer's disease;Huntington's disease;Oxidative phosphorylation;Parkinson's disease	25	25	25	67.7	67.7	67.7	49.913	141.42	5053300000	829	6	14	16	17	18	18	16	15	23	19	20	14	16	17	18	18	16	15	23	19	20	14	16	17	18	18	16	15	23	19	20	442750000
D3YVN7;Q8BFR5;A0A0U1RNQ6;A0A0U1RPC4	D3YVN7;Q8BFR5	Elongation factor Tu;Elongation factor Tu, mitochondrial	Gm9755;Tufm	biosynthetic process;cellular biosynthetic process;cellular macromolecule biosynthetic process;cellular macromolecule metabolic process;cellular metabolic process;cellular process;macromolecule biosynthetic process;macromolecule metabolic process;metabolic process;translational elongation	binding;catalytic activity;GTP binding;GTPase activity;guanyl nucleotide binding;guanyl ribonucleotide binding;hydrolase activity;hydrolase activity, acting on acid anhydrides;hydrolase activity, acting on acid anhydrides, in phosphorus-containing anhydrides;nucleic acid binding;nucleoside-triphosphatase activity;nucleotide binding;purine nucleotide binding;purine ribonucleoside triphosphate bind…	cell part;cytoplasmic part;extracellular membrane-bounded organelle;extracellular organelle;extracellular region part;extracellular vesicular exosome;intracellular;intracellular membrane-bounded organelle;intracellular non-membrane-bounded organelle;intracellular organelle;intracellular organelle part;intracellular part;membrane;membrane-bounded organelle;membrane-bounded vesicle;mitochondrial in…	Plant-pathogen interaction	12	12	12	29.9	29.9	29.9	49.538	47.272	811500000	183	4	8	10	10	7	8	6	5	11	11	9	8	10	10	7	8	6	5	11	11	9	8	10	10	7	8	6	5	11	11	9	56038000
D3YVV1;Q8VEK0;Q0VEI2;Q8BHG3	D3YVV1;Q8VEK0	Cell cycle control protein 50A	Tmem30a	biological regulation;cellular component organization;cellular component organization or biogenesis;cellular membrane organization;cellular process;drug transmembrane transport;drug transport;establishment of localization;lipid translocation;lipid transport;membrane organization;organic substance transport;phospholipid translocation;phospholipid transport;positive regulation of biological process…		apical plasma membrane;cell part;cytoplasmic part;cytoplasmic vesicle membrane;cytoplasmic vesicle part;endoplasmic reticulum;Golgi apparatus;integral to membrane;intracellular membrane-bounded organelle;intracellular organelle;intracellular organelle part;intracellular part;intrinsic to membrane;membrane;membrane part;membrane-bounded organelle;organelle;organelle membrane;organelle part;plasma …		6	6	6	22.3	22.3	22.3	37.178	12.614	585730000	127	4	4	3	4	4	5	5	5	2	3	2	4	3	4	4	5	5	5	2	3	2	4	3	4	4	5	5	5	2	3	2	72212000
D6RFN5;Q3TXT8;D3YW25;O70131	D6RFN5;Q3TXT8;D3YW25;O70131	Ninjurin-1	Ninj1	anatomical structure development;anatomical structure morphogenesis;biological adhesion;biological regulation;cell adhesion;cellular process;developmental growth;developmental process;growth;positive regulation of biological process;positive regulation of cell adhesion;positive regulation of cell-matrix adhesion;positive regulation of cell-substrate adhesion;positive regulation of cellular proces…		cell part;integral to membrane;intrinsic to membrane;membrane part		2	2	2	29.1	29.1	29.1	11.846	17.334	129900000	28	4	2	0	1	0	2	2	2	1	2	0	2	0	1	0	2	2	2	1	2	0	2	0	1	0	2	2	2	1	2	0	20930000
D3YYM6;Q91V55;P97461	D3YYM6;Q91V55;P97461	40S ribosomal protein S5;40S ribosomal protein S5, N-terminally processed	Rps5	biological regulation;biosynthetic process;cellular biosynthetic process;cellular macromolecule biosynthetic process;cellular macromolecule metabolic process;cellular metabolic process;cellular process;cellular protein metabolic process;macromolecule biosynthetic process;macromolecule metabolic process;metabolic process;posttranscriptional regulation of gene expression;primary metabolic process;p…	binding;mRNA binding;nucleic acid binding;RNA binding;structural constituent of ribosome;structural molecule activity	adherens junction;anchoring junction;cell junction;cell part;cell-substrate adherens junction;cell-substrate junction;cytosolic small ribosomal subunit;extracellular membrane-bounded organelle;extracellular organelle;extracellular region part;extracellular vesicular exosome;focal adhesion;intracellular organelle part;intracellular part;macromolecular complex;membrane;membrane-bounded organelle;me…	Ribosome	10	10	10	51.6	51.6	51.6	20.413	164.63	1016600000	344	3	2	4	5	5	6	5	3	9	7	8	2	4	5	5	6	5	3	9	7	8	2	4	5	5	6	5	3	9	7	8	34722000
E9Q3B9;D3YYS6;O35678;Q3UFN1	E9Q3B9;D3YYS6;O35678;Q3UFN1	Monoglyceride lipase	Mgll	acylglycerol catabolic process;acylglycerol metabolic process;arachidonic acid metabolic process;biological regulation;biosynthetic process;carboxylic acid biosynthetic process;carboxylic acid metabolic process;catabolic process;cellular biosynthetic process;cellular catabolic process;cellular ketone metabolic process;cellular lipid catabolic process;cellular lipid metabolic process;cellular meta…	acylglycerol lipase activity;binding;carboxylic ester hydrolase activity;catalytic activity;hydrolase activity;hydrolase activity, acting on ester bonds;identical protein binding;lipase activity;lipid binding;protein binding;protein dimerization activity;protein homodimerization activity	axon;axon part;cell part;cell projection;cell projection part;cytoplasmic part;cytosol;extrinsic to membrane;intracellular organelle part;intracellular part;membrane part;neuron projection;nuclear part;nucleoplasm;organelle part;synapse;varicosity	Glycerolipid metabolism	10	10	10	41.4	41.4	41.4	35.256	30.304	467910000	121	4	10	6	5	4	8	6	5	4	3	3	10	6	5	4	8	6	5	4	3	3	10	6	5	4	8	6	5	4	3	3	85847000
D3YZ54;Q9QXE0;E9PWM4;E9Q0K0;E9Q7H7;E9Q9L4;D6RDE9	D3YZ54;Q9QXE0;E9PWM4	2-hydroxyacyl-CoA lyase 1	Hacl1	carboxylic acid catabolic process;carboxylic acid metabolic process;catabolic process;cellular catabolic process;cellular component assembly;cellular component organization;cellular component organization or biogenesis;cellular ketone metabolic process;cellular lipid catabolic process;cellular lipid metabolic process;cellular metabolic process;cellular process;fatty acid alpha-oxidation;fatty aci…	binding;carbon-carbon lyase activity;catalytic activity;cation binding;coenzyme binding;cofactor binding;identical protein binding;ion binding;lyase activity;magnesium ion binding;metal ion binding;protein binding;receptor binding;thiamine pyrophosphate binding;vitamin binding	cell part;cytoplasmic part;intracellular membrane-bounded organelle;intracellular organelle;intracellular part;membrane-bounded organelle;microbody;organelle;peroxisome	Peroxisome	22	22	22	60.1	60.1	60.1	60.995	323.31	5842100000	1194	7	15	12	13	10	16	16	14	20	20	19	15	12	13	10	16	16	14	20	20	19	15	12	13	10	16	16	14	20	20	19	286670000
E9Q7G1;D3YZZ5	E9Q7G1;D3YZZ5		Tmed7	establishment of localization;transport		cell part;cytoplasmic part;endoplasmic reticulum;endoplasmic reticulum-Golgi intermediate compartment;extracellular membrane-bounded organelle;extracellular organelle;extracellular region part;extracellular vesicular exosome;Golgi apparatus;integral to membrane;intracellular membrane-bounded organelle;intracellular organelle;intracellular part;intrinsic to membrane;membrane part;membrane-bounded …		4	4	4	33	33	33	21.276	17.005	389650000	99	2	3	3	3	3	3	3	2	3	2	2	3	3	3	3	3	3	2	3	2	2	3	3	3	3	3	3	2	3	2	2	25340000
D3Z041;P41216;D3Z457;D3YVF6;F6WNZ2	D3Z041;P41216	Long-chain-fatty-acid--CoA ligase 1	Acsl1	acylglycerol metabolic process;adiponectin-mediated signaling pathway;biological regulation;biosynthetic process;carboxylic acid metabolic process;catabolic process;cell surface receptor linked signaling pathway;cellular catabolic process;cellular ketone metabolic process;cellular lipid metabolic process;cellular metabolic process;cellular process;cellular response to chemical stimulus;cellular r…	adenyl nucleotide binding;adenyl ribonucleotide binding;ATP binding;binding;catalytic activity;fatty acid ligase activity;ligase activity;ligase activity, forming carbon-sulfur bonds;long-chain fatty acid-CoA ligase activity;nucleotide binding;purine nucleotide binding;purine ribonucleoside triphosphate binding;purine ribonucleotide binding;ribonucleotide binding	cell part;cytoplasmic part;endoplasmic reticulum;endoplasmic reticulum membrane;endoplasmic reticulum part;integral to membrane;intracellular membrane-bounded organelle;intracellular organelle;intracellular organelle part;intracellular part;intrinsic to membrane;membrane;membrane part;membrane-bounded organelle;microbody;microbody membrane;microbody part;mitochondrial membrane;mitochondrial outer…	Adipocytokine signaling pathway;Fatty acid metabolism;Peroxisome;PPAR signaling pathway	37	37	34	57.7	57.7	53.6	78.034	323.31	32519000000	6148	5	33	31	33	32	34	32	33	33	32	32	33	31	33	32	34	32	33	33	32	32	31	28	30	29	32	30	31	30	29	29	3426500000
D3Z1M3;Q6ZQI3	D3Z1M3;Q6ZQI3	Malectin	Mlec	carbohydrate metabolic process;metabolic process;primary metabolic process	binding;carbohydrate binding;enzyme binding;protein binding	cell part;cytoplasmic part;endoplasmic reticulum;endoplasmic reticulum membrane;endoplasmic reticulum part;integral to membrane;intracellular membrane-bounded organelle;intracellular organelle;intracellular organelle part;intracellular part;intrinsic to membrane;membrane;membrane part;membrane-bounded organelle;organelle;organelle membrane;organelle part		7	7	7	27.8	27.8	27.8	32.342	29.138	535960000	127	2	4	7	7	7	3	5	6	3	6	4	4	7	7	7	3	5	6	3	6	4	4	7	7	7	3	5	6	3	6	4	39807000
D3Z2H7;E9Q986;D3Z7H6;E9Q906;E9Q907;E9Q905;E9Q8Z4;E9Q8Z9;D3Z2H2;E9Q903;E9Q901;E9Q904;G3X9V2;E9Q8Z5;E9Q8Z6;E9Q8Z8;P30999	D3Z2H7;E9Q986;D3Z7H6;E9Q906;E9Q907;E9Q905;E9Q8Z4;E9Q8Z9;D3Z2H2;E9Q903;E9Q901;E9Q904;G3X9V2;E9Q8Z5;E9Q8Z6;E9Q8Z8;P30999	Catenin delta-1	Ctnnd1	anatomical structure morphogenesis;biological adhesion;biological regulation;biosynthetic process;cell adhesion;cell differentiation;cell differentiation involved in salivary gland development;cell surface receptor linked signaling pathway;cell-cell adhesion;cellular biosynthetic process;cellular developmental process;cellular macromolecule biosynthetic process;cellular macromolecule metabolic pr…	binding;cadherin binding;cell adhesion molecule binding;enzyme binding;phosphatase binding;protein binding;protein domain specific binding;protein phosphatase binding;receptor binding	adherens junction;anchoring junction;cell junction;cell part;cell projection;cell-cell adherens junction;cell-cell junction;cytoplasm;cytoplasmic part;cytosol;extracellular membrane-bounded organelle;extracellular organelle;extracellular region part;extracellular vesicular exosome;intracellular membrane-bounded organelle;intracellular organelle;intracellular part;lamellipodium;membrane;membrane-b…	Adherens junction;Leukocyte transendothelial migration	7	7	7	14.3	14.3	14.3	67.935	28.55	94840000	20	17	1	3	1	1	1	2	3	6	4	1	1	3	1	1	1	2	3	6	4	1	1	3	1	1	1	2	3	6	4	1	2835300
D3Z2V4;Q4FK30;Q61009;F7C5U2	D3Z2V4;Q4FK30;Q61009	Scavenger receptor class B member 1	Scarb1	adhesion to host;adhesion to other organism involved in symbiotic interaction;alcohol metabolic process;androgen biosynthetic process;androgen metabolic process;biological adhesion;biological regulation;biosynthetic process;blood vessel endothelial cell migration;carbohydrate transport;catabolic process;cell adhesion;cell migration;cell motility;cell proliferation;cell recognition;cell surface re…	apolipoprotein A-I binding;apolipoprotein binding;binding;cargo receptor activity;high-density lipoprotein particle binding;high-density lipoprotein particle receptor activity;lipopolysaccharide binding;lipopolysaccharide receptor activity;lipoprotein particle binding;lipoprotein particle receptor activity;low-density lipoprotein particle binding;molecular transducer activity;pattern recognition …	caveola;cell part;cell projection membrane;cell projection part;cell surface;cytoplasmic part;extracellular membrane-bounded organelle;extracellular organelle;extracellular region part;extracellular vesicular exosome;integral to membrane;integral to plasma membrane;intracellular organelle part;intracellular part;intrinsic to membrane;intrinsic to plasma membrane;lysosomal membrane;membrane;membra…	Bile secretion;Fat digestion and absorption;Hepatitis C;Phagosome;Vitamin digestion and absorption	5	5	5	15.8	15.8	15.8	56.242	73.683	397020000	93	4	4	4	3	3	5	3	4	3	3	3	4	4	3	3	5	3	4	3	3	3	4	4	3	3	5	3	4	3	3	3	46444000
D3Z7C6;Q9R0Q7	D3Z7C6;Q9R0Q7	Prostaglandin E synthase 3	Ptges3	anatomical structure development;biological regulation;biosynthetic process;carbohydrate biosynthetic process;carbohydrate metabolic process;carboxylic acid biosynthetic process;carboxylic acid metabolic process;cell proliferation;cellular biosynthetic process;cellular carbohydrate biosynthetic process;cellular carbohydrate metabolic process;cellular glucan metabolic process;cellular ketone metab…	binding;catalytic activity;DNA polymerase activity;intramolecular oxidoreductase activity;isomerase activity;nucleotidyltransferase activity;prostaglandin-E synthase activity;protein binding;RNA-directed DNA polymerase activity;telomerase activity;transferase activity;transferase activity, transferring phosphorus-containing groups;unfolded protein binding	cell part;cytoplasm;extracellular membrane-bounded organelle;extracellular organelle;extracellular region part;extracellular vesicular exosome;intracellular membrane-bounded organelle;intracellular organelle;intracellular organelle part;intracellular part;macromolecular complex;membrane-bounded organelle;membrane-bounded vesicle;nuclear part;nucleoplasm;nucleus;organelle;organelle part;ribonucleo…		3	3	3	23.1	23.1	23.1	14.982	33.294	167970000	30	2	2	2	2	2	2	2	2	3	3	3	2	2	2	2	2	2	2	3	3	3	2	2	2	2	2	2	2	3	3	3	10155000
D6RGQ0;E9Q8H9;E9Q8I0;P06909;A0A0A6YVP8;A0A0A6YWP4	D6RGQ0;E9Q8H9;E9Q8I0;P06909;A0A0A6YVP8;A0A0A6YWP4	Complement factor H	Cfh	activation of immune response;biological regulation;complement activation;complement activation, alternative pathway;defense response;humoral immune response;immune effector process;immune response;immune system process;innate immune response;macromolecule metabolic process;metabolic process;positive regulation of biological process;positive regulation of immune response;positive regulation of im…	binding;carbohydrate binding;complement binding;complement component C3b binding;glycoprotein binding;glycosaminoglycan binding;heparan sulfate proteoglycan binding;heparin binding;opsonin binding;pattern binding;polysaccharide binding;protein binding;proteoglycan binding	blood microparticle;extracellular membrane-bounded organelle;extracellular organelle;extracellular region part;extracellular vesicular exosome;membrane-bounded organelle;membrane-bounded vesicle;organelle;vesicle	Complement and coagulation cascades;Staphylococcus aureus infection	5	5	4	4.9	4.9	3.2	125.05	4.1849	97892000	8	6	3	3	0	0	3	2	3	4	5	3	3	3	0	0	3	2	3	4	5	3	3	2	0	0	3	2	3	3	4	3	9391200
E0CX98;Q9D2C7;E0CZE8;E0CXR0	E0CX98;Q9D2C7;E0CZE8;E0CXR0	Bax inhibitor 1	Tmbim6	apoptosis;apoptosis in response to endoplasmic reticulum stress;biological regulation;calcium ion homeostasis;cation homeostasis;cell death;cellular calcium ion homeostasis;cellular cation homeostasis;cellular chemical homeostasis;cellular divalent inorganic cation homeostasis;cellular homeostasis;cellular ion homeostasis;cellular metal ion homeostasis;cellular process;cellular response to stimul…	binding;endoribonuclease inhibitor activity;enzyme binding;enzyme inhibitor activity;enzyme regulator activity;protein binding;ribonuclease inhibitor activity;ubiquitin protein ligase binding	cell part;cytoplasmic part;endoplasmic reticulum;endoplasmic reticulum membrane;endoplasmic reticulum part;integral to membrane;intracellular membrane-bounded organelle;intracellular organelle;intracellular organelle part;intracellular part;intrinsic to membrane;membrane;membrane part;membrane-bounded organelle;organelle;organelle membrane;organelle part		4	4	4	19.1	19.1	19.1	26.221	13.415	182420000	48	4	3	2	2	3	3	4	2	2	1	1	3	2	2	3	3	4	2	2	1	1	3	2	2	3	3	4	2	2	1	1	25363000
E0CXB5;F6TFF2;Q8R143	E0CXB5;F6TFF2;Q8R143	Pituitary tumor-transforming gene 1 protein-interacting protein	Pttg1ip	biological regulation;developmental process;establishment of localization;establishment of localization in cell;establishment of protein localization;intracellular protein transport;intracellular transport;multicellular organismal development;multicellular organismal process;negative regulation of biological process;negative regulation of cell communication;negative regulation of cellular process…	binding;p53 binding;protein binding;receptor activity	cell part;cytoplasm;extracellular membrane-bounded organelle;extracellular organelle;extracellular region part;extracellular vesicular exosome;integral to membrane;intracellular membrane-bounded organelle;intracellular organelle;intracellular part;intrinsic to membrane;membrane;membrane part;membrane-bounded organelle;membrane-bounded vesicle;nucleus;organelle;plasma membrane;vesicle		3	3	3	21.6	21.6	21.6	12.599	3.6068	269860000	52	3	3	3	3	3	3	3	2	1	1	2	3	3	3	3	3	3	2	1	1	2	3	3	3	3	3	3	2	1	1	2	31706000
E0CXN5;P13707	E0CXN5;P13707	Glycerol-3-phosphate dehydrogenase [NAD(+)];Glycerol-3-phosphate dehydrogenase [NAD(+)], cytoplasmic	Gpd1	alcohol biosynthetic process;alcohol catabolic process;alcohol metabolic process;alditol catabolic process;alditol metabolic process;biological regulation;biosynthetic process;carbohydrate biosynthetic process;carbohydrate catabolic process;carbohydrate metabolic process;catabolic process;cellular biosynthetic process;cellular carbohydrate biosynthetic process;cellular carbohydrate catabolic proc…	binding;catalytic activity;coenzyme binding;cofactor binding;glycerol-3-phosphate dehydrogenase [NAD+] activity;glycerol-3-phosphate dehydrogenase activity;NAD binding;nucleotide binding;oxidoreductase activity;oxidoreductase activity, acting on CH-OH group of donors;oxidoreductase activity, acting on the CH-OH group of donors, NAD or NADP as acceptor;oxidoreductase activity, acting on the CH-OH …	cell part;cytoplasmic part;cytosol;extracellular membrane-bounded organelle;extracellular organelle;extracellular region part;extracellular vesicular exosome;glycerol-3-phosphate dehydrogenase complex;intracellular membrane-bounded organelle;intracellular organelle;intracellular part;macromolecular complex;membrane-bounded organelle;membrane-bounded vesicle;mitochondrion;organelle;protein complex…	Glycerophospholipid metabolism	19	19	18	55.5	55.5	52.1	35.231	108.66	2542300000	536	2	12	13	14	13	11	12	15	16	15	18	12	13	14	13	11	12	15	16	15	18	11	12	13	12	10	11	14	15	14	17	231910000
E9PUL7;Q9JIZ0;G3UWY7;Q9JIY7;E0CYC6	E9PUL7;Q9JIZ0;G3UWY7	Probable N-acetyltransferase CML1	Cml1	amine metabolic process;anatomical structure morphogenesis;beta-amyloid metabolic process;biological regulation;carboxylic acid metabolic process;cellular amine metabolic process;cellular amino acid metabolic process;cellular ketone metabolic process;cellular macromolecule metabolic process;cellular metabolic process;cellular modified amino acid metabolic process;cellular nitrogen compound metabo…	acetyltransferase activity;catalytic activity;cysteine-S-conjugate N-acetyltransferase activity;lysine N-acetyltransferase activity;N-acetyltransferase activity;N-acyltransferase activity;transferase activity;transferase activity, transferring acyl groups;transferase activity, transferring acyl groups other than amino-acyl groups	cell part;cytoplasmic part;endoplasmic reticulum;endoplasmic reticulum membrane;endoplasmic reticulum part;endoplasmic reticulum-Golgi intermediate compartment;endoplasmic reticulum-Golgi intermediate compartment membrane;extracellular membrane-bounded organelle;extracellular organelle;extracellular region part;extracellular vesicular exosome;Golgi apparatus;integral to membrane;intracellular mem…		4	3	3	15.5	12.5	12.5	26.216	6.525	287330000	31	5	3	3	3	3	3	3	3	3	4	3	2	2	2	2	2	2	2	2	3	2	2	2	2	2	2	2	2	2	3	2	13320000
E9PV24	E9PV24	Fibrinogen alpha chain;Fibrinopeptide A;Fibrinogen alpha chain	Fga	antibacterial humoral response;antimicrobial humoral response;biological adhesion;biological regulation;blood coagulation;blood coagulation, common pathway;cell adhesion;cell-cell adhesion;cell-matrix adhesion;cell-substrate adhesion;cellular component assembly;cellular component assembly at cellular level;cellular component organization;cellular component organization at cellular level;cellular …	structural molecule activity	blood microparticle;cell cortex;cell part;cell surface;cytoplasmic membrane-bounded vesicle;cytoplasmic part;cytoplasmic vesicle;external side of plasma membrane;extracellular membrane-bounded organelle;extracellular organelle;extracellular region part;extracellular space;extracellular vesicular exosome;fibrinogen complex;intracellular membrane-bounded organelle;intracellular organelle;intracellu…	Complement and coagulation cascades	10	10	10	13.8	13.8	13.8	87.428	163.78	1040500000	220	1	6	7	5	6	9	9	8	5	8	5	6	7	5	6	9	9	8	5	8	5	6	7	5	6	9	9	8	5	8	5	89925000
E9Q175;E9Q3L1;E9PVU0;E9Q174;V9GXM4;V9GX76;Q64331	E9Q175;E9Q3L1;E9PVU0;E9Q174;V9GXM4;V9GX76;Q64331	Unconventional myosin-VI	Myo6	anatomical structure development;anatomical structure morphogenesis;auditory receptor cell differentiation;behavior;biological regulation;cell communication;cell differentiation;cell projection organization;cell-cell signaling;cellular component assembly;cellular component assembly at cellular level;cellular component organization;cellular component organization at cellular level;cellular compone…	actin binding;actin filament binding;adenyl nucleotide binding;adenyl ribonucleotide binding;ATP binding;binding;catalytic activity;cytoskeletal protein binding;hydrolase activity;hydrolase activity, acting on acid anhydrides;hydrolase activity, acting on acid anhydrides, in phosphorus-containing anhydrides;motor activity;nucleoside-triphosphatase activity;nucleotide binding;protein binding;purin…	apical part of cell;axon;brush border;cell body;cell part;cell projection;cell projection membrane;cell projection part;clathrin-coated endocytic vesicle;clathrin-coated vesicle;coated pit;coated vesicle;cytoplasm;cytoplasmic membrane-bounded vesicle;cytoplasmic part;cytoplasmic vesicle;cytoskeletal part;DNA-directed RNA polymerase II, holoenzyme;endocytic vesicle;extracellular membrane-bounded o…		4	4	4	3.8	3.8	3.8	144.77	12.433	89642000	28	7	1	2	1	2	4	1	3	2	1	1	1	2	1	2	4	1	3	2	1	1	1	2	1	2	4	1	3	2	1	1	5226900
E9PW43;Q9CQS8	E9PW43;Q9CQS8	Protein transport protein Sec61 subunit beta	Gm10320;Sec61b	catabolic process;cellular catabolic process;cellular macromolecule catabolic process;cellular macromolecule metabolic process;cellular metabolic process;cellular process;ER-associated protein catabolic process;establishment of localization;establishment of localization in cell;establishment of protein localization;intracellular protein transport;intracellular transport;macromolecule catabolic pr…	binding;epidermal growth factor binding;growth factor binding;hormone binding;protein binding;ribonucleoprotein binding;ribosome binding	cell part;cytoplasmic part;endoplasmic reticulum;endoplasmic reticulum part;integral to membrane;intracellular membrane-bounded organelle;intracellular organelle;intracellular organelle part;intracellular part;intrinsic to membrane;macromolecular complex;membrane;membrane part;membrane-bounded organelle;organelle;organelle part;protein complex;Sec61 translocon complex;translocon complex	Phagosome;Protein export;Protein processing in endoplasmic reticulum;Vibrio cholerae infection	2	2	2	18.6	18.6	18.6	11.788	29.043	511570000	91	2	2	2	2	2	2	2	2	2	2	2	2	2	2	2	2	2	2	2	2	2	2	2	2	2	2	2	2	2	2	2	20608000
E9PXG1;G5E8Z4;Q8VCS9;P31651	E9PXG1;G5E8Z4;Q8VCS9;P31651	Transporter;Sodium- and chloride-dependent betaine transporter	Slc6a12	biological regulation;cell volume homeostasis;cellular chemical homeostasis;cellular homeostasis;cellular hyperosmotic response;cellular process;cellular response to abiotic stimulus;cellular response to osmotic stress;cellular response to stimulus;cellular response to stress;cellular water homeostasis;chemical homeostasis;homeostatic process;hyperosmotic response;regulation of biological quality…	active transmembrane transporter activity;amine transmembrane transporter activity;amino acid transmembrane transporter activity;carboxylic acid transmembrane transporter activity;cation transmembrane transporter activity;cation:amino acid symporter activity;gamma-aminobutyric acid:sodium symporter activity;inorganic cation transmembrane transporter activity;ion transmembrane transporter activity…	cell part;integral to membrane;integral to plasma membrane;intrinsic to membrane;intrinsic to plasma membrane;membrane part;plasma membrane part		2	2	2	5.6	5.6	5.6	63.04	12.123	60332000	24	4	2	2	0	1	2	2	2	1	2	1	2	2	0	1	2	2	2	1	2	1	2	2	0	1	2	2	2	1	2	1	9388800
E9PYA3;G5E8T9;Q99KB8;A0A0R4J052;E9Q2H8;D3YWI0;D3YV58;D3YUX8	E9PYA3;G5E8T9;Q99KB8;A0A0R4J052;E9Q2H8	Hydroxyacylglutathione hydrolase, mitochondrial	Hagh	amine biosynthetic process;amine metabolic process;biosynthetic process;carboxylic acid biosynthetic process;carboxylic acid metabolic process;cellular amine metabolic process;cellular amino acid biosynthetic process;cellular amino acid metabolic process;cellular biosynthetic process;cellular ketone metabolic process;cellular metabolic process;cellular modified amino acid biosynthetic process;cel…	binding;catalytic activity;cation binding;hydrolase activity;hydrolase activity, acting on ester bonds;hydroxyacylglutathione hydrolase activity;ion binding;metal ion binding;thiolester hydrolase activity;transition metal ion binding;zinc ion binding	cell part;cytoplasm;cytoplasmic part;extracellular membrane-bounded organelle;extracellular organelle;extracellular region part;extracellular vesicular exosome;intracellular membrane-bounded organelle;intracellular organelle;intracellular organelle lumen;intracellular organelle part;intracellular part;membrane-bounded organelle;membrane-bounded vesicle;membrane-enclosed lumen;mitochondrial matrix…	Pyruvate metabolism	7	7	7	35.9	35.9	35.9	26	52.74	1608300000	268	8	6	7	5	6	7	7	7	7	7	7	6	7	5	6	7	7	7	7	7	7	6	7	5	6	7	7	7	7	7	7	141830000
E9PYH3;Q8BWU8	E9PYH3;Q8BWU8	Ethanolamine-phosphate phospho-lyase	Etnppl		binding;carbon-oxygen lyase activity;carbon-oxygen lyase activity, acting on phosphates;catalytic activity;cofactor binding;ethanolamine-phosphate phospho-lyase activity;lyase activity;pyridoxal phosphate binding;transaminase activity;transferase activity;transferase activity, transferring nitrogenous groups;vitamin B6 binding;vitamin binding	cell part;cytoplasmic part;intracellular membrane-bounded organelle;intracellular organelle;intracellular part;membrane-bounded organelle;mitochondrion;organelle		9	9	9	22.3	22.3	22.3	54.865	31.007	317510000	65	2	2	4	1	2	4	0	2	8	5	5	2	4	1	2	4	0	2	8	5	5	2	4	1	2	4	0	2	8	5	5	12393000
E9PYL9;Q9CXW4;E9PZB3;A2BH06	E9PYL9;Q9CXW4;E9PZB3;A2BH06	60S ribosomal protein L11	Gm10036;Rpl11;Gm5093	biosynthetic process;cellular biosynthetic process;cellular component biogenesis;cellular component biogenesis at cellular level;cellular component organization or biogenesis;cellular component organization or biogenesis at cellular level;cellular localization;cellular macromolecule biosynthetic process;cellular macromolecule localization;cellular macromolecule metabolic process;cellular metaboli…	binding;nucleic acid binding;RNA binding;rRNA binding;structural constituent of ribosome;structural molecule activity	cell part;cytoplasm;cytoplasmic part;cytosolic large ribosomal subunit;extracellular membrane-bounded organelle;extracellular organelle;extracellular region part;extracellular vesicular exosome;intracellular non-membrane-bounded organelle;intracellular organelle;intracellular organelle part;intracellular part;large ribosomal subunit;macromolecular complex;membrane;membrane-bounded organelle;membr…	Ribosome	7	7	7	33.1	33.1	33.1	20.266	76.312	1980900000	268	4	3	5	4	5	5	5	5	7	6	6	3	5	4	5	5	5	5	7	6	6	3	5	4	5	5	5	5	7	6	6	81628000
E9PYT3;Q91YH5	E9PYT3;Q91YH5	Atlastin-3	Atl3	cellular component assembly;cellular component organization;cellular component organization at cellular level;cellular component organization or biogenesis;cellular component organization or biogenesis at cellular level;cellular process;endoplasmic reticulum organization;Golgi organization;macromolecular complex assembly;macromolecular complex subunit organization;organelle organization;protein c…	binding;catalytic activity;GTP binding;GTPase activity;guanyl nucleotide binding;guanyl ribonucleotide binding;hydrolase activity;hydrolase activity, acting on acid anhydrides;hydrolase activity, acting on acid anhydrides, in phosphorus-containing anhydrides;identical protein binding;nucleoside-triphosphatase activity;nucleotide binding;protein binding;purine nucleotide binding;purine ribonucleos…	cell part;cytoplasmic part;endoplasmic reticulum;endoplasmic reticulum membrane;endoplasmic reticulum part;integral to membrane;intracellular membrane-bounded organelle;intracellular organelle;intracellular organelle part;intracellular part;intrinsic to membrane;membrane;membrane part;membrane-bounded organelle;organelle;organelle membrane;organelle part		7	7	7	14.9	14.9	14.9	60.231	24.942	248200000	41	2	3	3	0	0	5	5	4	6	6	3	3	3	0	0	5	5	4	6	6	3	3	3	0	0	5	5	4	6	6	3	15701000
E9PZ00;Q8BFQ1;K3W4L3;Q3UFE8;J3QPG5;Q61207	E9PZ00;Q8BFQ1;K3W4L3;Q3UFE8;J3QPG5;Q61207	Prosaposin	Psap	biological regulation;cAMP-mediated signaling;cell differentiation;cell surface receptor linked signaling pathway;cellular developmental process;cellular lipid metabolic process;cellular metabolic process;cellular process;cellular process involved in reproduction;cellular response to chemical stimulus;cellular response to organic substance;cellular response to stimulus;cyclic-nucleotide-mediated …	binding;G-protein-coupled receptor binding;protein binding;receptor binding	cell part;cytoplasmic part;extracellular membrane-bounded organelle;extracellular organelle;extracellular region part;extracellular space;extracellular vesicular exosome;Golgi apparatus;intracellular membrane-bounded organelle;intracellular non-membrane-bounded organelle;intracellular organelle;intracellular organelle part;intracellular part;lysosome;lytic vacuole;membrane-bounded organelle;membr…	Lysosome	9	9	9	18.1	18.1	18.1	60.672	22.211	1482400000	296	6	9	8	9	9	8	8	8	7	8	8	9	8	9	9	8	8	8	7	8	8	9	8	9	9	8	8	8	7	8	8	137460000
Q3U6G1;E9PZC3;Q923D2;A0A0U1RPU7;E9PZC4	Q3U6G1;E9PZC3;Q923D2;A0A0U1RPU7	Flavin reductase (NADPH)	Blvrb	catabolic process;cellular catabolic process;cellular metabolic process;cellular nitrogen compound catabolic process;cellular nitrogen compound metabolic process;cellular process;cofactor catabolic process;cofactor metabolic process;heme catabolic process;heme metabolic process;heterocycle catabolic process;heterocycle metabolic process;metabolic process;nitrogen compound metabolic process;oxidat…	biliverdin reductase activity;catalytic activity;flavin reductase activity;oxidoreductase activity;oxidoreductase activity, acting on the CH-CH group of donors;oxidoreductase activity, acting on the CH-CH group of donors, NAD or NADP as acceptor;oxidoreductase activity, acting on the CH-NH group of donors;oxidoreductase activity, acting on the CH-NH group of donors, NAD or NADP as acceptor	cell part;cytoplasm;cytoplasmic part;cytosol;extracellular membrane-bounded organelle;extracellular organelle;extracellular region part;extracellular vesicular exosome;intracellular organelle part;intracellular part;membrane;membrane-bounded organelle;membrane-bounded vesicle;nuclear part;nucleoplasm;organelle;organelle part;plasma membrane;vesicle	Porphyrin and chlorophyll metabolism;Riboflavin metabolism	5	5	5	31.6	31.6	31.6	22.197	40.653	431330000	100	5	2	4	4	5	4	1	2	3	5	4	2	4	4	5	4	1	2	3	5	4	2	4	4	5	4	1	2	3	5	4	18244000
G3X9T8;G3X8Q5;E9PZD8;Q61147;G3UZ53;G3UWP5;CON__ENSEMBL:ENSBTAP00000031900	G3X9T8;G3X8Q5;E9PZD8;Q61147	Ceruloplasmin	Cp	biological regulation;cation homeostasis;cation transport;cellular cation homeostasis;cellular chemical homeostasis;cellular homeostasis;cellular ion homeostasis;cellular iron ion homeostasis;cellular metal ion homeostasis;cellular process;chemical homeostasis;copper ion transport;establishment of localization;homeostatic process;ion homeostasis;ion transport;iron ion homeostasis;metabolic proces…	binding;catalytic activity;cation binding;chaperone binding;copper ion binding;ferroxidase activity;ion binding;metal ion binding;oxidoreductase activity;oxidoreductase activity, oxidizing metal ions;oxidoreductase activity, oxidizing metal ions, oxygen as acceptor;protein binding;transition metal ion binding	blood microparticle;cell part;cytoplasmic part;extracellular membrane-bounded organelle;extracellular organelle;extracellular region part;extracellular space;extracellular vesicular exosome;intracellular organelle part;intracellular part;lysosomal membrane;membrane;membrane-bounded organelle;membrane-bounded vesicle;organelle;organelle membrane;organelle part;vacuolar membrane;vacuolar part;vesic…	Porphyrin and chlorophyll metabolism	8	8	8	8.8	8.8	8.8	121.08	25.229	232210000	49	7	6	2	1	2	4	2	5	1	6	1	6	2	1	2	4	2	5	1	6	1	6	2	1	2	4	2	5	1	6	1	34058000
E9PZF0;Q5NC82;Q01768;Q5NC79	E9PZF0;Q5NC82;Q01768	Nucleoside diphosphate kinase;Nucleoside diphosphate kinase B	Gm20390;Nme2	anatomical structure development;biological regulation;biosynthetic process;body fluid secretion;catabolic process;cell surface receptor linked signaling pathway;cellular biosynthetic process;cellular catabolic process;cellular macromolecule catabolic process;cellular macromolecule metabolic process;cellular metabolic process;cellular nitrogen compound biosynthetic process;cellular nitrogen compo…	adenyl nucleotide binding;adenyl ribonucleotide binding;ATP binding;binding;catalytic activity;cation binding;deoxyribonuclease activity;GTP binding;guanyl nucleotide binding;guanyl ribonucleotide binding;hydrolase activity;hydrolase activity, acting on ester bonds;identical protein binding;ion binding;kinase activity;magnesium ion binding;metal ion binding;nuclease activity;nucleobase-containing…	cell part;cell periphery;cell projection;cell projection membrane;cell projection part;cytoplasm;cytoplasmic part;cytosol;extracellular membrane-bounded organelle;extracellular organelle;extracellular region part;extracellular vesicular exosome;intracellular membrane-bounded organelle;intracellular organelle;intracellular part;lamellipodium;leading edge membrane;membrane;membrane part;membrane-bo…	Purine metabolism;Pyrimidine metabolism	16	16	6	77.5	77.5	25.1	30.2	171.91	1244900000	198	4	11	9	8	10	13	10	11	13	11	12	11	9	8	10	13	10	11	13	11	12	5	4	3	4	5	5	4	5	5	6	87386000
E9Q035;F7BAE9;P47758;E9Q2Q7;D3YYR8;F7CJN9;E9Q939;CON__Q2HJF0	E9Q035		Gm20425	biological regulation;cation transport;cellular process;cellular response to stimulus;establishment of localization;intracellular signal transduction;ion transport;iron ion transport;metal ion transport;regulation of biological process;regulation of cellular process;response to stimulus;signal transduction;SMAD protein signal transduction;small GTPase mediated signal transduction;transition metal…	binding;GTP binding;guanyl nucleotide binding;guanyl ribonucleotide binding;nucleotide binding;purine nucleotide binding;purine ribonucleoside triphosphate binding;purine ribonucleotide binding;ribonucleotide binding	apical plasma membrane;basal part of cell;basal plasma membrane;blood microparticle;cell part;cell surface;coated pit;cytoplasm;cytoplasmic membrane-bounded vesicle;cytoplasmic microtubule;cytoplasmic part;cytoplasmic vesicle;cytoplasmic vesicle part;cytoskeletal part;early endosome;endocytic vesicle;endoplasmic reticulum membrane;endoplasmic reticulum part;endosome;extracellular membrane-bounded…	Protein export	43	43	10	49.3	49.3	12.8	107.8	323.31	853360000	107	8	28	27	27	29	32	31	30	34	39	34	28	27	27	29	32	31	30	34	39	34	8	6	9	8	9	7	9	5	8	6	84600000
F6ZTG3;E9Q197;Q9CPV4	F6ZTG3;E9Q197;Q9CPV4	Glyoxalase domain-containing protein 4	Glod4			cell part;cytoplasmic part;extracellular membrane-bounded organelle;extracellular organelle;extracellular region part;extracellular vesicular exosome;intracellular membrane-bounded organelle;intracellular organelle;intracellular part;membrane-bounded organelle;membrane-bounded vesicle;mitochondrion;organelle;vesicle		4	4	4	15.1	15.1	15.1	23.581	2.2433	138180000	12	3	2	2	1	1	4	3	1	2	1	3	2	2	1	1	4	3	1	2	1	3	2	2	1	1	4	3	1	2	1	3	5577000
E9Q1S3;Q01405;A2AN97	E9Q1S3;Q01405	Protein transport protein Sec23A	Sec23a	cellular process;ER to Golgi vesicle-mediated transport;establishment of localization;establishment of localization in cell;establishment of protein localization;Golgi vesicle transport;intracellular protein transport;intracellular transport;protein transport;transport;vesicle-mediated transport	binding;cation binding;ion binding;metal ion binding;transition metal ion binding;zinc ion binding	cell part;coated vesicle;COPII vesicle coat;cytoplasmic membrane-bounded vesicle;cytoplasmic part;cytoplasmic vesicle;cytoplasmic vesicle part;endomembrane system;endoplasmic reticulum membrane;endoplasmic reticulum part;ER to Golgi transport vesicle;Golgi apparatus part;Golgi membrane;intracellular membrane-bounded organelle;intracellular organelle;intracellular organelle part;intracellular part…	Protein processing in endoplasmic reticulum	15	15	13	27.2	27.2	23.9	82.955	167.83	515730000	171	3	9	7	6	5	9	7	6	13	9	9	9	7	6	5	9	7	6	13	9	9	8	6	5	4	7	6	5	11	7	9	49095000
E9Q1Y3;E9Q414;E9Q4G4	E9Q1Y3;E9Q414	Apolipoprotein B-100;Apolipoprotein B-48	Apob	acylglycerol catabolic process;acylglycerol metabolic process;alcohol metabolic process;anatomical structure development;anatomical structure morphogenesis;artery morphogenesis;biological regulation;biosynthetic process;blood vessel morphogenesis;catabolic process;cell motility;cellular biosynthetic process;cellular catabolic process;cellular component movement;cellular component organization;cel…	binding;carbohydrate binding;cholesterol transporter activity;enzyme binding;glycosaminoglycan binding;heparin binding;lipase binding;lipid binding;lipid transporter activity;lipoprotein particle receptor binding;low-density lipoprotein particle receptor binding;pattern binding;phospholipid binding;polysaccharide binding;protein binding;receptor binding;sterol transporter activity;substrate-speci…	actin cytoskeleton;cell body;cell part;chylomicron;cytoplasm;cytoplasmic part;cytoskeleton;endoplasmic reticulum;extracellular membrane-bounded organelle;extracellular organelle;extracellular region;extracellular region part;extracellular vesicular exosome;Golgi apparatus;intermediate-density lipoprotein particle;intracellular membrane-bounded organelle;intracellular non-membrane-bounded organell…	Fat digestion and absorption;Vitamin digestion and absorption	27	27	27	7	7	7	503.9	44.719	458280000	81	3	12	11	6	3	16	9	12	20	12	9	12	11	6	3	16	9	12	20	12	9	12	11	6	3	16	9	12	20	12	9	62050000
E9Q2T3;O35452	E9Q2T3;O35452		Tnxb	acylglycerol metabolic process;biological adhesion;biological regulation;carboxylic acid metabolic process;cell adhesion;cell-cell adhesion;cell-matrix adhesion;cell-substrate adhesion;cellular component assembly;cellular component assembly at cellular level;cellular component organization;cellular component organization at cellular level;cellular component organization or biogenesis;cellular com…	binding;carbohydrate binding;collagen binding;glycosaminoglycan binding;heparin binding;pattern binding;polysaccharide binding;protein binding	cell part;collagen;extracellular matrix;extracellular matrix part;extracellular membrane-bounded organelle;extracellular organelle;extracellular region;extracellular region part;extracellular space;extracellular vesicular exosome;fibrillar collagen;intracellular;membrane-bounded organelle;membrane-bounded vesicle;organelle;proteinaceous extracellular matrix;vesicle	ECM-receptor interaction;Focal adhesion	4	4	4	2.5	2.5	2.5	339.9	3.0865	241520000	11	2	3	1	0	1	2	2	3	2	2	1	3	1	0	1	2	2	3	2	2	1	3	1	0	1	2	2	3	2	2	1	37648000
E9Q4G8;E9Q3Q6;Q54AJ5;Q61490;F6QH25;Q5MPX5	E9Q4G8;E9Q3Q6;Q54AJ5;Q61490	CD166 antigen	Alcam	axon guidance;biological adhesion;cell adhesion;cellular process;chemotaxis;locomotion;motor axon guidance;response to chemical stimulus;response to external stimulus;response to stimulus;taxis		adherens junction;anchoring junction;axon;cell body;cell junction;cell part;cell projection;cell-substrate adherens junction;cell-substrate junction;external side of plasma membrane;extracellular membrane-bounded organelle;extracellular organelle;extracellular region part;extracellular vesicular exosome;focal adhesion;integral to membrane;intrinsic to membrane;membrane part;membrane-bounded organ…	Cell adhesion molecules (CAMs)	7	7	7	13.5	13.5	13.5	61.9	10.833	279540000	40	6	5	2	1	2	7	5	7	1	3	2	5	2	1	2	7	5	7	1	3	2	5	2	1	2	7	5	7	1	3	2	29804000
E9Q3W4;Q9QXS1;F6R059;E9PW24;A0A0R4J223;E9Q9J6;A0A0R4J221;A0A0R4J218	E9Q3W4;Q9QXS1	Plectin	Plec	cell junction assembly;cell junction organization;cell-substrate junction assembly;cellular component assembly;cellular component assembly at cellular level;cellular component organization;cellular component organization at cellular level;cellular component organization or biogenesis;cellular component organization or biogenesis at cellular level;cellular process;hemidesmosome assembly	ankyrin binding;binding;cytoskeletal protein binding;protein binding;structural constituent of muscle;structural molecule activity	adherens junction;anchoring junction;brush border;cell junction;cell part;cell projection;cell-substrate adherens junction;cell-substrate junction;contractile fiber;cytoplasm;cytoplasmic part;cytoskeleton;extracellular membrane-bounded organelle;extracellular organelle;extracellular region part;extracellular vesicular exosome;focal adhesion;hemidesmosome;intermediate filament cytoskeleton;intrace…		24	24	23	6	6	5.2	499.1	41.211	515190000	89	8	10	11	12	13	15	8	13	11	8	9	10	11	12	13	15	8	13	11	8	9	10	10	12	12	15	8	13	10	7	8	33472000
E9Q3X0;Q9EQK5;D3Z2N7	E9Q3X0;Q9EQK5	Major vault protein	Mvp	biological regulation;cell proliferation;macromolecule metabolic process;metabolic process;negative regulation of biological process;negative regulation of catalytic activity;negative regulation of cellular metabolic process;negative regulation of cellular process;negative regulation of cellular protein metabolic process;negative regulation of kinase activity;negative regulation of macromolecule …	binding;enzyme binding;kinase binding;phosphatase binding;protein binding;protein kinase binding;protein phosphatase binding	cell part;cytoplasm;cytoplasmic part;cytoskeleton;extracellular membrane-bounded organelle;extracellular organelle;extracellular region part;extracellular vesicular exosome;intracellular membrane-bounded organelle;intracellular non-membrane-bounded organelle;intracellular organelle;intracellular part;macromolecular complex;membrane;membrane-bounded organelle;membrane-bounded vesicle;non-membrane-…		11	11	11	13.2	13.2	13.2	96.856	18.154	517910000	71	3	4	4	3	3	7	6	6	11	7	9	4	4	3	3	7	6	6	11	7	9	4	4	3	3	7	6	6	11	7	9	17733000
E9Q509;G3X925;P53657;D3Z2C4;P52480	E9Q509;G3X925;P53657	Pyruvate kinase;Pyruvate kinase PKLR	Pklr	alcohol catabolic process;alcohol metabolic process;anatomical structure development;ATP biosynthetic process;ATP metabolic process;biosynthetic process;carbohydrate catabolic process;carbohydrate metabolic process;carboxylic acid biosynthetic process;carboxylic acid metabolic process;catabolic process;cell death;cellular biosynthetic process;cellular carbohydrate catabolic process;cellular carbo…	adenyl nucleotide binding;adenyl ribonucleotide binding;alkali metal ion binding;antigen binding;ATP binding;binding;catalytic activity;cation binding;ion binding;kinase activity;magnesium ion binding;metal ion binding;MHC class II protein complex binding;MHC protein complex binding;nucleotide binding;phosphotransferase activity, alcohol group as acceptor;potassium ion binding;purine nucleotide b…	cell part;cell projection;cilium;cytoplasm;cytoplasmic part;cytosol;extracellular matrix;extracellular membrane-bounded organelle;extracellular organelle;extracellular region part;extracellular vesicular exosome;intracellular membrane-bounded organelle;intracellular organelle;intracellular part;membrane;membrane-bounded organelle;membrane-bounded vesicle;mitochondrion;myelin sheath;nucleus;organe…	Carbon fixation in photosynthetic organisms;Glycolysis / Gluconeogenesis;Insulin signaling pathway;Maturity onset diabetes of the young;Purine metabolism;Pyruvate metabolism;Type II diabetes mellitus	14	14	14	33.3	33.3	33.3	58.82	55.514	617290000	139	5	9	7	4	8	11	9	8	11	9	12	9	7	4	8	11	9	8	11	9	12	9	7	4	8	11	9	8	11	9	12	34935000
E9QNH6;E9Q580;Q7TQD7;P46735;D3YV80;E9PVB9;A0A0J9YUC4;E9PWM9;Q9D6A1;O88329	E9QNH6;E9Q580;Q7TQD7;P46735	Unconventional myosin-Ib	Myo1b	actin cytoskeleton organization;actin filament bundle assembly;actin filament organization;actin filament-based movement;actin filament-based process;cell projection assembly;cell projection organization;cellular component assembly;cellular component assembly at cellular level;cellular component movement;cellular component organization;cellular component organization at cellular level;cellular co…	actin binding;actin filament binding;adenyl nucleotide binding;adenyl ribonucleotide binding;ATP binding;binding;catalytic activity;cytoskeletal protein binding;hydrolase activity;hydrolase activity, acting on acid anhydrides;hydrolase activity, acting on acid anhydrides, in phosphorus-containing anhydrides;lipid binding;microfilament motor activity;motor activity;nucleoside-triphosphatase activi…	actin filament;apical plasma membrane;basal plasma membrane;basolateral plasma membrane;brush border;cell cortex part;cell part;cell periphery;cell projection;cortical actin cytoskeleton;cortical cytoskeleton;cytoplasm;cytoplasmic part;cytoskeletal part;cytoskeleton;early endosome;endosomal part;endosome;endosome membrane;extracellular membrane-bounded organelle;extracellular organelle;extracellu…		18	18	18	19.7	19.7	19.7	125.03	44.318	1236100000	122	10	13	6	8	6	18	11	8	5	7	4	13	6	8	6	18	11	8	5	7	4	13	6	8	6	18	11	8	5	7	4	179870000
E9Q5B2;Q9DCS2;G5E8X1	E9Q5B2;Q9DCS2;G5E8X1	UPF0585 protein C16orf13 homolog	0610011F06Rik					2	2	2	25.2	25.2	25.2	12.037	8.3733	114270000	48	3	2	2	2	2	2	2	1	2	1	2	2	2	2	2	2	2	1	2	1	2	2	2	2	2	2	2	1	2	1	2	5834400
E9Q5B6;F6ZV59;G5E8G0;G3X9W0;Q60668;A0A0G2JFL4;F6SHF3;F6VQH5;D3YTQ3;Q9D3U4;Q9Z130	E9Q5B6;F6ZV59;G5E8G0;G3X9W0;Q60668	Heterogeneous nuclear ribonucleoprotein D0	Hnrnpd	biological regulation;biosynthetic process;cellular biosynthetic process;cellular macromolecule biosynthetic process;cellular macromolecule metabolic process;cellular metabolic process;cellular nitrogen compound metabolic process;cellular process;macromolecule biosynthetic process;macromolecule metabolic process;metabolic process;mRNA metabolic process;nitrogen compound metabolic process;nucleic …	binding;DNA binding;double-stranded DNA binding;mRNA binding;nucleic acid binding;nucleotide binding;poly(A) RNA binding;poly(G) RNA binding;poly-purine tract binding;RNA binding;sequence-specific DNA binding;single-stranded DNA binding;single-stranded RNA binding;structure-specific DNA binding;telomeric DNA binding	cell part;cytoplasm;extracellular membrane-bounded organelle;extracellular organelle;extracellular region part;extracellular vesicular exosome;intracellular membrane-bounded organelle;intracellular organelle;intracellular organelle part;intracellular part;macromolecular complex;membrane-bounded organelle;membrane-bounded vesicle;nuclear part;nucleoplasm;nucleus;organelle;organelle part;ribonucleo…		4	4	4	41.1	41.1	41.1	12.139	9.2308	164890000	38	11	0	3	4	0	2	3	1	4	3	3	0	3	4	0	2	3	1	4	3	3	0	3	4	0	2	3	1	4	3	3	0
E9Q5K4	E9Q5K4		Cyp2c44	arachidonic acid metabolic process;carboxylic acid metabolic process;catabolic process;cellular catabolic process;cellular ketone metabolic process;cellular lipid metabolic process;cellular metabolic process;cellular process;drug catabolic process;drug metabolic process;epoxygenase P450 pathway;exogenous drug catabolic process;fatty acid metabolic process;icosanoid metabolic process;lipid metabol…	arachidonic acid epoxygenase activity;arachidonic acid monooxygenase activity;binding;catalytic activity;cation binding;heme binding;ion binding;iron ion binding;metal ion binding;monooxygenase activity;oxidoreductase activity;oxidoreductase activity, acting on paired donors, with incorporation or reduction of molecular oxygen;oxidoreductase activity, acting on paired donors, with incorporation o…	cell part;cytoplasm;intracellular membrane-bounded organelle;intracellular organelle;intracellular part;membrane-bounded organelle;organelle	Arachidonic acid metabolism;Drug metabolism - cytochrome P450;Linoleic acid metabolism;Metabolism of xenobiotics by cytochrome P450;Retinol metabolism	16	15	15	36.8	35.4	35.4	56.421	100.63	323230000	80	1	5	3	4	3	9	2	6	11	3	6	4	2	3	2	8	1	5	10	2	5	4	2	3	2	8	1	5	10	2	5	17903000
E9Q5L3;Q9DBL1;A0A140LHL4	E9Q5L3;Q9DBL1	Short/branched chain specific acyl-CoA dehydrogenase, mitochondrial	Acadsb	acyl-CoA metabolic process;carboxylic acid metabolic process;cellular ketone metabolic process;cellular lipid metabolic process;cellular metabolic process;cellular process;coenzyme metabolic process;cofactor metabolic process;fatty acid metabolic process;lipid metabolic process;metabolic process;monocarboxylic acid metabolic process;organic acid metabolic process;oxoacid metabolic process;primary…	acyl-CoA dehydrogenase activity;binding;catalytic activity;coenzyme binding;cofactor binding;flavin adenine dinucleotide binding;oxidoreductase activity;oxidoreductase activity, acting on the CH-CH group of donors;short-branched-chain-acyl-CoA dehydrogenase activity	cell part;cytoplasmic part;extracellular membrane-bounded organelle;extracellular organelle;extracellular region part;extracellular vesicular exosome;intracellular membrane-bounded organelle;intracellular organelle;intracellular organelle lumen;intracellular organelle part;intracellular part;membrane-bounded organelle;membrane-bounded vesicle;membrane-enclosed lumen;mitochondrial matrix;mitochond…	Fatty acid metabolism;Valine, leucine and isoleucine degradation	8	8	8	22.6	22.6	22.6	51.853	68.219	393070000	94	3	3	5	4	7	4	2	5	6	7	6	3	5	4	7	4	2	5	6	7	6	3	5	4	7	4	2	5	6	7	6	16326000
Q5M8Q0;E9QAZ2;Q9CZM2;B8JKK2	Q5M8Q0;E9QAZ2;Q9CZM2	Ribosomal protein L15;60S ribosomal protein L15	Rpl15;Gm10020	biosynthetic process;cellular biosynthetic process;cellular macromolecule biosynthetic process;cellular macromolecule metabolic process;cellular metabolic process;cellular process;cellular protein metabolic process;macromolecule biosynthetic process;macromolecule metabolic process;metabolic process;primary metabolic process;protein metabolic process;translation	structural constituent of ribosome;structural molecule activity	cell part;cytoplasmic part;cytosolic large ribosomal subunit;extracellular membrane-bounded organelle;extracellular organelle;extracellular region part;extracellular vesicular exosome;intracellular membrane-bounded organelle;intracellular non-membrane-bounded organelle;intracellular organelle;intracellular organelle part;intracellular part;large ribosomal subunit;macromolecular complex;membrane-b…	Ribosome	8	8	8	43.1	43.1	43.1	24.146	67.174	1524200000	282	4	5	4	4	4	7	6	4	7	6	5	5	4	4	4	7	6	4	7	6	5	5	4	4	4	7	6	4	7	6	5	95641000
Q53ZD4;E9QJW0;Q91VS7;D3YU60;A0A0N4SV17;D3YVR3;A0A0N4SVZ0	Q53ZD4;E9QJW0;Q91VS7;D3YU60	Microsomal glutathione S-transferase 1	Mgst1	amine metabolic process;carboxylic acid metabolic process;cell differentiation;cellular amine metabolic process;cellular amino acid metabolic process;cellular component assembly;cellular component organization;cellular component organization or biogenesis;cellular developmental process;cellular ketone metabolic process;cellular metabolic process;cellular modified amino acid metabolic process;cell…	amine binding;amino acid binding;antioxidant activity;binding;carboxylic acid binding;catalytic activity;glutathione binding;glutathione peroxidase activity;glutathione transferase activity;modified amino acid binding;oxidoreductase activity;oxidoreductase activity, acting on peroxide as acceptor;peptide binding;peroxidase activity;transferase activity;transferase activity, transferring alkyl or …	apical part of cell;cell part;cytoplasmic part;endoplasmic reticulum;endoplasmic reticulum membrane;endoplasmic reticulum part;integral to membrane;intracellular membrane-bounded organelle;intracellular organelle;intracellular organelle part;intracellular part;intrinsic to membrane;membrane;membrane part;membrane-bounded organelle;microbody;microbody membrane;microbody part;mitochondrial inner me…	Drug metabolism - cytochrome P450;Glutathione metabolism;Metabolism of xenobiotics by cytochrome P450	7	7	7	65.8	65.8	65.8	17.551	323.31	19924000000	1824	7	5	6	6	5	7	7	5	7	6	7	5	6	6	5	7	7	5	7	6	7	5	6	6	5	7	7	5	7	6	7	1558800000
E9QKK8;F6Q8D3;Q9QZW0;E9Q3G7;P98197;F6Z4J2;Q6DFW5;D6RII8;A0A0G2JE89	E9QKK8;F6Q8D3;Q9QZW0	Phospholipid-transporting ATPase;Phospholipid-transporting ATPase 11C	Atp11c	B cell activation;B cell differentiation;biological regulation;cell activation;cell differentiation;cellular component organization;cellular component organization or biogenesis;cellular developmental process;cellular membrane organization;cellular process;developmental process;establishment of localization;immature B cell differentiation;immune system process;leukocyte activation;leukocyte diffe…	adenyl nucleotide binding;adenyl ribonucleotide binding;ATP binding;ATPase activity;ATPase activity, coupled;ATPase activity, coupled to movement of substances;binding;catalytic activity;cation binding;hydrolase activity;hydrolase activity, acting on acid anhydrides;hydrolase activity, acting on acid anhydrides, in phosphorus-containing anhydrides;ion binding;lipid transporter activity;magnesium …	cell part;cytoplasmic part;early endosome;endoplasmic reticulum;endoplasmic reticulum membrane;endoplasmic reticulum part;endosome;integral to membrane;intracellular membrane-bounded organelle;intracellular organelle;intracellular organelle part;intracellular part;intrinsic to membrane;lysosomal membrane;membrane;membrane part;membrane-bounded organelle;organelle;organelle membrane;organelle part…		28	28	28	28.6	28.6	28.6	127.81	139.82	2080600000	524	9	23	21	21	21	19	21	18	18	16	11	23	21	21	21	19	21	18	18	16	11	23	21	21	21	19	21	18	18	16	11	316400000
E9QN99;A0A087WPF8;A0A087WQN8;A0A087WSR2;Q8VCR7;A0A087WRJ2;A0A087WP24	E9QN99;A0A087WPF8;A0A087WQN8;A0A087WSR2;Q8VCR7;A0A087WRJ2;A0A087WP24	Alpha/beta hydrolase domain-containing protein 14B	Abhd14b	biological regulation;metabolic process;positive regulation of biological process;positive regulation of biosynthetic process;positive regulation of cellular biosynthetic process;positive regulation of cellular metabolic process;positive regulation of cellular process;positive regulation of gene expression;positive regulation of macromolecule biosynthetic process;positive regulation of macromolec…	catalytic activity;hydrolase activity	cell part;cytoplasm;cytoplasmic part;cytosol;extracellular membrane-bounded organelle;extracellular organelle;extracellular region part;extracellular vesicular exosome;intracellular membrane-bounded organelle;intracellular non-membrane-bounded organelle;intracellular organelle;intracellular organelle part;intracellular part;membrane-bounded organelle;membrane-bounded vesicle;non-membrane-bounded …		9	9	9	56.2	56.2	56.2	22.45	55.324	1677800000	227	7	6	6	5	6	8	7	5	8	6	7	6	6	5	6	8	7	5	8	6	7	6	6	5	6	8	7	5	8	6	7	109180000
E9QNH7;Q5XG73;Z4YM84	E9QNH7;Q5XG73	Acyl-CoA-binding domain-containing protein 5	Acbd5	autophagy;catabolic process;cellular catabolic process;cellular component organization;cellular component organization at cellular level;cellular component organization or biogenesis;cellular component organization or biogenesis at cellular level;cellular metabolic process;cellular process;establishment of localization;metabolic process;organelle organization;peroxisome degradation;peroxisome org…	binding;carboxylic acid binding;coenzyme binding;cofactor binding;fatty acid binding;fatty-acyl-CoA binding;lipid binding;monocarboxylic acid binding	cell part;cytoplasmic part;integral to membrane;intracellular membrane-bounded organelle;intracellular organelle;intracellular organelle part;intracellular part;intrinsic to membrane;membrane;membrane part;membrane-bounded organelle;microbody;microbody membrane;microbody part;nuclear part;nucleoplasm;nucleus;organelle;organelle membrane;organelle part;peroxisomal membrane;peroxisomal part;peroxis…		3	3	3	6.7	6.7	6.7	56.712	104.74	432690000	117	3	3	2	2	2	3	2	3	2	3	3	3	2	2	2	3	2	3	2	3	3	3	2	2	2	3	2	3	2	3	3	34319000
E9QNW6;Q8VDG7;D3Z3Q4	E9QNW6;Q8VDG7	Platelet-activating factor acetylhydrolase 2, cytoplasmic	Pafah2	biological regulation;catabolic process;lipid catabolic process;lipid metabolic process;metabolic process;negative regulation of apoptosis;negative regulation of biological process;negative regulation of cell death;negative regulation of cellular process;negative regulation of programmed cell death;primary metabolic process;regulation of apoptosis;regulation of biological process;regulation of ce…	1-alkyl-2-acetylglycerophosphocholine esterase activity;carboxylic ester hydrolase activity;catalytic activity;hydrolase activity;hydrolase activity, acting on ester bonds	cell part;cytoplasm;intracellular part	Ether lipid metabolism	9	9	9	26.3	26.3	26.3	46.2	19.39	247020000	48	3	7	7	7	4	7	3	2	3	4	4	7	7	7	4	7	3	2	3	4	4	7	7	7	4	7	3	2	3	4	4	24937000
G5E8R3;E9QPD7;Q05920	G5E8R3;E9QPD7;Q05920	Pyruvate carboxylase;Pyruvate carboxylase, mitochondrial	Pcx;Pc	alcohol biosynthetic process;alcohol metabolic process;biological regulation;biosynthetic process;carbohydrate biosynthetic process;carbohydrate metabolic process;carboxylic acid metabolic process;cellular biosynthetic process;cellular carbohydrate biosynthetic process;cellular carbohydrate metabolic process;cellular ketone metabolic process;cellular metabolic process;cellular process;dicarboxyli…	adenyl nucleotide binding;adenyl ribonucleotide binding;ATP binding;binding;biotin binding;biotin carboxylase activity;carboxylic acid binding;catalytic activity;cation binding;DNA binding;ion binding;ligase activity;ligase activity, forming carbon-carbon bonds;ligase activity, forming carbon-nitrogen bonds;metal ion binding;monocarboxylic acid binding;nucleic acid binding;nucleotide binding;puri…	cell part;cytoplasm;cytoplasmic part;intracellular membrane-bounded organelle;intracellular organelle;intracellular organelle lumen;intracellular organelle part;intracellular part;membrane;membrane-bounded organelle;membrane-enclosed lumen;mitochondrial inner membrane;mitochondrial matrix;mitochondrial membrane;mitochondrial part;mitochondrion;organelle;organelle inner membrane;organelle lumen;or…	Citrate cycle (TCA cycle);Pyruvate metabolism	53	53	53	56.1	56.1	56.1	129.7	323.31	19598000000	3769	3	42	41	39	40	40	40	40	47	44	47	42	41	39	40	40	40	40	47	44	47	42	41	39	40	40	40	40	47	44	47	1788700000
E9QPE7;O08638	E9QPE7;O08638	Myosin-11	Myh11	actin cytoskeleton organization;actin filament-based process;anatomical structure development;anatomical structure formation involved in morphogenesis;cardiac muscle fiber development;cell development;cellular component assembly;cellular component assembly at cellular level;cellular component assembly involved in morphogenesis;cellular component organization;cellular component organization at cel…	adenyl nucleotide binding;adenyl ribonucleotide binding;ATP binding;binding;catalytic activity;hydrolase activity;hydrolase activity, acting on acid anhydrides;hydrolase activity, acting on acid anhydrides, in phosphorus-containing anhydrides;motor activity;nucleoside-triphosphatase activity;nucleotide binding;purine nucleotide binding;purine ribonucleoside triphosphate binding;purine ribonucleot…	actin filament bundle;actomyosin;brush border;cell part;cell projection;contractile fiber;contractile fiber part;cytoplasmic membrane-bounded vesicle;cytoplasmic part;cytoplasmic vesicle;cytoskeletal part;extracellular membrane-bounded organelle;extracellular organelle;extracellular region part;extracellular vesicular exosome;intracellular membrane-bounded organelle;intracellular non-membrane-bou…	Tight junction;Viral myocarditis	44	31	28	27.5	20.4	19.1	223.35	178.87	648220000	124	2	15	12	19	14	41	34	17	10	8	15	4	2	8	4	29	24	7	1	0	6	1	2	5	3	26	21	5	1	0	5	1814200
E9QPX3;Q9CXZ1	E9QPX3;Q9CXZ1	NADH dehydrogenase [ubiquinone] iron-sulfur protein 4, mitochondrial	Ndufs4	anatomical structure development;biological regulation;brain development;cAMP-mediated signaling;cellular component assembly;cellular component assembly at cellular level;cellular component biogenesis;cellular component organization;cellular component organization at cellular level;cellular component organization or biogenesis;cellular component organization or biogenesis at cellular level;cellul…	catalytic activity;NADH dehydrogenase (quinone) activity;NADH dehydrogenase (ubiquinone) activity;NADH dehydrogenase activity;oxidoreductase activity;oxidoreductase activity, acting on NADH or NADPH;oxidoreductase activity, acting on NADH or NADPH, quinone or similar compound as acceptor	cell part;cytoplasmic part;intracellular membrane-bounded organelle;intracellular organelle;intracellular organelle part;intracellular part;macromolecular complex;membrane part;membrane-bounded organelle;mitochondrial membrane part;mitochondrial part;mitochondrial respiratory chain complex I;mitochondrion;NADH dehydrogenase complex;organelle;organelle part;protein complex;respiratory chain comple…	Alzheimer's disease;Huntington's disease;Oxidative phosphorylation;Parkinson's disease	5	5	5	31.4	31.4	31.4	19.803	28.41	1724300000	323	2	4	4	4	4	5	4	5	4	5	5	4	4	4	4	5	4	5	4	5	5	4	4	4	4	5	4	5	4	5	5	180550000
F6SFF5;Q8K1Z0	F6SFF5;Q8K1Z0	Ubiquinone biosynthesis protein COQ9, mitochondrial	Coq9	biosynthetic process;cellular biosynthetic process;cellular ketone metabolic process;cellular metabolic process;cellular process;coenzyme biosynthetic process;coenzyme metabolic process;cofactor biosynthetic process;cofactor metabolic process;electron transport chain;generation of precursor metabolites and energy;metabolic process;mitochondrial electron transport, NADH to ubiquinone;oxidation-red…	binding;identical protein binding;lipid binding;protein binding;protein dimerization activity;protein homodimerization activity	cell part;cytoplasmic part;intracellular membrane-bounded organelle;intracellular organelle;intracellular part;membrane-bounded organelle;mitochondrion;organelle		5	5	5	25.5	25.5	25.5	27.939	63.326	1248300000	187	2	4	3	4	3	5	5	5	4	3	3	4	3	4	3	5	5	5	4	3	3	4	3	4	3	5	5	5	4	3	3	69886000
F6SVV1;Q4FZE6;P62082	F6SVV1;Q4FZE6;P62082	40S ribosomal protein S7	Gm9493;Rps7	anatomical structure formation involved in morphogenesis;biosynthetic process;cell differentiation;cellular biosynthetic process;cellular component biogenesis;cellular component biogenesis at cellular level;cellular component organization or biogenesis;cellular component organization or biogenesis at cellular level;cellular developmental process;cellular macromolecule biosynthetic process;cellula…	structural constituent of ribosome;structural molecule activity	90S preribosome;adherens junction;anchoring junction;cell junction;cell part;cell-substrate adherens junction;cell-substrate junction;cytoplasm;cytoplasmic part;cytoskeletal part;cytosolic small ribosomal subunit;extracellular membrane-bounded organelle;extracellular organelle;extracellular region part;extracellular vesicular exosome;focal adhesion;intracellular membrane-bounded organelle;intrace…	Ribosome	9	9	9	56.8	56.8	56.8	21.882	46.157	1695700000	691	3	8	6	7	6	6	7	4	7	7	8	8	6	7	6	6	7	4	7	7	8	8	6	7	6	6	7	4	7	7	8	106900000
F6VNW5;H3BJA3;Q4FJZ6;O09172;A0A0G2JDI4	F6VNW5;H3BJA3;Q4FJZ6;O09172;A0A0G2JDI4	Glutamate--cysteine ligase regulatory subunit	Gclm	amine biosynthetic process;amine metabolic process;apoptotic mitochondrial changes;biological regulation;biosynthetic process;carboxylic acid biosynthetic process;carboxylic acid metabolic process;cellular amine metabolic process;cellular amino acid biosynthetic process;cellular amino acid metabolic process;cellular biosynthetic process;cellular component organization;cellular component organizat…	acid-amino acid ligase activity;binding;catalytic activity;enzyme binding;enzyme regulator activity;glutamate-cysteine ligase activity;glutamate-cysteine ligase catalytic subunit binding;ligase activity;ligase activity, forming carbon-nitrogen bonds;protein binding;protein dimerization activity;protein heterodimerization activity	cell part;cytoplasmic part;glutamate-cysteine ligase complex;intracellular part;macromolecular complex;protein complex	Glutathione metabolism	4	4	4	32.7	32.7	32.7	16.997	5.2469	240150000	14	5	3	2	2	2	4	1	3	2	0	2	3	2	2	2	4	1	3	2	0	2	3	2	2	2	4	1	3	2	0	2	37189000
F6YY69;F6VW30;P68254	F6YY69;F6VW30;P68254	14-3-3 protein theta	Ywhaq	anatomical structure development;biological regulation;developmental process;negative regulation of biological process;negative regulation of biosynthetic process;negative regulation of cellular biosynthetic process;negative regulation of cellular macromolecule biosynthetic process;negative regulation of cellular metabolic process;negative regulation of cellular process;negative regulation of gen…		adherens junction;anchoring junction;cell junction;cell part;cell-substrate adherens junction;cell-substrate junction;cytoplasmic part;cytoplasmic vesicle membrane;cytoplasmic vesicle part;cytosol;extracellular membrane-bounded organelle;extracellular organelle;extracellular region part;extracellular vesicular exosome;focal adhesion;intracellular organelle part;intracellular part;macromolecular c…	Cell cycle;Neurotrophin signaling pathway;Oocyte meiosis	9	4	4	28.8	16.5	16.5	32.221	41.015	220780000	40	3	6	5	3	6	7	7	6	7	7	8	3	2	1	2	3	3	2	4	4	4	3	2	1	2	3	3	2	4	4	4	17547000
F6YTZ4;Q58EU3;P25444;A0A140T8L5;D3YVC1;E9Q1N8;J3QMG5;D3YWJ3;D3Z536	F6YTZ4;Q58EU3;P25444;A0A140T8L5;D3YVC1;E9Q1N8;J3QMG5;D3YWJ3	40S ribosomal protein S2	Gm6576;Rps2;Gm18025;Gm5786	biological regulation;biosynthetic process;cellular biosynthetic process;cellular macromolecule biosynthetic process;cellular macromolecule metabolic process;cellular metabolic process;cellular process;cellular protein metabolic process;cellular response to chemical stimulus;cellular response to cytokine stimulus;cellular response to interleukin-4;cellular response to organic substance;cellular r…	binding;enzyme binding;fibroblast growth factor binding;growth factor binding;mRNA binding;nucleic acid binding;protein binding;RNA binding;structural constituent of ribosome;structural molecule activity	adherens junction;anchoring junction;cell junction;cell part;cell-substrate adherens junction;cell-substrate junction;cytoplasm;cytosolic small ribosomal subunit;extracellular membrane-bounded organelle;extracellular organelle;extracellular region part;extracellular vesicular exosome;focal adhesion;intracellular membrane-bounded organelle;intracellular organelle;intracellular organelle part;intra…	Ribosome	9	9	9	35	35	35	30.101	71.325	1690300000	320	9	3	6	5	5	4	6	7	8	7	7	3	6	5	5	4	6	7	8	7	7	3	6	5	5	4	6	7	8	7	7	63901000
Q561N5;F6YVP7;P62270;S4R1N6;A0A140T8T3	Q561N5;F6YVP7;P62270;S4R1N6;A0A140T8T3	40S ribosomal protein S18	Rps18;Gm10260	biosynthetic process;cellular biosynthetic process;cellular component biogenesis;cellular component biogenesis at cellular level;cellular component organization or biogenesis;cellular component organization or biogenesis at cellular level;cellular macromolecule biosynthetic process;cellular macromolecule metabolic process;cellular metabolic process;cellular process;cellular protein metabolic proc…	binding;nucleic acid binding;RNA binding;rRNA binding;structural constituent of ribosome;structural molecule activity	adherens junction;anchoring junction;cell junction;cell part;cell-substrate adherens junction;cell-substrate junction;cytoplasm;cytoplasmic part;cytosol;cytosolic small ribosomal subunit;extracellular membrane-bounded organelle;extracellular organelle;extracellular region part;extracellular vesicular exosome;focal adhesion;intracellular membrane-bounded organelle;intracellular organelle;intracell…	Ribosome	11	11	11	57.9	57.9	57.9	17.718	154.67	3983400000	410	5	5	6	6	9	7	6	7	10	10	9	5	6	6	9	7	6	7	10	10	9	5	6	6	9	7	6	7	10	10	9	222680000
F6ZFT1;F8WJ64;Q569N0;Q9CR21	F6ZFT1;F8WJ64;Q569N0;Q9CR21	Acyl carrier protein;Acyl carrier protein, mitochondrial	Ndufab1	biosynthetic process;carboxylic acid biosynthetic process;carboxylic acid metabolic process;cellular biosynthetic process;cellular ketone metabolic process;cellular lipid metabolic process;cellular macromolecule metabolic process;cellular metabolic process;cellular process;cellular protein metabolic process;fatty acid biosynthetic process;fatty acid metabolic process;lipid biosynthetic process;li…		cell part;cytoplasmic part;intracellular membrane-bounded organelle;intracellular organelle;intracellular organelle part;intracellular part;macromolecular complex;membrane part;membrane-bounded organelle;mitochondrial membrane part;mitochondrial part;mitochondrial respiratory chain complex I;mitochondrion;NADH dehydrogenase complex;organelle;organelle part;protein complex;respiratory chain comple…	Alzheimer's disease;Huntington's disease;Oxidative phosphorylation;Parkinson's disease	4	4	4	26	26	26	14.309	24.922	752770000	204	4	2	4	2	3	3	3	3	4	3	4	2	4	2	3	3	3	3	4	3	4	2	4	2	3	3	3	3	4	3	4	72836000
F6ZHD8;Q9D6Y9;G3UW30	F6ZHD8;Q9D6Y9;G3UW30	1,4-alpha-glucan-branching enzyme	Gbe1	biosynthetic process;carbohydrate biosynthetic process;carbohydrate metabolic process;cellular biosynthetic process;cellular carbohydrate biosynthetic process;cellular carbohydrate metabolic process;cellular glucan metabolic process;cellular macromolecule biosynthetic process;cellular macromolecule metabolic process;cellular metabolic process;cellular polysaccharide biosynthetic process;cellular …	1,4-alpha-glucan branching enzyme activity;binding;catalytic activity;cation binding;hydrolase activity;hydrolase activity, acting on glycosyl bonds;hydrolase activity, hydrolyzing O-glycosyl compounds;ion binding;transferase activity;transferase activity, transferring glycosyl groups;transferase activity, transferring hexosyl groups	extracellular membrane-bounded organelle;extracellular organelle;extracellular region part;extracellular vesicular exosome;membrane-bounded organelle;membrane-bounded vesicle;organelle;vesicle	Starch and sucrose metabolism	13	13	13	25.8	25.8	25.8	80.336	45.308	690390000	108	3	10	7	6	7	8	4	8	9	5	8	10	7	6	7	8	4	8	9	5	8	10	7	6	7	8	4	8	9	5	8	88809000
S4R1E5;F7A8H6;O70325;Q91XR9	S4R1E5;F7A8H6;O70325;Q91XR9	Glutathione peroxidase;Phospholipid hydroperoxide glutathione peroxidase, mitochondrial;Phospholipid hydroperoxide glutathione peroxidase, nuclear	Gpx4	cellular component organization;cellular component organization at cellular level;cellular component organization or biogenesis;cellular component organization or biogenesis at cellular level;cellular process;chromatin organization;chromosome organization;developmental process;gamete generation;male gamete generation;multicellular organismal development;multicellular organismal process;multicellu…	antioxidant activity;catalytic activity;glutathione peroxidase activity;oxidoreductase activity;oxidoreductase activity, acting on paired donors, with incorporation or reduction of molecular oxygen;oxidoreductase activity, acting on peroxide as acceptor;peroxidase activity;phospholipid-hydroperoxide glutathione peroxidase activity	cell part;cytoplasmic part;cytosol;envelope;extracellular membrane-bounded organelle;extracellular organelle;extracellular region part;extracellular vesicular exosome;intracellular membrane-bounded organelle;intracellular organelle;intracellular organelle part;intracellular part;membrane;membrane-bounded organelle;membrane-bounded vesicle;mitochondrial inner membrane;mitochondrial membrane;mitoch…	Glutathione metabolism	7	7	7	47.1	47.1	47.1	17.937	32.345	867270000	202	4	6	6	6	6	7	7	6	6	5	5	6	6	6	6	7	7	6	6	5	5	6	6	6	6	7	7	6	6	5	5	55391000
F7C846;P47802;G3XA66;D3Z3F4;G3XA75;D3YVW0;G3UYJ5;G3UXX9;G3UXB5	F7C846;P47802;G3XA66;D3Z3F4;G3XA75;D3YVW0;G3UYJ5;G3UXX9	Metaxin-1	Mtx1	establishment of localization;establishment of localization in cell;establishment of protein localization;establishment of protein localization in mitochondrion;establishment of protein localization to organelle;intracellular protein transport;intracellular transport;mitochondrial transport;protein import;protein targeting;protein targeting to mitochondrion;protein transport;transport		cell part;cytoplasmic part;integral to membrane;intracellular membrane-bounded organelle;intracellular organelle;intracellular organelle part;intracellular part;intrinsic to membrane;membrane;membrane part;membrane-bounded organelle;mitochondrial inner membrane;mitochondrial membrane;mitochondrial outer membrane;mitochondrial part;mitochondrion;organelle;organelle inner membrane;organelle membran…		11	11	11	23.6	23.6	23.6	51.341	26.147	616810000	145	9	7	7	8	8	8	8	8	7	8	5	7	7	8	8	8	8	8	7	8	5	7	7	8	8	8	8	8	7	8	5	41613000
F8VPN4;A0A0G2JGI9;F6XXE6;E0CYU6;E0CX86;F7CSZ6	F8VPN4;A0A0G2JGI9		Agl	biosynthetic process;carbohydrate biosynthetic process;carbohydrate catabolic process;carbohydrate metabolic process;catabolic process;cellular biosynthetic process;cellular carbohydrate biosynthetic process;cellular carbohydrate catabolic process;cellular carbohydrate metabolic process;cellular glucan metabolic process;cellular macromolecule biosynthetic process;cellular macromolecule metabolic …	4-alpha-glucanotransferase activity;alpha-glucosidase activity;amylo-alpha-1,6-glucosidase activity;binding;carbohydrate binding;catalytic activity;glucosidase activity;glycogen debranching enzyme activity;hydrolase activity;hydrolase activity, acting on glycosyl bonds;hydrolase activity, hydrolyzing O-glycosyl compounds;pattern binding;polysaccharide binding;polyubiquitin binding;protein binding…	cell part;cytoplasm;cytoplasmic part;endoplasmic reticulum;inclusion body;intracellular membrane-bounded organelle;intracellular organelle;intracellular organelle part;intracellular part;membrane-bounded organelle;nuclear part;nucleoplasm;nucleus;organelle;organelle part;sarcoplasmic reticulum	Starch and sucrose metabolism	32	32	32	25.8	25.8	25.8	174.29	120.57	679800000	114	6	9	9	8	12	13	9	6	24	11	25	9	9	8	12	13	9	6	24	11	25	9	9	8	12	13	9	6	24	11	25	46804000
F8WGL3;P18760	F8WGL3;P18760	Cofilin-1	Cfl1	actin cytoskeleton organization;actin filament depolymerization;actin filament organization;actin filament-based process;actin polymerization or depolymerization;ameboidal cell migration;anatomical structure morphogenesis;biological regulation;cell cycle cytokinesis;cell cycle process;cell migration;cell motility;cell projection organization;cellular component disassembly;cellular component disas…		adherens junction;anchoring junction;cell cortex part;cell junction;cell part;cell projection;cell projection membrane;cell projection part;cell-cell junction;cell-substrate adherens junction;cell-substrate junction;cortical actin cytoskeleton;cortical cytoskeleton;cytoplasm;cytoplasmic part;cytoskeletal part;cytoskeleton;cytosol;extracellular membrane-bounded organelle;extracellular organelle;ex…	Axon guidance;Fc gamma R-mediated phagocytosis;Regulation of actin cytoskeleton	10	10	8	48.9	48.9	41	24.576	55.037	818790000	169	2	6	4	4	7	8	6	5	6	6	10	6	4	4	7	8	6	5	6	6	10	5	3	3	6	6	5	4	5	5	8	36888000
F8WIB1;Q14AC7;P61211;E9Q006	F8WIB1;Q14AC7;P61211	ADP-ribosylation factor-like protein 1	Arl1	activation of phospholipase D activity;biological regulation;cellular component organization;cellular component organization at cellular level;cellular component organization or biogenesis;cellular component organization or biogenesis at cellular level;cellular localization;cellular macromolecule localization;cellular metabolic process;cellular process;cellular protein localization;cellular respo…	binding;catalytic activity;cation binding;enzyme activator activity;enzyme regulator activity;GTP binding;GTPase activity;guanyl nucleotide binding;guanyl ribonucleotide binding;hydrolase activity;hydrolase activity, acting on acid anhydrides;hydrolase activity, acting on acid anhydrides, in phosphorus-containing anhydrides;ion binding;metal ion binding;nucleoside-triphosphatase activity;nucleoti…	cell part;cytoplasm;cytoplasmic part;extracellular membrane-bounded organelle;extracellular organelle;extracellular region part;extracellular vesicular exosome;Golgi apparatus;Golgi apparatus part;Golgi membrane;intracellular membrane-bounded organelle;intracellular organelle;intracellular organelle part;intracellular part;membrane;membrane-bounded organelle;membrane-bounded vesicle;organelle;org…		5	5	5	34.1	34.1	34.1	15.65	7.4054	110620000	27	4	5	2	2	2	3	3	2	3	2	3	5	2	2	2	3	3	2	3	2	3	5	2	2	2	3	3	2	3	2	3	19869000
G3UXG7;G3UZJ5;P67871;G3UZA4;G3UXU2;G3UZX4	G3UXG7;G3UZJ5;P67871;G3UZA4;G3UXU2;G3UZX4	Casein kinase II subunit beta	Csnk2b	adiponectin-mediated signaling pathway;anatomical structure morphogenesis;biological regulation;cell surface receptor linked signaling pathway;cellular process;cellular response to chemical stimulus;cellular response to cytokine stimulus;cellular response to organic substance;cellular response to stimulus;cytokine-mediated signaling pathway;developmental process;endothelial tube morphogenesis;epi…	binding;cation binding;chromatin binding;enzyme regulator activity;identical protein binding;ion binding;kinase regulator activity;metal ion binding;protein binding;protein domain specific binding;protein kinase regulator activity;receptor binding;transcription factor binding	cell part;cytoplasm;extracellular membrane-bounded organelle;extracellular organelle;extracellular region part;extracellular vesicular exosome;intracellular membrane-bounded organelle;intracellular organelle;intracellular organelle part;intracellular part;macromolecular complex;membrane;membrane-bounded organelle;membrane-bounded vesicle;nuclear part;nucleus;organelle;organelle part;PcG protein c…	Adherens junction;Circadian rhythm - plant;Measles;Ribosome biogenesis in eukaryotes;Tight junction;Wnt signaling pathway	3	3	3	25.6	25.6	25.6	18.926	41.098	189150000	37	6	2	2	1	2	3	2	2	2	2	1	2	2	1	2	3	2	2	2	2	1	2	2	1	2	3	2	2	2	2	1	29136000
G3UXY0;G3UXZ5;Q5HZK3;P97371;G3X9K9;G3UWN9;G3UXR1	G3UXY0;G3UXZ5;Q5HZK3;P97371;G3X9K9	Proteasome activator complex subunit 1	Psme1	antigen processing and presentation;antigen processing and presentation of exogenous antigen;biological regulation;immune system process;positive regulation of catalytic activity;positive regulation of endopeptidase activity;positive regulation of hydrolase activity;positive regulation of molecular function;positive regulation of peptidase activity;regulation of biological process;regulation of c…	endopeptidase activator activity;endopeptidase regulator activity;enzyme activator activity;enzyme regulator activity;peptidase activator activity;peptidase regulator activity	cell part;extracellular membrane-bounded organelle;extracellular organelle;extracellular region part;extracellular vesicular exosome;intracellular part;macromolecular complex;membrane-bounded organelle;membrane-bounded vesicle;organelle;proteasome activator complex;protein complex;vesicle	Antigen processing and presentation;Proteasome	7	7	7	32.3	32.3	32.3	26.092	31.306	606520000	197	7	5	6	3	6	7	5	7	6	4	6	5	6	3	6	7	5	7	6	4	6	5	6	3	6	7	5	7	6	4	6	74607000
G3UY38;G5E924;Q8R081;G3UYY3;G3UY56	G3UY38;G5E924;Q8R081;G3UYY3;G3UY56	Heterogeneous nuclear ribonucleoprotein L	Hnrnpl	cellular macromolecule metabolic process;cellular metabolic process;cellular nitrogen compound metabolic process;cellular process;macromolecule metabolic process;metabolic process;mRNA metabolic process;mRNA processing;nitrogen compound metabolic process;nucleic acid metabolic process;nucleobase-containing compound metabolic process;primary metabolic process;RNA metabolic process;RNA processing	binding;DNA binding;nucleic acid binding;nucleotide binding;regulatory region DNA binding;regulatory region nucleic acid binding;transcription regulatory region DNA binding	cell part;cytoplasm;extracellular membrane-bounded organelle;extracellular organelle;extracellular region part;extracellular vesicular exosome;intracellular membrane-bounded organelle;intracellular organelle;intracellular organelle part;intracellular part;macromolecular complex;membrane;membrane-bounded organelle;membrane-bounded vesicle;nuclear part;nucleoplasm;nucleus;organelle;organelle part;p…		2	2	2	4.4	4.4	4.4	50.564	2.6287	41468000	21	5	1	0	2	2	1	2	1	2	2	2	1	0	2	2	1	2	1	2	2	2	1	0	2	2	1	2	1	2	2	2	914920
G3UYK9;G3UYM7;G3UZJ3;G3UXK0;G3UY34;Q8K0N0;Q8C8Z9;G3UZ87;O70585;Q8CFR5;Q9D2N4	G3UYK9;G3UYM7;G3UZJ3;G3UXK0;G3UY34;Q8K0N0;Q8C8Z9;G3UZ87;O70585	Dystrobrevin;Dystrobrevin beta	Dtnb		binding;cation binding;ion binding;metal ion binding;transition metal ion binding;zinc ion binding	axon;cell junction;cell part;cell projection;cytoplasm;dystrobrevin complex;extrinsic to internal side of plasma membrane;extrinsic to membrane;extrinsic to plasma membrane;intracellular part;macromolecular complex;membrane;membrane part;neuron projection;plasma membrane;plasma membrane part;protein complex;sarcolemma;synapse		3	3	3	5.7	5.7	5.7	55.011	3.9032	141690000	7	11	2	1	1	1	3	2	2	2	1	0	2	1	1	1	3	2	2	2	1	0	2	1	1	1	3	2	2	2	1	0	15389000
G3UYU4;Q540I4;O08917;G3XA73;G3UZZ5;G3UWW8	G3UYU4;Q540I4;O08917;G3XA73;G3UZZ5;G3UWW8	Flotillin-1	Flot1	anatomical structure morphogenesis;axon guidance;axonogenesis;biological regulation;cell part morphogenesis;cell projection morphogenesis;cell projection organization;cellular component disassembly;cellular component disassembly at cellular level;cellular component morphogenesis;cellular component organization;cellular component organization at cellular level;cellular component organization or bi…	binding;enzyme binding;protease binding;protein binding	adherens junction;anchoring junction;caveola;cell junction;cell part;cell-substrate adherens junction;cell-substrate junction;centriolar satellite;cytoplasmic membrane-bounded vesicle;cytoplasmic part;cytoplasmic vesicle;cytoskeletal part;endosome;extracellular membrane-bounded organelle;extracellular organelle;extracellular region part;extracellular vesicular exosome;flotillin complex;focal adhe…	Insulin signaling pathway	2	2	2	6.1	6.1	6.1	42.238	6.3372	66568000	8	6	2	2	2	1	2	2	1	0	2	1	2	2	2	1	2	2	1	0	2	1	2	2	2	1	2	2	1	0	2	1	17098000
G3UYV7;Q059I1;P62858;J3QNN8	G3UYV7;Q059I1;P62858;J3QNN8	40S ribosomal protein S28	Rps28;Gm10263	biosynthetic process;cellular biosynthetic process;cellular component biogenesis;cellular component biogenesis at cellular level;cellular component organization or biogenesis;cellular component organization or biogenesis at cellular level;cellular macromolecule biosynthetic process;cellular macromolecule metabolic process;cellular metabolic process;cellular nitrogen compound metabolic process;cel…	structural constituent of ribosome;structural molecule activity	cell part;cytoplasm;cytosolic small ribosomal subunit;extracellular membrane-bounded organelle;extracellular organelle;extracellular region part;extracellular vesicular exosome;intracellular organelle part;intracellular part;macromolecular complex;membrane-bounded organelle;membrane-bounded vesicle;organelle;organelle part;ribonucleoprotein complex;small ribosomal subunit;vesicle	Ribosome	2	2	2	37.5	37.5	37.5	6.3442	56.814	456440000	96	4	2	2	2	2	2	2	2	2	2	2	2	2	2	2	2	2	2	2	2	2	2	2	2	2	2	2	2	2	2	2	20219000
G3UZ26;P50431;G3UYY1;G3UZZ9	G3UZ26;P50431;G3UYY1	Serine hydroxymethyltransferase;Serine hydroxymethyltransferase, cytosolic	Shmt1	amine biosynthetic process;amine catabolic process;amine metabolic process;biosynthetic process;carboxylic acid biosynthetic process;carboxylic acid catabolic process;carboxylic acid metabolic process;catabolic process;cellular amine metabolic process;cellular amino acid biosynthetic process;cellular amino acid catabolic process;cellular amino acid metabolic process;cellular aromatic compound met…	aldehyde-lyase activity;amine binding;amino acid binding;binding;carbon-carbon lyase activity;carboxylic acid binding;catalytic activity;cofactor binding;glycine hydroxymethyltransferase activity;hydroxymethyl-, formyl- and related transferase activity;identical protein binding;L-allo-threonine aldolase activity;lyase activity;protein binding;protein dimerization activity;protein homodimerization…	cell part;cytoplasm;cytoplasmic part;cytosol;extracellular membrane-bounded organelle;extracellular organelle;extracellular region part;extracellular vesicular exosome;intracellular membrane-bounded organelle;intracellular organelle;intracellular organelle part;intracellular part;membrane-bounded organelle;membrane-bounded vesicle;mitochondrion;nuclear part;nucleoplasm;nucleus;organelle;organelle…	Cyanoamino acid metabolism;Glycine, serine and threonine metabolism;Methane metabolism;One carbon pool by folate	17	16	16	49.9	46.7	46.7	48.334	100.05	1722800000	333	4	10	11	11	11	11	8	10	17	13	13	9	10	10	10	10	7	9	16	12	12	9	10	10	10	10	7	9	16	12	12	91957000
Q9WUD0;G3X8Q9;P12791;A6H6J2	Q9WUD0;G3X8Q9;P12791	Cytochrome P450 2B10	Cyp2b10	arachidonic acid metabolic process;carboxylic acid metabolic process;catabolic process;cellular catabolic process;cellular ketone metabolic process;cellular lipid metabolic process;cellular metabolic process;cellular process;drug catabolic process;drug metabolic process;epoxygenase P450 pathway;exogenous drug catabolic process;fatty acid metabolic process;icosanoid metabolic process;lipid metabol…	arachidonic acid epoxygenase activity;arachidonic acid monooxygenase activity;aromatase activity;binding;catalytic activity;cation binding;heme binding;ion binding;iron ion binding;metal ion binding;monooxygenase activity;oxidoreductase activity;oxidoreductase activity, acting on paired donors, with incorporation or reduction of molecular oxygen;oxidoreductase activity, acting on paired donors, w…	cell part;cytoplasm;cytoplasmic part;endoplasmic reticulum membrane;endoplasmic reticulum part;intracellular membrane-bounded organelle;intracellular organelle;intracellular organelle part;intracellular part;membrane;membrane part;membrane-bounded organelle;organelle;organelle membrane;organelle part	Arachidonic acid metabolism;Drug metabolism - cytochrome P450;Metabolism of xenobiotics by cytochrome P450;Retinol metabolism	12	12	6	25.1	25.1	14.1	55.87	63.827	205020000	55	4	6	7	6	9	7	4	2	10	7	6	6	7	6	9	7	4	2	10	7	6	3	6	5	5	4	1	1	5	4	3	14065000
G3X982;A0A087WQC8	G3X982	Aldehyde oxidase 3	Aox3		2 iron, 2 sulfur cluster binding;aldehyde oxidase activity;binding;catalytic activity;cation binding;coenzyme binding;cofactor binding;electron carrier activity;flavin adenine dinucleotide binding;ion binding;iron ion binding;iron-sulfur cluster binding;metal cluster binding;metal ion binding;molybdenum ion binding;NAD binding;nucleotide binding;oxidoreductase activity;oxidoreductase activity, ac…	cell part;cytoplasm;intracellular part		19	19	17	19.5	19.5	18.1	146.9	110.99	1124400000	140	2	8	11	10	11	14	8	15	12	10	7	8	11	10	11	14	8	15	12	10	7	7	11	9	10	13	7	14	11	9	6	60014000
G3X9L6;Q9DCX2;B1ASE2	G3X9L6;Q9DCX2;B1ASE2	ATP synthase subunit d, mitochondrial	Gm10250;Atp5h	ATP biosynthetic process;ATP metabolic process;ATP synthesis coupled proton transport;biosynthetic process;cation transport;cellular biosynthetic process;cellular metabolic process;cellular nitrogen compound biosynthetic process;cellular nitrogen compound metabolic process;cellular process;energy coupled proton transport, down electrochemical gradient;establishment of localization;heterocycle bio…	cation transmembrane transporter activity;hydrogen ion transmembrane transporter activity;inorganic cation transmembrane transporter activity;ion transmembrane transporter activity;monovalent inorganic cation transmembrane transporter activity;substrate-specific transmembrane transporter activity;substrate-specific transporter activity;transmembrane transporter activity;transporter activity	cell part;cytoplasm;cytoplasmic part;extracellular membrane-bounded organelle;extracellular organelle;extracellular region part;extracellular vesicular exosome;intracellular membrane-bounded organelle;intracellular organelle;intracellular organelle part;intracellular part;macromolecular complex;membrane;membrane part;membrane-bounded organelle;membrane-bounded vesicle;mitochondrial inner membrane…	Alzheimer's disease;Huntington's disease;Oxidative phosphorylation;Parkinson's disease	13	13	13	77.5	77.5	77.5	18.621	312.13	8998600000	1359	3	10	11	13	13	12	10	11	12	13	12	10	11	13	13	12	10	11	12	13	12	10	11	13	13	12	10	11	12	13	12	536700000
G3X9V0;Q5SVP3;P97372;E0CZ90	G3X9V0;Q5SVP3;P97372;E0CZ90	Proteasome activator complex subunit 2	Psme2;PSME2b			cell part;intracellular part;macromolecular complex;proteasome activator complex;protein complex	Antigen processing and presentation;Proteasome	9	9	9	38.5	38.5	38.5	26.159	33.428	447940000	112	4	4	4	4	4	8	5	7	6	3	5	4	4	4	4	8	5	7	6	3	5	4	4	4	4	8	5	7	6	3	5	41802000
G3X9Y6	G3X9Y6		Akr1c19		catalytic activity;oxidoreductase activity			9	8	8	43.7	38.4	38.4	37.045	42.371	347540000	47	1	3	3	3	2	4	1	3	8	4	6	2	3	3	2	3	1	2	7	4	6	2	3	3	2	3	1	2	7	4	6	13112000
G3XA10;Q8VEK3	G3XA10;Q8VEK3	Heterogeneous nuclear ribonucleoprotein U	Gm28062;Hnrnpu	biological regulation;cell differentiation;cellular developmental process;cellular macromolecule metabolic process;cellular metabolic process;cellular nitrogen compound metabolic process;cellular process;circadian regulation of gene expression;circadian rhythm;CRD-mediated mRNA stabilization;developmental process;macromolecule metabolic process;metabolic process;mRNA metabolic process;mRNA proces…	adenyl nucleotide binding;adenyl ribonucleotide binding;ATP binding;binding;core promoter binding;DNA binding;nucleic acid binding;nucleotide binding;purine nucleotide binding;purine ribonucleoside triphosphate binding;purine ribonucleotide binding;regulatory region DNA binding;regulatory region nucleic acid binding;ribonucleotide binding;transcription regulatory region DNA binding	catalytic step 2 spliceosome;cell part;cell surface;CRD-mediated mRNA stability complex;cytoplasmic part;intracellular membrane-bounded organelle;intracellular organelle;intracellular organelle part;intracellular part;macromolecular complex;membrane;membrane-bounded organelle;nuclear part;nucleoplasm;nucleus;organelle;organelle part;protein complex;ribonucleoprotein complex;spliceosomal complex;v…	Spliceosome	5	5	5	7.4	7.4	7.4	86.805	4.8711	134890000	13	2	2	1	1	1	2	2	3	3	1	0	2	1	1	1	2	2	3	3	1	0	2	1	1	1	2	2	3	3	1	0	20078000
G5E814;Q9D8B4	G5E814;Q9D8B4	NADH dehydrogenase [ubiquinone] 1 alpha subcomplex subunit 11	Ndufa11	metabolic process;oxidation-reduction process		cell part;cytoplasmic part;integral to membrane;intracellular membrane-bounded organelle;intracellular organelle;intracellular organelle part;intracellular part;intrinsic to membrane;macromolecular complex;membrane part;membrane-bounded organelle;mitochondrial membrane part;mitochondrial part;mitochondrial respiratory chain complex I;mitochondrion;NADH dehydrogenase complex;organelle;organelle pa…	Alzheimer's disease;Huntington's disease;Oxidative phosphorylation;Parkinson's disease	3	3	3	35	35	35	15.115	44.447	721110000	305	2	3	3	3	3	3	3	3	3	3	3	3	3	3	3	3	3	3	3	3	3	3	3	3	3	3	3	3	3	3	3	63998000
G5E850;Q544Z9;P56395;E0CY88	G5E850;Q544Z9;P56395	Cytochrome b5	Cyb5a	carboxylic acid metabolic process;cellular ketone metabolic process;cellular lipid metabolic process;cellular metabolic process;cellular process;fatty acid metabolic process;lipid metabolic process;metabolic process;monocarboxylic acid metabolic process;organic acid metabolic process;oxidation-reduction process;oxoacid metabolic process;primary metabolic process;small molecule metabolic process	binding;catalytic activity;cation binding;CoA desaturase activity;enzyme binding;heme binding;ion binding;iron ion binding;metal ion binding;oxidoreductase activity;oxidoreductase activity, acting on paired donors, with incorporation or reduction of molecular oxygen;oxidoreductase activity, acting on paired donors, with oxidation of a pair of donors resulting in the reduction of molecular oxygen …	cell part;cytoplasmic part;endoplasmic reticulum membrane;endoplasmic reticulum part;extracellular membrane-bounded organelle;extracellular organelle;extracellular region part;extracellular vesicular exosome;integral to membrane;intracellular membrane-bounded organelle;intracellular organelle;intracellular organelle part;intracellular part;intrinsic to membrane;membrane;membrane part;membrane-bou…		5	5	5	65.3	65.3	65.3	11.142	323.31	19158000000	1543	4	5	5	5	5	5	5	5	5	5	5	5	5	5	5	5	5	5	5	5	5	5	5	5	5	5	5	5	5	5	5	1173000000
G5E8M7;O35660;D3YVP9;D3YVP8;A0A087WNU8	G5E8M7;O35660;D3YVP9	Glutathione S-transferase Mu 6	Gstm6		catalytic activity;glutathione transferase activity;transferase activity;transferase activity, transferring alkyl or aryl (other than methyl) groups	cell part;cytoplasm;intracellular part	Drug metabolism - cytochrome P450;Glutathione metabolism;Metabolism of xenobiotics by cytochrome P450	8	4	4	37.5	25	25	27.308	23.354	85179000	42	5	5	5	6	5	7	5	4	7	6	7	2	1	2	1	3	1	0	3	2	3	2	1	2	1	3	1	0	3	2	3	7683800
Q564E2;G5E8N5;P06151;D3Z736;D3YZQ9;D3YVR7;D3YZE4;Q548Z6;P00342;A0A0N4SVV8;D3Z7F0;P16125	Q564E2;G5E8N5;P06151;D3Z736;D3YZQ9	L-lactate dehydrogenase;L-lactate dehydrogenase A chain	Ldha	anatomical structure development;ATP biosynthetic process;ATP metabolic process;biosynthetic process;carbohydrate metabolic process;carboxylic acid biosynthetic process;carboxylic acid metabolic process;cell communication;cell motility;cellular biosynthetic process;cellular component movement;cellular ketone metabolic process;cellular metabolic process;cellular nitrogen compound biosynthetic proc…	binding;catalytic activity;coenzyme binding;cofactor binding;lactate dehydrogenase activity;L-lactate dehydrogenase activity;NAD binding;nucleotide binding;oxidoreductase activity;oxidoreductase activity, acting on CH-OH group of donors;oxidoreductase activity, acting on the CH-OH group of donors, NAD or NADP as acceptor	cell part;cell projection;cell projection part;cilium;cytoplasm;cytoplasmic part;cytosol;extracellular membrane-bounded organelle;extracellular organelle;extracellular region part;extracellular vesicular exosome;flagellar fibrous sheath;flagellum part;intracellular membrane-bounded organelle;intracellular organelle;intracellular organelle part;intracellular part;membrane;membrane-bounded organell…	Cysteine and methionine metabolism;Glycolysis / Gluconeogenesis;Propanoate metabolism;Pyruvate metabolism	17	17	17	64.5	64.5	64.5	36.498	323.31	7361400000	1084	12	13	13	12	14	12	13	13	15	14	15	13	13	12	14	12	13	13	15	14	15	13	13	12	14	12	13	13	15	14	15	412860000
G5E8R2;E9Q453;G5E8R1;E9Q456;G5E8R0;E9Q455;S4R261	G5E8R2;E9Q453;G5E8R1;E9Q456;G5E8R0;E9Q455		Tpm1	chordate embryonic development;developmental process;embryo development;embryo development ending in birth or egg hatching;in utero embryonic development	structural constituent of cytoskeleton;structural molecule activity	cell part;contractile fiber;contractile fiber part;cytoplasm;cytoplasmic part;cytoskeletal part;intracellular non-membrane-bounded organelle;intracellular organelle;intracellular organelle part;intracellular part;muscle thin filament tropomyosin;myofibril;non-membrane-bounded organelle;organelle;organelle part	Cardiac muscle contraction;Dilated cardiomyopathy;Hypertrophic cardiomyopathy (HCM)	11	7	3	35.9	25	13.7	28.696	61.023	405480000	79	7	7	6	9	8	10	8	8	9	8	11	5	4	6	6	7	7	5	5	5	7	3	2	3	2	3	3	3	3	2	3	38340000
H3BIY9;Q9DBG3;H3BKM0;H3BJ06	H3BIY9;Q9DBG3;H3BKM0	AP complex subunit beta;AP-2 complex subunit beta	Ap2b1	cellular component organization;cellular component organization or biogenesis;cellular membrane organization;cellular process;endocytosis;establishment of localization;establishment of localization in cell;establishment of protein localization;intracellular protein transport;intracellular transport;membrane invagination;membrane organization;protein transport;transport;vesicle-mediated transport	binding;clathrin binding;protein binding;protein transporter activity;substrate-specific transporter activity;transporter activity	AP-type membrane coat adaptor complex;cell part;clathrin adaptor complex;coated pit;cytoplasmic part;intracellular membrane-bounded organelle;intracellular organelle;intracellular part;macromolecular complex;membrane;membrane part;membrane-bounded organelle;organelle;plasma membrane;protein complex	Endocrine and other factor-regulated calcium reabsorption;Endocytosis;Huntington's disease	11	3	3	12.6	4.5	4.5	104.83	3.4089	121240000	20	4	5	3	3	4	5	8	8	6	8	6	2	2	2	1	2	2	2	2	3	2	2	2	2	1	2	2	2	2	3	2	5928700
H3BJ97;Q99JR5;H3BKM8	H3BJ97;Q99JR5	Tubulointerstitial nephritis antigen-like	Tinagl1	biological adhesion;cell adhesion;cellular process;immune response;immune system process;response to stimulus	binding;carbohydrate binding;cargo receptor activity;catalytic activity;cysteine-type peptidase activity;extracellular matrix binding;hydrolase activity;laminin binding;pattern binding;peptidase activity;peptidase activity, acting on L-amino acid peptides;polysaccharide binding;protein binding;receptor activity;scavenger receptor activity	cell part;cytoplasm;extracellular matrix;extracellular membrane-bounded organelle;extracellular organelle;extracellular region part;extracellular space;extracellular vesicular exosome;intracellular part;membrane-bounded organelle;membrane-bounded vesicle;organelle;vesicle		6	6	6	15.6	15.6	15.6	49.276	21.622	274750000	29	3	6	2	3	1	6	4	4	3	2	1	6	2	3	1	6	4	4	3	2	1	6	2	3	1	6	4	4	3	2	1	58510000
H3BKH6;Q9R0P3;H3BLJ9;H3BJL6;H3BJP2;H3BK43;H3BJC6;H3BL99	H3BKH6;Q9R0P3;H3BLJ9;H3BJL6;H3BJP2;H3BK43	S-formylglutathione hydrolase	Esd	aldehyde catabolic process;catabolic process;cellular aldehyde metabolic process;cellular catabolic process;cellular metabolic process;cellular process;formaldehyde catabolic process;formaldehyde metabolic process;metabolic process;small molecule catabolic process;small molecule metabolic process	carboxylic ester hydrolase activity;catalytic activity;hydrolase activity;hydrolase activity, acting on ester bonds;S-formylglutathione hydrolase activity;thiolester hydrolase activity	cell part;cytoplasm;cytoplasmic membrane-bounded vesicle;cytoplasmic part;cytoplasmic vesicle;extracellular membrane-bounded organelle;extracellular organelle;extracellular region part;extracellular vesicular exosome;Golgi apparatus;intracellular membrane-bounded organelle;intracellular organelle;intracellular organelle part;intracellular part;membrane;membrane-bounded organelle;membrane-bounded …	Methane metabolism	11	11	11	52.5	52.5	52.5	32.829	129.85	1272000000	310	8	5	6	5	5	7	6	5	10	8	10	5	6	5	5	7	6	5	10	8	10	5	6	5	5	7	6	5	10	8	10	59023000
H3BKR2;Q3TQ70;P62874;H3BLF7;Q54AE3;Q61011	H3BKR2;Q3TQ70;P62874;H3BLF7	Guanine nucleotide-binding protein G(I)/G(S)/G(T) subunit beta-1	Gnb1	activation of phospholipase C activity;activation of phospholipase C activity by G-protein coupled receptor protein signaling pathway coupled to IP3 second messenger;anatomical structure development;apoptosis;biological regulation;calcium ion homeostasis;cardiac muscle cell apoptosis;cation homeostasis;cell death;cell proliferation;cell surface receptor linked signaling pathway;cellular calcium i…	binding;catalytic activity;cytoskeletal protein binding;enzyme binding;GTPase activity;GTPase binding;hydrolase activity;hydrolase activity, acting on acid anhydrides;hydrolase activity, acting on acid anhydrides, in phosphorus-containing anhydrides;molecular transducer activity;nucleoside-triphosphatase activity;protein binding;protein complex binding;pyrophosphatase activity;signal transducer a…	cell body;cell part;cell projection;cell projection part;cilium;cilium part;cytoplasmic part;dendrite;extracellular membrane-bounded organelle;extracellular organelle;extracellular region part;extracellular vesicular exosome;extrinsic to internal side of plasma membrane;extrinsic to membrane;extrinsic to plasma membrane;heterotrimeric G-protein complex;intracellular organelle part;intracellular p…	Chemokine signaling pathway;Phototransduction;Taste transduction	8	4	4	28.5	14.2	14.2	30.3	2.2823	212840000	36	6	5	7	5	5	7	8	8	7	7	5	1	3	1	1	3	4	4	3	3	1	1	3	1	1	3	4	4	3	3	1	21313000
H3BL34;Q3UN14;Q64176	H3BL34;Q3UN14;Q64176	Carboxylic ester hydrolase;Carboxylesterase 1E	Ces1e	metabolic process	carboxylic ester hydrolase activity;catalytic activity;hydrolase activity;hydrolase activity, acting on ester bonds	cell part;cytoplasmic part;endoplasmic reticulum lumen;endoplasmic reticulum part;extracellular region part;extracellular space;intracellular organelle lumen;intracellular organelle part;intracellular part;membrane-enclosed lumen;organelle lumen;organelle part	Drug metabolism - other enzymes;Tropane, piperidine and pyridine alkaloid biosynthesis	14	10	10	32.3	23.5	23.5	61.51	79.852	532250000	113	3	8	12	12	11	8	9	12	9	7	8	4	8	8	7	4	5	8	5	3	4	4	8	8	7	4	5	8	5	3	4	28167000
H7BWY6;Q00724	H7BWY6;Q00724	Retinol-binding protein 4	Rbp4	alcohol biosynthetic process;alcohol metabolic process;anatomical structure development;anatomical structure formation involved in morphogenesis;anatomical structure homeostasis;anatomical structure morphogenesis;apocarotenoid metabolic process;biological regulation;biosynthetic process;carbohydrate biosynthetic process;carbohydrate homeostasis;carbohydrate metabolic process;cardiac muscle tissue…	binding;isoprenoid binding;lipid binding;retinal binding;retinoid binding;retinol binding;retinol transporter activity;transmembrane transporter activity;transporter activity;vitamin binding;vitamin transporter activity	extracellular membrane-bounded organelle;extracellular organelle;extracellular region part;extracellular space;extracellular vesicular exosome;macromolecular complex;membrane-bounded organelle;membrane-bounded vesicle;organelle;protein complex;vesicle		3	3	3	12.2	12.2	12.2	28.405	10.071	60305000	25	2	1	1	3	3	1	0	2	2	3	2	1	1	3	3	1	0	2	2	3	2	1	1	3	3	1	0	2	2	3	2	2839800
H7BWZ3;Q9JM76;A0A0G2JFK7;D3Z2F7;D3Z2F8	H7BWZ3;Q9JM76;A0A0G2JFK7;D3Z2F7;D3Z2F8	Actin-related protein 2/3 complex subunit 3	Arpc3	actin cytoskeleton organization;actin filament organization;actin filament-based process;actin nucleation;Arp2/3 complex-mediated actin nucleation;biological regulation;cellular component organization;cellular component organization at cellular level;cellular component organization or biogenesis;cellular component organization or biogenesis at cellular level;cellular process;cytoskeleton organiza…	structural constituent of cytoskeleton;structural molecule activity	adherens junction;anchoring junction;Arp2/3 protein complex;cell junction;cell part;cell projection;cell-substrate adherens junction;cell-substrate junction;cytoplasm;cytoskeletal part;extracellular membrane-bounded organelle;extracellular organelle;extracellular region part;extracellular vesicular exosome;focal adhesion;intracellular organelle part;intracellular part;lamellipodium;macromolecular…	Bacterial invasion of epithelial cells;Fc gamma R-mediated phagocytosis;Pathogenic Escherichia coli infection;Regulation of actin cytoskeleton;Shigellosis	4	4	4	24.7	24.7	24.7	19.637	11.913	243880000	35	5	2	1	2	1	2	2	2	3	2	3	2	1	2	1	2	2	2	3	2	3	2	1	2	1	2	2	2	3	2	3	23791000
H7BX01;P58281;E0CXD1;F6U775	H7BX01;P58281	Dynamin-like 120 kDa protein, mitochondrial;Dynamin-like 120 kDa protein, form S1	Opa1	aging;anatomical structure formation involved in morphogenesis;apoptosis;biological regulation;cell aging;cell death;cellular component organization;cellular component organization at cellular level;cellular component organization or biogenesis;cellular component organization or biogenesis at cellular level;cellular membrane fusion;cellular membrane organization;cellular process;cellular response…	binding;catalytic activity;GTP binding;GTPase activity;guanyl nucleotide binding;guanyl ribonucleotide binding;hydrolase activity;hydrolase activity, acting on acid anhydrides;hydrolase activity, acting on acid anhydrides, in phosphorus-containing anhydrides;nucleoside-triphosphatase activity;nucleotide binding;purine nucleotide binding;purine ribonucleoside triphosphate binding;purine ribonucleo…	cell part;cell projection;cytoplasm;cytoplasmic part;dendrite;integral to membrane;intracellular membrane-bounded organelle;intracellular organelle;intracellular organelle part;intracellular part;intrinsic to membrane;membrane;membrane part;membrane-bounded organelle;membrane-enclosed lumen;mitochondrial crista;mitochondrial inner membrane;mitochondrial intermembrane space;mitochondrial membrane;…		19	19	18	23.9	23.9	23.2	113.23	57.765	810300000	145	4	11	14	10	9	12	12	14	12	16	8	11	14	10	9	12	12	14	12	16	8	11	13	10	9	11	11	13	11	16	8	73412000
H7BX95;Q6PDM2;F7AI47	H7BX95;Q6PDM2	Serine/arginine-rich splicing factor 1	Srsf1	biological regulation;cardiac muscle contraction;cellular component assembly;cellular component assembly at cellular level;cellular component organization;cellular component organization at cellular level;cellular component organization or biogenesis;cellular component organization or biogenesis at cellular level;cellular macromolecular complex assembly;cellular macromolecular complex subunit org…	binding;mRNA binding;nucleic acid binding;nucleotide binding;protein binding;protein domain specific binding;RNA binding;RS domain binding	catalytic step 2 spliceosome;cell part;cytoplasm;exon-exon junction complex;extracellular membrane-bounded organelle;extracellular organelle;extracellular region part;extracellular vesicular exosome;intracellular membrane-bounded organelle;intracellular organelle;intracellular organelle part;intracellular part;macromolecular complex;membrane-bounded organelle;membrane-bounded vesicle;nuclear body…	Spliceosome	7	7	7	25.3	25.3	25.3	28.329	12.146	219750000	39	3	2	4	3	1	3	5	6	5	4	3	2	4	3	1	3	5	6	5	4	3	2	4	3	1	3	5	6	5	4	3	6364500
I7HLV2;Q6ZWV3;P86048;B7FAU6	I7HLV2;Q6ZWV3;P86048	60S ribosomal protein L10;60S ribosomal protein L10-like	Rpl10;Rpl10l	biosynthetic process;cellular biosynthetic process;cellular macromolecule biosynthetic process;cellular macromolecule metabolic process;cellular metabolic process;cellular process;cellular protein metabolic process;gamete generation;macromolecule biosynthetic process;macromolecule metabolic process;male gamete generation;metabolic process;multicellular organismal process;multicellular organismal …	structural constituent of ribosome;structural molecule activity	cell part;cytoplasmic part;cytosolic large ribosomal subunit;intracellular membrane-bounded organelle;intracellular non-membrane-bounded organelle;intracellular organelle;intracellular organelle part;intracellular part;large ribosomal subunit;macromolecular complex;membrane;membrane-bounded organelle;non-membrane-bounded organelle;nucleus;organelle;organelle part;polysome;ribonucleoprotein comple…	Ribosome	7	7	7	41.3	41.3	41.3	23.072	58.683	1490000000	223	4	4	5	4	5	4	4	5	7	5	5	4	5	4	5	4	4	5	7	5	5	4	5	4	5	4	4	5	7	5	5	94525000
J3KMM5;O55143;Q8R429;B1ATS4;B1ATS5;E9Q559;Q64518	J3KMM5;O55143	Calcium-transporting ATPase;Sarcoplasmic/endoplasmic reticulum calcium ATPase 2	Atp2a2	apoptosis;apoptosis in response to endoplasmic reticulum stress;apoptotic mitochondrial changes;biological regulation;calcium ion homeostasis;calcium ion import;calcium ion transmembrane transport;calcium ion transport;calcium-mediated signaling;cation homeostasis;cation transport;cell death;cellular calcium ion homeostasis;cellular cation homeostasis;cellular chemical homeostasis;cellular compon…	active transmembrane transporter activity;adenyl nucleotide binding;adenyl ribonucleotide binding;ATP binding;ATPase activity;ATPase activity, coupled;ATPase activity, coupled to movement of substances;ATPase activity, coupled to transmembrane movement of ions;ATPase activity, coupled to transmembrane movement of ions, phosphorylative mechanism;ATPase activity, coupled to transmembrane movement o…	cell junction;cell part;cell-cell contact zone;cell-cell junction;contractile fiber part;cytoplasmic part;endoplasmic reticulum;endoplasmic reticulum membrane;endoplasmic reticulum part;endoplasmic reticulum-Golgi intermediate compartment;H zone;I band;integral to membrane;intercalated disc;intracellular membrane-bounded organelle;intracellular organelle;intracellular organelle part;intracellular…	Alzheimer's disease;Calcium signaling pathway;Pancreatic secretion	28	28	28	31.1	31.1	31.1	114.86	95.018	2406300000	557	7	19	20	17	16	23	25	16	22	22	18	19	20	17	16	23	25	16	22	22	18	19	20	17	16	23	25	16	22	22	18	233230000
J3QNY6;Q9QY30	J3QNY6;Q9QY30	Bile salt export pump	Abcb11	bile acid and bile salt transport;canalicular bile acid transport;carboxylic acid transport;cellular process;establishment of localization;monocarboxylic acid transport;organic acid transport;organic substance transport;transmembrane transport;transport	active transmembrane transporter activity;adenyl nucleotide binding;adenyl ribonucleotide binding;ATP binding;ATPase activity;ATPase activity, coupled;ATPase activity, coupled to movement of substances;ATPase activity, coupled to transmembrane movement of substances;bile acid transmembrane transporter activity;binding;canalicular bile acid transmembrane transporter activity;carboxylic acid transm…	apical part of cell;cell junction;cell part;cell-cell junction;extracellular membrane-bounded organelle;extracellular organelle;extracellular region part;extracellular vesicular exosome;integral to membrane;intercellular canaliculus;intrinsic to membrane;membrane;membrane part;membrane-bounded organelle;membrane-bounded vesicle;organelle;vesicle	ABC transporters;Bile secretion	31	31	30	29.5	29.5	28.9	146.74	144.19	2837600000	641	2	25	23	25	21	25	26	24	21	20	20	25	23	25	21	25	26	24	21	20	20	24	23	25	21	24	26	24	21	20	20	243850000
J3QP56;P97823;D3Z269;D3Z111;D3YUG4;J3QQ63	J3QP56;P97823;D3Z269;D3Z111;D3YUG4	Acyl-protein thioesterase 1	Lypla1	biological regulation;carboxylic acid metabolic process;catabolic process;cellular catabolic process;cellular ketone metabolic process;cellular lipid metabolic process;cellular macromolecule catabolic process;cellular macromolecule metabolic process;cellular metabolic process;cellular process;cellular protein metabolic process;fatty acid metabolic process;lipid metabolic process;lipoprotein catab…	catalytic activity;hydrolase activity;hydrolase activity, acting on ester bonds;lipase activity;palmitoyl-(protein) hydrolase activity;thiolester hydrolase activity	cell part;cytoplasmic part;cytosol;extracellular membrane-bounded organelle;extracellular organelle;extracellular region part;extracellular vesicular exosome;intracellular membrane-bounded organelle;intracellular organelle;intracellular part;membrane-bounded organelle;membrane-bounded vesicle;mitochondrion;organelle;vesicle	Glycerophospholipid metabolism	6	6	6	32.6	32.6	32.6	23.726	114.07	1564100000	97	6	3	3	3	4	3	3	3	5	6	6	3	3	3	4	3	3	3	5	6	6	3	3	3	4	3	3	3	5	6	6	147030000
K3W4L7;Q9DCG6	K3W4L7;Q9DCG6	Phenazine biosynthesis-like domain-containing protein 1	Pbld1	anatomical structure homeostasis;biological regulation;biosynthetic process;digestive system process;epithelial structure maintenance;homeostatic process;maintenance of gastrointestinal epithelium;metabolic process;multicellular organismal process;negative regulation of biological process;negative regulation of cell communication;negative regulation of cell development;negative regulation of cell…	catalytic activity;isomerase activity	cell part;cytoplasm;extracellular membrane-bounded organelle;extracellular organelle;extracellular region part;extracellular vesicular exosome;intracellular part;membrane-bounded organelle;membrane-bounded vesicle;organelle;vesicle		15	15	8	63.3	63.3	40.8	32.189	126.96	523260000	106	2	9	10	11	11	10	8	8	12	10	13	9	10	11	11	10	8	8	12	10	13	4	4	6	6	5	3	4	5	4	6	43884000
K3W4R2;Q6URW6;A0A140LI60;A0A140LHX1	K3W4R2;Q6URW6	Myosin-14	Myh14	actin cytoskeleton organization;actin filament-based movement;actin filament-based process;actomyosin structure organization;anatomical structure development;anatomical structure morphogenesis;behavior;biological regulation;cell part morphogenesis;cellular chemical homeostasis;cellular component morphogenesis;cellular component movement;cellular component organization;cellular component organizat…	actin binding;actin filament binding;actin-dependent ATPase activity;adenyl nucleotide binding;adenyl ribonucleotide binding;ATP binding;ATPase activity;ATPase activity, coupled;binding;catalytic activity;cytoskeletal protein binding;hydrolase activity;hydrolase activity, acting on acid anhydrides;hydrolase activity, acting on acid anhydrides, in phosphorus-containing anhydrides;microfilament mot…	actin filament bundle;actomyosin;axon;brush border;cell part;cell projection;cell projection part;cytoplasm;cytoskeletal part;extracellular membrane-bounded organelle;extracellular organelle;extracellular region part;extracellular vesicular exosome;growth cone;intracellular organelle part;intracellular part;macromolecular complex;membrane;membrane-bounded organelle;membrane-bounded vesicle;myelin…	Tight junction;Viral myocarditis	13	8	8	6.5	4.4	4.4	228.56	15.024	256400000	62	4	8	7	7	6	7	7	10	6	6	7	3	3	2	2	2	2	5	2	2	3	3	3	2	2	2	2	5	2	2	3	22449000
K7N6C2	K7N6C2		Cyp2c68	arachidonic acid metabolic process;carboxylic acid metabolic process;catabolic process;cellular catabolic process;cellular ketone metabolic process;cellular lipid metabolic process;cellular metabolic process;cellular process;drug catabolic process;drug metabolic process;epoxygenase P450 pathway;exogenous drug catabolic process;fatty acid metabolic process;icosanoid metabolic process;lipid metabol…	arachidonic acid epoxygenase activity;arachidonic acid monooxygenase activity;binding;catalytic activity;cation binding;heme binding;ion binding;iron ion binding;metal ion binding;monooxygenase activity;oxidoreductase activity;oxidoreductase activity, acting on paired donors, with incorporation or reduction of molecular oxygen;oxidoreductase activity, acting on paired donors, with incorporation o…	cell part;cytoplasm;intracellular membrane-bounded organelle;intracellular organelle;intracellular part;membrane-bounded organelle;organelle	Arachidonic acid metabolism;Drug metabolism - cytochrome P450;Linoleic acid metabolism;Metabolism of xenobiotics by cytochrome P450;Retinol metabolism	18	2	2	41.8	4.7	4.7	56.057	27.105	127620000	73	1	11	14	13	10	16	17	12	16	13	14	1	1	2	1	2	2	1	2	2	1	1	1	2	1	2	2	1	2	2	1	12458000
K7Q7T7;Q3TLP8;P63001;Q14A12;P60764;A2AC13;Q05144	K7Q7T7;Q3TLP8;P63001;Q14A12;P60764;A2AC13;Q05144	Ras-related C3 botulinum toxin substrate 1;Ras-related C3 botulinum toxin substrate 3;Ras-related C3 botulinum toxin substrate 2	Rac1;Rac3;Rac2	actin cytoskeleton organization;actin filament organization;actin filament polymerization;actin filament-based process;actin polymerization or depolymerization;anatomical structure arrangement;anatomical structure development;anatomical structure homeostasis;anatomical structure morphogenesis;auditory receptor cell morphogenesis;axon guidance;biological adhesion;biological regulation;bone resorpt…	binding;calcium-dependent protein binding;catalytic activity;enzyme binding;enzyme regulator activity;GDP-dissociation inhibitor binding;GTP binding;GTPase activity;GTP-dependent protein binding;guanyl nucleotide binding;guanyl ribonucleotide binding;hydrolase activity;hydrolase activity, acting on acid anhydrides;hydrolase activity, acting on acid anhydrides, in phosphorus-containing anhydrides;…	actin filament;adherens junction;anchoring junction;cell body;cell junction;cell part;cell periphery;cell projection;cell projection membrane;cell projection part;cell-substrate adherens junction;cell-substrate junction;cytoplasm;cytoplasmic membrane-bounded vesicle;cytoplasmic part;cytoplasmic vesicle;cytoskeletal part;cytosol;early endosome membrane;endomembrane system;endosomal part;endosome m…	Adherens junction;Amyotrophic lateral sclerosis (ALS);Axon guidance;B cell receptor signaling pathway;Bacterial invasion of epithelial cells;Chemokine signaling pathway;Colorectal cancer;Epithelial cell signaling in Helicobacter pylori infection;Fc epsilon RI signaling pathway;Fc gamma R-mediated phagocytosis;Focal adhesion;Leukocyte transendothelial migration;MAPK signaling pathway;Natural kille…	6	5	5	34.4	28.6	28.6	21.45	36.05	941950000	178	7	4	4	3	3	6	4	5	4	4	4	4	4	3	3	5	4	5	4	4	4	4	4	3	3	5	4	5	4	4	4	99010000
K9J7B2;D3Z748;Q6ZQM8;D3YZE6;D3Z7G0;D3YZ96;G3UZC9;D6RH94	K9J7B2		Ugt1a6b	alcohol metabolic process;aromatic compound biosynthetic process;biological regulation;biosynthetic process;carbohydrate metabolic process;carboxylic acid metabolic process;cellular aromatic compound metabolic process;cellular biosynthetic process;cellular carbohydrate metabolic process;cellular glucuronidation;cellular ketone metabolic process;cellular metabolic process;cellular process;cellular…	binding;carboxylic acid binding;catalytic activity;drug binding;enzyme binding;enzyme inhibitor activity;enzyme regulator activity;fatty acid binding;glucuronosyltransferase activity;identical protein binding;kinase binding;lipid binding;monocarboxylic acid binding;protein binding;protein dimerization activity;protein heterodimerization activity;protein homodimerization activity;protein kinase bi…	cell part;cytoplasmic part;endoplasmic reticulum;endoplasmic reticulum membrane;endoplasmic reticulum part;extracellular membrane-bounded organelle;extracellular organelle;extracellular region part;extracellular vesicular exosome;integral to membrane;intracellular membrane-bounded organelle;intracellular organelle;intracellular organelle part;intracellular part;intrinsic to membrane;membrane;memb…	Ascorbate and aldarate metabolism;Drug metabolism - cytochrome P450;Drug metabolism - other enzymes;Metabolism of xenobiotics by cytochrome P450;Other types of O-glycan biosynthesis;Pentose and glucuronate interconversions;Porphyrin and chlorophyll metabolism;Retinol metabolism;Starch and sucrose metabolism;Steroid hormone biosynthesis	22	5	5	60.5	10.9	10.9	60.49	48.378	571660000	232	8	16	17	16	17	17	17	18	17	17	16	4	5	4	4	4	4	4	4	4	3	4	5	4	4	4	4	4	4	4	3	69746000
O08601	O08601	Microsomal triglyceride transfer protein large subunit	Mttp	acylglycerol metabolic process;alcohol metabolic process;biological regulation;cellular lipid metabolic process;cellular macromolecule metabolic process;cellular metabolic process;cellular process;cellular protein metabolic process;chemical homeostasis;cholesterol homeostasis;cholesterol metabolic process;circadian rhythm;establishment of localization;establishment of protein localization;glycero…	binding;lipid binding;lipid transporter activity;substrate-specific transporter activity;transporter activity	basolateral plasma membrane;brush border membrane;cell part;cell projection membrane;cell projection part;cytoplasmic part;endoplasmic reticulum;Golgi apparatus;intracellular membrane-bounded organelle;intracellular organelle;intracellular part;macromolecular complex;membrane part;membrane-bounded organelle;membrane-bounded vesicle;microvillus membrane;organelle;plasma membrane part;protein compl…	Fat digestion and absorption	41	41	41	51.6	51.6	51.6	99.098	323.31	9881500000	2607	1	35	35	33	32	35	33	32	31	33	30	35	35	33	32	35	33	32	31	33	30	35	35	33	32	35	33	32	31	33	30	1258300000
O08749	O08749	Dihydrolipoyl dehydrogenase, mitochondrial	Dld	anatomical structure morphogenesis;biological regulation;cell maturation;cell redox homeostasis;cellular chemical homeostasis;cellular developmental process;cellular homeostasis;cellular ion homeostasis;cellular metabolic process;cellular process;cellular process involved in reproduction;chemical homeostasis;developmental maturation;developmental process;developmental process involved in reproduc…	binding;catalytic activity;coenzyme binding;cofactor binding;dihydrolipoyl dehydrogenase activity;flavin adenine dinucleotide binding;oxidoreductase activity;oxidoreductase activity, acting on a sulfur group of donors;oxidoreductase activity, acting on a sulfur group of donors, NAD or NADP as acceptor;oxidoreductase activity, acting on NADH or NADPH	acrosomal matrix;cell part;cell projection;cilium;cytoplasmic part;cytoplasmic vesicle part;intracellular membrane-bounded organelle;intracellular organelle;intracellular organelle lumen;intracellular organelle part;intracellular part;membrane-bounded organelle;membrane-enclosed lumen;mitochondrial matrix;mitochondrial part;mitochondrion;myelin sheath;nuclear part;nucleoplasm;organelle;organelle …	Citrate cycle (TCA cycle);Glycine, serine and threonine metabolism;Glycolysis / Gluconeogenesis;Pyruvate metabolism;Valine, leucine and isoleucine degradation	12	12	12	27.9	27.9	27.9	54.272	63.572	752060000	190	1	6	5	3	5	8	5	6	11	8	6	6	5	3	5	8	5	6	11	8	6	6	5	3	5	8	5	6	11	8	6	41622000
O08795	O08795	Glucosidase 2 subunit beta	Prkcsh	anatomical structure development;biological regulation;carbohydrate metabolic process;cellular component assembly;cellular component organization;cellular component organization or biogenesis;chordate embryonic development;developmental process;embryo development;embryo development ending in birth or egg hatching;in utero embryonic development;liver development;macromolecular complex assembly;mac…	binding;calcium ion binding;cation binding;enzyme binding;ion binding;ion channel binding;kinase binding;metal ion binding;nucleic acid binding;phosphoprotein binding;protein binding;protein kinase binding;protein kinase C binding;RNA binding	cell part;cytoplasmic part;endoplasmic reticulum;intracellular membrane-bounded organelle;intracellular organelle;intracellular part;membrane-bounded organelle;organelle	Protein processing in endoplasmic reticulum	12	12	12	23.2	23.2	23.2	58.792	150.81	2052500000	299	1	10	8	7	7	11	10	12	10	8	9	10	8	7	7	11	10	12	10	8	9	10	8	7	7	11	10	12	10	8	9	160080000
O08807;B1AZS9	O08807;B1AZS9	Peroxiredoxin-4	Prdx4	4-hydroxyproline metabolic process;amine metabolic process;anatomical structure development;biological regulation;carboxylic acid metabolic process;cell redox homeostasis;cellular amine metabolic process;cellular amino acid metabolic process;cellular component organization;cellular component organization at cellular level;cellular component organization or biogenesis;cellular component organizati…	antioxidant activity;binding;catalytic activity;identical protein binding;oxidoreductase activity;oxidoreductase activity, acting on paired donors, with incorporation or reduction of molecular oxygen;oxidoreductase activity, acting on peroxide as acceptor;peroxidase activity;peroxiredoxin activity;protein binding;protein dimerization activity;protein homodimerization activity	cell part;cytoplasm;cytoplasmic part;cytosol;endoplasmic reticulum;extracellular membrane-bounded organelle;extracellular organelle;extracellular region part;extracellular space;extracellular vesicular exosome;intracellular membrane-bounded organelle;intracellular organelle;intracellular part;membrane-bounded organelle;membrane-bounded vesicle;mitochondrion;nucleus;organelle;smooth endoplasmic re…		9	7	7	40.1	33.6	33.6	31.052	33.772	1236100000	211	2	5	6	6	6	7	4	6	7	6	6	4	5	5	5	5	3	4	6	5	5	4	5	5	5	5	3	4	6	5	5	120220000
O08914	O08914	Fatty-acid amide hydrolase 1	Faah	carboxylic acid catabolic process;carboxylic acid metabolic process;catabolic process;cellular catabolic process;cellular ketone metabolic process;cellular lipid catabolic process;cellular lipid metabolic process;cellular metabolic process;cellular process;fatty acid catabolic process;fatty acid metabolic process;lipid catabolic process;lipid metabolic process;metabolic process;monocarboxylic aci…	acylglycerol lipase activity;carbon-nitrogen ligase activity, with glutamine as amido-N-donor;carboxylic ester hydrolase activity;catalytic activity;fatty acid amide hydrolase activity;hydrolase activity;hydrolase activity, acting on carbon-nitrogen (but not peptide) bonds;hydrolase activity, acting on carbon-nitrogen (but not peptide) bonds, in linear amides;hydrolase activity, acting on ester b…	cell part;cytoplasmic part;endoplasmic reticulum membrane;endoplasmic reticulum part;Golgi apparatus part;Golgi membrane;integral to membrane;intracellular organelle part;intracellular part;intrinsic to membrane;membrane;membrane part;organelle membrane;organelle part		10	10	10	24.2	24.2	24.2	63.221	92.102	821790000	244	1	6	7	8	6	9	8	6	9	7	4	6	7	8	6	9	8	6	9	7	4	6	7	8	6	9	8	6	9	7	4	59268000
O08966	O08966	Solute carrier family 22 member 1	Slc22a1	amine transport;biological regulation;catecholamine transport;cation transport;cellular component assembly;cellular component organization;cellular component organization or biogenesis;cellular process;dopamine transport;drug transmembrane transport;drug transport;epinephrine transport;establishment of localization;establishment or maintenance of transmembrane electrochemical gradient;hormone tra…	acetylcholine transmembrane transporter activity;active transmembrane transporter activity;alcohol transmembrane transporter activity;amine transmembrane transporter activity;cation transmembrane transporter activity;dopamine transmembrane transporter activity;inorganic cation transmembrane transporter activity;ion transmembrane transporter activity;monoamine transmembrane transporter activity;ne…	basolateral plasma membrane;cell part;integral to membrane;integral to plasma membrane;intrinsic to membrane;intrinsic to plasma membrane;membrane part;plasma membrane part	Bile secretion	4	4	4	7.7	7.7	7.7	61.52	12.225	346980000	48	1	2	2	2	2	3	4	2	3	2	1	2	2	2	2	3	4	2	3	2	1	2	2	2	2	3	4	2	3	2	1	49784000
Q6RI64;O09061	Q6RI64;O09061	Proteasome subunit beta type;Proteasome subunit beta type-1	Psmb1	catabolic process;cellular catabolic process;cellular macromolecule catabolic process;cellular macromolecule metabolic process;cellular metabolic process;cellular process;macromolecule catabolic process;macromolecule metabolic process;metabolic process;modification-dependent macromolecule catabolic process;modification-dependent protein catabolic process;primary metabolic process;proteasomal prot…	catalytic activity;endopeptidase activity;hydrolase activity;peptidase activity;peptidase activity, acting on L-amino acid peptides;threonine-type endopeptidase activity;threonine-type peptidase activity	cell part;cytoplasm;cytoplasmic part;cytosol;extracellular membrane-bounded organelle;extracellular organelle;extracellular region part;extracellular vesicular exosome;intracellular membrane-bounded organelle;intracellular organelle;intracellular part;macromolecular complex;membrane-bounded organelle;membrane-bounded vesicle;nucleus;organelle;proteasome complex;proteasome core complex;protein com…	Proteasome	6	6	6	35.4	35.4	35.4	26.372	9.9449	136950000	16	2	1	2	1	2	2	3	2	5	2	3	1	2	1	2	2	3	2	5	2	3	1	2	1	2	2	3	2	5	2	3	3499500
O09111	O09111	NADH dehydrogenase [ubiquinone] 1 beta subcomplex subunit 11, mitochondrial	Ndufb11	metabolic process;oxidation-reduction process		cell part;cytoplasmic part;integral to membrane;intracellular membrane-bounded organelle;intracellular organelle;intracellular organelle part;intracellular part;intrinsic to membrane;macromolecular complex;membrane part;membrane-bounded organelle;mitochondrial membrane part;mitochondrial part;mitochondrial respiratory chain complex I;mitochondrion;NADH dehydrogenase complex;organelle;organelle pa…	Alzheimer's disease;Huntington's disease;Oxidative phosphorylation;Parkinson's disease	2	2	2	17.9	17.9	17.9	17.444	1.9286	437770000	48	1	2	2	2	2	2	2	2	1	2	2	2	2	2	2	2	2	2	1	2	2	2	2	2	2	2	2	2	1	2	2	34123000
O09131;D3Z1Q9;Q8K2Q2	O09131	Glutathione S-transferase omega-1	Gsto1	biological regulation;carboxylic acid metabolic process;catabolic process;cellular catabolic process;cellular ketone metabolic process;cellular metabolic process;cellular process;cellular response to arsenic-containing substance;cellular response to chemical stimulus;cellular response to inorganic substance;cellular response to stimulus;L-ascorbic acid metabolic process;metabolic process;negative…	antioxidant activity;catalytic activity;disulfide oxidoreductase activity;glutathione dehydrogenase (ascorbate) activity;glutathione disulfide oxidoreductase activity;glutathione transferase activity;methylarsonate reductase activity;oxidoreductase activity;oxidoreductase activity, acting on a sulfur group of donors;oxidoreductase activity, acting on a sulfur group of donors, quinone or similar c…	cell part;cytoplasm;cytoplasmic part;cytosol;extracellular membrane-bounded organelle;extracellular organelle;extracellular region part;extracellular vesicular exosome;intracellular part;membrane-bounded organelle;membrane-bounded vesicle;organelle;vesicle	Drug metabolism - cytochrome P450;Glutathione metabolism;Metabolism of xenobiotics by cytochrome P450	9	9	9	37.1	37.1	37.1	27.497	23.904	755650000	152	3	3	5	5	6	7	6	6	9	6	9	3	5	5	6	7	6	6	9	6	9	3	5	5	6	7	6	6	9	6	9	16384000
Q9CQM8;O09167;A0A140T8K5	Q9CQM8;O09167	60S ribosomal protein L21	Rpl21	biosynthetic process;cellular biosynthetic process;cellular macromolecule biosynthetic process;cellular macromolecule metabolic process;cellular metabolic process;cellular process;cellular protein metabolic process;macromolecule biosynthetic process;macromolecule metabolic process;metabolic process;primary metabolic process;protein metabolic process;translation	structural constituent of ribosome;structural molecule activity	cell part;cytoplasm;cytosolic large ribosomal subunit;intracellular non-membrane-bounded organelle;intracellular organelle;intracellular organelle part;intracellular part;large ribosomal subunit;macromolecular complex;membrane;non-membrane-bounded organelle;nuclear part;nucleolus;organelle;organelle part;ribonucleoprotein complex	Ribosome	3	3	3	21.2	21.2	21.2	18.579	17.473	638130000	114	3	2	2	1	1	3	2	2	3	3	3	2	2	1	1	3	2	2	3	3	3	2	2	1	1	3	2	2	3	3	3	23441000
O09173	O09173	Homogentisate 1,2-dioxygenase	Hgd	amine catabolic process;amine metabolic process;aromatic amino acid family catabolic process;aromatic amino acid family metabolic process;aromatic compound catabolic process;carboxylic acid catabolic process;carboxylic acid metabolic process;catabolic process;cellular amine metabolic process;cellular amino acid catabolic process;cellular amino acid metabolic process;cellular aromatic compound met…	binding;catalytic activity;cation binding;dioxygenase activity;homogentisate 1,2-dioxygenase activity;ion binding;metal ion binding;oxidoreductase activity;oxidoreductase activity, acting on single donors with incorporation of molecular oxygen;oxidoreductase activity, acting on single donors with incorporation of molecular oxygen, incorporation of two atoms of oxygen	extracellular membrane-bounded organelle;extracellular organelle;extracellular region part;extracellular vesicular exosome;membrane-bounded organelle;membrane-bounded vesicle;organelle;vesicle	Styrene degradation;Tyrosine metabolism	15	15	15	50.3	50.3	50.3	49.959	223.53	3264900000	1211	1	13	11	10	12	14	12	14	13	12	12	13	11	10	12	14	12	14	13	12	12	13	11	10	12	14	12	14	13	12	12	188680000
O09174	O09174	Alpha-methylacyl-CoA racemase	Amacr	bile acid biosynthetic process;bile acid metabolic process;biosynthetic process;carboxylic acid biosynthetic process;carboxylic acid metabolic process;catabolic process;cellular biosynthetic process;cellular catabolic process;cellular ketone metabolic process;cellular lipid catabolic process;cellular lipid metabolic process;cellular metabolic process;cellular process;fatty acid metabolic process;…	alpha-methylacyl-CoA racemase activity;binding;catalytic activity;isomerase activity;protein binding;racemase and epimerase activity;receptor binding	cell part;cytoplasm;cytoplasmic part;intracellular membrane-bounded organelle;intracellular organelle;intracellular part;membrane-bounded organelle;microbody;mitochondrion;organelle;peroxisome	Peroxisome;Primary bile acid biosynthesis	12	12	12	48	48	48	41.704	143.49	864210000	208	1	7	8	6	6	8	9	8	9	7	10	7	8	6	6	8	9	8	9	7	10	7	8	6	6	8	9	8	9	7	10	66985000
O35114	O35114	Lysosome membrane protein 2	Scarb2	biological adhesion;cell adhesion;cellular process;establishment of localization;establishment of localization in cell;establishment of protein localization;establishment of protein localization to organelle;establishment of protein localization to vacuole;intracellular protein transport;intracellular transport;lysosomal transport;protein targeting;protein targeting to lysosome;protein targeting …	binding;enzyme binding;protein binding;receptor activity	adherens junction;anchoring junction;cell junction;cell part;cell-substrate adherens junction;cell-substrate junction;cytoplasmic part;extracellular membrane-bounded organelle;extracellular organelle;extracellular region part;extracellular vesicular exosome;focal adhesion;integral to membrane;intracellular organelle lumen;intracellular organelle part;intracellular part;intrinsic to membrane;lysos…	Lysosome	11	11	11	32.4	32.4	32.4	54.043	323.31	1335000000	380	1	10	9	8	9	11	10	10	4	6	6	10	9	8	9	11	10	10	4	6	6	10	9	8	9	11	10	10	4	6	6	174100000
Q3V235;O35129;F6QPR1;F6Q8V7	Q3V235;O35129;F6QPR1	Prohibitin-2	Phb2	anatomical structure development;anatomical structure morphogenesis;biological regulation;biosynthetic process;branching involved in mammary gland duct morphogenesis;branching morphogenesis of a tube;cellular biosynthetic process;cellular macromolecule biosynthetic process;cellular macromolecule metabolic process;cellular metabolic process;cellular nitrogen compound metabolic process;cellular pro…		cell part;cell surface;cytoplasmic part;extracellular membrane-bounded organelle;extracellular organelle;extracellular region part;extracellular vesicular exosome;intracellular membrane-bounded organelle;intracellular organelle;intracellular organelle part;intracellular part;macromolecular complex;membrane;membrane-bounded organelle;membrane-bounded vesicle;mitochondrial inner membrane;mitochondr…		17	17	17	64.2	64.2	64.2	33.296	323.31	14484000000	2298	4	15	15	16	16	15	14	15	17	16	16	15	15	16	16	15	14	15	17	16	16	15	15	16	16	15	14	15	17	16	16	1726500000
Q3UNI8;O35215;G3UZN1	Q3UNI8;O35215;G3UZN1	D-dopachrome decarboxylase	Ddt	biosynthetic process;cellular biosynthetic process;cellular metabolic process;cellular process;melanin biosynthetic process;melanin metabolic process;metabolic process;pigment biosynthetic process;pigment metabolic process;secondary metabolic process	carbon-carbon lyase activity;carboxy-lyase activity;catalytic activity;D-dopachrome decarboxylase activity;lyase activity	cell part;cytoplasm;extracellular membrane-bounded organelle;extracellular organelle;extracellular region part;extracellular vesicular exosome;intracellular part;membrane-bounded organelle;membrane-bounded vesicle;organelle;vesicle		10	10	4	95.8	95.8	37.3	13.077	303.33	1743500000	242	3	6	7	5	8	7	5	8	10	9	10	6	7	5	8	7	5	8	10	9	10	2	2	1	3	2	1	2	4	3	4	67533000
Q3TPC7;O35386	Q3TPC7;O35386	Phytanoyl-CoA dioxygenase, peroxisomal	Phyh	carboxylic acid catabolic process;carboxylic acid metabolic process;catabolic process;cellular catabolic process;cellular ketone metabolic process;cellular lipid catabolic process;cellular lipid metabolic process;cellular metabolic process;cellular process;fatty acid alpha-oxidation;fatty acid catabolic process;fatty acid metabolic process;fatty acid oxidation;isoprenoid metabolic process;lipid c…	binding;carboxylic acid binding;catalytic activity;cation binding;cofactor binding;ion binding;L-ascorbic acid binding;metal ion binding;oxidoreductase activity;oxidoreductase activity, acting on paired donors, with incorporation or reduction of molecular oxygen;oxidoreductase activity, acting on paired donors, with incorporation or reduction of molecular oxygen, 2-oxoglutarate as one donor, and …	cell part;cytoplasmic part;intracellular membrane-bounded organelle;intracellular organelle;intracellular part;membrane-bounded organelle;microbody;mitochondrion;organelle;peroxisome	Peroxisome	10	10	10	38.8	38.8	38.8	38.607	110.95	662440000	170	2	4	5	3	3	5	5	4	6	6	9	4	5	3	3	5	5	4	6	6	9	4	5	3	3	5	5	4	6	6	9	43436000
O35423	O35423	Serine--pyruvate aminotransferase, mitochondrial	Agxt	acid secretion;alanine catabolic process;alanine metabolic process;aldehyde catabolic process;amine biosynthetic process;amine catabolic process;amine metabolic process;anion transport;biosynthetic process;carboxylic acid biosynthetic process;carboxylic acid catabolic process;carboxylic acid metabolic process;carboxylic acid transport;catabolic process;cellular aldehyde metabolic process;cellular…	alanine-glyoxylate transaminase activity;amine binding;amino acid binding;binding;carboxylic acid binding;catalytic activity;cofactor binding;identical protein binding;protein binding;protein dimerization activity;protein homodimerization activity;pyridoxal phosphate binding;receptor binding;serine-pyruvate transaminase activity;transaminase activity;transferase activity;transferase activity, tra…	cell part;cytoplasmic part;intracellular membrane-bounded organelle;intracellular organelle;intracellular organelle lumen;intracellular organelle part;intracellular part;membrane-bounded organelle;membrane-enclosed lumen;microbody;microbody lumen;microbody part;mitochondrial matrix;mitochondrial part;mitochondrion;organelle;organelle lumen;organelle part;peroxisomal matrix;peroxisomal part;peroxi…	Alanine, aspartate and glutamate metabolism;Glycine, serine and threonine metabolism;Methane metabolism;Peroxisome	13	13	13	40.3	40.3	40.3	45.912	189.38	1648800000	332	1	6	6	6	3	8	7	7	12	11	11	6	6	6	3	8	7	7	12	11	11	6	6	6	3	8	7	7	12	11	11	74660000
O35459;F7B227	O35459;F7B227	Delta(3,5)-Delta(2,4)-dienoyl-CoA isomerase, mitochondrial	Ech1	carboxylic acid catabolic process;carboxylic acid metabolic process;catabolic process;cellular catabolic process;cellular ketone metabolic process;cellular lipid catabolic process;cellular lipid metabolic process;cellular metabolic process;cellular process;fatty acid beta-oxidation;fatty acid catabolic process;fatty acid metabolic process;fatty acid oxidation;lipid catabolic process;lipid metabol…	binding;catalytic activity;isomerase activity;protein binding;receptor binding	cell part;cytoplasmic part;extracellular membrane-bounded organelle;extracellular organelle;extracellular region part;extracellular vesicular exosome;intracellular membrane-bounded organelle;intracellular organelle;intracellular part;membrane;membrane-bounded organelle;membrane-bounded vesicle;microbody;mitochondrion;organelle;peroxisome;vesicle	Peroxisome	11	11	11	48	48	48	36.118	55.448	1125000000	220	2	7	7	8	8	9	8	8	9	8	9	7	7	8	8	9	8	8	9	8	9	7	7	8	8	9	8	8	9	8	9	85015000
O35488;A2ANX6	O35488;A2ANX6	Very long-chain acyl-CoA synthetase	Slc27a2	bile acid biosynthetic process;bile acid metabolic process;biosynthetic process;carboxylic acid biosynthetic process;carboxylic acid catabolic process;carboxylic acid metabolic process;carboxylic acid transport;catabolic process;cellular biosynthetic process;cellular catabolic process;cellular ketone metabolic process;cellular lipid catabolic process;cellular lipid metabolic process;cellular meta…	acid-thiol ligase activity;adenyl nucleotide binding;adenyl ribonucleotide binding;ATP binding;binding;catalytic activity;enzyme binding;fatty acid ligase activity;fatty acid transporter activity;ligase activity;ligase activity, forming carbon-sulfur bonds;lipid transporter activity;long-chain fatty acid-CoA ligase activity;nucleotide binding;phytanate-CoA ligase activity;pristanate-CoA ligase ac…	cell part;cytoplasmic part;endoplasmic reticulum;endoplasmic reticulum lumen;endoplasmic reticulum membrane;endoplasmic reticulum part;extracellular membrane-bounded organelle;extracellular organelle;extracellular region part;extracellular vesicular exosome;integral to endoplasmic reticulum membrane;integral to membrane;integral to organelle membrane;integral to peroxisomal membrane;intracellular…	Peroxisome;PPAR signaling pathway	43	43	43	63.2	63.2	63.2	70.422	323.31	13355000000	2379	2	29	30	28	33	24	26	26	33	34	34	29	30	28	33	24	26	26	33	34	34	29	30	28	33	24	26	26	33	34	34	1601800000
O35490;Q91WS4	O35490	Betaine--homocysteine S-methyltransferase 1	Bhmt	amine biosynthetic process;amine metabolic process;aspartate family amino acid biosynthetic process;aspartate family amino acid metabolic process;betaine catabolic process;betaine metabolic process;biosynthetic process;carboxylic acid biosynthetic process;carboxylic acid metabolic process;catabolic process;cellular amine metabolic process;cellular amino acid biosynthetic process;cellular amino ac…	betaine-homocysteine S-methyltransferase activity;binding;catalytic activity;cation binding;homocysteine S-methyltransferase activity;ion binding;metal ion binding;methyltransferase activity;S-adenosylmethionine-dependent methyltransferase activity;S-methyltransferase activity;transferase activity;transferase activity, transferring one-carbon groups;transition metal ion binding;zinc ion binding	cell part;cytoplasm;cytoplasmic part;cytosol;extracellular membrane-bounded organelle;extracellular organelle;extracellular region part;extracellular vesicular exosome;intracellular part;membrane-bounded organelle;membrane-bounded vesicle;organelle;vesicle	Cysteine and methionine metabolism;Glycine, serine and threonine metabolism	24	24	24	76.9	76.9	76.9	45.02	323.31	65426000000	6090	2	22	23	23	23	23	22	23	22	24	23	22	23	23	23	23	22	23	22	24	23	22	23	23	23	23	22	23	22	24	23	4633100000
O35593	O35593	26S proteasome non-ATPase regulatory subunit 14	Psmd14	biological regulation;cellular macromolecule metabolic process;cellular metabolic process;cellular nitrogen compound metabolic process;cellular process;cellular protein metabolic process;cellular response to stimulus;cellular response to stress;DNA metabolic process;DNA recombination;DNA repair;double-strand break repair;double-strand break repair via homologous recombination;double-strand break …	binding;catalytic activity;cation binding;endopeptidase activator activity;endopeptidase activity;endopeptidase regulator activity;enzyme activator activity;enzyme regulator activity;hydrolase activity;ion binding;metal ion binding;metallopeptidase activity;peptidase activator activity;peptidase activity;peptidase activity, acting on L-amino acid peptides;peptidase regulator activity;proteasome b…	cell part;extracellular membrane-bounded organelle;extracellular organelle;extracellular region part;extracellular vesicular exosome;intracellular membrane-bounded organelle;intracellular organelle;intracellular part;macromolecular complex;membrane-bounded organelle;membrane-bounded vesicle;nucleus;organelle;proteasome accessory complex;proteasome complex;proteasome regulatory particle, lid subco…	Proteasome	4	4	4	18.1	18.1	18.1	34.577	11.649	248770000	67	1	2	2	2	2	3	2	2	3	3	2	2	2	2	2	3	2	2	3	3	2	2	2	2	2	3	2	2	3	3	2	27543000
O35604	O35604	Niemann-Pick C1 protein	Npc1	adult behavior;adult locomotory behavior;adult walking behavior;alcohol metabolic process;autophagy;behavior;bile acid metabolic process;biological regulation;carbohydrate metabolic process;carboxylic acid metabolic process;catabolic process;cellular carbohydrate metabolic process;cellular catabolic process;cellular component organization;cellular component organization or biogenesis;cellular ket…	binding;cholesterol binding;hedgehog receptor activity;lipid binding;molecular transducer activity;receptor activity;signal transducer activity;signaling receptor activity;steroid binding;sterol binding;transmembrane signaling receptor activity	cell part;cytoplasmic part;endoplasmic reticulum;endosomal part;endosome;endosome membrane;envelope;extracellular membrane-bounded organelle;extracellular organelle;extracellular region;extracellular region part;extracellular vesicular exosome;Golgi apparatus;integral to membrane;integral to plasma membrane;intracellular membrane-bounded organelle;intracellular organelle;intracellular organelle p…	Lysosome	3	3	3	2.3	2.3	2.3	142.88	11.9	201800000	59	1	1	2	2	1	1	1	3	1	2	1	1	2	2	1	1	1	3	1	2	1	1	2	2	1	1	1	3	1	2	1	7521700
O35728;A0A087WS15	O35728	Cytochrome P450 4A14	Cyp4a14	anatomical structure development;biosynthetic process;carboxylic acid biosynthetic process;carboxylic acid metabolic process;cellular biosynthetic process;cellular ketone metabolic process;cellular lipid metabolic process;cellular metabolic process;cellular process;developmental process;fatty acid biosynthetic process;fatty acid metabolic process;icosanoid biosynthetic process;icosanoid metabolic…	alkane 1-monooxygenase activity;arachidonic acid binding;arachidonic acid monooxygenase activity;binding;carboxylic acid binding;catalytic activity;cation binding;fatty acid binding;heme binding;icosanoid binding;icosatetraenoic acid binding;ion binding;iron ion binding;lipid binding;metal ion binding;monocarboxylic acid binding;monooxygenase activity;oxidoreductase activity;oxidoreductase activi…	cell part;cytoplasmic part;endoplasmic reticulum membrane;endoplasmic reticulum part;intracellular organelle part;intracellular part;membrane;membrane part;organelle membrane;organelle part	Arachidonic acid metabolism;Fatty acid metabolism;PPAR signaling pathway;Retinol metabolism;Vascular smooth muscle contraction	27	27	22	66.5	66.5	55.8	58.719	323.31	7363700000	1728	2	20	22	20	21	19	22	14	21	21	20	20	22	20	21	19	22	14	21	21	20	17	18	16	17	15	19	10	18	18	17	749840000
O35857	O35857	Mitochondrial import inner membrane translocase subunit TIM44	Timm44	cellular process;establishment of localization;establishment of localization in cell;establishment of protein localization;establishment of protein localization in mitochondrion;establishment of protein localization to organelle;intracellular protein transmembrane transport;intracellular protein transport;intracellular transport;mitochondrial transport;protein import;protein import into mitochond…	active transmembrane transporter activity;adenyl nucleotide binding;adenyl ribonucleotide binding;ATP binding;binding;chaperone binding;macromolecule transmembrane transporter activity;nucleotide binding;P-P-bond-hydrolysis-driven protein transmembrane transporter activity;P-P-bond-hydrolysis-driven transmembrane transporter activity;primary active transmembrane transporter activity;protein bindi…	cell part;cytoplasmic part;intracellular membrane-bounded organelle;intracellular organelle;intracellular organelle lumen;intracellular organelle part;intracellular part;membrane;membrane-bounded organelle;membrane-enclosed lumen;mitochondrial inner membrane;mitochondrial matrix;mitochondrial membrane;mitochondrial part;mitochondrion;organelle;organelle inner membrane;organelle lumen;organelle me…		8	8	8	18.1	18.1	18.1	51.091	67.779	368370000	52	1	6	5	5	5	6	4	6	3	5	2	6	5	5	5	6	4	6	3	5	2	6	5	5	5	6	4	6	3	5	2	34368000
O54734	O54734	Dolichyl-diphosphooligosaccharide--protein glycosyltransferase 48 kDa subunit	Ddost	carbohydrate metabolic process;cell activation;cellular carbohydrate metabolic process;cellular macromolecule metabolic process;cellular metabolic process;cellular process;cellular protein metabolic process;glycosylation;immune system process;leukocyte activation;lymphocyte activation;macromolecule glycosylation;macromolecule metabolic process;macromolecule modification;metabolic process;peptidyl…	catalytic activity;dolichyl-diphosphooligosaccharide-protein glycotransferase activity;oligosaccharyl transferase activity;transferase activity;transferase activity, transferring glycosyl groups;transferase activity, transferring hexosyl groups	cell part;cytoplasmic part;endoplasmic reticulum;endoplasmic reticulum part;integral to membrane;intracellular membrane-bounded organelle;intracellular organelle;intracellular organelle part;intracellular part;intrinsic to membrane;macromolecular complex;membrane;membrane part;membrane-bounded organelle;oligosaccharyltransferase complex;organelle;organelle part;protein complex	N-Glycan biosynthesis;Protein processing in endoplasmic reticulum;Various types of N-glycan biosynthesis	15	15	15	51.7	51.7	51.7	49.027	189.22	2839500000	725	1	11	12	12	11	9	12	10	11	10	10	11	12	12	11	9	12	10	11	10	10	11	12	12	11	9	12	10	11	10	10	279710000
Q3TXU8;O55022	Q3TXU8;O55022	Membrane-associated progesterone receptor component 1	Pgrmc1	axon guidance;chemotaxis;locomotion;response to chemical stimulus;response to external stimulus;response to stimulus;taxis	binding;cation binding;heme binding;ion binding;iron ion binding;lipid binding;metal ion binding;steroid binding;tetrapyrrole binding;transition metal ion binding	cell part;cytoplasmic part;endomembrane system;endoplasmic reticulum;endoplasmic reticulum membrane;endoplasmic reticulum part;extracellular membrane-bounded organelle;extracellular organelle;extracellular region part;extracellular vesicular exosome;integral to membrane;intracellular membrane-bounded organelle;intracellular non-membrane-bounded organelle;intracellular organelle;intracellular orga…		12	12	11	63.6	63.6	59	21.694	205.69	9696700000	1168	2	11	11	11	11	12	12	11	11	10	11	11	11	11	11	12	12	11	11	10	11	10	10	10	10	11	11	10	10	9	10	866490000
O55029	O55029	Coatomer subunit beta	Copb2	cellular process;establishment of localization;establishment of localization in cell;establishment of protein localization;Golgi vesicle transport;intracellular protein transport;intracellular transport;intra-Golgi vesicle-mediated transport;protein transport;transport;vesicle-mediated transport	structural molecule activity	cell part;COPI vesicle coat;cytoplasmic part;cytoplasmic vesicle part;cytosol;Golgi apparatus;Golgi apparatus part;intracellular membrane-bounded organelle;intracellular organelle;intracellular organelle part;intracellular part;macromolecular complex;membrane coat;membrane part;membrane-bounded organelle;organelle;organelle part;protein complex;vesicle coat		10	10	10	11.9	11.9	11.9	102.45	10.399	221530000	36	1	3	3	4	6	8	4	4	4	4	5	3	3	4	6	8	4	4	4	4	5	3	3	4	6	8	4	4	4	4	5	15108000
Q5SVF7;O55125;Q5SVG6	Q5SVF7;O55125	Protein NipSnap homolog 1	Nipsnap1	multicellular organismal process;neurological system process;sensory perception;sensory perception of pain;system process	binding;neurotransmitter binding	cell part;cytoplasmic part;intracellular membrane-bounded organelle;intracellular organelle;intracellular organelle part;intracellular part;membrane;membrane-bounded organelle;mitochondrial inner membrane;mitochondrial membrane;mitochondrial part;mitochondrion;organelle;organelle inner membrane;organelle membrane;organelle part;synapse part;synaptic membrane		15	15	15	63.4	63.4	63.4	33.363	323.31	6799100000	1309	3	11	11	13	11	13	12	9	12	13	12	11	11	13	11	13	12	9	12	13	12	11	11	13	11	13	12	9	12	13	12	541280000
Q6ZWX1;O55142	Q6ZWX1;O55142	60S ribosomal protein L35a	Rpl35a	biosynthetic process;cellular biosynthetic process;cellular component biogenesis;cellular component biogenesis at cellular level;cellular component organization or biogenesis;cellular component organization or biogenesis at cellular level;cellular macromolecule biosynthetic process;cellular macromolecule metabolic process;cellular metabolic process;cellular nitrogen compound metabolic process;cel…	structural constituent of ribosome;structural molecule activity	cell part;cytoplasmic part;cytosolic large ribosomal subunit;extracellular membrane-bounded organelle;extracellular organelle;extracellular region part;extracellular vesicular exosome;intracellular membrane-bounded organelle;intracellular organelle;intracellular organelle part;intracellular part;large ribosomal subunit;macromolecular complex;membrane;membrane-bounded organelle;membrane-bounded ve…	Ribosome	3	3	3	20.9	20.9	20.9	12.554	4.9538	1480100000	155	2	2	3	3	3	2	3	3	3	3	3	2	3	3	3	2	3	3	3	3	3	2	3	3	3	2	3	3	3	3	3	32070000
O55234	O55234	Proteasome subunit beta type-5	Psmb5	catabolic process;cellular catabolic process;cellular macromolecule catabolic process;cellular macromolecule metabolic process;cellular metabolic process;cellular process;macromolecule catabolic process;macromolecule metabolic process;metabolic process;modification-dependent macromolecule catabolic process;modification-dependent protein catabolic process;primary metabolic process;proteasomal prot…	catalytic activity;endopeptidase activity;hydrolase activity;peptidase activity;peptidase activity, acting on L-amino acid peptides;threonine-type endopeptidase activity;threonine-type peptidase activity	cell part;centrosome;cytoplasm;cytoplasmic part;cytoskeletal part;cytosol;extracellular membrane-bounded organelle;extracellular organelle;extracellular region part;extracellular vesicular exosome;intracellular membrane-bounded organelle;intracellular non-membrane-bounded organelle;intracellular organelle;intracellular organelle part;intracellular part;macromolecular complex;membrane-bounded orga…	Proteasome	4	4	4	18.2	18.2	18.2	28.532	29.264	73465000	23	1	3	1	1	2	1	1	2	1	1	3	3	1	1	2	1	1	2	1	1	3	3	1	1	2	1	1	2	1	1	3	8693800
O55242	O55242	Sigma non-opioid intracellular receptor 1	Sigmar1	anatomical structure development;biological regulation;developmental process;establishment of localization;lipid transport;nervous system development;organic substance transport;regulation of apoptosis;regulation of biological process;regulation of cell death;regulation of cellular process;regulation of neuron apoptosis;regulation of programmed cell death;system development;transport	binding;G-protein coupled receptor activity;molecular transducer activity;opioid receptor activity;peptide binding;peptide receptor activity;peptide receptor activity, G-protein coupled;receptor activity;signal transducer activity;signaling receptor activity;transmembrane signaling receptor activity	cell junction;cell part;cell projection part;cytoplasmic part;endoplasmic reticulum membrane;endoplasmic reticulum part;envelope;growth cone;integral to membrane;intracellular organelle part;intracellular part;intrinsic to membrane;lipid particle;membrane;membrane part;nuclear envelope;nuclear inner membrane;nuclear membrane;nuclear outer membrane;nuclear part;organelle envelope;organelle inner m…		2	2	2	11.7	11.7	11.7	25.25	28.368	380270000	47	1	2	2	2	2	2	2	2	1	2	2	2	2	2	2	2	2	2	1	2	2	2	2	2	2	2	2	2	1	2	2	39869000
Q3TS38;O70475;D3YXP9	Q3TS38;O70475	UDP-glucose 6-dehydrogenase	Ugdh	alcohol metabolic process;anatomical structure morphogenesis;biosynthetic process;carbohydrate biosynthetic process;carbohydrate metabolic process;carboxylic acid biosynthetic process;carboxylic acid metabolic process;cellular biosynthetic process;cellular carbohydrate metabolic process;cellular ketone metabolic process;cellular metabolic process;cellular process;developmental process;embryonic m…	binding;catalytic activity;coenzyme binding;cofactor binding;NAD binding;nucleotide binding;oxidoreductase activity;oxidoreductase activity, acting on CH-OH group of donors;oxidoreductase activity, acting on the CH-OH group of donors, NAD or NADP as acceptor;UDP-glucose 6-dehydrogenase activity	cell part;extracellular membrane-bounded organelle;extracellular organelle;extracellular region part;extracellular vesicular exosome;intracellular organelle part;intracellular part;membrane-bounded organelle;membrane-bounded vesicle;nuclear part;nucleoplasm;organelle;organelle part;vesicle	Amino sugar and nucleotide sugar metabolism;Ascorbate and aldarate metabolism;Pentose and glucuronate interconversions;Starch and sucrose metabolism	20	20	20	53.5	53.5	53.5	54.831	257.7	2107800000	388	3	10	12	10	10	15	10	9	19	12	18	10	12	10	10	15	10	9	19	12	18	10	12	10	10	15	10	9	19	12	18	112890000
O70503	O70503	Very-long-chain 3-oxoacyl-CoA reductase	Hsd17b12	biological regulation;biosynthetic process;carboxylic acid biosynthetic process;carboxylic acid metabolic process;cellular biosynthetic process;cellular component organization;cellular component organization at cellular level;cellular component organization or biogenesis;cellular component organization or biogenesis at cellular level;cellular hormone metabolic process;cellular ketone metabolic pr…	binding;carbohydrate binding;catalytic activity;collagen binding;estradiol 17-beta-dehydrogenase activity;fibronectin binding;glycosaminoglycan binding;heparin binding;oxidoreductase activity;oxidoreductase activity, acting on CH-OH group of donors;oxidoreductase activity, acting on the CH-OH group of donors, NAD or NADP as acceptor;pattern binding;polysaccharide binding;protein binding;steroid d…	cell part;cytoplasmic part;endoplasmic reticulum membrane;endoplasmic reticulum part;extracellular matrix;extracellular region part;integral to membrane;intracellular organelle part;intracellular part;intrinsic to membrane;membrane;membrane part;organelle membrane;organelle part;proteinaceous extracellular matrix	Biosynthesis of unsaturated fatty acids;Steroid hormone biosynthesis	13	13	13	50.3	50.3	50.3	34.741	37.657	1369600000	281	1	8	9	8	8	10	10	7	12	7	6	8	9	8	8	10	10	7	12	7	6	8	9	8	8	10	10	7	12	7	6	107880000
O70570	O70570	Polymeric immunoglobulin receptor;Secretory component	Pigr	anatomical structure homeostasis;biological regulation;cell surface receptor linked signaling pathway;cellular component organization;cellular component organization or biogenesis;cellular localization;cellular macromolecule localization;cellular membrane organization;cellular process;cellular protein localization;cellular response to stimulus;detection of chemical stimulus;detection of chemical …	binding;immunoglobulin binding;immunoglobulin receptor activity;molecular transducer activity;polymeric immunoglobulin binding;polymeric immunoglobulin receptor activity;protein binding;protein complex binding;receptor activity;signal transducer activity;signaling receptor activity;transmembrane signaling receptor activity	cell part;extracellular membrane-bounded organelle;extracellular organelle;extracellular region part;extracellular space;extracellular vesicular exosome;integral to membrane;intrinsic to membrane;macromolecular complex;membrane;membrane part;membrane-bounded organelle;membrane-bounded vesicle;organelle;plasma membrane;protein complex;receptor complex;vesicle	Intestinal immune network for IgA production	3	3	3	4.9	4.9	4.9	84.998	48.184	70915000	11	1	2	0	2	2	1	2	3	0	2	1	2	0	2	2	1	2	3	0	2	1	2	0	2	2	1	2	3	0	2	1	5224500
O88441	O88441	Metaxin-2	Mtx2	establishment of localization;establishment of localization in cell;establishment of protein localization;establishment of protein localization in mitochondrion;establishment of protein localization to organelle;intracellular protein transport;intracellular transport;mitochondrial transport;protein import;protein targeting;protein targeting to mitochondrion;protein transport;transport		cell part;cytoplasmic part;intracellular membrane-bounded organelle;intracellular organelle;intracellular organelle part;intracellular part;membrane;membrane-bounded organelle;mitochondrial membrane;mitochondrial outer membrane;mitochondrial part;mitochondrion;organelle;organelle membrane;organelle outer membrane;organelle part;outer membrane		5	5	5	28.5	28.5	28.5	29.758	107.61	504640000	128	1	3	5	4	4	5	3	5	5	4	4	3	5	4	4	5	3	5	5	4	4	3	5	4	4	5	3	5	5	4	4	29685000
O88451	O88451	Retinol dehydrogenase 7	Rdh7	biological regulation;cellular hormone metabolic process;cellular lipid metabolic process;cellular metabolic process;cellular process;diterpenoid metabolic process;fat-soluble vitamin metabolic process;hormone metabolic process;isoprenoid metabolic process;lipid metabolic process;metabolic process;primary metabolic process;regulation of biological quality;regulation of hormone levels;retinoid met…	catalytic activity;oxidoreductase activity;oxidoreductase activity, acting on CH-OH group of donors;oxidoreductase activity, acting on the CH-OH group of donors, NAD or NADP as acceptor;retinol dehydrogenase activity	cell part;cytoplasmic part;endoplasmic reticulum;intracellular membrane-bounded organelle;intracellular organelle;intracellular part;membrane-bounded organelle;organelle		18	18	9	57.3	57.3	31.6	35.66	323.31	12279000000	970	1	15	15	15	16	16	15	15	16	16	15	15	15	15	16	16	15	15	16	16	15	7	7	7	8	8	7	8	8	8	7	977910000
Q3U6J9;O88531;B1B0P8;B1B0P9	Q3U6J9;O88531	Palmitoyl-protein thioesterase 1	Ppt1	adult behavior;adult locomotory behavior;anatomical structure development;associative learning;behavior;biological regulation;brain development;catabolic process;cation homeostasis;cellular catabolic process;cellular cation homeostasis;cellular chemical homeostasis;cellular component organization;cellular component organization at cellular level;cellular component organization or biogenesis;cellu…	acyl-CoA thioesterase activity;catalytic activity;CoA hydrolase activity;hydrolase activity;hydrolase activity, acting on ester bonds;palmitoyl-(protein) hydrolase activity;palmitoyl-CoA hydrolase activity;thiolester hydrolase activity	axon;cell body;cell part;cell projection;clathrin-coated vesicle;coated vesicle;cytoplasmic membrane-bounded vesicle;cytoplasmic part;cytoplasmic vesicle;cytosol;dendrite;extracellular membrane-bounded organelle;extracellular organelle;extracellular region;extracellular region part;extracellular space;extracellular vesicular exosome;Golgi apparatus;intracellular membrane-bounded organelle;intrace…	Fatty acid elongation in mitochondria;Lysosome	6	6	6	23.2	23.2	23.2	34.49	13.094	451460000	112	4	5	4	4	4	5	4	5	2	3	4	5	4	4	4	5	4	5	2	3	4	5	4	4	4	5	4	5	2	3	4	62105000
O88569;A0A0N4SUM2	O88569	Heterogeneous nuclear ribonucleoproteins A2/B1	Hnrnpa2b1	biological regulation;cellular macromolecule metabolic process;cellular metabolic process;cellular nitrogen compound metabolic process;cellular process;establishment of localization;establishment of RNA localization;macromolecule metabolic process;metabolic process;mRNA metabolic process;mRNA processing;negative regulation of biological process;negative regulation of biosynthetic process;negative…	binding;DNA binding;nucleic acid binding;nucleotide binding;RNA binding;sequence-specific DNA binding;single-stranded DNA binding;single-stranded telomeric DNA binding;structure-specific DNA binding;telomeric DNA binding	catalytic step 2 spliceosome;cell part;cytoplasm;intracellular membrane-bounded organelle;intracellular organelle;intracellular organelle part;intracellular part;macromolecular complex;membrane;membrane-bounded organelle;nuclear part;nucleoplasm;nucleus;organelle;organelle part;ribonucleoprotein complex;spliceosomal complex		7	7	7	18.7	18.7	18.7	37.402	30.645	320930000	54	2	3	2	2	3	5	5	3	4	6	6	3	2	2	3	5	5	3	4	6	6	3	2	2	3	5	5	3	4	6	6	16833000
O88587;D3Z227	O88587	Catechol O-methyltransferase	Comt	alcohol catabolic process;alcohol metabolic process;amine catabolic process;amine metabolic process;behavior;benzene-containing compound metabolic process;biological regulation;catabolic process;catecholamine catabolic process;catecholamine metabolic process;catechol-containing compound catabolic process;catechol-containing compound metabolic process;cell communication;cellular amine metabolic pr…	binding;catalytic activity;catechol O-methyltransferase activity;cation binding;ion binding;magnesium ion binding;metal ion binding;methyltransferase activity;O-methyltransferase activity;S-adenosylmethionine-dependent methyltransferase activity;transferase activity;transferase activity, transferring one-carbon groups	axon;cell body;cell part;cell projection;cell projection part;cytoplasmic part;cytosol;dendritic spine;extracellular membrane-bounded organelle;extracellular organelle;extracellular region part;extracellular vesicular exosome;integral to membrane;intracellular membrane-bounded organelle;intracellular organelle;intracellular part;intrinsic to membrane;membrane;membrane part;membrane-bounded organe…	Betalain biosynthesis;Steroid hormone biosynthesis;Tyrosine metabolism	13	13	13	62.6	62.6	62.6	29.486	157.93	1382500000	450	2	11	8	11	11	11	7	8	8	10	11	11	8	11	11	11	7	8	8	10	11	11	8	11	11	11	7	8	8	10	11	173510000
O88668;K4DI63;J3QP41	O88668;K4DI63;J3QP41	Protein CREG1	Creg1	biological regulation;regulation of biological process;regulation of biosynthetic process;regulation of cellular biosynthetic process;regulation of cellular macromolecule biosynthetic process;regulation of cellular metabolic process;regulation of cellular process;regulation of gene expression;regulation of growth;regulation of macromolecule biosynthetic process;regulation of macromolecule metabol…	binding;catalytic activity;coenzyme binding;cofactor binding;FMN binding;nucleotide binding;oxidoreductase activity;protein binding;transcription factor binding	cell part;extracellular membrane-bounded organelle;extracellular organelle;extracellular region part;extracellular vesicular exosome;intracellular organelle part;intracellular part;macromolecular complex;membrane-bounded organelle;membrane-bounded vesicle;nuclear part;nucleoplasm part;organelle;organelle part;protein complex;transcription factor complex;vesicle		2	2	2	13.2	13.2	13.2	24.452	8.0741	249670000	96	3	2	2	2	2	2	2	2	2	2	2	2	2	2	2	2	2	2	2	2	2	2	2	2	2	2	2	2	2	2	2	21568000
O88833;A2A977;A2A8T1;F8WGU9;A2A8S9;Q91WU1;A2A8S8	O88833;A2A977;A2A8T1	Cytochrome P450 4A10	Cyp4a10;Cyp4a32	carboxylic acid metabolic process;cellular ketone metabolic process;cellular lipid metabolic process;cellular metabolic process;cellular process;fatty acid metabolic process;lipid metabolic process;metabolic process;monocarboxylic acid metabolic process;organic acid metabolic process;oxoacid metabolic process;primary metabolic process;small molecule metabolic process	alkane 1-monooxygenase activity;arachidonic acid epoxygenase activity;arachidonic acid monooxygenase activity;binding;catalytic activity;cation binding;heme binding;ion binding;iron ion binding;leukotriene-B4 20-monooxygenase activity;metal ion binding;monooxygenase activity;oxidoreductase activity;oxidoreductase activity, acting on paired donors, with incorporation or reduction of molecular oxyg…	apical plasma membrane;cell part;cytoplasm;cytoplasmic part;endoplasmic reticulum membrane;endoplasmic reticulum part;extracellular membrane-bounded organelle;extracellular organelle;extracellular region part;extracellular vesicular exosome;intracellular membrane-bounded organelle;intracellular organelle;intracellular organelle part;intracellular part;membrane;membrane part;membrane-bounded organ…	Arachidonic acid metabolism;Fatty acid metabolism;PPAR signaling pathway;Retinol metabolism;Vascular smooth muscle contraction	23	18	17	59.7	49.9	47.5	58.33	198.49	1860300000	507	7	15	21	19	20	9	17	12	19	21	17	13	16	15	16	7	14	10	16	17	15	12	15	14	15	6	13	9	15	16	14	164210000
O88844;A0A087WPT4;A0A087WRS9;D3YVY3;A0A087WRM4	O88844	Isocitrate dehydrogenase [NADP] cytoplasmic	Idh1	2-oxoglutarate metabolic process;acetyl-CoA catabolic process;acetyl-CoA metabolic process;amine metabolic process;anatomical structure development;biological regulation;carbohydrate metabolic process;carboxylic acid metabolic process;catabolic process;cellular aldehyde metabolic process;cellular amine metabolic process;cellular amino acid metabolic process;cellular carbohydrate metabolic process…	binding;catalytic activity;cation binding;coenzyme binding;cofactor binding;identical protein binding;ion binding;isocitrate dehydrogenase (NADP+) activity;isocitrate dehydrogenase activity;magnesium ion binding;metal ion binding;NAD binding;NADP binding;nucleotide binding;oxidoreductase activity;oxidoreductase activity, acting on CH-OH group of donors;oxidoreductase activity, acting on the CH-OH…	cell part;cytoplasm;cytoplasmic part;cytosol;extracellular membrane-bounded organelle;extracellular organelle;extracellular region part;extracellular vesicular exosome;intracellular membrane-bounded organelle;intracellular organelle;intracellular part;membrane-bounded organelle;membrane-bounded vesicle;microbody;mitochondrion;organelle;peroxisome;vesicle	Carbon fixation pathways in prokaryotes;Citrate cycle (TCA cycle);Glutathione metabolism;Peroxisome	22	22	21	53.6	53.6	51.4	46.674	323.31	6724500000	1192	5	16	19	19	18	19	17	17	20	19	18	16	19	19	18	19	17	17	20	19	18	15	18	18	17	18	16	16	19	18	17	483210000
O88986;E9PWY6	O88986;E9PWY6	2-amino-3-ketobutyrate coenzyme A ligase, mitochondrial	Gcat	amine catabolic process;amine metabolic process;aspartate family amino acid catabolic process;aspartate family amino acid metabolic process;biosynthetic process;carboxylic acid catabolic process;carboxylic acid metabolic process;catabolic process;cellular amine metabolic process;cellular amino acid catabolic process;cellular amino acid metabolic process;cellular catabolic process;cellular ketone …	acetyltransferase activity;binding;C-acetyltransferase activity;C-acyltransferase activity;catalytic activity;cofactor binding;glycine C-acetyltransferase activity;pyridoxal phosphate binding;transferase activity;transferase activity, transferring acyl groups;transferase activity, transferring acyl groups other than amino-acyl groups;vitamin B6 binding;vitamin binding	cell part;cytoplasmic part;intracellular membrane-bounded organelle;intracellular organelle;intracellular organelle part;intracellular part;membrane-bounded organelle;mitochondrion;nuclear part;nucleoplasm;organelle;organelle part	Glycine, serine and threonine metabolism	7	7	7	25.2	25.2	25.2	44.93	13.441	184590000	44	2	3	1	1	0	3	1	1	5	5	5	3	1	1	0	3	1	1	5	5	5	3	1	1	0	3	1	1	5	5	5	35128000
O89023	O89023	Tripeptidyl-peptidase 1	Tpp1	anatomical structure development;anatomical structure homeostasis;biological regulation;bone resorption;catabolic process;cell differentiation;cellular catabolic process;cellular component organization;cellular component organization at cellular level;cellular component organization or biogenesis;cellular component organization or biogenesis at cellular level;cellular developmental process;cellul…	binding;catalytic activity;cation binding;endopeptidase activity;exopeptidase activity;hydrolase activity;ion binding;metal ion binding;peptidase activity;peptidase activity, acting on L-amino acid peptides;serine hydrolase activity;serine-type endopeptidase activity;serine-type peptidase activity;tripeptidyl-peptidase activity	cell part;cytoplasmic membrane-bounded vesicle;cytoplasmic part;cytoplasmic vesicle;extracellular membrane-bounded organelle;extracellular organelle;extracellular region part;extracellular vesicular exosome;intracellular membrane-bounded organelle;intracellular organelle;intracellular part;lysosome;lytic vacuole;melanosome;membrane-bounded organelle;membrane-bounded vesicle;mitochondrion;organell…	Lysosome	5	5	5	16.5	16.5	16.5	61.341	136.86	2172000000	372	1	5	5	5	5	5	5	5	3	4	4	5	5	5	5	5	5	5	3	4	4	5	5	5	5	5	5	5	3	4	4	249720000
Q3UKA4;P00329	Q3UKA4;P00329	Alcohol dehydrogenase 1	Adh1	adult behavior;alcohol catabolic process;alcohol metabolic process;behavior;behavioral response to ethanol;biological regulation;carboxylic acid metabolic process;catabolic process;cellular hormone metabolic process;cellular ketone metabolic process;cellular lipid metabolic process;cellular metabolic process;cellular process;diterpenoid metabolic process;ethanol catabolic process;ethanol metaboli…	alcohol dehydrogenase (NAD) activity;binding;catalytic activity;cation binding;identical protein binding;ion binding;metal ion binding;oxidoreductase activity;oxidoreductase activity, acting on CH-OH group of donors;oxidoreductase activity, acting on the CH-OH group of donors, NAD or NADP as acceptor;protein binding;protein dimerization activity;protein homodimerization activity;transition metal …	cell part;cytoplasmic part;intracellular;intracellular membrane-bounded organelle;intracellular organelle;intracellular part;membrane-bounded organelle;mitochondrion;organelle	Drug metabolism - cytochrome P450;Fatty acid metabolism;Glycolysis / Gluconeogenesis;Metabolism of xenobiotics by cytochrome P450;Retinol metabolism;Tyrosine metabolism	19	19	19	68.8	68.8	68.8	39.771	323.31	45123000000	3796	2	15	15	16	16	19	16	14	18	14	16	15	15	16	16	19	16	14	18	14	16	15	15	16	16	19	16	14	18	14	16	5408900000
Q7JCZ1;P00405	Q7JCZ1;P00405	Cytochrome c oxidase subunit 2	mt-Co2;Mtco2	cellular metabolic process;cellular process;electron transport chain;generation of precursor metabolites and energy;metabolic process;oxidation-reduction process	binding;catalytic activity;cation binding;cation transmembrane transporter activity;copper ion binding;cytochrome-c oxidase activity;heme-copper terminal oxidase activity;hydrogen ion transmembrane transporter activity;inorganic cation transmembrane transporter activity;ion binding;ion transmembrane transporter activity;metal ion binding;monovalent inorganic cation transmembrane transporter activ…	cell part;cytoplasmic part;extracellular membrane-bounded organelle;extracellular organelle;extracellular region part;extracellular vesicular exosome;integral to membrane;intracellular membrane-bounded organelle;intracellular organelle;intracellular organelle part;intracellular part;intrinsic to membrane;macromolecular complex;membrane;membrane part;membrane-bounded organelle;membrane-bounded ves…	Alzheimer's disease;Cardiac muscle contraction;Huntington's disease;Oxidative phosphorylation;Parkinson's disease	7	7	7	44.9	44.9	44.9	25.976	247.89	17572000000	1509	2	7	7	6	7	6	7	7	7	7	7	7	7	6	7	6	7	7	7	7	7	7	7	6	7	6	7	7	7	7	7	1847500000
P00493	P00493	Hypoxanthine-guanine phosphoribosyltransferase	Hprt1	adenine biosynthetic process;adenine metabolic process;adenine salvage;alcohol metabolic process;amine metabolic process;anatomical structure development;anatomical structure morphogenesis;behavior;benzene-containing compound metabolic process;biological regulation;biosynthetic process;catabolic process;catecholamine metabolic process;catechol-containing compound metabolic process;cell activation…	binding;catalytic activity;cation binding;guanine phosphoribosyltransferase activity;hypoxanthine phosphoribosyltransferase activity;identical protein binding;ion binding;magnesium ion binding;metal ion binding;nucleotide binding;protein binding;protein dimerization activity;protein homodimerization activity;transferase activity;transferase activity, transferring glycosyl groups;transferase activ…	cell part;cytoplasm;cytoplasmic part;cytosol;extracellular membrane-bounded organelle;extracellular organelle;extracellular region part;extracellular vesicular exosome;intracellular part;membrane-bounded organelle;membrane-bounded vesicle;organelle;vesicle	Drug metabolism - other enzymes;Purine metabolism	5	5	5	26.1	26.1	26.1	24.57	6.6249	87247000	26	1	3	1	2	3	2	0	2	4	4	4	3	1	2	3	2	0	2	4	4	4	3	1	2	3	2	0	2	4	4	4	8496900
P00920;A0A0A6YX78	P00920	Carbonic anhydrase 2	Ca2	anatomical structure development;anatomical structure morphogenesis;biological regulation;carbon dioxide transport;cation homeostasis;cellular cation homeostasis;cellular chemical homeostasis;cellular homeostasis;cellular ion homeostasis;cellular metabolic process;cellular monovalent inorganic cation homeostasis;cellular process;cellular response to fluid shear stress;cellular response to stimulu…	arylesterase activity;binding;carbonate dehydratase activity;carbon-oxygen lyase activity;carboxylic ester hydrolase activity;catalytic activity;cation binding;hydrolase activity;hydrolase activity, acting on ester bonds;hydro-lyase activity;ion binding;lyase activity;metal ion binding;transition metal ion binding;zinc ion binding	apical part of cell;axon;basolateral plasma membrane;cell part;cell projection;cytoplasm;cytoplasmic part;cytosol;extracellular membrane-bounded organelle;extracellular organelle;extracellular region part;extracellular space;extracellular vesicular exosome;intracellular part;membrane;membrane part;membrane-bounded organelle;membrane-bounded vesicle;microvillus;myelin sheath;neuron projection;orga…	Nitrogen metabolism	7	7	7	30.8	30.8	30.8	29.032	22.848	302030000	55	2	2	2	1	3	2	2	2	5	7	3	2	2	1	3	2	2	2	5	7	3	2	2	1	3	2	2	2	5	7	3	12675000
P01027;CON__Q2UVX4;H3BKW9;H3BL60	P01027	Complement C3;Complement C3 beta chain;C3-beta-c;Complement C3 alpha chain;C3a anaphylatoxin;Acylation stimulating protein;Complement C3b alpha chain;Complement C3c alpha chain fragment 1;Complement C3dg fragment;Complement C3g fragment;Complement C3d fragment;Complement C3f fragment;Complement C3c alpha chain fragment 2	C3	activation of immune response;biological regulation;carboxylic acid metabolic process;cellular ketone metabolic process;cellular lipid metabolic process;cellular metabolic process;cellular process;complement activation;complement activation, alternative pathway;complement activation, classical pathway;defense response;fatty acid metabolic process;humoral immune response;immune effector process;im…	binding;C5a anaphylatoxin chemotactic receptor binding;C5L2 anaphylatoxin chemotactic receptor binding;endopeptidase inhibitor activity;endopeptidase regulator activity;enzyme inhibitor activity;enzyme regulator activity;G-protein-coupled receptor binding;peptidase inhibitor activity;peptidase regulator activity;protein binding;receptor binding	blood microparticle;extracellular membrane-bounded organelle;extracellular organelle;extracellular region part;extracellular space;extracellular vesicular exosome;membrane-bounded organelle;membrane-bounded vesicle;organelle;vesicle	Chagas disease (American trypanosomiasis);Complement and coagulation cascades;ko05152;Leishmaniasis;Phagosome;Staphylococcus aureus infection;Systemic lupus erythematosus	58	58	58	40.8	40.8	40.8	186.48	323.31	6282200000	998	4	33	28	24	31	37	41	33	42	52	44	33	28	24	31	37	41	33	42	52	44	33	28	24	31	37	41	33	42	52	44	456880000
P01029;CON__P01030;CON__ENSEMBL:ENSBTAP00000007350	P01029	Complement C4-B;Complement C4 beta chain;Complement C4 alpha chain;C4a anaphylatoxin;Complement C4 gamma chain	C4b	activation of immune response;biological regulation;complement activation;complement activation, classical pathway;defense response;humoral immune response;immune effector process;immune response;immune system process;inflammatory response;innate immune response;macromolecule metabolic process;metabolic process;positive regulation of biological process;positive regulation of immune response;posit…	endopeptidase inhibitor activity;endopeptidase regulator activity;enzyme inhibitor activity;enzyme regulator activity;peptidase inhibitor activity;peptidase regulator activity	extracellular region part;extracellular space	Complement and coagulation cascades;Staphylococcus aureus infection;Systemic lupus erythematosus	7	7	7	5.6	5.6	5.6	192.91	15.909	114350000	15	3	5	1	1	1	5	6	3	1	4	1	5	1	1	1	5	6	3	1	4	1	5	1	1	1	5	6	3	1	4	1	18635000
P01898;E9PX63;O19441	P01898	H-2 class I histocompatibility antigen, Q10 alpha chain	H2-Q10	antigen processing and presentation;antigen processing and presentation of peptide antigen;antigen processing and presentation of peptide antigen via MHC class I;biological regulation;immune response;immune system process;positive regulation of adaptive immune response;positive regulation of adaptive immune response based on somatic recombination of immune receptors built from immunoglobulin supe…	antigen binding;beta-2-microglobulin binding;binding;peptide antigen binding;peptide binding;protein binding;protein complex binding;receptor binding;T cell receptor binding;TAP binding	cell part;cell surface;cytoplasmic part;cytoplasmic vesicle membrane;cytoplasmic vesicle part;endocytic vesicle membrane;endoplasmic reticulum;endoplasmic reticulum exit site;endoplasmic reticulum part;extracellular membrane-bounded organelle;extracellular organelle;extracellular region part;extracellular vesicular exosome;Golgi apparatus;Golgi apparatus part;Golgi cisterna;Golgi medial cisterna;…	Allograft rejection;Antigen processing and presentation;Autoimmune thyroid disease;Cell adhesion molecules (CAMs);Endocytosis;Graft-versus-host disease;Natural killer cell mediated cytotoxicity;Phagosome;Type I diabetes mellitus;Viral myocarditis	9	7	6	30.8	24.6	20.3	37.251	15.872	234880000	72	3	4	5	6	6	6	3	5	5	7	5	4	5	4	4	4	3	4	3	5	3	4	4	3	4	4	3	4	3	4	2	26398000
Q792Z7;P01899;P01897;Q8HWB2;A7VMS6;E9Q0G4;G3UXE9;P01896;P01895;G3UZL7;Q05A75	Q792Z7;P01899;P01897	H-2 class I histocompatibility antigen, D-B alpha chain;H-2 class I histocompatibility antigen, L-D alpha chain	H2-D1;H2-L	antigen processing and presentation;antigen processing and presentation of endogenous antigen;antigen processing and presentation of endogenous peptide antigen;antigen processing and presentation of endogenous peptide antigen via MHC class I;antigen processing and presentation of endogenous peptide antigen via MHC class I via ER pathway;antigen processing and presentation of endogenous peptide an…	antigen binding;beta-2-microglobulin binding;binding;peptide antigen binding;peptide binding;protein binding;protein complex binding;receptor binding;T cell receptor binding;TAP binding	cell part;cell surface;cytoplasmic part;cytoplasmic vesicle membrane;cytoplasmic vesicle part;endocytic vesicle membrane;endoplasmic reticulum;endoplasmic reticulum exit site;endoplasmic reticulum part;external side of plasma membrane;extracellular membrane-bounded organelle;extracellular organelle;extracellular region part;extracellular vesicular exosome;Golgi apparatus;Golgi apparatus part;Golg…	Allograft rejection;Antigen processing and presentation;Autoimmune thyroid disease;Cell adhesion molecules (CAMs);Endocytosis;Graft-versus-host disease;Natural killer cell mediated cytotoxicity;Phagosome;Type I diabetes mellitus;Viral myocarditis	12	12	7	33.7	33.7	19.3	40.836	69.062	576640000	129	11	8	7	10	10	12	8	10	8	8	6	8	7	10	10	12	8	10	8	8	6	6	4	6	6	7	6	6	4	4	2	38559000
Q3TH01;Q7JJ15;P01901;G3UXW2;P04223;P14428;P03991;A0A0B4J1G3	Q3TH01;Q7JJ15;P01901;G3UXW2	H-2 class I histocompatibility antigen, K-B alpha chain	H2-K1	anatomical structure development;antigen processing and presentation;antigen processing and presentation of endogenous antigen;antigen processing and presentation of endogenous peptide antigen;antigen processing and presentation of endogenous peptide antigen via MHC class I;antigen processing and presentation of endogenous peptide antigen via MHC class I via ER pathway;antigen processing and pres…	antigen binding;beta-2-microglobulin binding;binding;peptide antigen binding;peptide binding;protein binding;protein complex binding;receptor binding;T cell receptor binding;TAP binding	cell part;cell surface;cytoplasmic part;cytoplasmic vesicle membrane;cytoplasmic vesicle part;endocytic vesicle membrane;endoplasmic reticulum;endoplasmic reticulum exit site;endoplasmic reticulum part;external side of plasma membrane;extracellular membrane-bounded organelle;extracellular organelle;extracellular region part;extracellular vesicular exosome;Golgi apparatus;Golgi apparatus part;Golg…	Allograft rejection;Antigen processing and presentation;Autoimmune thyroid disease;Cell adhesion molecules (CAMs);Endocytosis;Graft-versus-host disease;Natural killer cell mediated cytotoxicity;Phagosome;Type I diabetes mellitus;Viral myocarditis	12	10	5	37.5	32.2	17.8	40.285	82.515	233710000	70	8	6	6	9	8	10	7	7	8	9	7	5	5	7	6	8	6	5	6	7	5	2	1	3	2	4	3	2	2	2	1	14929000
P03888	P03888	NADH-ubiquinone oxidoreductase chain 1	Mtnd1		catalytic activity;NADH dehydrogenase (quinone) activity;NADH dehydrogenase (ubiquinone) activity;NADH dehydrogenase activity;oxidoreductase activity;oxidoreductase activity, acting on NADH or NADPH;oxidoreductase activity, acting on NADH or NADPH, quinone or similar compound as acceptor	cell part;cytoplasmic part;integral to membrane;intracellular membrane-bounded organelle;intracellular organelle;intracellular organelle part;intracellular part;intrinsic to membrane;macromolecular complex;membrane part;membrane-bounded organelle;mitochondrial membrane part;mitochondrial part;mitochondrial respiratory chain complex I;mitochondrion;NADH dehydrogenase complex;organelle;organelle pa…	Oxidative phosphorylation;Parkinson's disease	4	4	4	14.5	14.5	14.5	36.059	23.048	228900000	97	1	3	3	3	2	4	3	3	3	3	2	3	3	3	2	4	3	3	3	3	2	3	3	3	2	4	3	3	3	3	2	28264000
Q7JCY6;P03911	Q7JCY6;P03911	NADH-ubiquinone oxidoreductase chain 4	mt-Nd4;Mtnd4	cellular metabolic process;cellular process;electron transport chain;generation of precursor metabolites and energy;metabolic process;mitochondrial electron transport, NADH to ubiquinone;oxidation-reduction process;respiratory electron transport chain	catalytic activity;NADH dehydrogenase (quinone) activity;NADH dehydrogenase (ubiquinone) activity;NADH dehydrogenase activity;oxidoreductase activity;oxidoreductase activity, acting on NADH or NADPH;oxidoreductase activity, acting on NADH or NADPH, quinone or similar compound as acceptor	cell part;cytoplasmic part;integral to membrane;intracellular membrane-bounded organelle;intracellular organelle;intracellular organelle part;intracellular part;intrinsic to membrane;macromolecular complex;membrane part;membrane-bounded organelle;mitochondrial membrane part;mitochondrial part;mitochondrial respiratory chain complex I;mitochondrion;NADH dehydrogenase complex;organelle;organelle pa…	Oxidative phosphorylation;Parkinson's disease	7	7	7	20.9	20.9	20.9	51.881	68.666	769220000	211	2	5	6	4	5	5	6	6	5	6	3	5	6	4	5	5	6	6	5	6	3	5	6	4	5	5	6	6	5	6	3	64647000
Q9MD82;P03921	Q9MD82;P03921	NADH-ubiquinone oxidoreductase chain 5	mt-Nd5;Mtnd5	ATP synthesis coupled electron transport;cellular metabolic process;cellular process;electron transport chain;generation of precursor metabolites and energy;metabolic process;oxidation-reduction process;respiratory electron transport chain	catalytic activity;NADH dehydrogenase (quinone) activity;NADH dehydrogenase (ubiquinone) activity;NADH dehydrogenase activity;oxidoreductase activity;oxidoreductase activity, acting on NADH or NADPH;oxidoreductase activity, acting on NADH or NADPH, quinone or similar compound as acceptor	cell part;cytoplasmic part;integral to membrane;intracellular membrane-bounded organelle;intracellular organelle;intracellular organelle part;intracellular part;intrinsic to membrane;membrane;membrane part;membrane-bounded organelle;mitochondrial inner membrane;mitochondrial membrane;mitochondrial part;mitochondrion;organelle;organelle inner membrane;organelle membrane;organelle part;respiratory …	Oxidative phosphorylation;Parkinson's disease	4	4	4	10.4	10.4	10.4	68.474	72.354	412750000	187	2	3	3	3	2	4	3	2	3	3	3	3	3	3	2	4	3	2	3	3	3	3	3	3	2	4	3	2	3	3	3	26382000
P04919	P04919	Band 3 anion transport protein	Slc4a1	anion transport;bicarbonate transport;biological regulation;cation homeostasis;cellular cation homeostasis;cellular chemical homeostasis;cellular homeostasis;cellular ion homeostasis;cellular monovalent inorganic cation homeostasis;cellular process;chemical homeostasis;chloride transport;establishment of localization;homeostatic process;inorganic anion transport;ion homeostasis;ion transport;mono…	active transmembrane transporter activity;anion transmembrane transporter activity;anion:anion antiporter activity;ankyrin binding;antiporter activity;bicarbonate transmembrane transporter activity;binding;chloride transmembrane transporter activity;cytoskeletal protein binding;identical protein binding;inorganic anion exchanger activity;inorganic anion transmembrane transporter activity;ion tran…	basolateral plasma membrane;blood microparticle;cell cortex part;cell part;contractile fiber part;cortical cytoskeleton;cytoplasmic part;cytoskeleton;extracellular membrane-bounded organelle;extracellular organelle;extracellular region part;extracellular vesicular exosome;integral to membrane;integral to plasma membrane;intracellular non-membrane-bounded organelle;intracellular organelle;intracel…	Collecting duct acid secretion	16	16	16	23.5	23.5	23.5	103.13	212.98	623550000	146	1	6	5	5	3	7	11	6	6	15	5	6	5	5	3	7	11	6	6	15	5	6	5	5	3	7	11	6	6	15	5	24997000
P05201;F7ALS6	P05201	Aspartate aminotransferase, cytoplasmic	Got1	2-oxoglutarate metabolic process;alcohol biosynthetic process;alcohol metabolic process;alditol biosynthetic process;alditol metabolic process;amine biosynthetic process;amine catabolic process;amine metabolic process;aspartate biosynthetic process;aspartate catabolic process;aspartate family amino acid biosynthetic process;aspartate family amino acid catabolic process;aspartate family amino acid…	binding;carbon-carbon lyase activity;carboxylic acid binding;carboxy-lyase activity;catalytic activity;cofactor binding;L-aspartate:2-oxoglutarate aminotransferase activity;L-cysteine:2-oxoglutarate aminotransferase activity;L-phenylalanine aminotransferase activity;L-phenylalanine:2-oxoglutarate aminotransferase activity;lyase activity;phosphatidylserine decarboxylase activity;pyridoxal phosphat…	axon part;axon terminus;cell part;cell projection part;cytoplasm;cytoplasmic part;cytosol;extracellular membrane-bounded organelle;extracellular organelle;extracellular region part;extracellular vesicular exosome;intracellular membrane-bounded organelle;intracellular organelle;intracellular part;lysosome;lytic vacuole;membrane-bounded organelle;membrane-bounded vesicle;neuron projection terminus;…	Alanine, aspartate and glutamate metabolism;Arginine and proline metabolism;Cysteine and methionine metabolism;Phenylalanine metabolism;Phenylalanine, tyrosine and tryptophan biosynthesis;Tyrosine metabolism	23	23	23	65.1	65.1	65.1	46.247	323.31	5266000000	1013	2	16	16	12	14	17	14	15	21	20	23	16	16	12	14	17	14	15	21	20	23	16	16	12	14	17	14	15	21	20	23	259960000
P05202	P05202	Aspartate aminotransferase, mitochondrial	Got2	2-oxoglutarate metabolic process;amine biosynthetic process;amine catabolic process;amine metabolic process;aspartate biosynthetic process;aspartate catabolic process;aspartate family amino acid biosynthetic process;aspartate family amino acid catabolic process;aspartate family amino acid metabolic process;aspartate metabolic process;biosynthetic process;carboxylic acid biosynthetic process;carbo…	binding;catalytic activity;cofactor binding;kynurenine-oxoglutarate transaminase activity;L-aspartate:2-oxoglutarate aminotransferase activity;L-phenylalanine aminotransferase activity;L-phenylalanine:2-oxoglutarate aminotransferase activity;pyridoxal phosphate binding;transaminase activity;transferase activity;transferase activity, transferring nitrogenous groups;vitamin B6 binding;vitamin bindi…	cell part;cytoplasmic part;extracellular membrane-bounded organelle;extracellular organelle;extracellular region part;extracellular vesicular exosome;intracellular membrane-bounded organelle;intracellular organelle;intracellular organelle lumen;intracellular organelle part;intracellular part;membrane;membrane-bounded organelle;membrane-bounded vesicle;membrane-enclosed lumen;mitochondrial inner m…	Alanine, aspartate and glutamate metabolism;Arginine and proline metabolism;Cysteine and methionine metabolism;Fat digestion and absorption;Phenylalanine metabolism;Phenylalanine, tyrosine and tryptophan biosynthesis;Tyrosine metabolism	26	26	26	70.7	70.7	70.7	47.411	323.31	13078000000	1519	1	16	17	18	19	20	19	17	26	24	25	16	17	18	19	20	19	17	26	24	25	16	17	18	19	20	19	17	26	24	25	566360000
P06728	P06728	Apolipoprotein A-IV	Apoa4	alcohol metabolic process;amine metabolic process;anatomical structure morphogenesis;biological adhesion;biological regulation;biosynthetic process;catabolic process;cell adhesion;cell part morphogenesis;cell projection morphogenesis;cell projection organization;cell-cell adhesion;cellular amine metabolic process;cellular biogenic amine metabolic process;cellular catabolic process;cellular compon…	alcohol binding;amine binding;antioxidant activity;binding;cation binding;cholesterol binding;cholesterol transporter activity;copper ion binding;enzyme activator activity;enzyme regulator activity;identical protein binding;ion binding;lipid binding;lipid transporter activity;metal ion binding;phosphatidylcholine binding;phosphatidylcholine-sterol O-acyltransferase activator activity;phospholipid…	blood microparticle;cell part;cell surface;chylomicron;cytoplasmic part;cytosol;extracellular membrane-bounded organelle;extracellular organelle;extracellular region;extracellular region part;extracellular space;extracellular vesicular exosome;high-density lipoprotein particle;intracellular part;macromolecular complex;membrane-bounded organelle;membrane-bounded vesicle;organelle;plasma lipoprotei…	Fat digestion and absorption;Vitamin digestion and absorption	9	9	9	25.1	25.1	25.1	45.029	47.727	355780000	42	1	3	5	5	4	5	4	5	3	9	5	3	5	5	4	5	4	5	3	9	5	3	5	5	4	5	4	5	3	9	5	23135000
P06745;CON__Q3ZBD7;A0A0U1RQ72;A0A0U1RP97;A0A0U1RQ18	P06745	Glucose-6-phosphate isomerase	Gpi	alcohol biosynthetic process;alcohol catabolic process;alcohol metabolic process;anatomical structure formation involved in morphogenesis;angiogenesis;biological regulation;biosynthetic process;carbohydrate biosynthetic process;carbohydrate catabolic process;carbohydrate homeostasis;carbohydrate metabolic process;catabolic process;cellular biosynthetic process;cellular carbohydrate biosynthetic p…	catalytic activity;glucose-6-phosphate isomerase activity;intramolecular oxidoreductase activity;intramolecular oxidoreductase activity, interconverting aldoses and ketoses;isomerase activity	cell part;cell projection membrane;cell projection part;cilium membrane;cilium part;cytoplasm;extracellular membrane-bounded organelle;extracellular organelle;extracellular region part;extracellular space;extracellular vesicular exosome;intracellular organelle part;intracellular part;membrane;membrane part;membrane-bounded organelle;membrane-bounded vesicle;myelin sheath;nuclear part;nucleoplasm;…	Amino sugar and nucleotide sugar metabolism;Glycolysis / Gluconeogenesis;Pentose phosphate pathway;Starch and sucrose metabolism	13	13	13	30.1	30.1	30.1	62.766	107.01	720150000	207	5	6	7	4	5	9	6	9	13	9	11	6	7	4	5	9	6	9	13	9	11	6	7	4	5	9	6	9	13	9	11	44038000
P06801;Q3TQP6	P06801;Q3TQP6	NADP-dependent malic enzyme;Malic enzyme	Me1	carboxylic acid metabolic process;cellular component assembly;cellular component organization;cellular component organization or biogenesis;cellular ketone metabolic process;cellular metabolic process;cellular process;dicarboxylic acid metabolic process;macromolecular complex assembly;macromolecular complex subunit organization;malate metabolic process;metabolic process;organic acid metabolic pro…	binding;carbon-carbon lyase activity;carboxy-lyase activity;catalytic activity;cation binding;coenzyme binding;cofactor binding;ion binding;lyase activity;malate dehydrogenase (decarboxylating) activity;malate dehydrogenase (oxaloacetate-decarboxylating) (NADP+) activity;malate dehydrogenase activity;malic enzyme activity;manganese ion binding;metal ion binding;NAD binding;nucleotide binding;oxal…	cell part;cytoplasmic part;cytosol;intracellular membrane-bounded organelle;intracellular organelle;intracellular part;membrane-bounded organelle;mitochondrion;organelle	Carbon fixation in photosynthetic organisms;Pyruvate metabolism	25	25	25	56.1	56.1	56.1	63.953	139.9	2782700000	487	2	15	17	17	17	16	13	18	19	15	18	15	17	17	17	16	13	18	19	15	18	15	17	17	17	16	13	18	19	15	18	288670000
Q5M9K1;P07309	Q5M9K1;P07309	Transthyretin	Ttr	amine transport;amino acid transport;biological regulation;carboxylic acid transport;cellular hormone metabolic process;cellular lipid metabolic process;cellular metabolic process;cellular process;diterpenoid metabolic process;establishment of localization;fat-soluble vitamin metabolic process;hormone metabolic process;hormone transport;isoprenoid metabolic process;lipid metabolic process;metabol…	binding;hormone binding;identical protein binding;protein binding;thyroid hormone binding	extracellular membrane-bounded organelle;extracellular organelle;extracellular region part;extracellular space;extracellular vesicular exosome;macromolecular complex;membrane-bounded organelle;membrane-bounded vesicle;organelle;protein complex;vesicle		5	5	5	46.3	46.3	46.3	15.776	36.89	1433600000	234	2	5	5	4	5	5	3	5	5	5	5	5	5	4	5	5	3	5	5	5	5	5	5	4	5	5	3	5	5	5	5	113410000
Q542G9;P07356;B0V2N7;B0V2N8;B0V2N5	Q542G9;P07356;B0V2N7;B0V2N8;B0V2N5	Annexin;Annexin A2	Anxa2	anatomical structure formation involved in morphogenesis;angiogenesis;biological regulation;body fluid secretion;cellular component assembly;cellular component assembly at cellular level;cellular component organization;cellular component organization at cellular level;cellular component organization or biogenesis;cellular component organization or biogenesis at cellular level;cellular membrane or…	binding;calcium ion binding;calcium-dependent phospholipid binding;calcium-dependent protein binding;cation binding;enzyme inhibitor activity;enzyme regulator activity;ion binding;lipase inhibitor activity;lipid binding;metal ion binding;phosphatidylinositol binding;phosphatidylinositol-4,5-bisphosphate binding;phospholipase A2 inhibitor activity;phospholipase inhibitor activity;phospholipid bind…	basement membrane;basolateral plasma membrane;cell cortex;cell part;cell projection;cell surface;cytoplasm;cytoplasmic membrane-bounded vesicle;cytoplasmic part;cytoplasmic vesicle;cytosol;early endosome;endosomal part;endosome;endosome membrane;extracellular matrix part;extracellular membrane-bounded organelle;extracellular organelle;extracellular region part;extracellular space;extracellular ve…		13	13	13	45.1	45.1	45.1	38.676	110.58	1013900000	252	5	12	11	13	12	12	12	11	7	8	11	12	11	13	12	12	12	11	7	8	11	12	11	13	12	12	12	11	7	8	11	87250000
Q546G4;P07724	Q546G4;P07724	Serum albumin	Alb	anatomical structure homeostasis;behavior;biological regulation;cell communication;cell killing;cellular process;cellular response to external stimulus;cellular response to extracellular stimulus;cellular response to nutrient levels;cellular response to starvation;cellular response to stimulus;cellular response to stress;circadian behavior;circadian rhythm;circadian sleep/wake cycle process;cytol…	binding;carboxylic acid binding;cation binding;chaperone binding;cofactor binding;DNA binding;drug binding;fatty acid binding;ion binding;lipid binding;metal ion binding;monocarboxylic acid binding;nucleic acid binding;oxygen binding;protein binding;pyridoxal phosphate binding;toxin binding;transition metal ion binding;vitamin B6 binding;vitamin binding;zinc ion binding	basement membrane;blood microparticle;cell part;cytoplasm;extracellular matrix part;extracellular membrane-bounded organelle;extracellular organelle;extracellular region;extracellular region part;extracellular space;extracellular vesicular exosome;intracellular membrane-bounded organelle;intracellular organelle;intracellular part;macromolecular complex;membrane-bounded organelle;membrane-bounded …		42	42	39	73	73	70.2	68.692	323.31	40855000000	4594	2	29	30	31	35	34	32	31	35	40	35	29	30	31	35	34	32	31	35	40	35	26	27	29	32	31	29	28	32	37	32	1838400000
Q80Y52;P07901;B7ZC50;A2A6A2;B7ZC49	Q80Y52;P07901	Heat shock protein HSP 90-alpha	Hsp90aa1	apoptosis;biological regulation;biosynthetic process;cardiac muscle cell apoptosis;cell death;cell migration;cell motility;cellular biosynthetic process;cellular component assembly;cellular component assembly at cellular level;cellular component movement;cellular component organization;cellular component organization at cellular level;cellular component organization or biogenesis;cellular compone…	adenyl deoxyribonucleotide binding;adenyl nucleotide binding;adenyl ribonucleotide binding;antigen binding;ATP binding;ATPase activity;binding;catalytic activity;CTP binding;dATP binding;deoxyribonucleotide binding;enzyme regulator activity;GTP binding;guanyl nucleotide binding;guanyl ribonucleotide binding;hydrolase activity;hydrolase activity, acting on acid anhydrides;hydrolase activity, actin…	apical plasma membrane;basolateral plasma membrane;brush border membrane;cell body;cell part;cell projection;cell projection membrane;cell projection part;cell surface;cytoplasm;cytoplasmic membrane-bounded vesicle;cytoplasmic part;cytoplasmic vesicle;cytosol;extracellular matrix;extracellular membrane-bounded organelle;extracellular organelle;extracellular region part;extracellular vesicular exo…	Antigen processing and presentation;NOD-like receptor signaling pathway;Pathways in cancer;Plant-pathogen interaction;Progesterone-mediated oocyte maturation;Prostate cancer;Protein processing in endoplasmic reticulum	20	12	12	28.4	18.4	18.4	84.787	101.61	1056500000	231	5	13	12	12	12	13	15	12	18	12	19	6	6	5	5	7	8	6	10	7	11	6	6	5	5	7	8	6	10	7	11	42792000
Q3UAD6;P08113;F7C312	Q3UAD6;P08113;F7C312	Endoplasmin	Hsp90b1	actin cytoskeleton organization;actin filament organization;actin filament-based process;actin rod assembly;biological regulation;catabolic process;cellular catabolic process;cellular component assembly;cellular component assembly at cellular level;cellular component organization;cellular component organization at cellular level;cellular component organization or biogenesis;cellular component org…	adenyl nucleotide binding;adenyl ribonucleotide binding;ATP binding;binding;enzyme binding;lipoprotein particle receptor binding;low-density lipoprotein particle receptor binding;nucleic acid binding;nucleotide binding;phosphatase binding;protein binding;protein phosphatase binding;purine nucleotide binding;purine ribonucleoside triphosphate binding;purine ribonucleotide binding;receptor binding;…	adherens junction;anchoring junction;cell junction;cell part;cell-substrate adherens junction;cell-substrate junction;cytoplasmic membrane-bounded vesicle;cytoplasmic part;cytoplasmic vesicle;cytosol;endoplasmic reticulum;endoplasmic reticulum chaperone complex;endoplasmic reticulum lumen;endoplasmic reticulum membrane;endoplasmic reticulum part;extracellular matrix;extracellular membrane-bounded…	NOD-like receptor signaling pathway;Pathways in cancer;Plant-pathogen interaction;Prostate cancer;Protein processing in endoplasmic reticulum	41	41	39	49.4	49.4	47.6	92.475	323.31	18968000000	2891	3	30	29	32	32	34	35	31	37	37	37	30	29	32	32	34	35	31	37	37	37	29	28	31	31	33	34	30	35	35	35	1641900000
Q3TXU4;P08226;G3UWN5;G3UZM8	Q3TXU4;P08226	Apolipoprotein E	Apoe	acylglycerol catabolic process;acylglycerol metabolic process;aging;alcohol metabolic process;alpha-amino-3-hydroxy-5-methyl-4-isoxazole propionate receptor clustering;anatomical structure development;anatomical structure morphogenesis;artery morphogenesis;biological regulation;biosynthetic process;blood vessel morphogenesis;calcium ion homeostasis;carboxylic acid transport;cardiovascular system …	antioxidant activity;beta-amyloid binding;binding;carbohydrate binding;cation binding;cholesterol binding;cholesterol transporter activity;cytoskeletal protein binding;enzyme activator activity;enzyme regulator activity;glycosaminoglycan binding;heparin binding;hydroxyapatite binding;identical protein binding;ion binding;lipid binding;lipid transporter activity;lipoprotein particle binding;lipopr…	blood microparticle;cell body;cell part;cell projection;chylomicron;cytoplasmic part;cytoskeletal part;cytosol;dendrite;discoidal high-density lipoprotein particle;early endosome;endoplasmic reticulum;endosome;envelope;extracellular matrix;extracellular membrane-bounded organelle;extracellular organelle;extracellular region;extracellular region part;extracellular space;extracellular vesicular exo…	Alzheimer's disease	14	14	14	38.3	38.3	38.3	35.866	323.31	12295000000	1186	4	11	12	11	11	13	11	13	13	11	12	11	12	11	11	13	11	13	13	11	12	11	12	11	11	13	11	13	13	11	12	1034700000
P08228	P08228	Superoxide dismutase [Cu-Zn]	Sod1	activation of MAPK activity;aging;amine metabolic process;anatomical structure homeostasis;anterograde axon cargo transport;auditory receptor cell stereocilium organization;axon cargo transport;behavior;biological regulation;biosynthetic process;carboxylic acid metabolic process;cation homeostasis;cell aging;cell projection organization;cellular amine metabolic process;cellular amino acid metabol…	antioxidant activity;binding;catalytic activity;cation binding;chaperone binding;copper ion binding;enzyme binding;GTPase binding;identical protein binding;ion binding;metal ion binding;oxidoreductase activity;oxidoreductase activity, acting on superoxide radicals as acceptor;phosphatase binding;protein binding;protein phosphatase 2B binding;protein phosphatase binding;Rac GTPase binding;Ras GTPa…	cell body;cell part;cell projection cytoplasm;cell projection part;cytoplasm;cytoplasmic membrane-bounded vesicle;cytoplasmic part;cytoplasmic vesicle;cytosol;dendrite cytoplasm;dense core granule;extracellular matrix;extracellular membrane-bounded organelle;extracellular organelle;extracellular region part;extracellular space;extracellular vesicular exosome;intracellular membrane-bounded organel…	Amyotrophic lateral sclerosis (ALS);Huntington's disease;Peroxisome;Prion diseases	4	4	4	32.5	32.5	32.5	15.942	140.03	3317100000	461	1	4	4	4	4	4	3	4	4	4	4	4	4	4	4	4	3	4	4	4	4	4	4	4	4	4	3	4	4	4	4	230170000
P08249;A0A0G2JF23;A0A0G2JGY4	P08249	Malate dehydrogenase, mitochondrial	Mdh2	acetyl-CoA catabolic process;acetyl-CoA metabolic process;carbohydrate metabolic process;carboxylic acid metabolic process;catabolic process;cellular catabolic process;cellular ketone metabolic process;cellular macromolecule metabolic process;cellular metabolic process;cellular nitrogen compound metabolic process;cellular process;cellular protein metabolic process;coenzyme catabolic process;coenz…	catalytic activity;L-malate dehydrogenase activity;malate dehydrogenase (NADP+) activity;malate dehydrogenase activity;oxidoreductase activity;oxidoreductase activity, acting on CH-OH group of donors;oxidoreductase activity, acting on the CH-OH group of donors, NAD or NADP as acceptor	cell part;cytoplasmic part;extracellular membrane-bounded organelle;extracellular organelle;extracellular region part;extracellular vesicular exosome;intracellular membrane-bounded organelle;intracellular organelle;intracellular organelle lumen;intracellular organelle part;intracellular part;membrane;membrane-bounded organelle;membrane-bounded vesicle;membrane-enclosed lumen;mitochondrial inner m…	Carbon fixation in photosynthetic organisms;Citrate cycle (TCA cycle);Glyoxylate and dicarboxylate metabolism;Pyruvate metabolism	17	17	17	63.6	63.6	63.6	35.611	323.31	9436700000	1482	3	16	14	13	14	16	15	15	16	15	15	16	14	13	14	16	15	15	16	15	15	16	14	13	14	16	15	15	16	15	15	486510000
P09055	P09055	Integrin beta-1	Itgb1	actin cytoskeleton organization;actin filament-based process;actomyosin structure organization;anatomical structure development;anatomical structure homeostasis;anatomical structure morphogenesis;associative learning;axon extension;behavior;biological adhesion;biological regulation;blood vessel endothelial cell migration;calcium ion homeostasis;calcium-independent cell-matrix adhesion;cardiac cel…	actin binding;binding;cation binding;cell adhesion molecule binding;cytoskeletal protein binding;enzyme binding;integrin binding;ion binding;metal ion binding;peptide binding;protease binding;protein binding;protein complex binding;protein dimerization activity;protein heterodimerization activity;receptor activity;receptor binding	acrosomal vesicle;adherens junction;alpha10-beta1 integrin complex;alpha11-beta1 integrin complex;alpha1-beta1 integrin complex;alpha2-beta1 integrin complex;alpha3-beta1 integrin complex;alpha7-beta1 integrin complex;alpha9-beta1 integrin complex;anchoring junction;basement membrane;cell junction;cell part;cell projection;cell projection membrane;cell projection part;cell surface;cell-cell conta…	Arrhythmogenic right ventricular cardiomyopathy (ARVC);Axon guidance;Bacterial invasion of epithelial cells;Cell adhesion molecules (CAMs);Dilated cardiomyopathy;ECM-receptor interaction;Focal adhesion;Hypertrophic cardiomyopathy (HCM);Leishmaniasis;Leukocyte transendothelial migration;Pathogenic Escherichia coli infection;Pathways in cancer;Phagosome;Regulation of actin cytoskeleton;Shigellosis;…	14	14	14	21.7	21.7	21.7	88.231	142.96	977730000	287	1	11	10	10	12	12	10	11	8	10	8	11	10	10	12	12	10	11	8	10	8	11	10	10	12	12	10	11	8	10	8	122400000
P09103;E9Q8G8	P09103	Protein disulfide-isomerase	P4hb	4-hydroxyproline metabolic process;amine metabolic process;biological regulation;carboxylic acid metabolic process;cell redox homeostasis;cellular amine metabolic process;cellular amino acid metabolic process;cellular homeostasis;cellular ketone metabolic process;cellular macromolecule metabolic process;cellular metabolic process;cellular modified amino acid metabolic process;cellular nitrogen co…	catalytic activity;intramolecular oxidoreductase activity;intramolecular oxidoreductase activity, interconverting keto- and enol-groups;intramolecular oxidoreductase activity, transposing S-S bonds;isomerase activity;oxidoreductase activity;oxidoreductase activity, acting on paired donors, with incorporation or reduction of molecular oxygen;oxidoreductase activity, acting on paired donors, with i…	adherens junction;anchoring junction;cell junction;cell part;cell-substrate adherens junction;cell-substrate junction;cytoplasmic membrane-bounded vesicle;cytoplasmic part;cytoplasmic vesicle;endoplasmic reticulum;endoplasmic reticulum chaperone complex;endoplasmic reticulum lumen;endoplasmic reticulum part;endoplasmic reticulum-Golgi intermediate compartment;extracellular membrane-bounded organe…	Protein processing in endoplasmic reticulum	32	32	32	63.1	63.1	63.1	57.058	323.31	47601000000	6973	2	30	28	30	30	31	30	29	27	27	28	30	28	30	30	31	30	29	27	27	28	30	28	30	30	31	30	29	27	27	28	4583000000
P09405	P09405	Nucleolin	Ncl	anatomical structure formation involved in morphogenesis;angiogenesis;biological regulation;developmental process;positive regulation of biological process;positive regulation of biosynthetic process;positive regulation of cellular biosynthetic process;positive regulation of cellular metabolic process;positive regulation of cellular process;positive regulation of gene expression;positive regulati…	binding;DNA binding;identical protein binding;nucleic acid binding;nucleotide binding;protein binding;protein C-terminus binding;RNA binding;sequence-specific DNA binding;telomeric DNA binding	cell cortex;cell part;cytoplasmic part;extracellular membrane-bounded organelle;extracellular organelle;extracellular region part;extracellular vesicular exosome;intracellular membrane-bounded organelle;intracellular non-membrane-bounded organelle;intracellular organelle;intracellular organelle part;intracellular part;macromolecular complex;membrane;membrane-bounded organelle;membrane-bounded ves…	Pathogenic Escherichia coli infection	9	9	9	12.7	12.7	12.7	76.722	16.745	304640000	58	1	1	4	2	4	5	5	6	6	7	8	1	4	2	4	5	5	6	6	7	8	1	4	2	4	5	5	6	6	7	8	1959400
P09411;S4R2M7;P09041	P09411;S4R2M7	Phosphoglycerate kinase 1;Phosphoglycerate kinase	Pgk1	alcohol catabolic process;alcohol metabolic process;carbohydrate catabolic process;carbohydrate metabolic process;catabolic process;cell motility;cellular carbohydrate catabolic process;cellular carbohydrate metabolic process;cellular component movement;cellular metabolic process;cellular process;generation of precursor metabolites and energy;glucose catabolic process;glucose metabolic process;gl…	adenyl nucleotide binding;adenyl ribonucleotide binding;ATP binding;binding;catalytic activity;kinase activity;nucleotide binding;phosphoglycerate kinase activity;phosphotransferase activity, carboxyl group as acceptor;purine nucleotide binding;purine ribonucleoside triphosphate binding;purine ribonucleotide binding;ribonucleotide binding;transferase activity;transferase activity, transferring ph…	cell part;cell projection;cell projection part;cilium;cytoplasm;extracellular membrane-bounded organelle;extracellular organelle;extracellular region part;extracellular vesicular exosome;flagellar fibrous sheath;flagellum part;intracellular membrane-bounded organelle;intracellular organelle;intracellular organelle part;intracellular part;membrane-bounded organelle;membrane-bounded vesicle;microtu…	Carbon fixation in photosynthetic organisms;Glycolysis / Gluconeogenesis	19	19	19	56.1	56.1	56.1	44.55	323.31	3878300000	761	3	16	14	14	14	15	13	14	18	15	18	16	14	14	14	15	13	14	18	15	18	16	14	14	14	15	13	14	18	15	18	241470000
Q4FJX9;P09671	Q4FJX9;P09671	Superoxide dismutase;Superoxide dismutase [Mn], mitochondrial	Sod2	age-dependent response to oxidative stress;age-dependent response to reactive oxygen species;amine metabolic process;anatomical structure development;apoptotic mitochondrial changes;behavior;biological regulation;biosynthetic process;carboxylic acid metabolic process;cation homeostasis;cell development;cell differentiation;cellular amine metabolic process;cellular amino acid metabolic process;cel…	antioxidant activity;binding;catalytic activity;cation binding;DNA binding;identical protein binding;ion binding;manganese ion binding;metal ion binding;nucleic acid binding;oxidoreductase activity;oxidoreductase activity, acting on superoxide radicals as acceptor;oxygen binding;protein binding;superoxide dismutase activity;transition metal ion binding	cell part;cytoplasmic part;extracellular membrane-bounded organelle;extracellular organelle;extracellular region part;extracellular vesicular exosome;intracellular membrane-bounded organelle;intracellular non-membrane-bounded organelle;intracellular organelle;intracellular organelle part;intracellular part;membrane;membrane-bounded organelle;membrane-bounded vesicle;mitochondrial inner membrane;m…	Huntington's disease;Peroxisome	6	6	6	27	27	27	24.603	73.881	1461100000	304	2	5	4	4	4	5	5	5	6	5	4	5	4	4	4	5	5	5	6	5	4	5	4	4	4	5	5	5	6	5	4	120250000
P0DN34	P0DN34							3	3	3	66.7	66.7	66.7	6.954	38.247	669000000	169	1	2	2	2	2	2	2	2	3	3	3	2	2	2	2	2	2	2	3	3	3	2	2	2	2	2	2	2	3	3	3	51353000
Q58E64;P10126;D3YZ68;D3Z3I8;P62631	Q58E64;P10126;D3YZ68	Elongation factor 1-alpha;Elongation factor 1-alpha 1	Eef1a1	biological regulation;biosynthetic process;cellular biosynthetic process;cellular macromolecule biosynthetic process;cellular macromolecule metabolic process;cellular metabolic process;cellular process;cellular response to chemical stimulus;cellular response to endogenous stimulus;cellular response to epidermal growth factor stimulus;cellular response to growth factor stimulus;cellular response t…	binding;catalytic activity;enzyme binding;GTP binding;GTPase activity;guanyl nucleotide binding;guanyl ribonucleotide binding;hydrolase activity;hydrolase activity, acting on acid anhydrides;hydrolase activity, acting on acid anhydrides, in phosphorus-containing anhydrides;kinase binding;nucleic acid binding;nucleoside-triphosphatase activity;nucleotide binding;protein binding;protein kinase bind…	cell body;cell cortex part;cell part;cell projection membrane;cell projection part;cortical actin cytoskeleton;cortical cytoskeleton;cytoplasm;cytoplasmic part;cytoskeletal part;cytoskeleton;cytosol;eukaryotic translation elongation factor 1 complex;extracellular membrane-bounded organelle;extracellular organelle;extracellular region part;extracellular space;extracellular vesicular exosome;intrac…	RNA transport	19	19	19	61.7	61.7	61.7	50.113	316.66	19066000000	1585	5	15	14	13	14	14	12	14	14	13	13	15	14	13	14	14	12	14	14	13	13	15	14	13	14	14	12	14	14	13	13	1782800000
P10518	P10518	Delta-aminolevulinic acid dehydratase	Alad	biosynthetic process;cellular aromatic compound metabolic process;cellular biosynthetic process;cellular component assembly;cellular component organization;cellular component organization or biogenesis;cellular metabolic process;cellular nitrogen compound biosynthetic process;cellular nitrogen compound metabolic process;cellular process;cellular response to chemical stimulus;cellular response to …	binding;carbon-oxygen lyase activity;catalytic activity;cation binding;hydro-lyase activity;identical protein binding;ion binding;lead ion binding;lyase activity;metal ion binding;porphobilinogen synthase activity;protein binding;transition metal ion binding;zinc ion binding	cell part;cytoplasmic part;cytosol;extracellular membrane-bounded organelle;extracellular organelle;extracellular region part;extracellular vesicular exosome;intracellular membrane-bounded organelle;intracellular organelle;intracellular part;membrane-bounded organelle;membrane-bounded vesicle;nucleus;organelle;vesicle	Porphyrin and chlorophyll metabolism	12	12	12	43.3	43.3	43.3	36.023	204.01	669460000	183	1	5	5	6	6	6	5	5	10	10	12	5	5	6	6	6	5	5	10	10	12	5	5	6	6	6	5	5	10	10	12	39530000
P10605	P10605	Cathepsin B;Cathepsin B light chain;Cathepsin B heavy chain	Ctsb	anatomical structure development;biological regulation;cell differentiation;cellular developmental process;cellular process;cellular response to chemical stimulus;cellular response to endogenous stimulus;cellular response to hormone stimulus;cellular response to organic substance;cellular response to stimulus;cellular response to thyroid hormone stimulus;collagen catabolic process;collagen metabo…	binding;catalytic activity;collagen binding;cysteine-type endopeptidase activity;cysteine-type peptidase activity;endopeptidase activity;glycoprotein binding;hydrolase activity;peptidase activity;peptidase activity, acting on L-amino acid peptides;protein binding;proteoglycan binding	cell part;cytoplasmic membrane-bounded vesicle;cytoplasmic part;cytoplasmic vesicle;extracellular membrane-bounded organelle;extracellular organelle;extracellular region part;extracellular space;extracellular vesicular exosome;intracellular membrane-bounded organelle;intracellular non-membrane-bounded organelle;intracellular organelle;intracellular organelle part;intracellular part;lysosome;lytic…	Antigen processing and presentation;Lysosome	8	8	8	28.6	28.6	28.6	37.279	26.423	967460000	209	1	5	4	4	5	6	6	5	8	7	7	5	4	4	5	6	6	5	8	7	7	5	4	4	5	6	6	5	8	7	7	48982000
P10639	P10639	Thioredoxin	Txn	biological regulation;biosynthetic process;cell redox homeostasis;cellular biosynthetic process;cellular homeostasis;cellular macromolecule biosynthetic process;cellular macromolecule metabolic process;cellular metabolic process;cellular nitrogen compound metabolic process;cellular process;cellular protein metabolic process;cellular response to chemical stimulus;cellular response to oxidative str…	catalytic activity;disulfide oxidoreductase activity;oxidoreductase activity;oxidoreductase activity, acting on a sulfur group of donors;oxidoreductase activity, acting on a sulfur group of donors, disulfide as acceptor;peptide disulfide oxidoreductase activity;protein disulfide oxidoreductase activity	cell part;cytoplasm;cytoplasmic part;cytosol;extracellular membrane-bounded organelle;extracellular organelle;extracellular region part;extracellular vesicular exosome;intracellular membrane-bounded organelle;intracellular organelle;intracellular part;membrane-bounded organelle;membrane-bounded vesicle;mitochondrion;nucleus;organelle;vesicle		5	5	5	57.1	57.1	57.1	11.675	36.978	1846200000	251	1	4	3	3	3	2	2	2	3	4	4	4	3	3	3	2	2	2	3	4	4	4	3	3	3	2	2	2	3	4	4	145360000
P10649;A2AE89	P10649;A2AE89	Glutathione S-transferase Mu 1	Gstm1	amine metabolic process;carboxylic acid metabolic process;cellular amine metabolic process;cellular amino acid metabolic process;cellular ketone metabolic process;cellular metabolic process;cellular modified amino acid metabolic process;cellular nitrogen compound metabolic process;cellular process;cellular response to chemical stimulus;cellular response to drug;cellular response to stimulus;gluta…	binding;catalytic activity;glutathione transferase activity;identical protein binding;protein binding;protein dimerization activity;protein heterodimerization activity;protein homodimerization activity;transferase activity;transferase activity, transferring alkyl or aryl (other than methyl) groups	cell part;cytoplasm;intracellular part;myelin sheath	Drug metabolism - cytochrome P450;Glutathione metabolism;Metabolism of xenobiotics by cytochrome P450	19	19	8	75.7	75.7	28.9	25.97	323.31	11745000000	1332	2	15	16	16	16	15	15	15	18	19	19	15	16	16	16	15	15	15	18	19	19	6	7	7	7	6	6	6	7	8	8	628590000
P10922	P10922	Histone H1.0;Histone H1.0, N-terminally processed	H1f0	cellular component assembly;cellular component assembly at cellular level;cellular component organization;cellular component organization at cellular level;cellular component organization or biogenesis;cellular component organization or biogenesis at cellular level;cellular macromolecular complex assembly;cellular macromolecular complex subunit organization;cellular process;chromatin organization…	binding;chromatin binding;chromatin DNA binding;DNA binding;nucleic acid binding;structure-specific DNA binding	actin cytoskeleton;cell part;chromatin;chromosomal part;cytoplasmic part;cytoskeleton;euchromatin;Golgi apparatus;intracellular membrane-bounded organelle;intracellular non-membrane-bounded organelle;intracellular organelle;intracellular organelle part;intracellular part;macromolecular complex;membrane-bounded organelle;non-membrane-bounded organelle;nuclear chromatin;nuclear chromosome part;nucl…		5	5	5	27.3	27.3	27.3	20.861	11.553	3317900000	141	1	2	3	2	3	4	5	4	5	3	4	2	3	2	3	4	5	4	5	3	4	2	3	2	3	4	5	4	5	3	4	285500000
P11352;A0A0A6YVV2;A0A0A6YY34	P11352;A0A0A6YVV2;A0A0A6YY34	Glutathione peroxidase 1;Glutathione peroxidase	Gpx1	acylglycerol metabolic process;aging;amine metabolic process;anatomical structure development;anatomical structure formation involved in morphogenesis;anatomical structure morphogenesis;angiogenesis;angiogenesis involved in wound healing;apoptosis;biological regulation;blood vessel endothelial cell migration;carboxylic acid metabolic process;catabolic process;cell death;cell development;cell diff…	amine binding;amino acid binding;antioxidant activity;binding;carboxylic acid binding;catalytic activity;glutathione binding;glutathione peroxidase activity;modified amino acid binding;oxidoreductase activity;oxidoreductase activity, acting on paired donors, with incorporation or reduction of molecular oxygen;oxidoreductase activity, acting on peroxide as acceptor;peptide binding;peroxidase activ…	cell part;cytoplasm;cytoplasmic part;extracellular membrane-bounded organelle;extracellular organelle;extracellular region part;extracellular vesicular exosome;intracellular membrane-bounded organelle;intracellular organelle;intracellular part;membrane-bounded organelle;membrane-bounded vesicle;mitochondrion;nucleus;organelle;vesicle	Arachidonic acid metabolism;Glutathione metabolism	13	13	13	62.7	62.7	62.7	22.329	298.49	4646300000	914	3	8	9	9	9	11	9	10	10	10	11	8	9	9	9	11	9	10	10	10	11	8	9	9	9	11	9	10	10	10	11	273020000
Q3TA96;P11438	Q3TA96;P11438	Lysosome-associated membrane glycoprotein 1	Lamp1	autophagic cell death;autophagy;biological regulation;catabolic process;cell death;cellular catabolic process;cellular metabolic process;cellular process;death;establishment of localization;establishment of localization in cell;establishment of protein localization;establishment of protein localization to organelle;gamete generation;Golgi to lysosome transport;Golgi vesicle transport;induction of…	binding;enzyme binding;protein binding;protein domain specific binding	cell body;cell part;cell projection;cell surface;clathrin-coated vesicle;coated vesicle;cytolytic granule;cytoplasm;cytoplasmic membrane-bounded vesicle;cytoplasmic part;cytoplasmic vesicle;dendrite;endosomal part;endosome;endosome membrane;external side of plasma membrane;extracellular membrane-bounded organelle;extracellular organelle;extracellular region part;extracellular vesicular exosome;in…	ko05152;Lysosome;Phagosome	3	3	3	9.4	9.4	9.4	43.865	21.971	1045500000	110	2	2	2	2	2	2	2	3	2	3	2	2	2	2	2	2	2	3	2	3	2	2	2	2	2	2	2	3	2	3	2	107580000
Q71LX8;P11499;E9Q3D6;E9Q0C3;E9PX27;D3Z1R1	Q71LX8;P11499	Heat shock protein HSP 90-beta	Hsp90ab1	anatomical structure development;biological regulation;cellular component organization;cellular component organization or biogenesis;cellular macromolecule metabolic process;cellular metabolic process;cellular process;cellular protein metabolic process;cellular response to chemical stimulus;cellular response to cytokine stimulus;cellular response to interleukin-4;cellular response to organic cycl…	adenyl deoxyribonucleotide binding;adenyl nucleotide binding;adenyl ribonucleotide binding;antigen binding;ATP binding;binding;CTP binding;dATP binding;deoxyribonucleotide binding;double-stranded RNA binding;enzyme binding;enzyme regulator activity;GTP binding;guanyl nucleotide binding;guanyl ribonucleotide binding;kinase binding;MHC class II protein complex binding;MHC protein complex binding;ni…	apical plasma membrane;basolateral plasma membrane;brush border membrane;cell part;cell projection membrane;cell projection part;cell surface;cytoplasm;cytoplasmic membrane-bounded vesicle;cytoplasmic part;cytoplasmic vesicle;cytosol;extracellular membrane-bounded organelle;extracellular organelle;extracellular region part;extracellular vesicular exosome;inclusion body;intracellular;intracellular…	Antigen processing and presentation;NOD-like receptor signaling pathway;Pathways in cancer;Plant-pathogen interaction;Progesterone-mediated oocyte maturation;Prostate cancer;Protein processing in endoplasmic reticulum	32	30	22	47.5	45.6	35.5	83.28	323.31	4557200000	821	6	22	20	20	21	21	22	22	29	22	26	21	19	19	20	20	21	21	27	20	24	14	13	12	13	14	14	15	19	15	16	338780000
P11688	P11688	Integrin alpha-5;Integrin alpha-5 heavy chain;Integrin alpha-5 light chain	Itga5	behavior;biological adhesion;biological regulation;cell adhesion;cell adhesion mediated by integrin;cell differentiation;cell junction assembly;cell junction organization;cell migration;cell motility;cell surface receptor linked signaling pathway;cell-cell adhesion;cell-cell adhesion mediated by integrin;cell-substrate adhesion;cell-substrate junction assembly;cellular component assembly;cellular…	binding;cation binding;integrin binding;ion binding;metal ion binding;protein binding;protein complex binding;receptor binding	adherens junction;anchoring junction;cell junction;cell part;cell projection membrane;cell projection part;cell surface;cell-cell junction;cell-substrate adherens junction;cell-substrate junction;cytoplasmic part;cytoplasmic vesicle;endoplasmic reticulum;external side of plasma membrane;focal adhesion;Golgi apparatus;integrin complex;intracellular membrane-bounded organelle;intracellular organell…	Arrhythmogenic right ventricular cardiomyopathy (ARVC);Bacterial invasion of epithelial cells;Dilated cardiomyopathy;ECM-receptor interaction;Focal adhesion;Hematopoietic cell lineage;Hypertrophic cardiomyopathy (HCM);Phagosome;Regulation of actin cytoskeleton;Shigellosis	3	3	3	2.5	2.5	2.5	115.04	2.5993	82677000	13	1	2	2	3	1	3	2	3	0	2	0	2	2	3	1	3	2	3	0	2	0	2	2	3	1	3	2	3	0	2	0	18001000
P11714	P11714	Cytochrome P450 2D9	Cyp2d9	arachidonic acid metabolic process;carboxylic acid metabolic process;catabolic process;cellular catabolic process;cellular ketone metabolic process;cellular lipid metabolic process;cellular metabolic process;cellular process;drug catabolic process;drug metabolic process;exogenous drug catabolic process;fatty acid metabolic process;icosanoid metabolic process;lipid metabolic process;metabolic proc…	arachidonic acid epoxygenase activity;arachidonic acid monooxygenase activity;aromatase activity;binding;catalytic activity;cation binding;heme binding;ion binding;iron ion binding;metal ion binding;monooxygenase activity;oxidoreductase activity;oxidoreductase activity, acting on paired donors, with incorporation or reduction of molecular oxygen;oxidoreductase activity, acting on paired donors, w…	cell part;cytoplasm;cytoplasmic part;endoplasmic reticulum membrane;endoplasmic reticulum part;intracellular membrane-bounded organelle;intracellular organelle;intracellular organelle part;intracellular part;membrane;membrane part;membrane-bounded organelle;organelle;organelle membrane;organelle part	Drug metabolism - cytochrome P450	21	14	8	46	29.6	20.4	56.949	323.31	2933500000	803	1	16	16	18	18	17	14	18	13	15	12	12	12	14	13	12	9	12	7	10	6	7	7	8	8	7	6	7	6	7	4	414410000
Q543H3;P11725;Q8R1A8	Q543H3;P11725;Q8R1A8	Ornithine carbamoyltransferase, mitochondrial	Otc	amide biosynthetic process;amine biosynthetic process;amine catabolic process;amine metabolic process;anatomical structure development;arginine biosynthetic process;arginine biosynthetic process via ornithine;arginine metabolic process;biosynthetic process;carboxylic acid biosynthetic process;carboxylic acid catabolic process;carboxylic acid metabolic process;catabolic process;cellular amide meta…	amine binding;amino acid binding;anion binding;binding;carboxyl- or carbamoyltransferase activity;carboxylic acid binding;catalytic activity;ion binding;lipid binding;ornithine carbamoyltransferase activity;phosphate ion binding;phospholipid binding;transferase activity;transferase activity, transferring one-carbon groups	cell part;cytoplasmic part;intracellular membrane-bounded organelle;intracellular organelle;intracellular organelle lumen;intracellular organelle part;intracellular part;membrane;membrane-bounded organelle;membrane-enclosed lumen;mitochondrial inner membrane;mitochondrial matrix;mitochondrial membrane;mitochondrial part;mitochondrion;organelle;organelle inner membrane;organelle lumen;organelle me…	Arginine and proline metabolism	20	20	20	79.7	79.7	79.7	39.764	323.31	11218000000	1720	3	14	16	16	17	15	14	15	18	16	17	14	16	16	17	15	14	15	18	16	17	14	16	16	17	15	14	15	18	16	17	513470000
P11983;F2Z483	P11983	T-complex protein 1 subunit alpha	Tcp1	binding of sperm to zona pellucida;biological regulation;cell recognition;cell-cell recognition;cellular macromolecule metabolic process;cellular metabolic process;cellular process;cellular process involved in reproduction;cellular protein metabolic process;establishment of localization;establishment of protein localization;interaction with host;interspecies interaction between organisms;macromol…	adenyl nucleotide binding;adenyl ribonucleotide binding;ATP binding;binding;enzyme binding;nucleotide binding;protein binding;purine nucleotide binding;purine ribonucleoside triphosphate binding;purine ribonucleotide binding;ribonucleotide binding;ubiquitin protein ligase binding	acrosomal vesicle;cell body;cell part;centrosome;chaperonin-containing T-complex;chromatin;chromosomal part;cytoplasmic membrane-bounded vesicle;cytoplasmic part;cytoplasmic vesicle;cytoskeletal part;cytosolic part;extracellular membrane-bounded organelle;extracellular organelle;extracellular region part;extracellular vesicular exosome;Golgi apparatus;heterochromatin;intracellular membrane-bounde…		17	17	17	39	39	39	60.448	70.69	1384500000	285	2	11	9	4	8	14	12	9	17	9	11	11	9	4	8	14	12	9	17	9	11	11	9	4	8	14	12	9	17	9	11	140610000
Q3V2F7;P12710	Q3V2F7;P12710	Fatty acid-binding protein, liver	Fabp1	biological regulation;cellular process;cellular response to chemical stimulus;cellular response to hydrogen peroxide;cellular response to hypoxia;cellular response to oxidative stress;cellular response to oxygen levels;cellular response to reactive oxygen species;cellular response to stimulus;cellular response to stress;digestive system process;intestinal absorption;multicellular organismal proce…	antioxidant activity;bile acid binding;binding;carboxylic acid binding;chromatin binding;drug binding;fatty acid binding;fatty acid transporter activity;lipid binding;lipid transporter activity;long-chain fatty acid transporter activity;monocarboxylic acid binding;phospholipid binding;steroid binding;substrate-specific transporter activity;transporter activity	apical cortex;cell cortex part;cell part;cytoplasm;cytoplasmic part;cytosol;extracellular membrane-bounded organelle;extracellular organelle;extracellular region part;extracellular vesicular exosome;intracellular membrane-bounded organelle;intracellular organelle;intracellular organelle lumen;intracellular organelle part;intracellular part;membrane-bounded organelle;membrane-bounded vesicle;membr…	Fat digestion and absorption;PPAR signaling pathway	8	8	8	66.9	66.9	66.9	14.245	138.59	14367000000	837	2	7	7	6	8	8	7	7	7	6	8	7	7	6	8	8	7	7	7	6	8	7	7	6	8	8	7	7	7	6	8	1572600000
P12787	P12787	Cytochrome c oxidase subunit 5A, mitochondrial	Cox5a		binding;catalytic activity;cation binding;cation transmembrane transporter activity;cytochrome-c oxidase activity;heme-copper terminal oxidase activity;hydrogen ion transmembrane transporter activity;inorganic cation transmembrane transporter activity;ion binding;ion transmembrane transporter activity;metal ion binding;monovalent inorganic cation transmembrane transporter activity;oxidoreductase …	cell part;cytoplasmic part;extracellular membrane-bounded organelle;extracellular organelle;extracellular region part;extracellular vesicular exosome;intracellular membrane-bounded organelle;intracellular organelle;intracellular organelle part;intracellular part;membrane;membrane-bounded organelle;membrane-bounded vesicle;mitochondrial inner membrane;mitochondrial membrane;mitochondrial part;mito…	Alzheimer's disease;Cardiac muscle contraction;Huntington's disease;Oxidative phosphorylation;Parkinson's disease	10	10	10	54.1	54.1	54.1	16.101	314.83	6448200000	890	1	7	7	8	7	8	7	8	7	7	8	7	7	8	7	8	7	8	7	7	8	7	7	8	7	8	7	8	7	7	8	511150000
P12815	P12815	Programmed cell death protein 6	Pdcd6	activation of caspase activity;anatomical structure formation involved in morphogenesis;angiogenesis;apoptosis;biological regulation;cell death;cellular process;cellular response to heat;cellular response to stimulus;cellular response to stress;death;developmental process;establishment of localization;establishment of localization in cell;establishment of protein localization;intracellular protei…	binding;binding, bridging;calcium ion binding;calcium-dependent cysteine-type endopeptidase activity;calcium-dependent protein binding;catalytic activity;cation binding;cysteine-type endopeptidase activity;cysteine-type peptidase activity;endopeptidase activity;hydrolase activity;identical protein binding;ion binding;metal ion binding;peptidase activity;peptidase activity, acting on L-amino acid …	cell part;cytoplasm;cytoplasmic part;cytoplasmic vesicle;endoplasmic reticulum;endoplasmic reticulum exit site;endoplasmic reticulum membrane;endoplasmic reticulum part;endosome;extracellular membrane-bounded organelle;extracellular organelle;extracellular region part;extracellular vesicular exosome;intracellular membrane-bounded organelle;intracellular organelle;intracellular organelle part;intr…		5	5	5	28.3	28.3	28.3	21.867	18.743	364680000	134	1	5	4	4	4	5	5	5	4	5	3	5	4	4	4	5	5	5	4	5	3	5	4	4	4	5	5	5	4	5	3	35266000
Q58ET1;P12970;A0A140T8L1;A0A140T8L3;F6VBB8;V9GX35	Q58ET1;P12970;A0A140T8L1;A0A140T8L3	60S ribosomal protein L7a	Rpl7a	cellular component biogenesis;cellular component biogenesis at cellular level;cellular component organization or biogenesis;cellular component organization or biogenesis at cellular level;cellular process;ribonucleoprotein complex biogenesis;ribosome biogenesis		adherens junction;anchoring junction;cell junction;cell part;cell-substrate adherens junction;cell-substrate junction;cytoplasm;cytoplasmic part;cytosolic large ribosomal subunit;extracellular membrane-bounded organelle;extracellular organelle;extracellular region part;extracellular vesicular exosome;focal adhesion;intracellular membrane-bounded organelle;intracellular non-membrane-bounded organe…	Ribosome	15	15	15	50.8	50.8	50.8	29.976	142.74	2552300000	347	6	6	11	11	9	9	10	10	14	13	12	6	11	11	9	9	10	10	14	13	12	6	11	11	9	9	10	10	14	13	12	114900000
Q547C4;P13516;Q99PL7;P13011;Q6T707	Q547C4;P13516;Q99PL7;P13011	Acyl-CoA desaturase 1;Acyl-CoA desaturase 2	Scd1;Scd3;Scd2	biological regulation;biosynthetic process;brown fat cell differentiation;carboxylic acid biosynthetic process;carboxylic acid metabolic process;cell differentiation;cellular biosynthetic process;cellular developmental process;cellular ketone metabolic process;cellular lipid metabolic process;cellular metabolic process;cellular process;cholesterol esterification;defense response;defense response …	binding;catalytic activity;cation binding;CoA desaturase activity;ion binding;iron ion binding;metal ion binding;oxidoreductase activity;oxidoreductase activity, acting on paired donors, with incorporation or reduction of molecular oxygen;oxidoreductase activity, acting on paired donors, with oxidation of a pair of donors resulting in the reduction of molecular oxygen to two molecules of water;pa…	cell part;cytoplasmic part;endoplasmic reticulum;endoplasmic reticulum membrane;endoplasmic reticulum part;integral to endoplasmic reticulum membrane;integral to membrane;integral to organelle membrane;intracellular membrane-bounded organelle;intracellular organelle;intracellular organelle part;intracellular part;intrinsic to endoplasmic reticulum membrane;intrinsic to membrane;intrinsic to organ…	Biosynthesis of unsaturated fatty acids;PPAR signaling pathway	4	4	4	14.4	14.4	14.4	41.046	22.654	322820000	68	5	4	4	3	2	2	4	3	3	2	3	4	4	3	2	2	4	3	3	2	3	4	4	3	2	2	4	3	3	2	3	45377000
Q545P0;P14094;A0A0A6YX05	Q545P0;P14094	Sodium/potassium-transporting ATPase subunit beta-1	Atp1b1	biological adhesion;biological regulation;calcium ion homeostasis;calcium-mediated signaling;cardiac muscle contraction;cation homeostasis;cation transport;cell adhesion;cellular calcium ion homeostasis;cellular cation homeostasis;cellular chemical homeostasis;cellular component organization;cellular component organization or biogenesis;cellular divalent inorganic cation homeostasis;cellular home…	active transmembrane transporter activity;antigen binding;ATPase activator activity;ATPase activity;ATPase activity, coupled;ATPase activity, coupled to movement of substances;ATPase activity, coupled to transmembrane movement of ions;ATPase activity, coupled to transmembrane movement of ions, phosphorylative mechanism;ATPase activity, coupled to transmembrane movement of substances;ATPase bindin…	apical plasma membrane;basolateral plasma membrane;caveola;cell junction;cell part;cell-cell contact zone;cell-cell junction;extracellular membrane-bounded organelle;extracellular organelle;extracellular region part;extracellular vesicular exosome;intercalated disc;macromolecular complex;membrane;membrane part;membrane raft;membrane-bounded organelle;membrane-bounded vesicle;myelin sheath;organel…	Aldosterone-regulated sodium reabsorption;Bile secretion;Carbohydrate digestion and absorption;Cardiac muscle contraction;Endocrine and other factor-regulated calcium reabsorption;Gastric acid secretion;Mineral absorption;Pancreatic secretion;Protein digestion and absorption;Proximal tubule bicarbonate reclamation;Salivary secretion	9	9	9	36.2	36.2	36.2	35.194	98.202	2583000000	450	3	6	7	5	5	7	7	7	7	7	8	6	7	5	5	7	7	7	7	7	8	6	7	5	5	7	7	7	7	7	8	271950000
P14115	P14115	60S ribosomal protein L27a	Rpl27a	biosynthetic process;cellular biosynthetic process;cellular macromolecule biosynthetic process;cellular macromolecule metabolic process;cellular metabolic process;cellular process;cellular protein metabolic process;macromolecule biosynthetic process;macromolecule metabolic process;metabolic process;primary metabolic process;protein metabolic process;translation	structural constituent of ribosome;structural molecule activity	cell part;cytosolic large ribosomal subunit;intracellular organelle part;intracellular part;large ribosomal subunit;macromolecular complex;membrane;organelle part;ribonucleoprotein complex	Ribosome	4	4	4	27.7	27.7	27.7	16.605	16.758	907000000	138	1	3	3	3	2	3	3	3	3	3	4	3	3	3	2	3	3	3	3	3	4	3	3	3	2	3	3	3	3	3	4	61828000
Q5M9N8;P14148;F6XI62	Q5M9N8;P14148;F6XI62	60S ribosomal protein L7	Rpl7	biosynthetic process;cellular biosynthetic process;cellular component biogenesis;cellular component biogenesis at cellular level;cellular component organization or biogenesis;cellular component organization or biogenesis at cellular level;cellular macromolecule biosynthetic process;cellular macromolecule metabolic process;cellular metabolic process;cellular nitrogen compound metabolic process;cel…	binding;DNA binding;identical protein binding;mRNA binding;nucleic acid binding;protein binding;protein dimerization activity;protein homodimerization activity;RNA binding;structural constituent of ribosome;structural molecule activity	adherens junction;anchoring junction;cell junction;cell part;cell-substrate adherens junction;cell-substrate junction;cytoplasm;cytosolic large ribosomal subunit;extracellular membrane-bounded organelle;extracellular organelle;extracellular region part;extracellular vesicular exosome;focal adhesion;intracellular membrane-bounded organelle;intracellular non-membrane-bounded organelle;intracellular…	Ribosome	13	13	13	43	43	43	31.419	104.59	2046100000	374	3	7	9	5	6	8	7	5	13	10	11	7	9	5	6	8	7	5	13	10	11	7	9	5	6	8	7	5	13	10	11	124710000
P14152;B1ATQ3	P14152	Malate dehydrogenase, cytoplasmic	Mdh1	acetyl-CoA catabolic process;acetyl-CoA metabolic process;carbohydrate metabolic process;carboxylic acid metabolic process;catabolic process;cellular catabolic process;cellular ketone metabolic process;cellular metabolic process;cellular nitrogen compound metabolic process;cellular process;coenzyme catabolic process;coenzyme metabolic process;cofactor catabolic process;cofactor metabolic process;…	binding;catalytic activity;coenzyme binding;cofactor binding;L-malate dehydrogenase activity;malate dehydrogenase activity;NAD binding;nucleotide binding;oxidoreductase activity;oxidoreductase activity, acting on CH-OH group of donors;oxidoreductase activity, acting on the CH-OH group of donors, NAD or NADP as acceptor	cell part;centrosome;cytoplasm;cytoplasmic part;cytoskeletal part;cytosol;extracellular membrane-bounded organelle;extracellular organelle;extracellular region part;extracellular space;extracellular vesicular exosome;intracellular membrane-bounded organelle;intracellular non-membrane-bounded organelle;intracellular organelle;intracellular organelle part;intracellular part;membrane-bounded organel…	Carbon fixation in photosynthetic organisms;Citrate cycle (TCA cycle);Glyoxylate and dicarboxylate metabolism;Proximal tubule bicarbonate reclamation;Pyruvate metabolism	12	12	12	41.9	41.9	41.9	36.511	184.65	6713500000	1013	2	10	10	12	10	11	10	9	12	10	12	10	10	12	10	11	10	9	12	10	12	10	10	12	10	11	10	9	12	10	12	510240000
P14206	P14206	40S ribosomal protein SA	Rpsa	biological adhesion;biosynthetic process;cell adhesion;cellular biosynthetic process;cellular component assembly;cellular component assembly at cellular level;cellular component organization;cellular component organization at cellular level;cellular component organization or biogenesis;cellular component organization or biogenesis at cellular level;cellular macromolecular complex assembly;cellula…	binding;extracellular matrix binding;laminin binding;laminin receptor activity;protein binding;receptor activity;ribonucleoprotein binding;ribosome binding;structural constituent of ribosome;structural molecule activity	90S preribosome;cell part;cytoplasm;cytosolic small ribosomal subunit;extracellular membrane-bounded organelle;extracellular organelle;extracellular region part;extracellular vesicular exosome;intracellular membrane-bounded organelle;intracellular organelle;intracellular organelle part;intracellular part;macromolecular complex;membrane;membrane-bounded organelle;membrane-bounded vesicle;nucleus;o…	Ribosome	14	14	14	53.2	53.2	53.2	32.838	300.32	3177500000	562	1	8	10	10	10	11	11	10	11	11	13	8	10	10	10	11	11	10	11	11	13	8	10	10	10	11	11	10	11	11	13	143410000
P14246;E9PXR7	P14246	Solute carrier family 2, facilitated glucose transporter member 2	Slc2a2	anatomical structure development;carbohydrate transport;cation transport;dehydroascorbic acid transport;developmental process;endocrine pancreas development;establishment of localization;glucose import;glucose transport;hexose transport;hydrogen transport;ion transport;monosaccharide transport;monovalent inorganic cation transport;organic substance transport;proton transport;transport;vitamin tra…	active transmembrane transporter activity;carbohydrate transmembrane transporter activity;cation transmembrane transporter activity;cation:sugar symporter activity;dehydroascorbic acid transporter activity;D-glucose transmembrane transporter activity;glucose transmembrane transporter activity;hexose transmembrane transporter activity;ion transmembrane transporter activity;monosaccharide transmemb…	brush border;cell part;cell projection;cytoplasm;integral to membrane;integral to plasma membrane;intracellular part;intrinsic to membrane;intrinsic to plasma membrane;membrane;membrane part;plasma membrane;plasma membrane part	Carbohydrate digestion and absorption;Maturity onset diabetes of the young;Type II diabetes mellitus	6	6	6	14	14	14	57.106	265.39	731530000	284	2	4	4	4	3	4	4	4	5	6	4	4	4	4	3	4	4	4	5	6	4	4	4	4	3	4	4	4	5	6	4	65007000
P14685;F7B7L8	P14685	26S proteasome non-ATPase regulatory subunit 3	Psmd3	biological regulation;catabolic process;cellular catabolic process;cellular macromolecule catabolic process;cellular macromolecule metabolic process;cellular metabolic process;cellular process;macromolecule catabolic process;macromolecule metabolic process;metabolic process;modification-dependent macromolecule catabolic process;modification-dependent protein catabolic process;primary metabolic pr…	enzyme regulator activity	cell part;cytoplasm;extracellular membrane-bounded organelle;extracellular organelle;extracellular region part;extracellular vesicular exosome;intracellular membrane-bounded organelle;intracellular organelle;intracellular organelle part;intracellular part;macromolecular complex;membrane;membrane-bounded organelle;membrane-bounded vesicle;nuclear part;nucleoplasm;nucleus;organelle;organelle part;p…	Proteasome	14	14	14	29.2	29.2	29.2	60.718	39.246	463730000	56	2	8	8	5	8	12	8	10	12	2	5	8	8	5	8	12	8	10	12	2	5	8	8	5	8	12	8	10	12	2	5	56619000
P14733	P14733	Lamin-B1	Lmnb1	biological regulation;positive regulation of biological process;positive regulation of catalytic activity;positive regulation of cell communication;positive regulation of cell cycle;positive regulation of cellular process;positive regulation of cyclin-dependent protein kinase activity;positive regulation of cyclin-dependent protein kinase activity involved in G2/M;positive regulation of intracell…	binding;enzyme binding;JUN kinase binding;kinase binding;phospholipase binding;protein binding;protein kinase binding;structural molecule activity	cell part;cytoskeletal part;envelope;intermediate filament;intracellular membrane-bounded organelle;intracellular organelle;intracellular organelle part;intracellular part;lamin filament;macromolecular complex;membrane;membrane-bounded organelle;nuclear envelope;nuclear inner membrane;nuclear matrix;nuclear membrane;nuclear part;nucleoplasm;nucleus;organelle;organelle envelope;organelle inner mem…		13	11	11	23.8	22.3	22.3	66.785	56.793	317170000	51	1	2	6	2	6	3	9	11	7	9	4	1	5	1	5	1	7	9	6	7	3	1	5	1	5	1	7	9	6	7	3	11254000
P14824;F8WIT2	P14824;F8WIT2	Annexin A6;Annexin	Anxa6	biological regulation;calcium ion homeostasis;calcium ion transport;cation homeostasis;cation transport;cellular calcium ion homeostasis;cellular cation homeostasis;cellular chemical homeostasis;cellular component assembly;cellular component organization;cellular component organization or biogenesis;cellular divalent inorganic cation homeostasis;cellular homeostasis;cellular ion homeostasis;cellu…	binding;calcium ion binding;calcium-dependent phospholipid binding;calcium-dependent protein binding;cation binding;channel activity;cholesterol binding;gated channel activity;GTP binding;guanyl nucleotide binding;guanyl ribonucleotide binding;identical protein binding;ion binding;ion channel activity;ion transmembrane transporter activity;ligand-gated channel activity;ligand-gated ion channel ac…	adherens junction;anchoring junction;cell junction;cell part;cell-substrate adherens junction;cell-substrate junction;cytoplasmic membrane-bounded vesicle;cytoplasmic part;cytoplasmic vesicle;cytosol;endosomal part;endosome membrane;extracellular membrane-bounded organelle;extracellular organelle;extracellular region part;extracellular vesicular exosome;focal adhesion;intracellular membrane-bound…		38	38	37	58.5	58.5	58.5	75.884	323.31	13126000000	3091	2	35	34	32	31	34	34	33	36	30	30	35	34	32	31	34	34	33	36	30	30	34	33	31	30	33	33	32	35	30	29	1529600000
Q5M8R8;P14869;E9Q070;S4R1N1;D3YVM5	Q5M8R8;P14869;E9Q070;S4R1N1;D3YVM5	60S acidic ribosomal protein P0	Rplp0;Gm8730	cellular component biogenesis;cellular component biogenesis at cellular level;cellular component organization or biogenesis;cellular component organization or biogenesis at cellular level;cellular process;cellular response to chemical stimulus;cellular response to cytokine stimulus;cellular response to interleukin-4;cellular response to organic substance;cellular response to stimulus;response to …		adherens junction;anchoring junction;cell junction;cell part;cell projection;cell-substrate adherens junction;cell-substrate junction;cytoplasm;cytoplasmic part;cytosolic large ribosomal subunit;dendrite;extracellular membrane-bounded organelle;extracellular organelle;extracellular region part;extracellular vesicular exosome;focal adhesion;intracellular membrane-bounded organelle;intracellular no…	Ribosome	9	9	9	38.5	38.5	38.5	34.216	135.26	3378800000	643	5	8	8	8	9	8	8	9	9	9	9	8	8	8	9	8	8	9	9	9	9	8	8	8	9	8	8	9	9	9	9	232500000
P15105;D3YVK1;D3Z121	P15105	Glutamine synthetase	Glul	amine biosynthetic process;amine metabolic process;biological regulation;biosynthetic process;carboxylic acid biosynthetic process;carboxylic acid metabolic process;cell communication;cell proliferation;cellular amine metabolic process;cellular amino acid biosynthetic process;cellular amino acid metabolic process;cellular biosynthetic process;cellular component assembly;cellular component organiz…	acid-ammonia (or amide) ligase activity;adenyl nucleotide binding;adenyl ribonucleotide binding;amine binding;amino acid binding;ammonia ligase activity;ATP binding;binding;carbon-carbon lyase activity;carboxylic acid binding;carboxy-lyase activity;catalytic activity;cation binding;glutamate binding;glutamate decarboxylase activity;glutamate-ammonia ligase activity;identical protein binding;ion b…	axon part;axon terminus;cell body;cell part;cell projection part;cytoplasm;cytoplasmic part;endoplasmic reticulum;extracellular membrane-bounded organelle;extracellular organelle;extracellular region part;extracellular vesicular exosome;intracellular membrane-bounded organelle;intracellular organelle;intracellular part;macromolecular complex;membrane-bounded organelle;membrane-bounded vesicle;mit…	Alanine, aspartate and glutamate metabolism;Arginine and proline metabolism;Nitrogen metabolism;Two-component system	13	13	13	45	45	45	42.119	82.935	8583900000	436	3	8	7	8	10	11	9	9	9	7	9	8	7	8	10	11	9	9	9	7	9	8	7	8	10	11	9	9	9	7	9	962870000
Q5NC81;P15532;Q5NC80	Q5NC81;P15532;Q5NC80	Nucleoside diphosphate kinase;Nucleoside diphosphate kinase A	Nme1	anatomical structure development;biological regulation;biosynthetic process;body fluid secretion;catabolic process;cell differentiation;cellular biosynthetic process;cellular catabolic process;cellular component organization;cellular component organization or biogenesis;cellular developmental process;cellular macromolecule catabolic process;cellular macromolecule metabolic process;cellular membra…	adenyl nucleotide binding;adenyl ribonucleotide binding;ATP binding;binding;catalytic activity;cation binding;deoxyribonuclease activity;GTP binding;guanyl nucleotide binding;guanyl ribonucleotide binding;hydrolase activity;hydrolase activity, acting on ester bonds;identical protein binding;ion binding;kinase activity;magnesium ion binding;metal ion binding;nuclease activity;nucleobase-containing…	cell part;cell projection membrane;cell projection part;cytoplasmic part;cytosol;extracellular membrane-bounded organelle;extracellular organelle;extracellular region part;extracellular vesicular exosome;intracellular membrane-bounded organelle;intracellular organelle;intracellular part;leading edge membrane;membrane;membrane part;membrane-bounded organelle;membrane-bounded vesicle;mitochondrion;…	Purine metabolism;Pyrimidine metabolism	12	2	2	77.6	16.4	16.4	17.208	2.7765	184940000	25	3	7	7	6	7	10	6	9	10	8	8	1	2	1	1	2	1	2	2	2	2	1	2	1	1	2	1	2	2	2	2	1648100
P15626;D3YX76;Q8R5I6;F6Y363;A2AE91	P15626;D3YX76	Glutathione S-transferase Mu 2	Gstm2	amine metabolic process;benzene-containing compound metabolic process;carboxylic acid metabolic process;catabolic process;cellular amine metabolic process;cellular amino acid metabolic process;cellular aromatic compound metabolic process;cellular catabolic process;cellular detoxification of nitrogen compound;cellular ketone metabolic process;cellular metabolic process;cellular modified amino acid…	amine binding;amino acid binding;binding;carboxylic acid binding;catalytic activity;enzyme binding;glutathione binding;glutathione transferase activity;identical protein binding;modified amino acid binding;peptide binding;protein binding;protein dimerization activity;protein heterodimerization activity;protein homodimerization activity;transferase activity;transferase activity, transferring alkyl…	cell part;cytoplasm;cytoplasmic part;cytosol;intracellular part	Drug metabolism - cytochrome P450;Glutathione metabolism;Metabolism of xenobiotics by cytochrome P450	14	8	7	62.8	38.5	33.9	25.716	36.297	298160000	69	5	7	9	10	9	10	9	7	14	13	12	3	4	4	4	5	4	2	8	7	6	3	4	4	4	5	4	2	7	6	5	15734000
P16015	P16015	Carbonic anhydrase 3	Ca3	cellular metabolic process;cellular process;metabolic process;one-carbon metabolic process;response to chemical stimulus;response to ethanol;response to organic substance;response to oxidative stress;response to stimulus;response to stress;small molecule metabolic process	binding;carbonate dehydratase activity;carbon-oxygen lyase activity;catalytic activity;cation binding;hydro-lyase activity;ion binding;lyase activity;metal ion binding;nickel ion binding;transition metal ion binding;zinc ion binding	cell part;cytoplasmic part;cytosol;intracellular part	Nitrogen metabolism	20	20	20	86.5	86.5	86.5	29.366	323.31	13138000000	2146	1	11	15	14	15	11	12	12	17	13	15	11	15	14	15	11	12	12	17	13	15	11	15	14	15	11	12	12	17	13	15	748560000
P16045	P16045	Galectin-1	Lgals1	apoptosis;B cell activation;B cell activation involved in immune response;B cell differentiation;biological adhesion;biological regulation;carbohydrate homeostasis;cell activation;cell activation involved in immune response;cell adhesion;cell death;cell differentiation;cell-cell adhesion;cellular chemical homeostasis;cellular developmental process;cellular glucose homeostasis;cellular homeostasis…	binding;carbohydrate binding;disaccharide binding;galactose binding;galactoside binding;lactose binding;molecular transducer activity;monosaccharide binding;signal transducer activity;sugar binding	cell part;cell surface;cytoplasm;extracellular matrix;extracellular membrane-bounded organelle;extracellular organelle;extracellular region part;extracellular space;extracellular vesicular exosome;intracellular;intracellular membrane-bounded organelle;intracellular organelle;intracellular part;membrane-bounded organelle;membrane-bounded vesicle;nucleus;organelle;proteinaceous extracellular matrix…		2	2	2	14.8	14.8	14.8	14.866	2.5217	44249000	7	1	1	2	2	2	1	0	2	2	0	2	1	2	2	2	1	0	2	2	0	2	1	2	2	2	1	0	2	2	0	2	2559100
P16331;D3Z270;F6YTR5;D3YZ73	P16331	Phenylalanine-4-hydroxylase	Pah	amine catabolic process;amine metabolic process;aromatic amino acid family catabolic process;aromatic amino acid family metabolic process;aromatic compound catabolic process;carboxylic acid catabolic process;carboxylic acid metabolic process;catabolic process;cellular amine metabolic process;cellular amino acid catabolic process;cellular amino acid metabolic process;cellular aromatic compound met…	amine binding;amino acid binding;binding;carboxylic acid binding;catalytic activity;cation binding;ion binding;iron ion binding;metal ion binding;monooxygenase activity;oxidoreductase activity;oxidoreductase activity, acting on paired donors, with incorporation or reduction of molecular oxygen;oxidoreductase activity, acting on paired donors, with incorporation or reduction of molecular oxygen, r…	extracellular membrane-bounded organelle;extracellular organelle;extracellular region part;extracellular vesicular exosome;membrane-bounded organelle;membrane-bounded vesicle;organelle;vesicle	Phenylalanine metabolism;Phenylalanine, tyrosine and tryptophan biosynthesis	32	32	32	79.9	79.9	79.9	51.899	323.31	8574100000	1576	4	18	22	20	24	23	19	21	29	24	24	18	22	20	24	23	19	21	29	24	24	18	22	20	24	23	19	21	29	24	24	514440000
P16332	P16332	Methylmalonyl-CoA mutase, mitochondrial	Mut	amine metabolic process;carboxylic acid metabolic process;cellular amine metabolic process;cellular amino acid metabolic process;cellular ketone metabolic process;cellular metabolic process;cellular nitrogen compound metabolic process;cellular process;developmental process;homocysteine metabolic process;metabolic process;nitrogen compound metabolic process;organic acid metabolic process;oxoacid m…	amine binding;amino acid binding;binding;carboxylic acid binding;catalytic activity;cation binding;cobalamin binding;intramolecular transferase activity;ion binding;isomerase activity;metal ion binding;methylmalonyl-CoA mutase activity;modified amino acid binding;tetrapyrrole binding;vitamin binding	cell part;cytoplasmic part;intracellular membrane-bounded organelle;intracellular organelle;intracellular organelle lumen;intracellular organelle part;intracellular part;membrane-bounded organelle;membrane-enclosed lumen;mitochondrial matrix;mitochondrial part;mitochondrion;organelle;organelle lumen;organelle part	Carbon fixation pathways in prokaryotes;Glyoxylate and dicarboxylate metabolism;Propanoate metabolism;Valine, leucine and isoleucine degradation	13	13	13	26.7	26.7	26.7	82.843	44.031	314750000	71	1	4	5	3	3	3	3	3	13	6	10	4	5	3	3	3	3	3	13	6	10	4	5	3	3	3	3	3	13	6	10	10174000
Q52JJ6;P16406;F7B9G4;F6YHW2	Q52JJ6;P16406;F7B9G4	Glutamyl aminopeptidase	Enpep	anatomical structure development;anatomical structure formation involved in morphogenesis;angiogenesis;biological regulation;cell migration;cell motility;cell proliferation;cellular component movement;cellular process;developmental process;endocrine process;glomerulus development;locomotion;multicellular organismal process;regulation of biological quality;regulation of blood pressure;regulation o…	aminopeptidase activity;binding;catalytic activity;cation binding;exopeptidase activity;hydrolase activity;ion binding;metal ion binding;metalloaminopeptidase activity;metalloexopeptidase activity;metallopeptidase activity;peptidase activity;peptidase activity, acting on L-amino acid peptides;transition metal ion binding;zinc ion binding	apical part of cell;apical plasma membrane;brush border;cell part;cell projection;cytoplasmic part;cytoplasmic vesicle;external side of plasma membrane;extracellular membrane-bounded organelle;extracellular organelle;extracellular region part;extracellular vesicular exosome;integral to membrane;intracellular organelle;intracellular organelle part;intracellular part;intrinsic to membrane;lysosomal…	Renin-angiotensin system	10	10	10	11	11	11	107.96	54.408	614970000	119	4	8	9	6	6	9	7	8	4	8	5	8	9	6	6	9	7	8	4	8	5	8	9	6	6	9	7	8	4	8	5	115300000
Q3UJ34;P16460;J3QNG0	Q3UJ34;P16460;J3QNG0	Argininosuccinate synthase	Ass1;Gm5424	amide biosynthetic process;amine biosynthetic process;amine metabolic process;arginine biosynthetic process;arginine metabolic process;argininosuccinate metabolic process;aspartate family amino acid metabolic process;aspartate metabolic process;biological regulation;biosynthetic process;carboxylic acid biosynthetic process;carboxylic acid metabolic process;cellular amide metabolic process;cellula…	adenyl nucleotide binding;adenyl ribonucleotide binding;amine binding;amino acid binding;argininosuccinate synthase activity;ATP binding;binding;carboxylic acid binding;catalytic activity;identical protein binding;ligase activity;ligase activity, forming carbon-nitrogen bonds;nucleotide binding;protein binding;purine nucleotide binding;purine ribonucleoside triphosphate binding;purine ribonucleot…	cell part;cytoplasm;cytoplasmic part;extracellular membrane-bounded organelle;extracellular organelle;extracellular region part;extracellular vesicular exosome;intracellular membrane-bounded organelle;intracellular organelle;intracellular part;membrane-bounded organelle;membrane-bounded vesicle;mitochondrion;myelin sheath;organelle;vesicle	Alanine, aspartate and glutamate metabolism;Arginine and proline metabolism	33	33	33	76.7	76.7	76.7	46.584	323.31	98018000000	7659	3	22	24	24	24	27	23	22	29	29	30	22	24	24	24	27	23	22	29	29	30	22	24	24	24	27	23	22	29	29	30	7628400000
P16546;A3KGU5;A3KGU7;E9Q447;A3KGU9;A3KGU4	P16546;A3KGU5;A3KGU7;E9Q447;A3KGU9	Spectrin alpha chain, non-erythrocytic 1	Sptan1	actin filament capping;biological regulation;cellular component organization;cellular component organization or biogenesis;negative regulation of actin filament depolymerization;negative regulation of actin filament polymerization;negative regulation of biological process;negative regulation of cellular component organization;negative regulation of cellular process;negative regulation of cytoskel…	binding;calcium ion binding;cation binding;cytoskeletal protein binding;ion binding;metal ion binding;protein binding;protein dimerization activity;protein heterodimerization activity;spectrin binding	adherens junction;anchoring junction;axon part;cell cortex part;cell junction;cell part;cell projection part;cell-cell adherens junction;cell-cell junction;contractile fiber part;cortical cytoskeleton;cuticular plate;cytoplasmic part;cytoskeletal part;cytoskeleton;extracellular membrane-bounded organelle;extracellular organelle;extracellular region part;extracellular vesicular exosome;fascia adhe…		39	39	39	20.1	20.1	20.1	284.59	203.49	1818400000	302	6	9	20	15	13	22	25	31	30	25	21	9	20	15	13	22	25	31	30	25	21	9	20	15	13	22	25	31	30	25	21	32597000
P17047	P17047	Lysosome-associated membrane glycoprotein 2	Lamp2	biological regulation;posttranscriptional regulation of gene expression;protein stabilization;regulation of biological process;regulation of biological quality;regulation of gene expression;regulation of macromolecule metabolic process;regulation of metabolic process;regulation of protein stability	binding;enzyme binding;protein binding;protein domain specific binding	cell part;cytoplasmic part;cytoplasmic vesicle membrane;cytoplasmic vesicle part;endocytic vesicle membrane;endosomal part;endosome;endosome membrane;extracellular membrane-bounded organelle;extracellular organelle;extracellular region part;extracellular vesicular exosome;integral to membrane;intracellular membrane-bounded organelle;intracellular organelle;intracellular organelle part;intracellul…	ko05152;Lysosome;Phagosome	5	5	5	10.6	10.6	10.6	45.681	11.913	1725300000	401	1	4	4	4	5	4	4	4	5	5	5	4	4	4	5	4	4	4	5	5	5	4	4	4	5	4	4	4	5	5	5	183180000
[truncated: 758 more rows]
[truncated: 19 more columns]
