# Supplementary material for: Re-Adaption on Earth after Spaceflights Affects the Mouse Liver Proteome
Source: Int J Mol Sci. 2017 Aug 12;18(8):1763. doi: 10.3390/ijms18081763 (PMC5578152; doi:10.3390/ijms18081763)
Supplement: Supplementary file 1 [file ijms-18-01763-s001.zip › Table S4.xlsx]

## Sheet: cluster_A_enrichment
Cluster ID	Type	Name	P value	Enrichment	Total	In cluster	Cluster size	Benj. Hoch. FDR
438	GOCC name	ribonucleoprotein complex	1.6219e-14	1.9169	55	52	218	1.8976e-12
438	KEGG name	Ribosome	1.6994e-11	1.9742	38	37	218	3.1269e-09
438	GOBP name	cellular amino acid metabolic process	2.2294e-12	1.8213	59	53	218	7.785e-09
438	GOBP name	cellular nitrogen compound metabolic process	1.0709e-11	1.5381	116	88	218	1.8697e-08
438	GOMF name	structural constituent of ribosome	3.6821e-11	1.9727	37	36	218	3.3691e-08
438	GOBP name	nitrogen compound metabolic process	3.2888e-11	1.5164	119	89	218	3.8281e-08
438	GOCC name	mitochondrial matrix	1.6857e-09	1.9149	36	34	218	9.8616e-08
438	GOBP name	cellular amine metabolic process	6.5585e-10	1.7057	63	53	218	5.7256e-07
438	GOBP name	translation	1.6857e-09	1.9149	36	34	218	9.8111e-07
438	GOBP name	macromolecule biosynthetic process	1.4082e-09	1.7597	53	46	218	9.8351e-07
438	GOBP name	amine metabolic process	2.1546e-09	1.679	64	53	218	1.0748e-06
438	GOBP name	cellular macromolecule biosynthetic process	2.7553e-09	1.7546	52	45	218	1.2027e-06
438	GOMF name	structural molecule activity	3.7768e-09	1.8344	42	38	218	1.7279e-06
438	GOBP name	cellular metabolic process	2.3078e-08	1.1952	285	168	218	8.9544e-06
438	GOBP name	cellular biosynthetic process	6.9476e-08	1.4062	124	86	218	2.4261e-05
438	GOCC name	large ribosomal subunit	9.7126e-07	2.0275	19	19	218	3.4965e-05
438	GOCC name	cytosolic large ribosomal subunit	9.7126e-07	2.0275	19	19	218	3.7879e-05
438	GOBP name	biosynthetic process	1.8072e-07	1.3775	131	89	218	5.7371e-05
438	GOMF name	nucleic acid binding	4.3591e-07	1.6824	47	39	218	9.9714e-05
438	GOMF name	RNA binding	3.5884e-07	1.8374	32	29	218	0.00010945
438	GOBP name	coenzyme metabolic process	7.0346e-07	1.8313	31	28	218	0.00018896
438	GOBP name	primary metabolic process	6.8362e-07	1.1904	264	155	218	0.00019893
438	GOCC name	non-membrane-bounded organelle	6.6156e-06	1.472	73	53	218	0.00020641
438	GOCC name	intracellular non-membrane-bounded organelle	6.6156e-06	1.472	73	53	218	0.00022115
438	GOBP name	cellular amino acid catabolic process	5.1028e-06	1.8103	28	25	218	0.0012728
438	GOBP name	metabolic process	6.2113e-06	1.1264	324	180	218	0.001446
438	GOCC name	small ribosomal subunit	8.2075e-05	1.9083	17	16	218	0.0020216
438	GOCC name	cytoplasm	0.00010287	1.2531	144	89	218	0.0022925
438	GOMF name	vitamin binding	2.0668e-05	1.9208	19	18	218	0.0023639
438	GOCC name	nucleolus	0.00014845	1.6101	34	27	218	0.0028949
438	GOCC name	mitochondrion	0.00015683	1.1991	186	110	218	0.0029358
438	GOBP name	small molecule catabolic process	1.5674e-05	1.5121	59	44	218	0.003421
438	GOBP name	cellular amino acid biosynthetic process	2.0668e-05	1.9208	19	18	218	0.0040097
438	GOBP name	amine catabolic process	1.9749e-05	1.7479	29	25	218	0.0040566
438	GOCC name	nuclear part	0.00025801	1.3223	92	60	218	0.0046442
438	GOCC name	nucleus	0.00033798	1.2739	113	71	218	0.0054543
438	GOCC name	cytosolic small ribosomal subunit	0.0003181	1.8924	15	14	218	0.0055137
438	GOBP name	cofactor metabolic process	3.2517e-05	1.6697	34	28	218	0.0059763
438	GOBP name	protein homotetramerization	4.052e-05	2.0275	14	14	218	0.0067379
438	KEGG name	Valine, leucine and isoleucine degradation	0.00012026	1.7631	23	20	218	0.0073761
438	KEGG name	Citrate cycle (TCA cycle)	0.0001621	1.9008	16	15	218	0.0074568
438	GOMF name	cofactor binding	8.6309e-05	1.492	53	39	218	0.0078972
438	GOBP name	catabolic process	5.1355e-05	1.3109	116	75	218	0.0081514
438	GOBP name	cellular catabolic process	5.6739e-05	1.3264	107	70	218	0.0086145
438	GOCC name	nucleoplasm	0.00072164	1.4836	41	30	218	0.011258
438	GOBP name	acetyl-CoA metabolic process	8.2075e-05	1.9083	17	16	218	0.011942
438	GOBP name	organic acid metabolic process	0.00011599	1.2691	131	82	218	0.015578
438	KEGG name	Glycine, serine and threonine metabolism	0.00076542	2.0275	10	10	218	0.015649
438	GOCC name	chromosomal part	0.0011987	1.8716	13	12	218	0.016499
438	KEGG name	Propanoate metabolism	0.00072129	1.789	17	15	218	0.01659
438	GOBP name	organic acid catabolic process	0.0001413	1.5099	47	35	218	0.017622
438	GOBP name	glutamine family amino acid metabolic process	0.0001621	1.9008	16	15	218	0.01826
438	GOBP name	carboxylic acid catabolic process	0.0001413	1.5099	47	35	218	0.018275
438	GOBP name	oxoacid metabolic process	0.00015835	1.2672	128	80	218	0.018432
438	KEGG name	Arginine and proline metabolism	0.00072129	1.789	17	15	218	0.01896
438	GOBP name	carboxylic acid metabolic process	0.00015835	1.2672	128	80	218	0.019068
438	GOBP name	nucleobase-containing compound metabolic process	0.0001812	1.4292	61	43	218	0.019175
438	GOCC name	intracellular part	0.0017269	1.0331	420	214	218	0.020205
438	GOCC name	organelle lumen	0.0019879	1.364	55	37	218	0.022691
438	GOBP name	cellular macromolecule metabolic process	0.0002391	1.2805	114	72	218	0.023856
438	GOBP name	cellular ketone metabolic process	0.00023367	1.2574	129	80	218	0.023999
438	GOBP name	RNA processing	0.0003181	1.8924	15	14	218	0.030022
438	GOCC name	intracellular organelle lumen	0.002851	1.3517	54	36	218	0.031029
438	GOBP name	small molecule metabolic process	0.00038096	1.2019	167	99	218	0.033258
438	KEGG name	Alanine, aspartate and glutamate metabolism	0.0022984	1.8586	12	11	218	0.035243
438	GOBP name	macromolecule metabolic process	0.00043827	1.249	125	77	218	0.037328

## Sheet: cluster_A_enrichment_members
Protein IDs	Majority protein IDs	Protein names	Gene names	GOBP name	GOCC name	GOMF name	KEGG name
A0A087WS46;O70251;M0QWK5;M0QWH8;G3UX43;G3UZ47	A0A087WS46;O70251	Elongation factor 1-beta	Eef1b2;Eef1b	biosynthetic process;cellular biosynthetic process;cellular macromolecule biosynthetic process;cellular macromolecule metabolic process;cellular metabolic process;macromolecule biosynthetic process;macromolecule metabolic process;metabolic process	cytoplasm;intracellular part	nucleic acid binding;RNA binding
A0A0A0MQ68;Q60759;D3Z4I2	A0A0A0MQ68;Q60759	Glutaryl-CoA dehydrogenase, mitochondrial	Gcdh	amine metabolic process;biosynthetic process;carboxylic acid metabolic process;cellular amine metabolic process;cellular amino acid metabolic process;cellular biosynthetic process;cellular ketone metabolic process;cellular metabolic process;cellular nitrogen compound metabolic process;coenzyme metabolic process;cofactor metabolic process;metabolic process;nitrogen compound metabolic process;organ…	intracellular organelle lumen;intracellular part;mitochondrial matrix;mitochondrion;organelle lumen	cofactor binding
Q5M9K9;A0A0A6YX26;P62900;A0A0A6YXL3	Q5M9K9;A0A0A6YX26;P62900;A0A0A6YXL3	60S ribosomal protein L31	Rpl31	biosynthetic process;cellular biosynthetic process;cellular macromolecule biosynthetic process;cellular macromolecule metabolic process;cellular metabolic process;macromolecule biosynthetic process;macromolecule metabolic process;metabolic process;primary metabolic process;translation	cytosolic large ribosomal subunit;intracellular part;large ribosomal subunit;ribonucleoprotein complex	structural constituent of ribosome;structural molecule activity	Ribosome
A0A0R4J023;Q9JLZ3;F6RT60;F6R307;A0A0R4J1L8;E9Q6L3;E9QMT1	A0A0R4J023;Q9JLZ3;F6RT60;F6R307	Methylglutaconyl-CoA hydratase, mitochondrial	Auh	amine catabolic process;amine metabolic process;carboxylic acid catabolic process;carboxylic acid metabolic process;catabolic process;cellular amine metabolic process;cellular amino acid catabolic process;cellular amino acid metabolic process;cellular catabolic process;cellular ketone metabolic process;cellular macromolecule metabolic process;cellular metabolic process;cellular nitrogen compound …	intracellular part;mitochondrion	nucleic acid binding;RNA binding	Valine, leucine and isoleucine degradation
A0A0R4J083;P51174	A0A0R4J083;P51174	Long-chain specific acyl-CoA dehydrogenase, mitochondrial	Acadl	amine catabolic process;amine metabolic process;carboxylic acid catabolic process;carboxylic acid metabolic process;catabolic process;cellular amine metabolic process;cellular amino acid catabolic process;cellular amino acid metabolic process;cellular catabolic process;cellular ketone metabolic process;cellular metabolic process;cellular nitrogen compound metabolic process;metabolic process;nitro…	cytoplasm;intracellular organelle lumen;intracellular part;mitochondrial matrix;mitochondrion;organelle lumen	cofactor binding
E9QN08;A0A0R4J1L2;Q91VK2;Q80T06;P57776;F6ZFU0;A0A0R4J1E2;D3Z7N2;D3YUQ9;D3YZT9;D3YY68	E9QN08;A0A0R4J1L2;Q91VK2;Q80T06;P57776;F6ZFU0;A0A0R4J1E2;D3Z7N2;D3YUQ9;D3YZT9;D3YY68	Elongation factor 1-delta	Eef1d	biosynthetic process;cellular biosynthetic process;cellular macromolecule biosynthetic process;cellular macromolecule metabolic process;cellular metabolic process;cellular nitrogen compound metabolic process;macromolecule biosynthetic process;macromolecule metabolic process;metabolic process;nitrogen compound metabolic process;nucleobase-containing compound metabolic process;primary metabolic pro…	cytoplasm;intracellular non-membrane-bounded organelle;intracellular part;non-membrane-bounded organelle;nuclear part;nucleolus;nucleus	nucleic acid binding;RNA binding
Q6ZWZ4;A0A140T8K6;P47964	Q6ZWZ4;A0A140T8K6	60S ribosomal protein L36	Rpl36	biosynthetic process;cellular biosynthetic process;cellular macromolecule biosynthetic process;cellular macromolecule metabolic process;cellular metabolic process;macromolecule biosynthetic process;macromolecule metabolic process;metabolic process;primary metabolic process;translation	cytosolic large ribosomal subunit;intracellular non-membrane-bounded organelle;intracellular part;large ribosomal subunit;non-membrane-bounded organelle;nuclear part;nucleolus;ribonucleoprotein complex	structural constituent of ribosome;structural molecule activity	Ribosome
Q5M9M5;A0A140T8M7;P62751;D3YTY6	Q5M9M5;A0A140T8M7;P62751	60S ribosomal protein L23a	Rpl23a	biosynthetic process;cellular biosynthetic process;cellular macromolecule biosynthetic process;cellular macromolecule metabolic process;cellular metabolic process;macromolecule biosynthetic process;macromolecule metabolic process;metabolic process;primary metabolic process;translation	intracellular non-membrane-bounded organelle;intracellular part;non-membrane-bounded organelle;nucleus;ribonucleoprotein complex	nucleic acid binding;RNA binding;structural constituent of ribosome;structural molecule activity	Ribosome
A2ATU0	A2ATU0	Probable 2-oxoglutarate dehydrogenase E1 component DHKTD1, mitochondrial	Dhtkd1	acetyl-CoA metabolic process;catabolic process;cellular catabolic process;cellular metabolic process;coenzyme metabolic process;cofactor metabolic process;metabolic process;primary metabolic process;small molecule catabolic process;small molecule metabolic process	intracellular part;mitochondrion	cofactor binding;vitamin binding
A2AVJ7;Q99PL5	A2AVJ7;Q99PL5	Ribosome-binding protein 1	Rrbp1		intracellular part
A2RTT4;P61089	A2RTT4;P61089	Ubiquitin-conjugating enzyme E2 N	Ube2n	catabolic process;cellular catabolic process;cellular macromolecule metabolic process;cellular metabolic process;cellular nitrogen compound metabolic process;macromolecule metabolic process;metabolic process;nitrogen compound metabolic process;nucleobase-containing compound metabolic process;primary metabolic process	cytoplasm;intracellular part;nucleus
Q5FWB7;A6ZI44;P05064;Q9CPQ9;A6ZI46;A0A0U1RPN8;D3YWI1;D3Z510;D3YV98;A0A0U1RPT5;A6ZI47	Q5FWB7;A6ZI44;P05064;Q9CPQ9;A6ZI46;A0A0U1RPN8;D3YWI1	Fructose-bisphosphate aldolase;Fructose-bisphosphate aldolase A	Aldoa;Aldoart1	catabolic process;cellular metabolic process;metabolic process;primary metabolic process;protein homotetramerization;small molecule catabolic process;small molecule metabolic process	intracellular part;mitochondrion
B1AQR8;G3X9T7;O08573	B1AQR8;G3X9T7;O08573	Galectin;Galectin-9	Lgals9		cytoplasm;intracellular part
B2M1R6;P61979;H3BLL4;H3BK96;H3BKD0;H3BKI8;H3BJS9;H3BJ43;Q8BT23;H3BLP7	B2M1R6;P61979;H3BLL4;H3BK96;H3BKD0;H3BKI8	Heterogeneous nuclear ribonucleoprotein K	Hnrnpk	cellular macromolecule metabolic process;cellular metabolic process;cellular nitrogen compound metabolic process;macromolecule metabolic process;metabolic process;nitrogen compound metabolic process;nucleobase-containing compound metabolic process;primary metabolic process;RNA processing	chromosomal part;cytoplasm;intracellular non-membrane-bounded organelle;intracellular part;non-membrane-bounded organelle;nuclear part;nucleoplasm;ribonucleoprotein complex	nucleic acid binding;RNA binding
B2RS41;Q8BWF0	B2RS41;Q8BWF0	Succinate-semialdehyde dehydrogenase, mitochondrial	Aldh5a1	amine catabolic process;amine metabolic process;carboxylic acid catabolic process;carboxylic acid metabolic process;catabolic process;cellular amine metabolic process;cellular amino acid catabolic process;cellular amino acid metabolic process;cellular catabolic process;cellular ketone metabolic process;cellular metabolic process;cellular nitrogen compound metabolic process;glutamine family amino …	intracellular part;mitochondrion		Alanine, aspartate and glutamate metabolism
B2RVD5;B2RTK3;Q8CBB6;Q8CGP2;Q8CGP1;Q6ZWY9;Q64525;Q64478;Q64475;P10854;P10853;Q9D2U9;Q8CGP0;Q64524;P70696	B2RVD5;B2RTK3;Q8CBB6;Q8CGP2;Q8CGP1;Q6ZWY9;Q64525;Q64478;Q64475;P10854;P10853;Q9D2U9;Q8CGP0;Q64524;P70696	Histone H2B;Histone H2B type 1-P;Histone H2B type 1-K;Histone H2B type 1-C/E/G;Histone H2B type 2-B;Histone H2B type 1-H;Histone H2B type 1-B;Histone H2B type 1-M;Histone H2B type 1-F/J/L;Histone H2B type 3-A;Histone H2B type 3-B;Histone H2B type 2-E;Histone H2B type 1-A	Hist1h2bk;Hist1h2bm;Hist1h2br;Hist1h2bp;Hist1h2bc;Hist2h2bb;Hist1h2bh;Hist1h2bb;Hist1h2bf;Hist3h2ba;Hist3h2bb;Hist2h2be;Hist1h2ba	macromolecule metabolic process;metabolic process;primary metabolic process	chromosomal part;intracellular part;nuclear part;nucleoplasm;nucleus	nucleic acid binding
B2RTM0;P62806	B2RTM0;P62806	Histone H4	Hist2h4;Hist1h4a		chromosomal part;intracellular non-membrane-bounded organelle;intracellular part;non-membrane-bounded organelle;nuclear part;nucleoplasm	nucleic acid binding
B2RVP5;Q3THW5;P0C0S6;Q8R029;Q3UA95;G3UWL7	B2RVP5;Q3THW5;P0C0S6;Q8R029;Q3UA95	Histone H2A;Histone H2A.V;Histone H2A.Z	H2afv;H2afz		chromosomal part;intracellular part;nuclear part;nucleus	nucleic acid binding
B2RXM2;J3QNY1;A2AL12;Q8BG05;V9GX38	B2RXM2;J3QNY1;A2AL12;Q8BG05	Heterogeneous nuclear ribonucleoprotein A3	Gm6793;Gm9242;Hnrnpa3	cellular macromolecule metabolic process;cellular metabolic process;cellular nitrogen compound metabolic process;macromolecule metabolic process;metabolic process;nitrogen compound metabolic process;nucleobase-containing compound metabolic process;primary metabolic process;RNA processing	intracellular part;nuclear part;ribonucleoprotein complex	nucleic acid binding;RNA binding
B2RXW1;P35492;F8WH73	B2RXW1;P35492	Histidine ammonia-lyase	Hal	amine catabolic process;amine metabolic process;biosynthetic process;carboxylic acid catabolic process;carboxylic acid metabolic process;catabolic process;cellular amine metabolic process;cellular amino acid catabolic process;cellular amino acid metabolic process;cellular catabolic process;cellular ketone metabolic process;cellular metabolic process;cellular nitrogen compound metabolic process;gl…	cytoplasm;intracellular part
B9EHN0;Q02053;P31254	B9EHN0;Q02053	Ubiquitin-like modifier-activating enzyme 1	Uba1	catabolic process;cellular catabolic process;cellular macromolecule metabolic process;cellular metabolic process;macromolecule metabolic process;metabolic process;primary metabolic process	chromosomal part;cytoplasm;intracellular part;mitochondrion;nucleus
D3YYM6;Q91V55;P97461	D3YYM6;Q91V55;P97461	40S ribosomal protein S5;40S ribosomal protein S5, N-terminally processed	Rps5	biosynthetic process;cellular biosynthetic process;cellular macromolecule biosynthetic process;cellular macromolecule metabolic process;cellular metabolic process;macromolecule biosynthetic process;macromolecule metabolic process;metabolic process;primary metabolic process;translation	cytosolic small ribosomal subunit;intracellular part;ribonucleoprotein complex;small ribosomal subunit	nucleic acid binding;RNA binding;structural constituent of ribosome;structural molecule activity	Ribosome
D3YZ54;Q9QXE0;E9PWM4;E9Q0K0;E9Q7H7;E9Q9L4;D6RDE9	D3YZ54;Q9QXE0;E9PWM4	2-hydroxyacyl-CoA lyase 1	Hacl1	carboxylic acid catabolic process;carboxylic acid metabolic process;catabolic process;cellular catabolic process;cellular ketone metabolic process;cellular metabolic process;metabolic process;organic acid catabolic process;organic acid metabolic process;oxoacid metabolic process;primary metabolic process;small molecule catabolic process;small molecule metabolic process	intracellular part	cofactor binding;vitamin binding
E9Q3X0;Q9EQK5;D3Z2N7	E9Q3X0;Q9EQK5	Major vault protein	Mvp	macromolecule metabolic process;metabolic process;primary metabolic process	cytoplasm;intracellular non-membrane-bounded organelle;intracellular part;non-membrane-bounded organelle;nucleus;ribonucleoprotein complex
E9Q5B6;F6ZV59;G5E8G0;G3X9W0;Q60668;A0A0G2JFL4;F6SHF3;F6VQH5;D3YTQ3;Q9D3U4;Q9Z130	E9Q5B6;F6ZV59;G5E8G0;G3X9W0;Q60668	Heterogeneous nuclear ribonucleoprotein D0	Hnrnpd	biosynthetic process;cellular biosynthetic process;cellular macromolecule biosynthetic process;cellular macromolecule metabolic process;cellular metabolic process;cellular nitrogen compound metabolic process;macromolecule biosynthetic process;macromolecule metabolic process;metabolic process;nitrogen compound metabolic process;nucleobase-containing compound metabolic process;primary metabolic pro…	cytoplasm;intracellular part;nuclear part;nucleoplasm;nucleus;ribonucleoprotein complex	nucleic acid binding;RNA binding
E9QN99;A0A087WPF8;A0A087WQN8;A0A087WSR2;Q8VCR7;A0A087WRJ2;A0A087WP24	E9QN99;A0A087WPF8;A0A087WQN8;A0A087WSR2;Q8VCR7;A0A087WRJ2;A0A087WP24	Alpha/beta hydrolase domain-containing protein 14B	Abhd14b	metabolic process	cytoplasm;intracellular non-membrane-bounded organelle;intracellular part;non-membrane-bounded organelle;nuclear part;nucleolus;nucleus
G5E8R3;E9QPD7;Q05920	G5E8R3;E9QPD7;Q05920	Pyruvate carboxylase;Pyruvate carboxylase, mitochondrial	Pcx;Pc	biosynthetic process;carboxylic acid metabolic process;cellular biosynthetic process;cellular ketone metabolic process;cellular metabolic process;metabolic process;organic acid metabolic process;oxoacid metabolic process;primary metabolic process;small molecule metabolic process	cytoplasm;intracellular organelle lumen;intracellular part;mitochondrial matrix;mitochondrion;organelle lumen	nucleic acid binding;vitamin binding	Citrate cycle (TCA cycle)
F6SVV1;Q4FZE6;P62082	F6SVV1;Q4FZE6;P62082	40S ribosomal protein S7	Gm9493;Rps7	biosynthetic process;cellular biosynthetic process;cellular macromolecule biosynthetic process;cellular macromolecule metabolic process;cellular metabolic process;cellular nitrogen compound metabolic process;macromolecule biosynthetic process;macromolecule metabolic process;metabolic process;nitrogen compound metabolic process;nucleobase-containing compound metabolic process;primary metabolic pro…	cytoplasm;cytosolic small ribosomal subunit;intracellular non-membrane-bounded organelle;intracellular part;non-membrane-bounded organelle;nuclear part;nucleolus;nucleus;ribonucleoprotein complex;small ribosomal subunit	structural constituent of ribosome;structural molecule activity	Ribosome
F6YTZ4;Q58EU3;P25444;A0A140T8L5;D3YVC1;E9Q1N8;J3QMG5;D3YWJ3;D3Z536	F6YTZ4;Q58EU3;P25444;A0A140T8L5;D3YVC1;E9Q1N8;J3QMG5;D3YWJ3	40S ribosomal protein S2	Gm6576;Rps2;Gm18025;Gm5786	biosynthetic process;cellular biosynthetic process;cellular macromolecule biosynthetic process;cellular macromolecule metabolic process;cellular metabolic process;macromolecule biosynthetic process;macromolecule metabolic process;metabolic process;primary metabolic process;translation	cytoplasm;cytosolic small ribosomal subunit;intracellular part;nuclear part;nucleoplasm;nucleus;ribonucleoprotein complex;small ribosomal subunit	nucleic acid binding;RNA binding;structural constituent of ribosome;structural molecule activity	Ribosome
Q561N5;F6YVP7;P62270;S4R1N6;A0A140T8T3	Q561N5;F6YVP7;P62270;S4R1N6;A0A140T8T3	40S ribosomal protein S18	Rps18;Gm10260	biosynthetic process;cellular biosynthetic process;cellular macromolecule biosynthetic process;cellular macromolecule metabolic process;cellular metabolic process;macromolecule biosynthetic process;macromolecule metabolic process;metabolic process;primary metabolic process;translation	cytoplasm;cytosolic small ribosomal subunit;intracellular part;nucleus;ribonucleoprotein complex;small ribosomal subunit	nucleic acid binding;RNA binding;structural constituent of ribosome;structural molecule activity	Ribosome
Q9WUD0;G3X8Q9;P12791;A6H6J2	Q9WUD0;G3X8Q9;P12791	Cytochrome P450 2B10	Cyp2b10	carboxylic acid metabolic process;catabolic process;cellular catabolic process;cellular ketone metabolic process;cellular metabolic process;metabolic process;organic acid metabolic process;oxoacid metabolic process;primary metabolic process;small molecule metabolic process	cytoplasm;intracellular part
Q564E2;G5E8N5;P06151;D3Z736;D3YZQ9;D3YVR7;D3YZE4;Q548Z6;P00342;A0A0N4SVV8;D3Z7F0;P16125	Q564E2;G5E8N5;P06151;D3Z736;D3YZQ9	L-lactate dehydrogenase;L-lactate dehydrogenase A chain	Ldha	biosynthetic process;carboxylic acid metabolic process;cellular biosynthetic process;cellular ketone metabolic process;cellular metabolic process;cellular nitrogen compound metabolic process;coenzyme metabolic process;cofactor metabolic process;metabolic process;nitrogen compound metabolic process;nucleobase-containing compound metabolic process;organic acid metabolic process;oxoacid metabolic pr…	cytoplasm;intracellular part;mitochondrion;nucleus	cofactor binding	Propanoate metabolism
H3BKH6;Q9R0P3;H3BLJ9;H3BJL6;H3BJP2;H3BK43;H3BJC6;H3BL99	H3BKH6;Q9R0P3;H3BLJ9;H3BJL6;H3BJP2;H3BK43	S-formylglutathione hydrolase	Esd	catabolic process;cellular catabolic process;cellular metabolic process;metabolic process;small molecule catabolic process;small molecule metabolic process	cytoplasm;intracellular part;nuclear part;nucleoplasm
I7HLV2;Q6ZWV3;P86048;B7FAU6	I7HLV2;Q6ZWV3;P86048	60S ribosomal protein L10;60S ribosomal protein L10-like	Rpl10;Rpl10l	biosynthetic process;cellular biosynthetic process;cellular macromolecule biosynthetic process;cellular macromolecule metabolic process;cellular metabolic process;macromolecule biosynthetic process;macromolecule metabolic process;metabolic process;primary metabolic process;translation	cytosolic large ribosomal subunit;intracellular non-membrane-bounded organelle;intracellular part;large ribosomal subunit;non-membrane-bounded organelle;nucleus;ribonucleoprotein complex	structural constituent of ribosome;structural molecule activity	Ribosome
O09173	O09173	Homogentisate 1,2-dioxygenase	Hgd	amine catabolic process;amine metabolic process;carboxylic acid catabolic process;carboxylic acid metabolic process;catabolic process;cellular amine metabolic process;cellular amino acid catabolic process;cellular amino acid metabolic process;cellular catabolic process;cellular ketone metabolic process;cellular metabolic process;cellular nitrogen compound metabolic process;metabolic process;nitro…
O09174	O09174	Alpha-methylacyl-CoA racemase	Amacr	biosynthetic process;carboxylic acid metabolic process;catabolic process;cellular biosynthetic process;cellular catabolic process;cellular ketone metabolic process;cellular metabolic process;metabolic process;organic acid metabolic process;oxoacid metabolic process;primary metabolic process;small molecule metabolic process	cytoplasm;intracellular part;mitochondrion
O35423	O35423	Serine--pyruvate aminotransferase, mitochondrial	Agxt	amine catabolic process;amine metabolic process;biosynthetic process;carboxylic acid catabolic process;carboxylic acid metabolic process;catabolic process;cellular amine metabolic process;cellular amino acid biosynthetic process;cellular amino acid catabolic process;cellular amino acid metabolic process;cellular biosynthetic process;cellular catabolic process;cellular ketone metabolic process;cel…	intracellular organelle lumen;intracellular part;mitochondrial matrix;mitochondrion;organelle lumen	cofactor binding;vitamin binding	Alanine, aspartate and glutamate metabolism;Glycine, serine and threonine metabolism
Q6ZWX1;O55142	Q6ZWX1;O55142	60S ribosomal protein L35a	Rpl35a	biosynthetic process;cellular biosynthetic process;cellular macromolecule biosynthetic process;cellular macromolecule metabolic process;cellular metabolic process;cellular nitrogen compound metabolic process;macromolecule biosynthetic process;macromolecule metabolic process;metabolic process;nitrogen compound metabolic process;nucleobase-containing compound metabolic process;primary metabolic pro…	cytosolic large ribosomal subunit;intracellular part;large ribosomal subunit;mitochondrion;ribonucleoprotein complex	structural constituent of ribosome;structural molecule activity	Ribosome
Q3TS38;O70475;D3YXP9	Q3TS38;O70475	UDP-glucose 6-dehydrogenase	Ugdh	biosynthetic process;carboxylic acid metabolic process;cellular biosynthetic process;cellular ketone metabolic process;cellular metabolic process;metabolic process;organic acid metabolic process;oxoacid metabolic process;primary metabolic process;small molecule metabolic process	intracellular part;nuclear part;nucleoplasm	cofactor binding
O88844;A0A087WPT4;A0A087WRS9;D3YVY3;A0A087WRM4	O88844	Isocitrate dehydrogenase [NADP] cytoplasmic	Idh1	acetyl-CoA metabolic process;amine metabolic process;carboxylic acid metabolic process;catabolic process;cellular amine metabolic process;cellular amino acid metabolic process;cellular catabolic process;cellular ketone metabolic process;cellular metabolic process;cellular nitrogen compound metabolic process;coenzyme metabolic process;cofactor metabolic process;metabolic process;nitrogen compound …	cytoplasm;intracellular part;mitochondrion	cofactor binding	Citrate cycle (TCA cycle)
P05201;F7ALS6	P05201	Aspartate aminotransferase, cytoplasmic	Got1	amine catabolic process;amine metabolic process;biosynthetic process;carboxylic acid catabolic process;carboxylic acid metabolic process;catabolic process;cellular amine metabolic process;cellular amino acid biosynthetic process;cellular amino acid catabolic process;cellular amino acid metabolic process;cellular biosynthetic process;cellular catabolic process;cellular ketone metabolic process;cel…	cytoplasm;intracellular part;nucleus	cofactor binding;vitamin binding	Alanine, aspartate and glutamate metabolism;Arginine and proline metabolism
P05202	P05202	Aspartate aminotransferase, mitochondrial	Got2	amine catabolic process;amine metabolic process;biosynthetic process;carboxylic acid catabolic process;carboxylic acid metabolic process;catabolic process;cellular amine metabolic process;cellular amino acid biosynthetic process;cellular amino acid catabolic process;cellular amino acid metabolic process;cellular biosynthetic process;cellular catabolic process;cellular ketone metabolic process;cel…	intracellular organelle lumen;intracellular part;mitochondrial matrix;mitochondrion;organelle lumen	cofactor binding;vitamin binding	Alanine, aspartate and glutamate metabolism;Arginine and proline metabolism
Q546G4;P07724	Q546G4;P07724	Serum albumin	Alb		cytoplasm;intracellular part;nucleus	cofactor binding;nucleic acid binding;vitamin binding
P08228	P08228	Superoxide dismutase [Cu-Zn]	Sod1	amine metabolic process;biosynthetic process;carboxylic acid metabolic process;cellular amine metabolic process;cellular amino acid metabolic process;cellular biosynthetic process;cellular ketone metabolic process;cellular macromolecule metabolic process;cellular metabolic process;cellular nitrogen compound metabolic process;macromolecule metabolic process;metabolic process;nitrogen compound meta…	cytoplasm;intracellular part;mitochondrion;nuclear part;nucleoplasm;nucleus
P08249;A0A0G2JF23;A0A0G2JGY4	P08249	Malate dehydrogenase, mitochondrial	Mdh2	acetyl-CoA metabolic process;carboxylic acid metabolic process;catabolic process;cellular catabolic process;cellular ketone metabolic process;cellular macromolecule metabolic process;cellular metabolic process;cellular nitrogen compound metabolic process;coenzyme metabolic process;cofactor metabolic process;macromolecule metabolic process;metabolic process;nitrogen compound metabolic process;nucl…	intracellular organelle lumen;intracellular part;mitochondrial matrix;mitochondrion;nuclear part;nucleoplasm;nucleus;organelle lumen		Citrate cycle (TCA cycle)
P09405	P09405	Nucleolin	Ncl		intracellular non-membrane-bounded organelle;intracellular part;non-membrane-bounded organelle;nuclear part;nucleolus;nucleoplasm;nucleus;ribonucleoprotein complex	nucleic acid binding;RNA binding
Q4FJX9;P09671	Q4FJX9;P09671	Superoxide dismutase;Superoxide dismutase [Mn], mitochondrial	Sod2	amine metabolic process;biosynthetic process;carboxylic acid metabolic process;cellular amine metabolic process;cellular amino acid metabolic process;cellular biosynthetic process;cellular ketone metabolic process;cellular metabolic process;cellular nitrogen compound metabolic process;metabolic process;nitrogen compound metabolic process;organic acid metabolic process;oxoacid metabolic process;pr…	intracellular non-membrane-bounded organelle;intracellular part;mitochondrion;non-membrane-bounded organelle	nucleic acid binding
P10605	P10605	Cathepsin B;Cathepsin B light chain;Cathepsin B heavy chain	Ctsb	macromolecule metabolic process;metabolic process;primary metabolic process	intracellular non-membrane-bounded organelle;intracellular part;mitochondrion;non-membrane-bounded organelle;nuclear part;nucleolus
P10649;A2AE89	P10649;A2AE89	Glutathione S-transferase Mu 1	Gstm1	amine metabolic process;carboxylic acid metabolic process;cellular amine metabolic process;cellular amino acid metabolic process;cellular ketone metabolic process;cellular metabolic process;cellular nitrogen compound metabolic process;metabolic process;nitrogen compound metabolic process;organic acid metabolic process;oxoacid metabolic process;primary metabolic process;small molecule metabolic pr…	cytoplasm;intracellular part
P10922	P10922	Histone H1.0;Histone H1.0, N-terminally processed	H1f0		chromosomal part;intracellular non-membrane-bounded organelle;intracellular part;non-membrane-bounded organelle;nuclear part;nucleoplasm;nucleus	nucleic acid binding
P11352;A0A0A6YVV2;A0A0A6YY34	P11352;A0A0A6YVV2;A0A0A6YY34	Glutathione peroxidase 1;Glutathione peroxidase	Gpx1	amine metabolic process;carboxylic acid metabolic process;catabolic process;cellular amine metabolic process;cellular amino acid metabolic process;cellular catabolic process;cellular ketone metabolic process;cellular macromolecule metabolic process;cellular metabolic process;cellular nitrogen compound metabolic process;macromolecule metabolic process;metabolic process;nitrogen compound metabolic …	cytoplasm;intracellular part;mitochondrion;nucleus
Q71LX8;P11499;E9Q3D6;E9Q0C3;E9PX27;D3Z1R1	Q71LX8;P11499	Heat shock protein HSP 90-beta	Hsp90ab1	cellular macromolecule metabolic process;cellular metabolic process;macromolecule metabolic process;metabolic process;primary metabolic process	cytoplasm;intracellular part;mitochondrion;nuclear part	nucleic acid binding;RNA binding
Q543H3;P11725;Q8R1A8	Q543H3;P11725;Q8R1A8	Ornithine carbamoyltransferase, mitochondrial	Otc	amine catabolic process;amine metabolic process;biosynthetic process;carboxylic acid catabolic process;carboxylic acid metabolic process;catabolic process;cellular amine metabolic process;cellular amino acid biosynthetic process;cellular amino acid catabolic process;cellular amino acid metabolic process;cellular biosynthetic process;cellular catabolic process;cellular ketone metabolic process;cel…	intracellular organelle lumen;intracellular part;mitochondrial matrix;mitochondrion;organelle lumen		Arginine and proline metabolism
Q58ET1;P12970;A0A140T8L1;A0A140T8L3;F6VBB8;V9GX35	Q58ET1;P12970;A0A140T8L1;A0A140T8L3	60S ribosomal protein L7a	Rpl7a		cytoplasm;cytosolic large ribosomal subunit;intracellular non-membrane-bounded organelle;intracellular part;large ribosomal subunit;non-membrane-bounded organelle;nuclear part;nucleolus;nucleus;ribonucleoprotein complex		Ribosome
P14115	P14115	60S ribosomal protein L27a	Rpl27a	biosynthetic process;cellular biosynthetic process;cellular macromolecule biosynthetic process;cellular macromolecule metabolic process;cellular metabolic process;macromolecule biosynthetic process;macromolecule metabolic process;metabolic process;primary metabolic process;translation	cytosolic large ribosomal subunit;intracellular part;large ribosomal subunit;ribonucleoprotein complex	structural constituent of ribosome;structural molecule activity	Ribosome
Q5M9N8;P14148;F6XI62	Q5M9N8;P14148;F6XI62	60S ribosomal protein L7	Rpl7	biosynthetic process;cellular biosynthetic process;cellular macromolecule biosynthetic process;cellular macromolecule metabolic process;cellular metabolic process;cellular nitrogen compound metabolic process;macromolecule biosynthetic process;macromolecule metabolic process;metabolic process;nitrogen compound metabolic process;nucleobase-containing compound metabolic process;primary metabolic pro…	cytoplasm;cytosolic large ribosomal subunit;intracellular non-membrane-bounded organelle;intracellular part;large ribosomal subunit;non-membrane-bounded organelle;nuclear part;nucleolus;nucleus;ribonucleoprotein complex	nucleic acid binding;RNA binding;structural constituent of ribosome;structural molecule activity	Ribosome
P14206	P14206	40S ribosomal protein SA	Rpsa	biosynthetic process;cellular biosynthetic process;cellular macromolecule biosynthetic process;cellular macromolecule metabolic process;cellular metabolic process;cellular nitrogen compound metabolic process;macromolecule biosynthetic process;macromolecule metabolic process;metabolic process;nitrogen compound metabolic process;nucleobase-containing compound metabolic process;primary metabolic pro…	cytoplasm;cytosolic small ribosomal subunit;intracellular part;nucleus;ribonucleoprotein complex;small ribosomal subunit	structural constituent of ribosome;structural molecule activity	Ribosome
P16332	P16332	Methylmalonyl-CoA mutase, mitochondrial	Mut	amine metabolic process;carboxylic acid metabolic process;cellular amine metabolic process;cellular amino acid metabolic process;cellular ketone metabolic process;cellular metabolic process;cellular nitrogen compound metabolic process;metabolic process;nitrogen compound metabolic process;organic acid metabolic process;oxoacid metabolic process;primary metabolic process;small molecule metabolic pr…	intracellular organelle lumen;intracellular part;mitochondrial matrix;mitochondrion;organelle lumen	vitamin binding	Propanoate metabolism;Valine, leucine and isoleucine degradation
Q3UJ34;P16460;J3QNG0	Q3UJ34;P16460;J3QNG0	Argininosuccinate synthase	Ass1;Gm5424	amine metabolic process;biosynthetic process;carboxylic acid metabolic process;cellular amine metabolic process;cellular amino acid biosynthetic process;cellular amino acid metabolic process;cellular biosynthetic process;cellular ketone metabolic process;cellular metabolic process;cellular nitrogen compound metabolic process;glutamine family amino acid metabolic process;metabolic process;nitrogen…	cytoplasm;intracellular part;mitochondrion		Alanine, aspartate and glutamate metabolism;Arginine and proline metabolism
Q5FW97;P17182;Q6PHC1;B1ARR7;B0QZL1;A0A0N4SUX5;Q545V3;P17183;D3Z2S4;D3Z6E4;A0A0N4SUI6;B1ARR6;D3YVD3;J3QPZ9;A0A0N4SUW8;Q5SX61;Q5SX60	Q5FW97;P17182;Q6PHC1	Alpha-enolase	EG433182;Eno1	catabolic process;cellular metabolic process;metabolic process;primary metabolic process;small molecule catabolic process;small molecule metabolic process	cytoplasm;intracellular part
P17563;D6RHN2	P17563	Selenium-binding protein 1	Selenbp1		intracellular non-membrane-bounded organelle;intracellular part;non-membrane-bounded organelle;nuclear part;nucleolus
Q5SVY2;P17742;F8VPN3;V9GXC1;V9GX31	Q5SVY2;P17742	Peptidyl-prolyl cis-trans isomerase;Peptidyl-prolyl cis-trans isomerase A;Peptidyl-prolyl cis-trans isomerase A, N-terminally processed	Ppia	cellular macromolecule metabolic process;cellular metabolic process;macromolecule metabolic process;metabolic process;primary metabolic process	intracellular part;nucleus
Q543K9;P23492;Q9D8C9	Q543K9;P23492	Purine nucleoside phosphorylase	Pnp	biosynthetic process;catabolic process;cellular biosynthetic process;cellular catabolic process;cellular metabolic process;cellular nitrogen compound metabolic process;metabolic process;nitrogen compound metabolic process;nucleobase-containing compound metabolic process;organic acid metabolic process;primary metabolic process;small molecule metabolic process	cytoplasm;intracellular non-membrane-bounded organelle;intracellular part;non-membrane-bounded organelle
P26039;F6SX70;E9PUM4;Q71LX4	P26039	Talin-1	Tln1		cytoplasm;intracellular non-membrane-bounded organelle;intracellular part;non-membrane-bounded organelle	structural molecule activity
P26043;Q7TSG6	P26043;Q7TSG6	Radixin	Rdx		cytoplasm;intracellular non-membrane-bounded organelle;intracellular part;non-membrane-bounded organelle
P26443;F7CFA5	P26443	Glutamate dehydrogenase 1, mitochondrial	Glud1	amine catabolic process;amine metabolic process;biosynthetic process;carboxylic acid catabolic process;carboxylic acid metabolic process;catabolic process;cellular amine metabolic process;cellular amino acid biosynthetic process;cellular amino acid catabolic process;cellular amino acid metabolic process;cellular biosynthetic process;cellular catabolic process;cellular ketone metabolic process;cel…	cytoplasm;intracellular organelle lumen;intracellular part;mitochondrial matrix;mitochondrion;organelle lumen	cofactor binding	Alanine, aspartate and glutamate metabolism;Arginine and proline metabolism
P29341;Q9D4E6;Q62029;A2A5N3;Q91YZ8;D3Z5M2;A3KFU5;A3KFU8;Q6PHQ9;V9GXG3	P29341;Q9D4E6;Q62029	Polyadenylate-binding protein 1;Polyadenylate-binding protein	Pabpc1;Pabpc6;Pabpc2	catabolic process;cellular catabolic process;cellular macromolecule metabolic process;cellular metabolic process;cellular nitrogen compound metabolic process;macromolecule metabolic process;metabolic process;nitrogen compound metabolic process;nucleobase-containing compound metabolic process;primary metabolic process;RNA processing	cytoplasm;intracellular non-membrane-bounded organelle;intracellular part;non-membrane-bounded organelle;nuclear part;nucleus;ribonucleoprotein complex	nucleic acid binding;RNA binding
Q3TG75;P29758	Q3TG75;P29758	Ornithine aminotransferase, mitochondrial	Oat	amine metabolic process;biosynthetic process;carboxylic acid metabolic process;cellular amine metabolic process;cellular amino acid biosynthetic process;cellular amino acid metabolic process;cellular biosynthetic process;cellular ketone metabolic process;cellular metabolic process;cellular nitrogen compound metabolic process;glutamine family amino acid metabolic process;metabolic process;nitrogen…	intracellular organelle lumen;intracellular part;mitochondrial matrix;mitochondrion;organelle lumen	cofactor binding;vitamin binding	Arginine and proline metabolism
Q548W7;P31786;M0QWU8;Q4VWZ5;D3Z563	Q548W7;P31786;M0QWU8;Q4VWZ5	Acyl-CoA-binding protein	Dbi	cellular metabolic process;metabolic process;primary metabolic process;small molecule metabolic process	intracellular part;mitochondrion
P35700;B1AXW5;B1AXW6;B1AXW4	P35700;B1AXW5;B1AXW6;B1AXW4	Peroxiredoxin-1	Prdx1	catabolic process;cellular catabolic process;cellular metabolic process;metabolic process	chromosomal part;cytoplasm;intracellular non-membrane-bounded organelle;intracellular organelle lumen;intracellular part;mitochondrial matrix;mitochondrion;non-membrane-bounded organelle;nuclear part;nucleolus;nucleus;organelle lumen
P38647	P38647	Stress-70 protein, mitochondrial	Hspa9	cellular macromolecule metabolic process;cellular metabolic process;macromolecule metabolic process;metabolic process;primary metabolic process	cytoplasm;intracellular non-membrane-bounded organelle;intracellular part;mitochondrion;non-membrane-bounded organelle;nuclear part;nucleolus
P42125	P42125	Enoyl-CoA delta isomerase 1, mitochondrial	Eci1	carboxylic acid catabolic process;carboxylic acid metabolic process;catabolic process;cellular catabolic process;cellular ketone metabolic process;cellular metabolic process;metabolic process;organic acid catabolic process;organic acid metabolic process;oxoacid metabolic process;primary metabolic process;small molecule catabolic process;small molecule metabolic process	intracellular organelle lumen;intracellular part;mitochondrial matrix;mitochondrion;organelle lumen
P43274	P43274	Histone H1.4	Hist1h1e		chromosomal part;intracellular part;nuclear part;nucleus	nucleic acid binding
P45952;D6RFD7	P45952	Medium-chain specific acyl-CoA dehydrogenase, mitochondrial	Acadm	amine metabolic process;biosynthetic process;carboxylic acid catabolic process;carboxylic acid metabolic process;catabolic process;cellular amine metabolic process;cellular amino acid biosynthetic process;cellular amino acid metabolic process;cellular biosynthetic process;cellular catabolic process;cellular ketone metabolic process;cellular macromolecule biosynthetic process;cellular macromolecul…	intracellular organelle lumen;intracellular part;mitochondrial matrix;mitochondrion;nucleus;organelle lumen	cofactor binding	Propanoate metabolism;Valine, leucine and isoleucine degradation
Q544B1;P47738;A0A0G2JEU1;A0A0G2JFQ0;A0A0G2JF60;D3YYF3	Q544B1;P47738;A0A0G2JEU1	Aldehyde dehydrogenase, mitochondrial	Aldh2	catabolic process;metabolic process;small molecule catabolic process;small molecule metabolic process	intracellular organelle lumen;intracellular part;mitochondrial matrix;mitochondrion;organelle lumen		Arginine and proline metabolism;Propanoate metabolism;Valine, leucine and isoleucine degradation
Q58EU6;P47962;D3YYV8	Q58EU6;P47962;D3YYV8	60S ribosomal protein L5	Rpl5	biosynthetic process;cellular biosynthetic process;cellular macromolecule biosynthetic process;cellular macromolecule metabolic process;cellular metabolic process;cellular nitrogen compound metabolic process;macromolecule biosynthetic process;macromolecule metabolic process;metabolic process;nitrogen compound metabolic process;nucleobase-containing compound metabolic process;primary metabolic pro…	cytoplasm;cytosolic large ribosomal subunit;intracellular non-membrane-bounded organelle;intracellular part;large ribosomal subunit;non-membrane-bounded organelle;nuclear part;nucleolus;nucleus;ribonucleoprotein complex	nucleic acid binding;RNA binding;structural constituent of ribosome;structural molecule activity	Ribosome
P47963;A0A140T8K8	P47963;A0A140T8K8	60S ribosomal protein L13	Rpl13	biosynthetic process;cellular biosynthetic process;cellular macromolecule biosynthetic process;cellular macromolecule metabolic process;cellular metabolic process;macromolecule biosynthetic process;macromolecule metabolic process;metabolic process;primary metabolic process;translation	cytoplasm;cytosolic large ribosomal subunit;intracellular non-membrane-bounded organelle;intracellular part;large ribosomal subunit;non-membrane-bounded organelle;nuclear part;nucleolus;nucleus;ribonucleoprotein complex	structural constituent of ribosome;structural molecule activity	Ribosome
P49429;D3Z1U3;F6X9Z6	P49429	4-hydroxyphenylpyruvate dioxygenase	Hpd	amine catabolic process;amine metabolic process;carboxylic acid catabolic process;carboxylic acid metabolic process;catabolic process;cellular amine metabolic process;cellular amino acid catabolic process;cellular amino acid metabolic process;cellular catabolic process;cellular ketone metabolic process;cellular metabolic process;cellular nitrogen compound metabolic process;metabolic process;nitro…	intracellular part
Q3TF14;P50247;A2ALT5	Q3TF14;P50247	Adenosylhomocysteinase	Ahcy	cellular metabolic process;metabolic process;small molecule metabolic process	intracellular part
P50580;D3YVH7	P50580;D3YVH7	Proliferation-associated protein 2G4	Pa2g4	biosynthetic process;cellular biosynthetic process;cellular macromolecule biosynthetic process;cellular macromolecule metabolic process;cellular metabolic process;cellular nitrogen compound metabolic process;macromolecule biosynthetic process;macromolecule metabolic process;metabolic process;nitrogen compound metabolic process;nucleobase-containing compound metabolic process;primary metabolic pro…	cytoplasm;intracellular non-membrane-bounded organelle;intracellular part;non-membrane-bounded organelle;nuclear part;nucleolus;nucleoplasm;nucleus;ribonucleoprotein complex	nucleic acid binding
Q545S0;P52196	Q545S0;P52196	Sulfurtransferase;Thiosulfate sulfurtransferase	Tst		intracellular organelle lumen;intracellular part;mitochondrial matrix;mitochondrion;organelle lumen	nucleic acid binding;RNA binding
P52760	P52760	Ribonuclease UK114	Hrsp12		intracellular part;mitochondrion
P53395;A0A0G2JGU0	P53395	Lipoamide acyltransferase component of branched-chain alpha-keto acid dehydrogenase complex, mitochondrial	Dbt		intracellular non-membrane-bounded organelle;intracellular part;mitochondrion;non-membrane-bounded organelle		Valine, leucine and isoleucine degradation
Q544N9;P53986	Q544N9;P53986	Monocarboxylate transporter 1	Slc16a1	metabolic process;primary metabolic process	intracellular non-membrane-bounded organelle;intracellular part;mitochondrion;non-membrane-bounded organelle
P54071;D6RIL6;A0A0U1RP68;A0A0U1RPR1	P54071	Isocitrate dehydrogenase [NADP], mitochondrial	Idh2	acetyl-CoA metabolic process;carboxylic acid metabolic process;catabolic process;cellular catabolic process;cellular ketone metabolic process;cellular metabolic process;coenzyme metabolic process;cofactor metabolic process;metabolic process;organic acid metabolic process;oxoacid metabolic process;primary metabolic process;small molecule metabolic process	intracellular part;mitochondrion	cofactor binding	Citrate cycle (TCA cycle)
P54869	P54869	Hydroxymethylglutaryl-CoA synthase, mitochondrial	Hmgcs2	biosynthetic process;cellular biosynthetic process;cellular metabolic process;metabolic process;primary metabolic process;small molecule metabolic process	intracellular part;mitochondrion		Valine, leucine and isoleucine degradation
P55264	P55264	Adenosine kinase	Adk	biosynthetic process;cellular biosynthetic process;cellular metabolic process;cellular nitrogen compound metabolic process;metabolic process;nitrogen compound metabolic process;nucleobase-containing compound metabolic process;primary metabolic process;small molecule metabolic process	cytoplasm;intracellular part;nuclear part;nucleoplasm;nucleus
Q3ULT2;P57780;E9Q2W9;D3Z0L8;D3Z761;D3YY95	Q3ULT2;P57780;E9Q2W9	Alpha-actinin-4	Actn4	protein homotetramerization	cytoplasm;intracellular non-membrane-bounded organelle;intracellular part;non-membrane-bounded organelle;nucleus;ribonucleoprotein complex
P58252;G3UXK8	P58252	Elongation factor 2	Eef2	biosynthetic process;cellular biosynthetic process;cellular macromolecule biosynthetic process;cellular macromolecule metabolic process;cellular metabolic process;macromolecule biosynthetic process;macromolecule metabolic process;metabolic process	cytoplasm;intracellular part;nuclear part;nucleoplasm;nucleus;ribonucleoprotein complex	nucleic acid binding;RNA binding
Q3UIG0;P60229	Q3UIG0;P60229	Eukaryotic translation initiation factor 3 subunit E	Eif3e	catabolic process;cellular catabolic process;cellular macromolecule metabolic process;cellular metabolic process;cellular nitrogen compound metabolic process;macromolecule metabolic process;metabolic process;nitrogen compound metabolic process;nucleobase-containing compound metabolic process;primary metabolic process	cytoplasm;intracellular part;nuclear part;nucleus;ribonucleoprotein complex	nucleic acid binding;RNA binding
Q5BLK2;P60867	Q5BLK2;P60867	40S ribosomal protein S20	Rps20	biosynthetic process;cellular biosynthetic process;cellular macromolecule biosynthetic process;cellular macromolecule metabolic process;cellular metabolic process;macromolecule biosynthetic process;macromolecule metabolic process;metabolic process;primary metabolic process;translation	cytoplasm;cytosolic small ribosomal subunit;intracellular part;ribonucleoprotein complex;small ribosomal subunit	structural constituent of ribosome;structural molecule activity	Ribosome
Q4FZH2;P61255;B1ARA3;B1ARA5	Q4FZH2;P61255;B1ARA3;B1ARA5	60S ribosomal protein L26	Rpl26	biosynthetic process;cellular biosynthetic process;cellular macromolecule biosynthetic process;cellular macromolecule metabolic process;cellular metabolic process;cellular nitrogen compound metabolic process;macromolecule biosynthetic process;macromolecule metabolic process;metabolic process;nitrogen compound metabolic process;nucleobase-containing compound metabolic process;primary metabolic pro…	cytosolic large ribosomal subunit;intracellular part;large ribosomal subunit;ribonucleoprotein complex	structural constituent of ribosome;structural molecule activity	Ribosome
Q5BLJ9;P61358;A2A4Q0	Q5BLJ9;P61358	60S ribosomal protein L27	Rpl27	biosynthetic process;cellular biosynthetic process;cellular macromolecule biosynthetic process;cellular macromolecule metabolic process;cellular metabolic process;macromolecule biosynthetic process;macromolecule metabolic process;metabolic process;primary metabolic process;translation	intracellular non-membrane-bounded organelle;intracellular part;non-membrane-bounded organelle;ribonucleoprotein complex	structural constituent of ribosome;structural molecule activity	Ribosome
P61922;Q3TUE8;F7C9G3;F6RN86	P61922	4-aminobutyrate aminotransferase, mitochondrial	Abat	amine metabolic process;carboxylic acid metabolic process;catabolic process;cellular amine metabolic process;cellular amino acid metabolic process;cellular catabolic process;cellular ketone metabolic process;cellular metabolic process;cellular nitrogen compound metabolic process;metabolic process;nitrogen compound metabolic process;organic acid metabolic process;oxoacid metabolic process;primary …	intracellular organelle lumen;intracellular part;mitochondrial matrix;mitochondrion;organelle lumen	cofactor binding;vitamin binding	Alanine, aspartate and glutamate metabolism;Propanoate metabolism;Valine, leucine and isoleucine degradation
Q497E9;P62242	Q497E9;P62242	40S ribosomal protein S8	Rps8	biosynthetic process;cellular biosynthetic process;cellular macromolecule biosynthetic process;cellular macromolecule metabolic process;cellular metabolic process;cellular nitrogen compound metabolic process;macromolecule biosynthetic process;macromolecule metabolic process;metabolic process;nitrogen compound metabolic process;nucleobase-containing compound metabolic process;primary metabolic pro…	cytoplasm;cytosolic small ribosomal subunit;intracellular part;nucleus;ribonucleoprotein complex;small ribosomal subunit	structural constituent of ribosome;structural molecule activity	Ribosome
Q5M9M4;P62245;F8WJ41;D3YVB4;D3Z712	Q5M9M4;P62245;F8WJ41;D3YVB4;D3Z712	40S ribosomal protein S15a	Rps15a	biosynthetic process;cellular biosynthetic process;cellular macromolecule biosynthetic process;cellular macromolecule metabolic process;cellular metabolic process;macromolecule biosynthetic process;macromolecule metabolic process;metabolic process;primary metabolic process;translation	cytosolic small ribosomal subunit;intracellular part;ribonucleoprotein complex;small ribosomal subunit	structural constituent of ribosome;structural molecule activity	Ribosome
Q3UC02;P62281	Q3UC02;P62281	40S ribosomal protein S11	Rps11	biosynthetic process;cellular biosynthetic process;cellular macromolecule biosynthetic process;cellular macromolecule metabolic process;cellular metabolic process;macromolecule biosynthetic process;macromolecule metabolic process;metabolic process;primary metabolic process;translation	cytoplasm;cytosolic small ribosomal subunit;intracellular non-membrane-bounded organelle;intracellular part;non-membrane-bounded organelle;nuclear part;nucleolus;ribonucleoprotein complex;small ribosomal subunit	nucleic acid binding;RNA binding;structural constituent of ribosome;structural molecule activity	Ribosome
Q545X8;P62702;V9GWY0	Q545X8;P62702;V9GWY0	40S ribosomal protein S4;40S ribosomal protein S4, X isoform	Rps4x;Gm15013	biosynthetic process;cellular biosynthetic process;cellular macromolecule biosynthetic process;cellular macromolecule metabolic process;cellular metabolic process;macromolecule biosynthetic process;macromolecule metabolic process;metabolic process;primary metabolic process;translation	intracellular non-membrane-bounded organelle;intracellular part;non-membrane-bounded organelle;nucleus;ribonucleoprotein complex;small ribosomal subunit	nucleic acid binding;RNA binding;structural constituent of ribosome;structural molecule activity	Ribosome
P62717;F6YJW4	P62717	60S ribosomal protein L18a	Rpl18a	biosynthetic process;cellular biosynthetic process;cellular macromolecule biosynthetic process;cellular macromolecule metabolic process;cellular metabolic process;macromolecule biosynthetic process;macromolecule metabolic process;metabolic process;primary metabolic process;translation	cytosolic large ribosomal subunit;intracellular non-membrane-bounded organelle;intracellular part;large ribosomal subunit;non-membrane-bounded organelle;ribonucleoprotein complex	structural constituent of ribosome;structural molecule activity	Ribosome
Q5BLK1;P62754	Q5BLK1;P62754	40S ribosomal protein S6	Rps6	biosynthetic process;cellular biosynthetic process;cellular macromolecule biosynthetic process;cellular macromolecule metabolic process;cellular metabolic process;cellular nitrogen compound metabolic process;macromolecule biosynthetic process;macromolecule metabolic process;metabolic process;nitrogen compound metabolic process;nucleobase-containing compound metabolic process;primary metabolic pro…	cytoplasm;cytosolic small ribosomal subunit;intracellular non-membrane-bounded organelle;intracellular part;non-membrane-bounded organelle;nuclear part;nucleolus;nucleus;ribonucleoprotein complex;small ribosomal subunit	structural constituent of ribosome;structural molecule activity	Ribosome
P62827;Q14AA6;A6H622;Q61820	P62827;Q14AA6;A6H622;Q61820	GTP-binding nuclear protein Ran;GTP-binding nuclear protein Ran, testis-specific isoform	Ran;1700009N14Rik;Rasl2-9	metabolic process	chromosomal part;cytoplasm;intracellular non-membrane-bounded organelle;intracellular part;non-membrane-bounded organelle;nuclear part;nucleolus;nucleoplasm;nucleus
P62830;A2A6F8	P62830	60S ribosomal protein L23	Rpl23	biosynthetic process;cellular biosynthetic process;cellular macromolecule biosynthetic process;cellular macromolecule metabolic process;cellular metabolic process;macromolecule biosynthetic process;macromolecule metabolic process;metabolic process;primary metabolic process;translation	cytoplasm;cytosolic large ribosomal subunit;intracellular non-membrane-bounded organelle;intracellular part;large ribosomal subunit;non-membrane-bounded organelle;nuclear part;nucleolus;ribonucleoprotein complex	structural constituent of ribosome;structural molecule activity	Ribosome
Q58DZ3;P62889	Q58DZ3;P62889	60S ribosomal protein L30	Rpl30	biosynthetic process;cellular biosynthetic process;cellular macromolecule biosynthetic process;cellular macromolecule metabolic process;cellular metabolic process;macromolecule biosynthetic process;macromolecule metabolic process;metabolic process;primary metabolic process;translation	cytoplasm;cytosolic large ribosomal subunit;intracellular part;large ribosomal subunit;nucleus;ribonucleoprotein complex	structural constituent of ribosome;structural molecule activity	Ribosome
Q56A15;P62897;CON__P62894	Q56A15;P62897	Cytochrome c, somatic	Cycs	cellular metabolic process;metabolic process	intracellular part;mitochondrion
Q5YLW3;P62908;D3YV43;A0A140LI77	Q5YLW3;P62908;D3YV43;A0A140LI77	40S ribosomal protein S3	Rps3	biosynthetic process;catabolic process;cellular biosynthetic process;cellular catabolic process;cellular macromolecule biosynthetic process;cellular macromolecule metabolic process;cellular metabolic process;cellular nitrogen compound metabolic process;macromolecule biosynthetic process;macromolecule metabolic process;metabolic process;nitrogen compound metabolic process;nucleobase-containing com…	cytoplasm;cytosolic small ribosomal subunit;intracellular non-membrane-bounded organelle;intracellular part;non-membrane-bounded organelle;nuclear part;nucleolus;nucleus;ribonucleoprotein complex;small ribosomal subunit	nucleic acid binding;RNA binding;structural constituent of ribosome;structural molecule activity	Ribosome
P62911	P62911	60S ribosomal protein L32	Rpl32	biosynthetic process;cellular biosynthetic process;cellular macromolecule biosynthetic process;cellular macromolecule metabolic process;cellular metabolic process;macromolecule biosynthetic process;macromolecule metabolic process;metabolic process;primary metabolic process;translation	cytosolic large ribosomal subunit;intracellular non-membrane-bounded organelle;intracellular part;large ribosomal subunit;non-membrane-bounded organelle;ribonucleoprotein complex	structural constituent of ribosome;structural molecule activity	Ribosome
P62918	P62918	60S ribosomal protein L8	Rpl8	biosynthetic process;cellular biosynthetic process;cellular macromolecule biosynthetic process;cellular macromolecule metabolic process;cellular metabolic process;macromolecule biosynthetic process;macromolecule metabolic process;metabolic process;primary metabolic process;translation	cytoplasm;cytosolic large ribosomal subunit;intracellular non-membrane-bounded organelle;intracellular part;large ribosomal subunit;non-membrane-bounded organelle;nuclear part;nucleolus;ribonucleoprotein complex	nucleic acid binding;RNA binding;structural constituent of ribosome;structural molecule activity	Ribosome
P63017;Q504P4;D3Z5E2;D3YW43	P63017;Q504P4	Heat shock cognate 71 kDa protein	Hspa8	biosynthetic process;cellular biosynthetic process;cellular macromolecule biosynthetic process;cellular macromolecule metabolic process;cellular metabolic process;cellular nitrogen compound metabolic process;macromolecule biosynthetic process;macromolecule metabolic process;metabolic process;nitrogen compound metabolic process;nucleobase-containing compound metabolic process;primary metabolic pro…	intracellular non-membrane-bounded organelle;intracellular part;non-membrane-bounded organelle;nuclear part;nucleolus;nucleus;ribonucleoprotein complex
Q3UX28;P63030;D3YWY6;D3Z5S0;E9Q0V4;D3Z786	Q3UX28;P63030;D3YWY6;D3Z5S0;E9Q0V4;D3Z786	Mitochondrial pyruvate carrier 1	Mpc1	carboxylic acid metabolic process;cellular ketone metabolic process;cellular metabolic process;metabolic process;organic acid metabolic process;oxoacid metabolic process;small molecule metabolic process	intracellular part;mitochondrion
P63101;D3YXN6;D3YXF4;D3YW45	P63101	14-3-3 protein zeta/delta	Ywhaz		intracellular part;mitochondrion;nucleus
P63242;A0A0A0MQM0;J3QPS8;Q8BGY2	P63242;A0A0A0MQM0;J3QPS8	Eukaryotic translation initiation factor 5A-1;Eukaryotic translation initiation factor 5A	Eif5a		cytoplasm;intracellular part;nuclear part;nucleus	nucleic acid binding;RNA binding
Q3UW83;Q5M9K7;P63325	Q3UW83;Q5M9K7;P63325	40S ribosomal protein S10	Rps10		cytoplasm;cytosolic small ribosomal subunit;intracellular non-membrane-bounded organelle;intracellular part;non-membrane-bounded organelle;nuclear part;nucleolus;ribonucleoprotein complex;small ribosomal subunit	structural constituent of ribosome;structural molecule activity	Ribosome
P68040	P68040	Guanine nucleotide-binding protein subunit beta-2-like 1;Guanine nucleotide-binding protein subunit beta-2-like 1, N-terminally processed	Gnb2l1		cytoplasm;intracellular non-membrane-bounded organelle;intracellular part;mitochondrion;non-membrane-bounded organelle;nucleus;ribonucleoprotein complex;small ribosomal subunit
Q564F3;P97351	Q564F3;P97351	40S ribosomal protein S3a	Rps3a1;Rps3a	biosynthetic process;cellular biosynthetic process;cellular macromolecule biosynthetic process;cellular macromolecule metabolic process;cellular metabolic process;macromolecule biosynthetic process;macromolecule metabolic process;metabolic process;primary metabolic process;translation	cytosolic small ribosomal subunit;intracellular non-membrane-bounded organelle;intracellular part;non-membrane-bounded organelle;nuclear part;nucleolus;nucleus;ribonucleoprotein complex;small ribosomal subunit	structural constituent of ribosome;structural molecule activity	Ribosome
Q7TQD5;P97742;Q924X2	Q7TQD5;P97742	Carnitine O-palmitoyltransferase 1, liver isoform	Cpt1a	amine metabolic process;carboxylic acid catabolic process;carboxylic acid metabolic process;catabolic process;cellular amine metabolic process;cellular amino acid metabolic process;cellular catabolic process;cellular ketone metabolic process;cellular metabolic process;cellular nitrogen compound metabolic process;metabolic process;nitrogen compound metabolic process;organic acid catabolic process;…	intracellular part;mitochondrion
P97807;H3BKG7	P97807	Fumarate hydratase, mitochondrial	Fh	acetyl-CoA metabolic process;carboxylic acid metabolic process;catabolic process;cellular catabolic process;cellular ketone metabolic process;cellular metabolic process;coenzyme metabolic process;cofactor metabolic process;metabolic process;organic acid metabolic process;oxoacid metabolic process;small molecule metabolic process	intracellular part;mitochondrion		Citrate cycle (TCA cycle)
P99027	P99027	60S acidic ribosomal protein P2	Rplp2	biosynthetic process;cellular biosynthetic process;cellular macromolecule biosynthetic process;cellular macromolecule metabolic process;cellular metabolic process;macromolecule biosynthetic process;macromolecule metabolic process;metabolic process	cytosolic large ribosomal subunit;intracellular part;large ribosomal subunit;ribonucleoprotein complex	structural constituent of ribosome;structural molecule activity	Ribosome
P99029;G3UZJ4;H3BJQ7	P99029;G3UZJ4;H3BJQ7	Peroxiredoxin-5, mitochondrial	Prdx5	catabolic process;cellular catabolic process;cellular metabolic process;cellular nitrogen compound metabolic process;coenzyme metabolic process;cofactor metabolic process;metabolic process;nitrogen compound metabolic process;nucleobase-containing compound metabolic process;primary metabolic process;small molecule metabolic process	cytoplasm;intracellular organelle lumen;intracellular part;mitochondrion;nucleus;organelle lumen	nucleic acid binding
Q00519	Q00519	Xanthine dehydrogenase/oxidase;Xanthine dehydrogenase;Xanthine oxidase	Xdh	catabolic process;cellular catabolic process;cellular metabolic process;cellular nitrogen compound metabolic process;metabolic process;nitrogen compound metabolic process;nucleobase-containing compound metabolic process;primary metabolic process;small molecule metabolic process	intracellular part	cofactor binding
Q01853	Q01853	Transitional endoplasmic reticulum ATPase	Vcp	biosynthetic process;catabolic process;cellular biosynthetic process;cellular catabolic process;cellular macromolecule biosynthetic process;cellular macromolecule metabolic process;cellular metabolic process;cellular nitrogen compound metabolic process;macromolecule biosynthetic process;macromolecule metabolic process;metabolic process;nitrogen compound metabolic process;nucleobase-containing com…	chromosomal part;cytoplasm;intracellular part;nuclear part;nucleoplasm;nucleus
Q07417	Q07417	Short-chain specific acyl-CoA dehydrogenase, mitochondrial	Acads	carboxylic acid catabolic process;carboxylic acid metabolic process;catabolic process;cellular catabolic process;cellular ketone metabolic process;cellular metabolic process;metabolic process;organic acid catabolic process;organic acid metabolic process;oxoacid metabolic process;primary metabolic process;protein homotetramerization;small molecule catabolic process;small molecule metabolic process	intracellular organelle lumen;intracellular part;mitochondrial matrix;mitochondrion;nucleus;organelle lumen	cofactor binding	Valine, leucine and isoleucine degradation
Q14AZ9;Q8BGC4	Q14AZ9;Q8BGC4	Zinc-binding alcohol dehydrogenase domain-containing protein 2	Zadh2		intracellular part;mitochondrion
Q3TL44	Q3TL44	NLR family member X1	Nlrx1		intracellular part;mitochondrion
Q3TWI2;Q99LB7;A2AH52;A2AH53	Q3TWI2;Q99LB7	Sarcosine dehydrogenase, mitochondrial	Sardh		intracellular organelle lumen;intracellular part;mitochondrial matrix;mitochondrion;organelle lumen		Glycine, serine and threonine metabolism
Q3U3J1;P50136;A0A0U1RPK5	Q3U3J1;P50136	2-oxoisovalerate dehydrogenase subunit alpha, mitochondrial	Bckdha	amine catabolic process;amine metabolic process;carboxylic acid catabolic process;carboxylic acid metabolic process;catabolic process;cellular amine metabolic process;cellular amino acid catabolic process;cellular amino acid metabolic process;cellular catabolic process;cellular ketone metabolic process;cellular metabolic process;cellular nitrogen compound metabolic process;metabolic process;nitro…	intracellular part;mitochondrion		Valine, leucine and isoleucine degradation
Q3UEG6;H7BWY3;D3YZ49;D3YZ52	Q3UEG6;H7BWY3	Alanine--glyoxylate aminotransferase 2, mitochondrial	Agxt2	amine catabolic process;amine metabolic process;biosynthetic process;carboxylic acid catabolic process;carboxylic acid metabolic process;catabolic process;cellular amine metabolic process;cellular amino acid biosynthetic process;cellular amino acid catabolic process;cellular amino acid metabolic process;cellular biosynthetic process;cellular catabolic process;cellular ketone metabolic process;cel…	intracellular part;mitochondrion	cofactor binding;vitamin binding	Alanine, aspartate and glutamate metabolism;Glycine, serine and threonine metabolism
Q3UEL5;Q8VC12	Q3UEL5;Q8VC12	Urocanate hydratase	Uroc1	amine catabolic process;amine metabolic process;carboxylic acid catabolic process;carboxylic acid metabolic process;catabolic process;cellular amine metabolic process;cellular amino acid catabolic process;cellular amino acid metabolic process;cellular catabolic process;cellular ketone metabolic process;cellular metabolic process;cellular nitrogen compound metabolic process;glutamine family amino …	intracellular part
Q3UEN8;Q64459;Q9JMA7;Q64481	Q3UEN8;Q64459	Cytochrome P450 3A11	Cyp3a11		intracellular part
Q3UEQ9;Q99K67;F6VMP2	Q3UEQ9;Q99K67	Alpha-aminoadipic semialdehyde synthase, mitochondrial;Lysine ketoglutarate reductase;Saccharopine dehydrogenase	Aass	acetyl-CoA metabolic process;amine catabolic process;amine metabolic process;carboxylic acid catabolic process;carboxylic acid metabolic process;catabolic process;cellular amine metabolic process;cellular amino acid catabolic process;cellular amino acid metabolic process;cellular catabolic process;cellular ketone metabolic process;cellular metabolic process;cellular nitrogen compound metabolic pr…	intracellular part;mitochondrion
Q3UER1;Q91Y97	Q3UER1;Q91Y97	Fructose-bisphosphate aldolase;Fructose-bisphosphate aldolase B	Aldob	catabolic process;cellular metabolic process;cellular nitrogen compound metabolic process;coenzyme metabolic process;cofactor metabolic process;metabolic process;nitrogen compound metabolic process;nucleobase-containing compound metabolic process;primary metabolic process;small molecule catabolic process;small molecule metabolic process	intracellular part
Q3ULL5;Q99L45	Q3ULL5;Q99L45	Eukaryotic translation initiation factor 2 subunit 2	Eif2s2		cytoplasm;intracellular part	nucleic acid binding;RNA binding
Q3UW66;Q99J99	Q3UW66;Q99J99	Sulfurtransferase;3-mercaptopyruvate sulfurtransferase	Mpst	biosynthetic process;cellular biosynthetic process;cellular metabolic process;metabolic process	cytoplasm;intracellular part;mitochondrion
Q3UW87;Q64464	Q3UW87;Q64464	Cytochrome P450 3A13	Cyp3a13		intracellular part
Q3V117;Q91V92;Q3TS02	Q3V117;Q91V92	ATP-citrate synthase	Acly	acetyl-CoA metabolic process;biosynthetic process;cellular biosynthetic process;cellular metabolic process;coenzyme metabolic process;cofactor metabolic process;metabolic process;primary metabolic process	cytoplasm;intracellular part;mitochondrion;nuclear part;nucleoplasm	cofactor binding	Citrate cycle (TCA cycle)
Q4FJK0;Q9CQ62	Q4FJK0;Q9CQ62	2,4-dienoyl-CoA reductase, mitochondrial	Decr1	carboxylic acid catabolic process;carboxylic acid metabolic process;catabolic process;cellular catabolic process;cellular ketone metabolic process;cellular metabolic process;metabolic process;organic acid catabolic process;organic acid metabolic process;oxoacid metabolic process;primary metabolic process;protein homotetramerization;small molecule catabolic process;small molecule metabolic process	cytoplasm;intracellular part;mitochondrion;nuclear part;nucleoplasm;nucleus	cofactor binding
Q4KL76;Q64433	Q4KL76;Q64433	10 kDa heat shock protein, mitochondrial	Hspe1	cellular macromolecule metabolic process;cellular metabolic process;macromolecule metabolic process;metabolic process;primary metabolic process	intracellular organelle lumen;intracellular part;mitochondrial matrix;mitochondrion;organelle lumen
Q4VA32;Q9CQR4	Q4VA32;Q9CQR4	Acyl-coenzyme A thioesterase 13;Acyl-coenzyme A thioesterase 13, N-terminally processed	Acot13	metabolic process;protein homotetramerization	intracellular non-membrane-bounded organelle;intracellular part;mitochondrion;non-membrane-bounded organelle;nucleus
Q543E2;Q9WVD5	Q543E2;Q9WVD5	Mitochondrial ornithine transporter 1	Slc25a15		intracellular part;mitochondrion
Q564E8;Q9D8E6	Q564E8;Q9D8E6	60S ribosomal protein L4	Rpl4	biosynthetic process;cellular biosynthetic process;cellular macromolecule biosynthetic process;cellular macromolecule metabolic process;cellular metabolic process;macromolecule biosynthetic process;macromolecule metabolic process;metabolic process;primary metabolic process;translation	cytoplasm;cytosolic large ribosomal subunit;intracellular non-membrane-bounded organelle;intracellular part;large ribosomal subunit;non-membrane-bounded organelle;nuclear part;nucleolus;nucleus;ribonucleoprotein complex	structural constituent of ribosome;structural molecule activity	Ribosome
Q5FW57;M0QWP3	Q5FW57;M0QWP3	Glycine N-acyltransferase-like protein	Gm4952		intracellular part;mitochondrion
Q5SXR6;Q68FD5;F6Z1R4	Q5SXR6;Q68FD5	Clathrin heavy chain;Clathrin heavy chain 1	Cltc	cellular macromolecule metabolic process;cellular metabolic process;macromolecule metabolic process;metabolic process	chromosomal part;cytoplasm;intracellular non-membrane-bounded organelle;intracellular part;mitochondrion;non-membrane-bounded organelle	nucleic acid binding;RNA binding;structural molecule activity
Q60597;Z4YJV4;E9Q7L0;Q5SVY1;Q5SVY0	Q60597;Z4YJV4	2-oxoglutarate dehydrogenase, mitochondrial	Ogdh	acetyl-CoA metabolic process;carboxylic acid metabolic process;catabolic process;cellular catabolic process;cellular ketone metabolic process;cellular metabolic process;cellular nitrogen compound metabolic process;coenzyme metabolic process;cofactor metabolic process;metabolic process;nitrogen compound metabolic process;nucleobase-containing compound metabolic process;organic acid metabolic proce…	intracellular organelle lumen;intracellular part;mitochondrial matrix;mitochondrion;organelle lumen	cofactor binding;vitamin binding	Citrate cycle (TCA cycle)
Q61171;D3Z4A4	Q61171;D3Z4A4	Peroxiredoxin-2	Prdx2	catabolic process;cellular catabolic process;cellular macromolecule metabolic process;cellular metabolic process;macromolecule metabolic process;metabolic process;primary metabolic process	intracellular part;mitochondrion
Q61176	Q61176	Arginase-1	Arg1	amine metabolic process;biosynthetic process;carboxylic acid metabolic process;cellular amine metabolic process;cellular amino acid metabolic process;cellular biosynthetic process;cellular ketone metabolic process;cellular metabolic process;cellular nitrogen compound metabolic process;glutamine family amino acid metabolic process;macromolecule biosynthetic process;macromolecule metabolic process;…	cytoplasm;intracellular part;nucleus		Arginine and proline metabolism
Q61425	Q61425	Hydroxyacyl-coenzyme A dehydrogenase, mitochondrial	Hadh	carboxylic acid catabolic process;carboxylic acid metabolic process;catabolic process;cellular catabolic process;cellular ketone metabolic process;cellular metabolic process;metabolic process;organic acid catabolic process;organic acid metabolic process;oxoacid metabolic process;primary metabolic process;small molecule catabolic process;small molecule metabolic process	cytoplasm;intracellular organelle lumen;intracellular part;mitochondrial matrix;mitochondrion;nuclear part;nucleoplasm;organelle lumen	cofactor binding	Valine, leucine and isoleucine degradation
Q62425;A0A0N4SVQ1	Q62425;A0A0N4SVQ1	Cytochrome c oxidase subunit NDUFA4	Ndufa4		intracellular part;mitochondrion
Q6P3A8	Q6P3A8	2-oxoisovalerate dehydrogenase subunit beta, mitochondrial	Bckdhb	amine catabolic process;amine metabolic process;carboxylic acid catabolic process;carboxylic acid metabolic process;catabolic process;cellular amine metabolic process;cellular amino acid catabolic process;cellular amino acid metabolic process;cellular catabolic process;cellular ketone metabolic process;cellular metabolic process;cellular nitrogen compound metabolic process;metabolic process;nitro…	intracellular part;mitochondrion		Valine, leucine and isoleucine degradation
Q6PB66;F6V2A3	Q6PB66	Leucine-rich PPR motif-containing protein, mitochondrial	Lrpprc	biosynthetic process;cellular biosynthetic process;cellular macromolecule biosynthetic process;cellular macromolecule metabolic process;cellular metabolic process;cellular nitrogen compound metabolic process;macromolecule biosynthetic process;macromolecule metabolic process;metabolic process;nitrogen compound metabolic process;nucleobase-containing compound metabolic process;primary metabolic pro…	cytoplasm;intracellular non-membrane-bounded organelle;intracellular part;mitochondrion;non-membrane-bounded organelle;nuclear part;nucleoplasm;nucleus;ribonucleoprotein complex	nucleic acid binding;RNA binding
Q6ZWN5;F7CJS8;D3YWH9;Q9CXW7;D3Z673;D3YUV6	Q6ZWN5;F7CJS8;D3YWH9;Q9CXW7	40S ribosomal protein S9	Rps9	biosynthetic process;cellular biosynthetic process;cellular macromolecule biosynthetic process;cellular macromolecule metabolic process;cellular metabolic process;macromolecule biosynthetic process;macromolecule metabolic process;metabolic process;primary metabolic process;translation	cytoplasm;cytosolic small ribosomal subunit;intracellular non-membrane-bounded organelle;intracellular part;non-membrane-bounded organelle;nuclear part;nucleolus;nucleus;ribonucleoprotein complex;small ribosomal subunit	nucleic acid binding;RNA binding;structural constituent of ribosome;structural molecule activity	Ribosome
Q6ZWX6	Q6ZWX6	Eukaryotic translation initiation factor 2 subunit 1	Eif2s1	biosynthetic process;cellular biosynthetic process;cellular macromolecule biosynthetic process;cellular macromolecule metabolic process;cellular metabolic process;macromolecule biosynthetic process;macromolecule metabolic process;metabolic process;primary metabolic process;translation	cytoplasm;intracellular non-membrane-bounded organelle;intracellular part;non-membrane-bounded organelle;nucleus;ribonucleoprotein complex	nucleic acid binding;RNA binding
Q71RI9;A0A0G2JGE1;D6RJ70	Q71RI9;A0A0G2JGE1	Kynurenine--oxoglutarate transaminase 3	Ccbl2	amine metabolic process;biosynthetic process;carboxylic acid metabolic process;cellular amine metabolic process;cellular amino acid metabolic process;cellular ketone metabolic process;cellular metabolic process;cellular nitrogen compound metabolic process;metabolic process;nitrogen compound metabolic process;organic acid metabolic process;oxoacid metabolic process;primary metabolic process;small …	intracellular part;mitochondrion	cofactor binding;vitamin binding
Q76MZ3;G3UWL2;H3BIV7;Q3TTF6;H3BKU1;G3UWS4;Q7TNP2;G3UXQ1;H3BJ83;H3BLQ0;H3BLE7	Q76MZ3	Serine/threonine-protein phosphatase 2A 65 kDa regulatory subunit A alpha isoform	Ppp2r1a	cellular macromolecule metabolic process;cellular metabolic process;macromolecule metabolic process;metabolic process;primary metabolic process	chromosomal part;intracellular part
Q8BH00;F6T4U0	Q8BH00	Aldehyde dehydrogenase family 8 member A1	Aldh8a1	biosynthetic process;carboxylic acid metabolic process;cellular biosynthetic process;cellular ketone metabolic process;cellular metabolic process;metabolic process;organic acid metabolic process;oxoacid metabolic process;primary metabolic process;small molecule metabolic process	cytoplasm;intracellular part
Q8BH95;F6T930	Q8BH95;F6T930	Enoyl-CoA hydratase, mitochondrial	Echs1	carboxylic acid catabolic process;carboxylic acid metabolic process;catabolic process;cellular catabolic process;cellular ketone metabolic process;cellular metabolic process;metabolic process;organic acid catabolic process;organic acid metabolic process;oxoacid metabolic process;primary metabolic process;small molecule catabolic process;small molecule metabolic process	intracellular organelle lumen;intracellular part;mitochondrial matrix;mitochondrion;organelle lumen		Propanoate metabolism;Valine, leucine and isoleucine degradation
Q8BP67;F6RSK3	Q8BP67	60S ribosomal protein L24	Rpl24	biosynthetic process;cellular biosynthetic process;cellular macromolecule biosynthetic process;cellular macromolecule metabolic process;cellular metabolic process;macromolecule biosynthetic process;macromolecule metabolic process;metabolic process;primary metabolic process;translation	cytosolic large ribosomal subunit;intracellular part;large ribosomal subunit;ribonucleoprotein complex	structural constituent of ribosome;structural molecule activity	Ribosome
Q8C196;E9QAI5;G3UWN2;B2RQC6;E9QAT6	Q8C196	Carbamoyl-phosphate synthase [ammonia], mitochondrial	Cps1	amine catabolic process;amine metabolic process;biosynthetic process;carboxylic acid catabolic process;carboxylic acid metabolic process;catabolic process;cellular amine metabolic process;cellular amino acid biosynthetic process;cellular amino acid catabolic process;cellular amino acid metabolic process;cellular biosynthetic process;cellular catabolic process;cellular ketone metabolic process;cel…	cytoplasm;intracellular non-membrane-bounded organelle;intracellular part;mitochondrion;non-membrane-bounded organelle;nuclear part;nucleolus;nucleoplasm;nucleus		Alanine, aspartate and glutamate metabolism;Arginine and proline metabolism
Q8CG76	Q8CG76	Aflatoxin B1 aldehyde reductase member 2	Akr7a2		intracellular part;mitochondrion
Q8CHR6;A0A0G2JF48	Q8CHR6	Dihydropyrimidine dehydrogenase [NADP(+)]	Dpyd	amine metabolic process;biosynthetic process;carboxylic acid metabolic process;catabolic process;cellular amine metabolic process;cellular amino acid biosynthetic process;cellular amino acid metabolic process;cellular biosynthetic process;cellular catabolic process;cellular ketone metabolic process;cellular metabolic process;cellular nitrogen compound metabolic process;metabolic process;nitrogen …	cytoplasm;intracellular part
Q8CHT0	Q8CHT0	Delta-1-pyrroline-5-carboxylate dehydrogenase, mitochondrial	Aldh4a1	amine catabolic process;amine metabolic process;biosynthetic process;carboxylic acid catabolic process;carboxylic acid metabolic process;catabolic process;cellular amine metabolic process;cellular amino acid biosynthetic process;cellular amino acid catabolic process;cellular amino acid metabolic process;cellular biosynthetic process;cellular catabolic process;cellular ketone metabolic process;cel…	intracellular organelle lumen;intracellular part;mitochondrial matrix;mitochondrion;organelle lumen		Alanine, aspartate and glutamate metabolism;Arginine and proline metabolism
Q8QZT1	Q8QZT1	Acetyl-CoA acetyltransferase, mitochondrial	Acat1		intracellular organelle lumen;intracellular part;mitochondrial matrix;mitochondrion;organelle lumen	cofactor binding	Propanoate metabolism;Valine, leucine and isoleucine degradation
Q8R164	Q8R164	Valacyclovir hydrolase	Bphl		intracellular part;mitochondrion
Q8VC30	Q8VC30	Bifunctional ATP-dependent dihydroxyacetone kinase/FAD-AMP lyase (cyclizing);ATP-dependent dihydroxyacetone kinase;FAD-AMP lyase (cyclizing)	Dak	cellular metabolic process;metabolic process;primary metabolic process;small molecule metabolic process	intracellular part;nucleus
Q8VCN5	Q8VCN5	Cystathionine gamma-lyase	Cth	amine metabolic process;biosynthetic process;carboxylic acid metabolic process;cellular amine metabolic process;cellular amino acid biosynthetic process;cellular amino acid metabolic process;cellular biosynthetic process;cellular ketone metabolic process;cellular macromolecule metabolic process;cellular metabolic process;cellular nitrogen compound metabolic process;macromolecule metabolic process…	cytoplasm;intracellular part;nuclear part;nucleoplasm;nucleus	cofactor binding;vitamin binding	Glycine, serine and threonine metabolism
Q8VCZ9;F7CED2;D3Z5H4;D3YV12;D6RET3	Q8VCZ9;F7CED2;D3Z5H4;D3YV12	Probable proline dehydrogenase 2	Prodh2	amine catabolic process;amine metabolic process;carboxylic acid catabolic process;carboxylic acid metabolic process;catabolic process;cellular amine metabolic process;cellular amino acid catabolic process;cellular amino acid metabolic process;cellular catabolic process;cellular ketone metabolic process;cellular metabolic process;cellular nitrogen compound metabolic process;glutamine family amino …	intracellular part;mitochondrion		Arginine and proline metabolism
Q8VDK1;D3Z3I3;D3YY53;D3Z2Y2	Q8VDK1;D3Z3I3;D3YY53	Nitrilase homolog 1	Nit1	metabolic process;nitrogen compound metabolic process	intracellular part;mitochondrion;nucleus
Q91VA0;D3Z106;D3YV36	Q91VA0;D3Z106	Acyl-coenzyme A synthetase ACSM1, mitochondrial	Acsm1	biosynthetic process;carboxylic acid metabolic process;cellular biosynthetic process;cellular ketone metabolic process;cellular metabolic process;metabolic process;organic acid metabolic process;oxoacid metabolic process;primary metabolic process;small molecule metabolic process	intracellular organelle lumen;intracellular part;mitochondrial matrix;mitochondrion;organelle lumen
Q91VA7;V9GXV0	Q91VA7	Isocitrate dehydrogenase [NAD] subunit, mitochondrial	Idh3b	acetyl-CoA metabolic process;carboxylic acid metabolic process;catabolic process;cellular catabolic process;cellular ketone metabolic process;cellular metabolic process;cellular nitrogen compound metabolic process;coenzyme metabolic process;cofactor metabolic process;metabolic process;nitrogen compound metabolic process;nucleobase-containing compound metabolic process;organic acid metabolic proce…	intracellular part;mitochondrion;nucleus	cofactor binding	Citrate cycle (TCA cycle)
Q91VT4;D3Z6C4	Q91VT4;D3Z6C4	Carbonyl reductase family member 4	Cbr4	biosynthetic process;carboxylic acid metabolic process;cellular biosynthetic process;cellular ketone metabolic process;cellular metabolic process;metabolic process;organic acid metabolic process;oxoacid metabolic process;primary metabolic process;protein homotetramerization;small molecule metabolic process	intracellular organelle lumen;intracellular part;mitochondrial matrix;mitochondrion;organelle lumen	cofactor binding
Q91W43	Q91W43	Glycine dehydrogenase (decarboxylating), mitochondrial	Gldc	amine catabolic process;amine metabolic process;carboxylic acid catabolic process;carboxylic acid metabolic process;catabolic process;cellular amine metabolic process;cellular amino acid catabolic process;cellular amino acid metabolic process;cellular catabolic process;cellular ketone metabolic process;cellular metabolic process;cellular nitrogen compound metabolic process;metabolic process;nitro…	intracellular part;mitochondrion	cofactor binding;vitamin binding	Glycine, serine and threonine metabolism
Q91WT9;D3YUF2;D3YYN0;D3Z4K2	Q91WT9;D3YUF2;D3YYN0	Cystathionine beta-synthase	Cbs	amine metabolic process;biosynthetic process;carboxylic acid metabolic process;cellular amine metabolic process;cellular amino acid biosynthetic process;cellular amino acid metabolic process;cellular biosynthetic process;cellular ketone metabolic process;cellular metabolic process;cellular nitrogen compound metabolic process;metabolic process;nitrogen compound metabolic process;organic acid metab…	cytoplasm;intracellular non-membrane-bounded organelle;intracellular part;non-membrane-bounded organelle;nuclear part;nucleolus;nucleus	cofactor binding;vitamin binding	Glycine, serine and threonine metabolism
Q91XE0	Q91XE0	Glycine N-acyltransferase	Glyat	amine metabolic process;carboxylic acid metabolic process;cellular amine metabolic process;cellular amino acid metabolic process;cellular ketone metabolic process;cellular metabolic process;cellular nitrogen compound metabolic process;metabolic process;nitrogen compound metabolic process;organic acid metabolic process;oxoacid metabolic process;primary metabolic process;small molecule metabolic pr…	intracellular part;mitochondrion
Q91XH5;G3UXX3;Q64105;G3UZ79	Q91XH5;G3UXX3;Q64105	Sepiapterin reductase	Spr	amine metabolic process;biosynthetic process;carboxylic acid metabolic process;cellular amine metabolic process;cellular amino acid metabolic process;cellular biosynthetic process;cellular ketone metabolic process;cellular metabolic process;cellular nitrogen compound metabolic process;coenzyme metabolic process;cofactor metabolic process;metabolic process;nitrogen compound metabolic process;organ…	cytoplasm;intracellular part;mitochondrion;nuclear part;nucleoplasm
Q91YI0;E0CY49;F7D439;E0CYV3	Q91YI0;E0CY49	Argininosuccinate lyase	Asl	amine metabolic process;biosynthetic process;carboxylic acid metabolic process;cellular amine metabolic process;cellular amino acid biosynthetic process;cellular amino acid metabolic process;cellular biosynthetic process;cellular ketone metabolic process;cellular macromolecule metabolic process;cellular metabolic process;cellular nitrogen compound metabolic process;glutamine family amino acid met…			Alanine, aspartate and glutamate metabolism;Arginine and proline metabolism
Q99J39	Q99J39	Malonyl-CoA decarboxylase, mitochondrial	Mlycd	acetyl-CoA metabolic process;biosynthetic process;carboxylic acid metabolic process;cellular biosynthetic process;cellular ketone metabolic process;cellular metabolic process;coenzyme metabolic process;cofactor metabolic process;metabolic process;organic acid metabolic process;oxoacid metabolic process;primary metabolic process;small molecule metabolic process	cytoplasm;intracellular organelle lumen;intracellular part;mitochondrial matrix;mitochondrion;organelle lumen		Propanoate metabolism
Q99KI0	Q99KI0	Aconitate hydratase, mitochondrial	Aco2	acetyl-CoA metabolic process;carboxylic acid metabolic process;catabolic process;cellular catabolic process;cellular ketone metabolic process;cellular metabolic process;coenzyme metabolic process;cofactor metabolic process;metabolic process;organic acid metabolic process;oxoacid metabolic process;small molecule metabolic process	intracellular part;mitochondrion;nucleus		Citrate cycle (TCA cycle)
Q99L13	Q99L13	3-hydroxyisobutyrate dehydrogenase, mitochondrial	Hibadh	amine catabolic process;amine metabolic process;carboxylic acid catabolic process;carboxylic acid metabolic process;catabolic process;cellular amine metabolic process;cellular amino acid catabolic process;cellular amino acid metabolic process;cellular catabolic process;cellular ketone metabolic process;cellular metabolic process;cellular nitrogen compound metabolic process;coenzyme metabolic proc…	intracellular part;mitochondrion	cofactor binding	Valine, leucine and isoleucine degradation
Q99LC5	Q99LC5	Electron transfer flavoprotein subunit alpha, mitochondrial	Etfa		intracellular part;mitochondrion	cofactor binding
Q99LP6	Q99LP6	GrpE protein homolog 1, mitochondrial	Grpel1	cellular macromolecule metabolic process;cellular metabolic process;macromolecule metabolic process;metabolic process;primary metabolic process	intracellular organelle lumen;intracellular part;mitochondrial matrix;mitochondrion;organelle lumen
Q9CPX4;P29391;P49945	Q9CPX4;P29391;P49945	Ferritin;Ferritin light chain 1;Ferritin light chain 2	Ftl1;Ftl2		intracellular part;organelle lumen
Q9CR57	Q9CR57	60S ribosomal protein L14	Rpl14	biosynthetic process;cellular biosynthetic process;cellular macromolecule biosynthetic process;cellular macromolecule metabolic process;cellular metabolic process;cellular nitrogen compound metabolic process;macromolecule biosynthetic process;macromolecule metabolic process;metabolic process;nitrogen compound metabolic process;nucleobase-containing compound metabolic process;primary metabolic pro…	cytoplasm;cytosolic large ribosomal subunit;intracellular part;large ribosomal subunit;ribonucleoprotein complex	structural constituent of ribosome;structural molecule activity	Ribosome
Q9CRB3;A0A0A0MQC3	Q9CRB3;A0A0A0MQC3	5-hydroxyisourate hydrolase	Urah	catabolic process;cellular catabolic process;cellular metabolic process;cellular nitrogen compound metabolic process;metabolic process;nitrogen compound metabolic process;nucleobase-containing compound metabolic process;organic acid metabolic process;primary metabolic process;small molecule catabolic process;small molecule metabolic process	intracellular part;mitochondrion
Q9CXN7;D3Z2D7	Q9CXN7;D3Z2D7	Phenazine biosynthesis-like domain-containing protein 2	Pbld2;Pbld1	biosynthetic process;metabolic process	cytoplasm;intracellular part
Q9CXV1	Q9CXV1	Succinate dehydrogenase [ubiquinone] cytochrome b small subunit, mitochondrial	Sdhd	acetyl-CoA metabolic process;catabolic process;cellular catabolic process;cellular metabolic process;coenzyme metabolic process;cofactor metabolic process;metabolic process	intracellular part;mitochondrion	cofactor binding	Citrate cycle (TCA cycle)
Q9CZN7	Q9CZN7	Serine hydroxymethyltransferase	Shmt2	amine metabolic process;biosynthetic process;carboxylic acid metabolic process;cellular amine metabolic process;cellular amino acid biosynthetic process;cellular amino acid metabolic process;cellular biosynthetic process;cellular ketone metabolic process;cellular metabolic process;cellular nitrogen compound metabolic process;coenzyme metabolic process;cofactor metabolic process;metabolic process;…	intracellular non-membrane-bounded organelle;intracellular organelle lumen;intracellular part;mitochondrial matrix;mitochondrion;non-membrane-bounded organelle;organelle lumen	cofactor binding;vitamin binding	Glycine, serine and threonine metabolism
Q9CZS1;G3UYH1;G3UWP3;Q3UIA4;Q9JHW9;A0A140LIF9	Q9CZS1	Aldehyde dehydrogenase X, mitochondrial	Aldh1b1	biosynthetic process;carboxylic acid metabolic process;catabolic process;cellular biosynthetic process;cellular ketone metabolic process;cellular metabolic process;metabolic process;organic acid metabolic process;oxoacid metabolic process;primary metabolic process;small molecule catabolic process;small molecule metabolic process	cytoplasm;intracellular organelle lumen;intracellular part;mitochondrial matrix;mitochondrion;nuclear part;nucleoplasm;organelle lumen	cofactor binding	Arginine and proline metabolism;Propanoate metabolism;Valine, leucine and isoleucine degradation
Q9CZU6;Q80X68	Q9CZU6	Citrate synthase, mitochondrial	Cs	acetyl-CoA metabolic process;catabolic process;cellular catabolic process;cellular metabolic process;coenzyme metabolic process;cofactor metabolic process;metabolic process;primary metabolic process	intracellular organelle lumen;intracellular part;mitochondrial matrix;mitochondrion;nucleus;organelle lumen		Citrate cycle (TCA cycle)
Q9D1R9;A0A0G2JEY6;A0A0G2JGY8;D3YWC0	Q9D1R9;A0A0G2JEY6;A0A0G2JGY8	60S ribosomal protein L34	Rpl34	biosynthetic process;cellular biosynthetic process;cellular macromolecule biosynthetic process;cellular macromolecule metabolic process;cellular metabolic process;macromolecule biosynthetic process;macromolecule metabolic process;metabolic process;primary metabolic process;translation	intracellular non-membrane-bounded organelle;intracellular part;non-membrane-bounded organelle;ribonucleoprotein complex	structural constituent of ribosome;structural molecule activity	Ribosome
Q9D6M3;E9PY45;E9PV90;E9Q6M6;A0A0J9YTY6;V9GWS2;Q80X52;E9Q579;A0A0J9YUX4;Q9DB41;A0A0J9YUJ4;V9GWV4;A0A0J9YVJ3	Q9D6M3;E9PY45;E9PV90;E9Q6M6;A0A0J9YTY6	Mitochondrial glutamate carrier 1	Slc25a22		intracellular part;mitochondrion;nuclear part;nucleoplasm
Q9D6R2	Q9D6R2	Isocitrate dehydrogenase [NAD] subunit alpha, mitochondrial	Idh3a	acetyl-CoA metabolic process;catabolic process;cellular catabolic process;cellular metabolic process;coenzyme metabolic process;cofactor metabolic process;metabolic process	intracellular part;mitochondrion;nucleus	cofactor binding	Citrate cycle (TCA cycle)
Q9D7J9	Q9D7J9	Enoyl-CoA hydratase domain-containing protein 3, mitochondrial	Echdc3		intracellular part;mitochondrion
Q9DBA8	Q9DBA8	Probable imidazolonepropionase	Amdhd1	amine catabolic process;amine metabolic process;carboxylic acid catabolic process;carboxylic acid metabolic process;catabolic process;cellular amine metabolic process;cellular amino acid catabolic process;cellular amino acid metabolic process;cellular catabolic process;cellular ketone metabolic process;cellular metabolic process;cellular nitrogen compound metabolic process;glutamine family amino …	cytoplasm;intracellular part
Q9DBF1;G3UYR8;G3UY72;E9Q1H3;E9Q1G1	Q9DBF1;G3UYR8;G3UY72	Alpha-aminoadipic semialdehyde dehydrogenase	Aldh7a1	amine metabolic process;biosynthetic process;carboxylic acid metabolic process;cellular amine metabolic process;cellular amino acid biosynthetic process;cellular amino acid metabolic process;cellular biosynthetic process;cellular ketone metabolic process;cellular metabolic process;cellular nitrogen compound metabolic process;metabolic process;nitrogen compound metabolic process;organic acid metab…	cytoplasm;intracellular part;mitochondrion;nucleus		Arginine and proline metabolism;Glycine, serine and threonine metabolism;Propanoate metabolism;Valine, leucine and isoleucine degradation
Q9DBM2	Q9DBM2	Peroxisomal bifunctional enzyme;Enoyl-CoA hydratase/3,2-trans-enoyl-CoA isomerase;3-hydroxyacyl-CoA dehydrogenase	Ehhadh	carboxylic acid catabolic process;carboxylic acid metabolic process;catabolic process;cellular catabolic process;cellular ketone metabolic process;cellular macromolecule metabolic process;cellular metabolic process;coenzyme metabolic process;cofactor metabolic process;macromolecule metabolic process;metabolic process;organic acid catabolic process;organic acid metabolic process;oxoacid metabolic …	intracellular part;mitochondrion	cofactor binding	Propanoate metabolism;Valine, leucine and isoleucine degradation
Q9DBN5;REV__A8C756	Q9DBN5	Lon protease homolog 2, peroxisomal	Lonp2	macromolecule metabolic process;metabolic process;primary metabolic process	cytoplasm;intracellular organelle lumen;intracellular part;nucleus;organelle lumen
Q9DBT9	Q9DBT9	Dimethylglycine dehydrogenase, mitochondrial	Dmgdh	amine metabolic process;carboxylic acid metabolic process;catabolic process;cellular amine metabolic process;cellular amino acid metabolic process;cellular catabolic process;cellular ketone metabolic process;cellular metabolic process;cellular nitrogen compound metabolic process;metabolic process;nitrogen compound metabolic process;organic acid metabolic process;oxoacid metabolic process;primary …	intracellular part;mitochondrion		Glycine, serine and threonine metabolism
Q9DC50	Q9DC50	Peroxisomal carnitine O-octanoyltransferase	Crot	amine metabolic process;carboxylic acid catabolic process;carboxylic acid metabolic process;catabolic process;cellular amine metabolic process;cellular amino acid metabolic process;cellular catabolic process;cellular ketone metabolic process;cellular metabolic process;cellular nitrogen compound metabolic process;coenzyme metabolic process;cofactor metabolic process;metabolic process;nitrogen comp…	intracellular part;mitochondrion
Q9DCH4	Q9DCH4	Eukaryotic translation initiation factor 3 subunit F	Eif3f	cellular macromolecule metabolic process;cellular metabolic process;macromolecule metabolic process;metabolic process;primary metabolic process	intracellular part;ribonucleoprotein complex	nucleic acid binding;RNA binding
Q9DCL9;D3Z6P1	Q9DCL9	Multifunctional protein ADE2;Phosphoribosylaminoimidazole-succinocarboxamide synthase;Phosphoribosylaminoimidazole carboxylase	Paics	biosynthetic process;cellular biosynthetic process;cellular metabolic process;cellular nitrogen compound metabolic process;metabolic process;nitrogen compound metabolic process;nucleobase-containing compound metabolic process;primary metabolic process;small molecule metabolic process
Q9DCM2;A0A0N4SVE5	Q9DCM2	Glutathione S-transferase kappa 1	Gstk1	amine metabolic process;carboxylic acid metabolic process;cellular amine metabolic process;cellular amino acid metabolic process;cellular ketone metabolic process;cellular metabolic process;cellular nitrogen compound metabolic process;metabolic process;nitrogen compound metabolic process;organic acid metabolic process;oxoacid metabolic process;primary metabolic process;small molecule metabolic pr…	intracellular organelle lumen;intracellular part;mitochondrial matrix;mitochondrion;organelle lumen
Q9DCN1	Q9DCN1	Peroxisomal NADH pyrophosphatase NUDT12	Nudt12	catabolic process;cellular catabolic process;cellular metabolic process;cellular nitrogen compound metabolic process;coenzyme metabolic process;cofactor metabolic process;metabolic process;nitrogen compound metabolic process;nucleobase-containing compound metabolic process;primary metabolic process;small molecule metabolic process	cytoplasm;intracellular part;nucleus
Q9DCU9;E9Q1R2	Q9DCU9;E9Q1R2	4-hydroxy-2-oxoglutarate aldolase, mitochondrial	Hoga1	amine catabolic process;amine metabolic process;biosynthetic process;carboxylic acid catabolic process;carboxylic acid metabolic process;catabolic process;cellular amine metabolic process;cellular amino acid catabolic process;cellular amino acid metabolic process;cellular biosynthetic process;cellular catabolic process;cellular ketone metabolic process;cellular metabolic process;cellular nitrogen…	intracellular part;mitochondrion
Q9DCW4;A0A0U1RNP5;A0A0N4SVE0;A0A0U1RNR3;A0A0N4SWE9;A0A0U1RNK9;A0A0U1RQB4	Q9DCW4;A0A0U1RNP5;A0A0N4SVE0;A0A0U1RNR3;A0A0N4SWE9;A0A0U1RNK9	Electron transfer flavoprotein subunit beta	Etfb	metabolic process	intracellular part;mitochondrion
Q9DCX8	Q9DCX8	Iodotyrosine dehalogenase 1	Iyd
Q9EQ20	Q9EQ20	Methylmalonate-semialdehyde dehydrogenase [acylating], mitochondrial	Aldh6a1	amine catabolic process;amine metabolic process;carboxylic acid catabolic process;carboxylic acid metabolic process;catabolic process;cellular amine metabolic process;cellular amino acid catabolic process;cellular amino acid metabolic process;cellular catabolic process;cellular ketone metabolic process;cellular metabolic process;cellular nitrogen compound metabolic process;metabolic process;nitro…	intracellular part;mitochondrion;nuclear part;nucleoplasm		Propanoate metabolism;Valine, leucine and isoleucine degradation
Q9EQF5;F6ZLZ4	Q9EQF5	Dihydropyrimidinase	Dpys	amine metabolic process;carboxylic acid metabolic process;catabolic process;cellular amine metabolic process;cellular amino acid metabolic process;cellular catabolic process;cellular ketone metabolic process;cellular metabolic process;cellular nitrogen compound metabolic process;metabolic process;nitrogen compound metabolic process;nucleobase-containing compound metabolic process;organic acid met…	intracellular part
Q9ERS2	Q9ERS2	NADH dehydrogenase [ubiquinone] 1 alpha subcomplex subunit 13	Ndufa13	cellular metabolic process;metabolic process	cytoplasm;intracellular part;mitochondrion;nuclear part;nucleoplasm
Q9JHI5	Q9JHI5	Isovaleryl-CoA dehydrogenase, mitochondrial	Ivd	amine catabolic process;amine metabolic process;carboxylic acid catabolic process;carboxylic acid metabolic process;catabolic process;cellular amine metabolic process;cellular amino acid catabolic process;cellular amino acid metabolic process;cellular catabolic process;cellular ketone metabolic process;cellular metabolic process;cellular nitrogen compound metabolic process;metabolic process;nitro…	intracellular organelle lumen;intracellular part;mitochondrial matrix;mitochondrion;nuclear part;nucleoplasm;organelle lumen	cofactor binding	Valine, leucine and isoleucine degradation
Q9JLJ2;Q3U367	Q9JLJ2;Q3U367	4-trimethylaminobutyraldehyde dehydrogenase	Aldh9a1	amine metabolic process;biosynthetic process;carboxylic acid metabolic process;cellular amine metabolic process;cellular amino acid biosynthetic process;cellular amino acid metabolic process;cellular biosynthetic process;cellular ketone metabolic process;cellular metabolic process;cellular nitrogen compound metabolic process;metabolic process;nitrogen compound metabolic process;organic acid metab…	intracellular part;mitochondrion	cofactor binding	Arginine and proline metabolism;Propanoate metabolism;Valine, leucine and isoleucine degradation
Q9QXD6;F6YS63;E9Q0T7	Q9QXD6	Fructose-1,6-bisphosphatase 1	Fbp1	biosynthetic process;cellular biosynthetic process;cellular metabolic process;metabolic process;primary metabolic process;protein homotetramerization;small molecule metabolic process	cytoplasm;intracellular part
Q9QXF8	Q9QXF8	Glycine N-methyltransferase	Gnmt	amine metabolic process;carboxylic acid metabolic process;cellular amine metabolic process;cellular amino acid metabolic process;cellular ketone metabolic process;cellular macromolecule metabolic process;cellular metabolic process;cellular nitrogen compound metabolic process;coenzyme metabolic process;cofactor metabolic process;macromolecule metabolic process;metabolic process;nitrogen compound m…	cytoplasm;intracellular part	vitamin binding	Glycine, serine and threonine metabolism
Q9QYG0	Q9QYG0	Protein NDRG2	Ndrg2		cytoplasm;intracellular non-membrane-bounded organelle;intracellular part;non-membrane-bounded organelle;nuclear part;nucleoplasm;nucleus
Q9QYJ0	Q9QYJ0	DnaJ homolog subfamily A member 2	Dnaja2	cellular macromolecule metabolic process;cellular metabolic process;macromolecule metabolic process;metabolic process;primary metabolic process	intracellular part
Q9R1P3	Q9R1P3	Proteasome subunit beta type-2	Psmb2	catabolic process;cellular catabolic process;cellular macromolecule metabolic process;cellular metabolic process;macromolecule metabolic process;metabolic process;primary metabolic process	cytoplasm;intracellular part;nuclear part;nucleoplasm;nucleus
Q9WTP7;F6RP11	Q9WTP7	GTP:AMP phosphotransferase AK3, mitochondrial	Ak3	biosynthetic process;cellular biosynthetic process;cellular metabolic process;cellular nitrogen compound metabolic process;metabolic process;nitrogen compound metabolic process;nucleobase-containing compound metabolic process;primary metabolic process;small molecule metabolic process	intracellular organelle lumen;intracellular part;mitochondrial matrix;mitochondrion;organelle lumen
Q9Z1P6	Q9Z1P6	NADH dehydrogenase [ubiquinone] 1 alpha subcomplex subunit 7	Ndufa7	cellular metabolic process;metabolic process	intracellular part;mitochondrion
Q9Z2I8;A0A0N4SWD1	Q9Z2I8	Succinyl-CoA ligase [GDP-forming] subunit beta, mitochondrial	Suclg2	acetyl-CoA metabolic process;carboxylic acid metabolic process;catabolic process;cellular catabolic process;cellular ketone metabolic process;cellular metabolic process;coenzyme metabolic process;cofactor metabolic process;metabolic process;organic acid metabolic process;oxoacid metabolic process;small molecule metabolic process	intracellular part;mitochondrion		Citrate cycle (TCA cycle);Propanoate metabolism
Q9Z2I9	Q9Z2I9	Succinyl-CoA ligase [ADP-forming] subunit beta, mitochondrial	Sucla2	acetyl-CoA metabolic process;carboxylic acid metabolic process;catabolic process;cellular catabolic process;cellular ketone metabolic process;cellular metabolic process;coenzyme metabolic process;cofactor metabolic process;metabolic process;organic acid metabolic process;oxoacid metabolic process;small molecule metabolic process	intracellular part;mitochondrion		Citrate cycle (TCA cycle);Propanoate metabolism
Q9Z2V4;A0A0R4J0G0;Q8BH04	Q9Z2V4	Phosphoenolpyruvate carboxykinase, cytosolic [GTP]	Pck1	biosynthetic process;carboxylic acid metabolic process;cellular biosynthetic process;cellular ketone metabolic process;cellular macromolecule metabolic process;cellular metabolic process;cellular nitrogen compound metabolic process;coenzyme metabolic process;cofactor metabolic process;macromolecule metabolic process;metabolic process;nitrogen compound metabolic process;nucleobase-containing compo…	intracellular part;mitochondrion		Citrate cycle (TCA cycle)

## Sheet: cluster_B_enrichment
Cluster ID	Type	Name	P value	Enrichment	Total	In cluster	Cluster size	Benj. Hoch. FDR
439	GOCC name	membrane part	1.0367e-30	1.6539	173	145	224	4.8518e-28
439	GOCC name	intrinsic to membrane	6.6166e-23	1.7991	102	93	224	1.0322e-20
439	GOCC name	integral to membrane	6.6166e-23	1.7991	102	93	224	1.5483e-20
439	GOCC name	organelle membrane	3.4853e-14	1.4705	157	117	224	3.2622e-12
439	GOCC name	endoplasmic reticulum part	7.214e-12	1.7158	69	60	224	5.6269e-10
439	GOCC name	endoplasmic reticulum	5.5246e-11	1.8445	46	43	224	3.6936e-09
439	GOCC name	endoplasmic reticulum membrane	2.4682e-09	1.7174	54	47	224	1.2835e-07
439	GOCC name	plasma membrane part	5.8539e-08	1.6696	52	44	224	2.7396e-06
439	GOCC name	membrane	4.9455e-07	1.1915	260	157	224	2.1041e-05
439	GOMF name	transporter activity	1.4584e-06	1.7823	31	28	224	0.00026689
439	GOCC name	plasma membrane	1.8599e-05	1.4969	58	44	224	0.00054403
439	GOCC name	protein complex	4.6494e-05	1.3097	113	75	224	0.00128
439	GOCC name	endoplasmic reticulum lumen	5.9953e-05	1.9732	14	14	224	0.0015588
439	GOCC name	cell surface	9.2582e-05	1.7853	21	19	224	0.0021664
439	GOMF name	substrate-specific transporter activity	1.7872e-05	1.754	27	24	224	0.0023361
439	GOCC name	vacuolar part	0.00012526	1.8571	17	16	224	0.0025487
439	GOMF name	ion transmembrane transporter activity	1.7147e-05	1.8746	20	19	224	0.0026149
439	GOCC name	vacuolar membrane	0.00012526	1.8571	17	16	224	0.0026646
439	GOCC name	mitochondrial membrane part	0.00033121	1.6209	28	23	224	0.005536
439	GOBP name	membrane organization	3.2878e-05	1.7455	26	23	224	0.0057405
439	KEGG name	Oxidative phosphorylation	6.4811e-05	1.6913	28	24	224	0.0059626
439	GOMF name	transmembrane transporter activity	6.0041e-05	1.7364	25	22	224	0.0061041
439	KEGG name	Cardiac muscle contraction	0.00024724	1.9732	12	12	224	0.0090984
439	GOCC name	intrinsic to plasma membrane	0.00086719	1.8323	14	13	224	0.012683
439	GOCC name	integral to plasma membrane	0.00086719	1.8323	14	13	224	0.013092
439	GOCC name	cytoplasmic vesicle	0.0010291	1.4351	44	32	224	0.014595
439	GOBP name	cellular membrane organization	0.00010879	1.7266	24	21	224	0.015196
439	GOMF name	substrate-specific transmembrane transporter activity	0.00019552	1.7158	23	20	224	0.016264
439	GOCC name	cytoplasmic membrane-bounded vesicle	0.001273	1.4438	41	30	224	0.017022
439	KEGG name	Alzheimer's disease	0.00055895	1.6078	27	22	224	0.017141
439	GOMF name	transferase activity, transferring hexosyl groups	0.00024724	1.9732	12	12	224	0.017402
439	GOMF name	cation transmembrane transporter activity	0.00024029	1.8499	16	15	224	0.018322
439	KEGG name	Bile secretion	0.0010099	1.9732	10	10	224	0.018583
439	GOBP name	vesicle-mediated transport	0.00017159	1.7759	20	18	224	0.018725
439	GOCC name	membrane raft	0.0016295	1.8214	13	12	224	0.019554
439	GOCC name	lysosomal membrane	0.0016295	1.8214	13	12	224	0.020068
439	GOCC name	basolateral plasma membrane	0.0016295	1.8214	13	12	224	0.020611
439	GOCC name	apical plasma membrane	0.0016295	1.8214	13	12	224	0.021183
439	GOCC name	sarcolemma	0.0020339	1.9732	9	9	224	0.022664
439	GOBP name	response to chemical stimulus	0.0002908	1.2602	119	76	224	0.028207
439	GOBP name	transport	0.00032602	1.3232	85	57	224	0.029191
439	GOMF name	inorganic cation transmembrane transporter activity	0.00045805	1.8417	15	14	224	0.029937
439	GOBP name	establishment of localization	0.00032602	1.3232	85	57	224	0.02996
439	KEGG name	Parkinson's disease	0.0021505	1.5347	27	21	224	0.035971
439	GOBP name	transmembrane transport	0.00045805	1.8417	15	14	224	0.038084
439	GOBP name	divalent inorganic cation homeostasis	0.00050028	1.9732	11	11	224	0.039704

## Sheet: cluster_B_enrichment_members
Protein IDs	Majority protein IDs	Protein names	Gene names	GOBP name	GOCC name	GOMF name	KEGG name
J3QQ16;A0A087WS16;E9PWQ3;D3YWD1	J3QQ16;A0A087WS16;E9PWQ3;D3YWD1		Col6a3		membrane;plasma membrane;sarcolemma
A0A0N4SUN2;Q9JJL3	A0A0N4SUN2;Q9JJL3	Solute carrier organic anion transporter family member 1B2	Slco1b2	response to chemical stimulus	basolateral plasma membrane;integral to membrane;integral to plasma membrane;intrinsic to membrane;intrinsic to plasma membrane;membrane;membrane part;plasma membrane;plasma membrane part	ion transmembrane transporter activity;substrate-specific transmembrane transporter activity;substrate-specific transporter activity;transmembrane transporter activity;transporter activity	Bile secretion
A0A0N4SVT3;A0A0N4SW28;Q9DAS9	A0A0N4SVT3;A0A0N4SW28;Q9DAS9	Guanine nucleotide-binding protein G(I)/G(S)/G(O) subunit gamma-12	Gng12	response to chemical stimulus	membrane part;plasma membrane part;protein complex
A0A0R4IZY2;Q8CIM7;Q6P8N9	A0A0R4IZY2;Q8CIM7	Cytochrome P450 2D26	Cyp2d26		endoplasmic reticulum membrane;endoplasmic reticulum part;membrane;membrane part;organelle membrane
S4R2E1;A0A0R4J0B6;Q7TMS5;D3YZX5;S4R2M4;A0A0N4SWA2;D3Z150;D3YVG8	S4R2E1;A0A0R4J0B6;Q7TMS5	ATP-binding cassette sub-family G member 2	Abcg2	establishment of localization;response to chemical stimulus;transport	apical plasma membrane;integral to membrane;intrinsic to membrane;membrane;membrane part;organelle membrane;plasma membrane;plasma membrane part	transmembrane transporter activity;transporter activity	Bile secretion
A0A0R4J0I1;P07759;Q03734;E9Q499;F2Z405;G3X8T9;P29621;Q91WP6;Q5I2A0;Q80X76	A0A0R4J0I1;P07759	Serine protease inhibitor A3K	Serpina3k	response to chemical stimulus
A0A0R4J0I9;Q91ZX7;Q3U5J2	A0A0R4J0I9;Q91ZX7	Prolow-density lipoprotein receptor-related protein 1;Low-density lipoprotein receptor-related protein 1 85 kDa subunit;Low-density lipoprotein receptor-related protein 1 515 kDa subunit;Low-density lipoprotein receptor-related protein 1 intracellular domain	Lrp1	cellular membrane organization;establishment of localization;membrane organization;transport;vesicle-mediated transport	cytoplasmic membrane-bounded vesicle;cytoplasmic vesicle;integral to membrane;integral to plasma membrane;intrinsic to membrane;intrinsic to plasma membrane;lysosomal membrane;membrane;membrane part;organelle membrane;plasma membrane part;protein complex;vacuolar membrane;vacuolar part		Alzheimer's disease
A0A0R4J0Z1;P08003	A0A0R4J0Z1;P08003	Protein disulfide-isomerase A4	Pdia4		cell surface;cytoplasmic membrane-bounded vesicle;cytoplasmic vesicle;endoplasmic reticulum;endoplasmic reticulum lumen;endoplasmic reticulum part;protein complex
G3X9S2;A0A0R4J1Q7;P06802;E9QQ26	G3X9S2;A0A0R4J1Q7;P06802	Ectonucleotide pyrophosphatase/phosphodiesterase family member 1;Alkaline phosphodiesterase I;Nucleotide pyrophosphatase	Enpp1	establishment of localization;response to chemical stimulus;transport	basolateral plasma membrane;cell surface;integral to membrane;integral to plasma membrane;intrinsic to membrane;intrinsic to plasma membrane;lysosomal membrane;membrane;membrane part;organelle membrane;plasma membrane;plasma membrane part;vacuolar membrane;vacuolar part
A2ACG7;Q9DBG6	A2ACG7;Q9DBG6	Dolichyl-diphosphooligosaccharide--protein glycosyltransferase subunit 2	Rpn2	response to chemical stimulus	endoplasmic reticulum;endoplasmic reticulum part;integral to membrane;intrinsic to membrane;membrane;membrane part;organelle membrane;protein complex;vacuolar membrane;vacuolar part
A2AP31;Q3UIU2;A2AP32	A2AP31;Q3UIU2;A2AP32	NADH dehydrogenase [ubiquinone] 1 beta subcomplex subunit 6	Ndufb6		integral to membrane;intrinsic to membrane;membrane;membrane part;mitochondrial membrane part;organelle membrane;protein complex		Alzheimer's disease;Oxidative phosphorylation;Parkinson's disease
A2RSV8;P19783;M0QWX7;D6RG40	A2RSV8;P19783	Cytochrome c oxidase subunit 4 isoform 1, mitochondrial	Cox4i1	response to chemical stimulus	membrane;organelle membrane	cation transmembrane transporter activity;inorganic cation transmembrane transporter activity;ion transmembrane transporter activity;substrate-specific transmembrane transporter activity;substrate-specific transporter activity;transmembrane transporter activity;transporter activity	Alzheimer's disease;Cardiac muscle contraction;Oxidative phosphorylation;Parkinson's disease
B1ARW4;Q99LY9	B1ARW4;Q99LY9	NADH dehydrogenase [ubiquinone] iron-sulfur protein 5;NADH dehydrogenase [ubiquinone] iron-sulfur protein 5, N-terminally processed	Ndufs5		membrane;membrane part;organelle membrane		Alzheimer's disease;Oxidative phosphorylation;Parkinson's disease
B1AV77;B1ATI0;P47740;A0A140LJF9;P47739	B1AV77;B1ATI0;P47740	Aldehyde dehydrogenase;Fatty aldehyde dehydrogenase	Aldh3a2	response to chemical stimulus	endoplasmic reticulum;endoplasmic reticulum membrane;endoplasmic reticulum part;integral to membrane;intrinsic to membrane;membrane;membrane part;organelle membrane;plasma membrane
B1AU25;Q9Z0X1	B1AU25;Q9Z0X1	Apoptosis-inducing factor 1, mitochondrial	Aifm1	response to chemical stimulus	membrane;organelle membrane
B2MWM9;P14211	B2MWM9;P14211	Calreticulin	Calr	establishment of localization;response to chemical stimulus;transport	cytoplasmic membrane-bounded vesicle;cytoplasmic vesicle;endoplasmic reticulum;endoplasmic reticulum lumen;endoplasmic reticulum part;membrane;membrane part;plasma membrane part;protein complex
B2RSR0;Q9DBW0;H9H9R5	B2RSR0;Q9DBW0	Cytochrome P450 4V2	Cyp4v3;Cyp4v2		endoplasmic reticulum membrane;endoplasmic reticulum part;integral to membrane;intrinsic to membrane;membrane;membrane part;organelle membrane
B2RWI2;Q9EP89	B2RWI2;Q9EP89	Serine beta-lactamase-like protein LACTB, mitochondrial	Lactb
B6VGH4;P00186	B6VGH4;P00186	Cytochrome P450;Cytochrome P450 1A2	Cyp1a2	response to chemical stimulus	endoplasmic reticulum membrane;endoplasmic reticulum part;membrane;membrane part;organelle membrane
B9EHY2;Q80W54;I7HIP5	B9EHY2;Q80W54	CAAX prenyl protease 1 homolog	Zmpste24	cellular membrane organization;membrane organization	endoplasmic reticulum membrane;endoplasmic reticulum part;integral to membrane;intrinsic to membrane;membrane;membrane part;organelle membrane
D3YWT0;D3Z569;D3YTS1;Q9R0P6	D3YWT0;D3Z569;D3YTS1;Q9R0P6	Signal peptidase complex catalytic subunit SEC11;Signal peptidase complex catalytic subunit SEC11A	Sec11a		endoplasmic reticulum membrane;endoplasmic reticulum part;integral to membrane;intrinsic to membrane;membrane;membrane part;organelle membrane
D3YUM1;Q91YT0;D3Z1U9;D3Z0K1;D3YXX5;D6RG60	D3YUM1;Q91YT0;D3Z1U9	NADH dehydrogenase [ubiquinone] flavoprotein 1, mitochondrial	Ndufv1		membrane;membrane part;mitochondrial membrane part;organelle membrane;protein complex		Alzheimer's disease;Oxidative phosphorylation;Parkinson's disease
D3YVV1;Q8VEK0;Q0VEI2;Q8BHG3	D3YVV1;Q8VEK0	Cell cycle control protein 50A	Tmem30a	cellular membrane organization;establishment of localization;membrane organization;transmembrane transport;transport	apical plasma membrane;endoplasmic reticulum;integral to membrane;intrinsic to membrane;membrane;membrane part;organelle membrane;plasma membrane;plasma membrane part
E9Q3B9;D3YYS6;O35678;Q3UFN1	E9Q3B9;D3YYS6;O35678;Q3UFN1	Monoglyceride lipase	Mgll		membrane part
E9Q7G1;D3YZZ5	E9Q7G1;D3YZZ5		Tmed7	establishment of localization;transport	endoplasmic reticulum;integral to membrane;intrinsic to membrane;membrane part
D3Z041;P41216;D3Z457;D3YVF6;F6WNZ2	D3Z041;P41216	Long-chain-fatty-acid--CoA ligase 1	Acsl1	response to chemical stimulus	endoplasmic reticulum;endoplasmic reticulum membrane;endoplasmic reticulum part;integral to membrane;intrinsic to membrane;membrane;membrane part;organelle membrane;plasma membrane
D3Z1M3;Q6ZQI3	D3Z1M3;Q6ZQI3	Malectin	Mlec		endoplasmic reticulum;endoplasmic reticulum membrane;endoplasmic reticulum part;integral to membrane;intrinsic to membrane;membrane;membrane part;organelle membrane
D3Z2H7;E9Q986;D3Z7H6;E9Q906;E9Q907;E9Q905;E9Q8Z4;E9Q8Z9;D3Z2H2;E9Q903;E9Q901;E9Q904;G3X9V2;E9Q8Z5;E9Q8Z6;E9Q8Z8;P30999	D3Z2H7;E9Q986;D3Z7H6;E9Q906;E9Q907;E9Q905;E9Q8Z4;E9Q8Z9;D3Z2H2;E9Q903;E9Q901;E9Q904;G3X9V2;E9Q8Z5;E9Q8Z6;E9Q8Z8;P30999	Catenin delta-1	Ctnnd1		membrane;plasma membrane
D3Z2V4;Q4FK30;Q61009;F7C5U2	D3Z2V4;Q4FK30;Q61009	Scavenger receptor class B member 1	Scarb1	cellular membrane organization;establishment of localization;membrane organization;response to chemical stimulus;transmembrane transport;transport;vesicle-mediated transport	cell surface;integral to membrane;integral to plasma membrane;intrinsic to membrane;intrinsic to plasma membrane;lysosomal membrane;membrane;membrane part;membrane raft;organelle membrane;plasma membrane;plasma membrane part;vacuolar membrane;vacuolar part		Bile secretion
E0CX98;Q9D2C7;E0CZE8;E0CXR0	E0CX98;Q9D2C7;E0CZE8;E0CXR0	Bax inhibitor 1	Tmbim6	divalent inorganic cation homeostasis;response to chemical stimulus	endoplasmic reticulum;endoplasmic reticulum membrane;endoplasmic reticulum part;integral to membrane;intrinsic to membrane;membrane;membrane part;organelle membrane
E0CXB5;F6TFF2;Q8R143	E0CXB5;F6TFF2;Q8R143	Pituitary tumor-transforming gene 1 protein-interacting protein	Pttg1ip	establishment of localization;transport	integral to membrane;intrinsic to membrane;membrane;membrane part;plasma membrane
E9Q035;F7BAE9;P47758;E9Q2Q7;D3YYR8;F7CJN9;E9Q939;CON__Q2HJF0	E9Q035		Gm20425	establishment of localization;transport	apical plasma membrane;cell surface;cytoplasmic membrane-bounded vesicle;cytoplasmic vesicle;endoplasmic reticulum membrane;endoplasmic reticulum part;integral to membrane;intrinsic to membrane;membrane;membrane part;organelle membrane;plasma membrane part;protein complex
E9Q4G8;E9Q3Q6;Q54AJ5;Q61490;F6QH25;Q5MPX5	E9Q4G8;E9Q3Q6;Q54AJ5;Q61490	CD166 antigen	Alcam	response to chemical stimulus	integral to membrane;intrinsic to membrane;membrane part;plasma membrane part
E9QNH6;E9Q580;Q7TQD7;P46735;D3YV80;E9PVB9;A0A0J9YUC4;E9PWM9;Q9D6A1;O88329	E9QNH6;E9Q580;Q7TQD7;P46735	Unconventional myosin-Ib	Myo1b	establishment of localization;transport;vesicle-mediated transport	apical plasma membrane;basolateral plasma membrane;membrane;membrane part;organelle membrane;plasma membrane;plasma membrane part;protein complex
E9QKK8;F6Q8D3;Q9QZW0;E9Q3G7;P98197;F6Z4J2;Q6DFW5;D6RII8;A0A0G2JE89	E9QKK8;F6Q8D3;Q9QZW0	Phospholipid-transporting ATPase;Phospholipid-transporting ATPase 11C	Atp11c	cellular membrane organization;establishment of localization;membrane organization;transport	endoplasmic reticulum;endoplasmic reticulum membrane;endoplasmic reticulum part;integral to membrane;intrinsic to membrane;lysosomal membrane;membrane;membrane part;organelle membrane;plasma membrane;vacuolar membrane;vacuolar part	substrate-specific transporter activity;transporter activity
E9QPE7;O08638	E9QPE7;O08638	Myosin-11	Myh11		cytoplasmic membrane-bounded vesicle;cytoplasmic vesicle;protein complex
E9QPX3;Q9CXZ1	E9QPX3;Q9CXZ1	NADH dehydrogenase [ubiquinone] iron-sulfur protein 4, mitochondrial	Ndufs4	response to chemical stimulus	membrane part;mitochondrial membrane part;protein complex		Alzheimer's disease;Oxidative phosphorylation;Parkinson's disease
S4R1E5;F7A8H6;O70325;Q91XR9	S4R1E5;F7A8H6;O70325;Q91XR9	Glutathione peroxidase;Phospholipid hydroperoxide glutathione peroxidase, mitochondrial;Phospholipid hydroperoxide glutathione peroxidase, nuclear	Gpx4	response to chemical stimulus	membrane;organelle membrane
F7C846;P47802;G3XA66;D3Z3F4;G3XA75;D3YVW0;G3UYJ5;G3UXX9;G3UXB5	F7C846;P47802;G3XA66;D3Z3F4;G3XA75;D3YVW0;G3UYJ5;G3UXX9	Metaxin-1	Mtx1	establishment of localization;transport	integral to membrane;intrinsic to membrane;membrane;membrane part;organelle membrane
G3UXG7;G3UZJ5;P67871;G3UZA4;G3UXU2;G3UZX4	G3UXG7;G3UZJ5;P67871;G3UZA4;G3UXU2;G3UZX4	Casein kinase II subunit beta	Csnk2b	response to chemical stimulus	membrane;plasma membrane;protein complex
G3X9V0;Q5SVP3;P97372;E0CZ90	G3X9V0;Q5SVP3;P97372;E0CZ90	Proteasome activator complex subunit 2	Psme2;PSME2b		protein complex
G5E814;Q9D8B4	G5E814;Q9D8B4	NADH dehydrogenase [ubiquinone] 1 alpha subcomplex subunit 11	Ndufa11		integral to membrane;intrinsic to membrane;membrane part;mitochondrial membrane part;protein complex		Alzheimer's disease;Oxidative phosphorylation;Parkinson's disease
G5E850;Q544Z9;P56395;E0CY88	G5E850;Q544Z9;P56395	Cytochrome b5	Cyb5a		endoplasmic reticulum membrane;endoplasmic reticulum part;integral to membrane;intrinsic to membrane;membrane;membrane part;organelle membrane
K3W4R2;Q6URW6;A0A140LI60;A0A140LHX1	K3W4R2;Q6URW6	Myosin-14	Myh14		membrane;protein complex
O08601	O08601	Microsomal triglyceride transfer protein large subunit	Mttp	establishment of localization;response to chemical stimulus;transport	basolateral plasma membrane;endoplasmic reticulum;membrane part;plasma membrane part;protein complex	substrate-specific transporter activity;transporter activity
O08966	O08966	Solute carrier family 22 member 1	Slc22a1	establishment of localization;transmembrane transport;transport	basolateral plasma membrane;integral to membrane;integral to plasma membrane;intrinsic to membrane;intrinsic to plasma membrane;membrane part;plasma membrane part	cation transmembrane transporter activity;inorganic cation transmembrane transporter activity;ion transmembrane transporter activity;substrate-specific transmembrane transporter activity;substrate-specific transporter activity;transmembrane transporter activity;transporter activity	Bile secretion
O35114	O35114	Lysosome membrane protein 2	Scarb2	establishment of localization;transport	integral to membrane;intrinsic to membrane;lysosomal membrane;membrane;membrane part;organelle membrane;vacuolar membrane;vacuolar part
Q3V235;O35129;F6QPR1;F6Q8V7	Q3V235;O35129;F6QPR1	Prohibitin-2	Phb2		cell surface;membrane;organelle membrane;protein complex
O35488;A2ANX6	O35488;A2ANX6	Very long-chain acyl-CoA synthetase	Slc27a2	establishment of localization;transport	endoplasmic reticulum;endoplasmic reticulum lumen;endoplasmic reticulum membrane;endoplasmic reticulum part;integral to membrane;intrinsic to membrane;membrane;membrane part;organelle membrane	substrate-specific transporter activity;transporter activity
O35593	O35593	26S proteasome non-ATPase regulatory subunit 14	Psmd14		protein complex
O54734	O54734	Dolichyl-diphosphooligosaccharide--protein glycosyltransferase 48 kDa subunit	Ddost	response to chemical stimulus	endoplasmic reticulum;endoplasmic reticulum part;integral to membrane;intrinsic to membrane;membrane;membrane part;protein complex	transferase activity, transferring hexosyl groups
Q3TXU8;O55022	Q3TXU8;O55022	Membrane-associated progesterone receptor component 1	Pgrmc1	response to chemical stimulus	endoplasmic reticulum;endoplasmic reticulum membrane;endoplasmic reticulum part;integral to membrane;intrinsic to membrane;membrane;membrane part;organelle membrane
Q5SVF7;O55125;Q5SVG6	Q5SVF7;O55125	Protein NipSnap homolog 1	Nipsnap1		membrane;organelle membrane
O88441	O88441	Metaxin-2	Mtx2	establishment of localization;transport	membrane;organelle membrane
O88451	O88451	Retinol dehydrogenase 7	Rdh7		endoplasmic reticulum
Q3U6J9;O88531;B1B0P8;B1B0P9	Q3U6J9;O88531	Palmitoyl-protein thioesterase 1	Ppt1	cellular membrane organization;establishment of localization;membrane organization;transport;vesicle-mediated transport	cytoplasmic membrane-bounded vesicle;cytoplasmic vesicle;membrane;membrane part;membrane raft
O88587;D3Z227	O88587	Catechol O-methyltransferase	Comt	response to chemical stimulus	integral to membrane;intrinsic to membrane;membrane;membrane part
O88833;A2A977;A2A8T1;F8WGU9;A2A8S9;Q91WU1;A2A8S8	O88833;A2A977;A2A8T1	Cytochrome P450 4A10	Cyp4a10;Cyp4a32		apical plasma membrane;endoplasmic reticulum membrane;endoplasmic reticulum part;membrane;membrane part;organelle membrane;plasma membrane part
O89023	O89023	Tripeptidyl-peptidase 1	Tpp1		cytoplasmic membrane-bounded vesicle;cytoplasmic vesicle
Q7JCZ1;P00405	Q7JCZ1;P00405	Cytochrome c oxidase subunit 2	mt-Co2;Mtco2		integral to membrane;intrinsic to membrane;membrane;membrane part;organelle membrane;protein complex	cation transmembrane transporter activity;inorganic cation transmembrane transporter activity;ion transmembrane transporter activity;substrate-specific transmembrane transporter activity;substrate-specific transporter activity;transmembrane transporter activity;transporter activity	Alzheimer's disease;Cardiac muscle contraction;Oxidative phosphorylation;Parkinson's disease
P06801;Q3TQP6	P06801;Q3TQP6	NADP-dependent malic enzyme;Malic enzyme	Me1	response to chemical stimulus
Q542G9;P07356;B0V2N7;B0V2N8;B0V2N5	Q542G9;P07356;B0V2N7;B0V2N8;B0V2N5	Annexin;Annexin A2	Anxa2	cellular membrane organization;establishment of localization;membrane organization;transport	basolateral plasma membrane;cell surface;cytoplasmic membrane-bounded vesicle;cytoplasmic vesicle;lysosomal membrane;membrane;membrane part;membrane raft;organelle membrane;plasma membrane;plasma membrane part;protein complex;sarcolemma;vacuolar membrane;vacuolar part
Q3UAD6;P08113;F7C312	Q3UAD6;P08113;F7C312	Endoplasmin	Hsp90b1	response to chemical stimulus	cytoplasmic membrane-bounded vesicle;cytoplasmic vesicle;endoplasmic reticulum;endoplasmic reticulum lumen;endoplasmic reticulum membrane;endoplasmic reticulum part;membrane;membrane part;organelle membrane;plasma membrane;protein complex
P09055	P09055	Integrin beta-1	Itgb1	cellular membrane organization;divalent inorganic cation homeostasis;establishment of localization;membrane organization;response to chemical stimulus;transport	cell surface;cytoplasmic membrane-bounded vesicle;cytoplasmic vesicle;membrane;membrane part;membrane raft;plasma membrane;plasma membrane part;protein complex;sarcolemma
Q3TA96;P11438	Q3TA96;P11438	Lysosome-associated membrane glycoprotein 1	Lamp1	establishment of localization;transport;vesicle-mediated transport	cell surface;cytoplasmic membrane-bounded vesicle;cytoplasmic vesicle;integral to membrane;intrinsic to membrane;membrane;membrane part;organelle membrane;plasma membrane;plasma membrane part;sarcolemma
P11714	P11714	Cytochrome P450 2D9	Cyp2d9		endoplasmic reticulum membrane;endoplasmic reticulum part;membrane;membrane part;organelle membrane
Q3V2F7;P12710	Q3V2F7;P12710	Fatty acid-binding protein, liver	Fabp1	response to chemical stimulus		substrate-specific transporter activity;transporter activity
P12815	P12815	Programmed cell death protein 6	Pdcd6	establishment of localization;response to chemical stimulus;transport	cytoplasmic vesicle;endoplasmic reticulum;endoplasmic reticulum membrane;endoplasmic reticulum part;membrane;membrane part;organelle membrane
Q545P0;P14094;A0A0A6YX05	Q545P0;P14094	Sodium/potassium-transporting ATPase subunit beta-1	Atp1b1	cellular membrane organization;divalent inorganic cation homeostasis;establishment of localization;membrane organization;response to chemical stimulus;transmembrane transport;transport	apical plasma membrane;basolateral plasma membrane;membrane;membrane part;membrane raft;plasma membrane;plasma membrane part;protein complex;sarcolemma	cation transmembrane transporter activity;inorganic cation transmembrane transporter activity;ion transmembrane transporter activity;substrate-specific transmembrane transporter activity;substrate-specific transporter activity;transmembrane transporter activity;transporter activity	Bile secretion;Cardiac muscle contraction
P14246;E9PXR7	P14246	Solute carrier family 2, facilitated glucose transporter member 2	Slc2a2	establishment of localization;transport	integral to membrane;integral to plasma membrane;intrinsic to membrane;intrinsic to plasma membrane;membrane;membrane part;plasma membrane;plasma membrane part	cation transmembrane transporter activity;ion transmembrane transporter activity;substrate-specific transmembrane transporter activity;substrate-specific transporter activity;transmembrane transporter activity;transporter activity
P14824;F8WIT2	P14824;F8WIT2	Annexin A6;Annexin	Anxa6	divalent inorganic cation homeostasis;establishment of localization;transmembrane transport;transport	cytoplasmic membrane-bounded vesicle;cytoplasmic vesicle;lysosomal membrane;membrane;organelle membrane;vacuolar membrane;vacuolar part	ion transmembrane transporter activity;substrate-specific transmembrane transporter activity;substrate-specific transporter activity;transmembrane transporter activity;transporter activity
P15105;D3YVK1;D3Z121	P15105	Glutamine synthetase	Glul	response to chemical stimulus	endoplasmic reticulum;protein complex
Q52JJ6;P16406;F7B9G4;F6YHW2	Q52JJ6;P16406;F7B9G4	Glutamyl aminopeptidase	Enpep		apical plasma membrane;cytoplasmic vesicle;integral to membrane;intrinsic to membrane;lysosomal membrane;membrane;membrane part;organelle membrane;plasma membrane;plasma membrane part;vacuolar membrane;vacuolar part
Q3UCD9;P18242;F6Y6L6;F8WIR1	Q3UCD9;P18242;F6Y6L6;F8WIR1	Cathepsin D	Ctsd		cytoplasmic membrane-bounded vesicle;cytoplasmic vesicle
P19157;P46425;Q8VC73;F6RWR5	P19157;P46425	Glutathione S-transferase P 1;Glutathione S-transferase P 2	Gstp1;Gstp2	response to chemical stimulus	membrane;plasma membrane;protein complex
Q9D881;P19536;F7C106;A0A0A6YVR0	Q9D881;P19536	Cytochrome c oxidase subunit 5B, mitochondrial	Cox5b		membrane;organelle membrane	cation transmembrane transporter activity;inorganic cation transmembrane transporter activity;ion transmembrane transporter activity;substrate-specific transmembrane transporter activity;substrate-specific transporter activity;transmembrane transporter activity;transporter activity	Alzheimer's disease;Cardiac muscle contraction;Oxidative phosphorylation;Parkinson's disease
P20029	P20029	78 kDa glucose-regulated protein	Hspa5	response to chemical stimulus	cell surface;cytoplasmic membrane-bounded vesicle;cytoplasmic vesicle;endoplasmic reticulum;endoplasmic reticulum lumen;endoplasmic reticulum membrane;endoplasmic reticulum part;integral to membrane;intrinsic to membrane;membrane;membrane part;organelle membrane;plasma membrane;protein complex
Q544X6;P22315	Q544X6;P22315	Ferrochelatase;Ferrochelatase, mitochondrial	Fech	response to chemical stimulus	membrane;organelle membrane
Q9DCY1;P24369	Q9DCY1;P24369	Peptidyl-prolyl cis-trans isomerase;Peptidyl-prolyl cis-trans isomerase B	Ppib		cytoplasmic membrane-bounded vesicle;cytoplasmic vesicle;endoplasmic reticulum;endoplasmic reticulum lumen;endoplasmic reticulum part;membrane;protein complex
P24456	P24456	Cytochrome P450 2D10	Cyp2d10		endoplasmic reticulum membrane;endoplasmic reticulum part;membrane;membrane part;organelle membrane
P27773;F6Q404	P27773	Protein disulfide-isomerase A3	Pdia3		cell surface;cytoplasmic membrane-bounded vesicle;cytoplasmic vesicle;endoplasmic reticulum;endoplasmic reticulum lumen;endoplasmic reticulum part
Q3UKR1;P28654	Q3UKR1;P28654	Decorin	Dcn	response to chemical stimulus
P33267;A0A0U1RPL9	P33267;A0A0U1RPL9	Cytochrome P450 2F2	Cyp2f2	response to chemical stimulus	endoplasmic reticulum membrane;endoplasmic reticulum part;membrane;membrane part;organelle membrane
P34927;J3QPT6;B1AR34;REV__F2Z4A3	P34927;J3QPT6;B1AR34	Asialoglycoprotein receptor 1	Asgr1		integral to membrane;intrinsic to membrane;membrane part
Q5SUC3;P35564	Q5SUC3;P35564	Calnexin	Canx	cellular membrane organization;establishment of localization;membrane organization;transport;vesicle-mediated transport	cytoplasmic membrane-bounded vesicle;cytoplasmic vesicle;endoplasmic reticulum;endoplasmic reticulum membrane;endoplasmic reticulum part;integral to membrane;intrinsic to membrane;membrane;membrane part;mitochondrial membrane part;organelle membrane;protein complex
P48771	P48771	Cytochrome c oxidase subunit 7A2, mitochondrial	Cox7a2		membrane;membrane part;mitochondrial membrane part;organelle membrane	cation transmembrane transporter activity;inorganic cation transmembrane transporter activity;ion transmembrane transporter activity;substrate-specific transmembrane transporter activity;substrate-specific transporter activity;transmembrane transporter activity;transporter activity	Alzheimer's disease;Cardiac muscle contraction;Oxidative phosphorylation;Parkinson's disease
P50544;B1AR28	P50544;B1AR28	Very long-chain specific acyl-CoA dehydrogenase, mitochondrial	Acadvl		membrane;organelle membrane
P51863	P51863	V-type proton ATPase subunit d 1	Atp6v0d1	establishment of localization;transmembrane transport;transport	apical plasma membrane;cytoplasmic membrane-bounded vesicle;cytoplasmic vesicle;lysosomal membrane;membrane;membrane part;organelle membrane;plasma membrane part;protein complex;vacuolar membrane;vacuolar part	cation transmembrane transporter activity;inorganic cation transmembrane transporter activity;ion transmembrane transporter activity;substrate-specific transmembrane transporter activity;substrate-specific transporter activity;transmembrane transporter activity;transporter activity	Oxidative phosphorylation
P52430;H3BK03;H3BLB8	P52430;H3BK03	Serum paraoxonase/arylesterase 1	Pon1	response to chemical stimulus
P52825;A2A8E8;A2A8E7;A2A8E9	P52825	Carnitine O-palmitoyltransferase 2, mitochondrial	Cpt2	establishment of localization;transport	membrane;organelle membrane
Q8JZZ5;P53811	Q8JZZ5;P53811	Phosphatidylinositol transfer protein beta isoform	Pitpnb	establishment of localization;transport
P58710	P58710	L-gulonolactone oxidase	Gulo		endoplasmic reticulum membrane;endoplasmic reticulum part;integral to membrane;intrinsic to membrane;membrane;membrane part;organelle membrane
P60766;G3UZM2;D3Z3L1;F2Z463;D3YX61;Q3UDZ1;P84096;Q8R527;Q9ER71	P60766	Cell division control protein 42 homolog	Cdc42	cellular membrane organization;establishment of localization;membrane organization;response to chemical stimulus;transport;vesicle-mediated transport	cytoplasmic membrane-bounded vesicle;cytoplasmic vesicle;membrane;membrane part;membrane raft;organelle membrane;plasma membrane;plasma membrane part;protein complex
Q14BR4;P61750;E9Q798;F6UFB9	Q14BR4;P61750;E9Q798	ADP-ribosylation factor 4	Arf4	establishment of localization;transport;vesicle-mediated transport	membrane;membrane part;plasma membrane;plasma membrane part
P61804	P61804	Dolichyl-diphosphooligosaccharide--protein glycosyltransferase subunit DAD1	Dad1	response to chemical stimulus	endoplasmic reticulum part;integral to membrane;intrinsic to membrane;membrane;membrane part;protein complex	transferase activity, transferring hexosyl groups
Q3U9V4;P62880;D3Z1M1;D3YZX3;E9QKR0;D3Z1T4;P29387;E9PWM7;A0A0A6YVN9;V9GWY1	Q3U9V4;P62880;D3Z1M1;D3YZX3;E9QKR0;D3Z1T4;P29387	Guanine nucleotide-binding protein G(I)/G(S)/G(T) subunit beta-2;Guanine nucleotide-binding protein subunit beta-4	Gnb2;Gnb4		lysosomal membrane;membrane;membrane part;organelle membrane;plasma membrane part;protein complex;vacuolar membrane;vacuolar part
P67778;Q5SQG5	P67778;Q5SQG5	Prohibitin	Phb	response to chemical stimulus	cell surface;integral to membrane;integral to plasma membrane;intrinsic to membrane;intrinsic to plasma membrane;membrane;membrane part;mitochondrial membrane part;organelle membrane;plasma membrane part
Q542X7;P80314	Q542X7;P80314	T-complex protein 1 subunit beta	Cct2		protein complex
P80317;Q497N0;Q61390;B1AT05	P80317	T-complex protein 1 subunit zeta	Cct6a		cytoplasmic membrane-bounded vesicle;cytoplasmic vesicle;protein complex
P84084;D3YV25;E9Q2C2	P84084	ADP-ribosylation factor 5	Arf5	establishment of localization;transport;vesicle-mediated transport	membrane;membrane part;plasma membrane;plasma membrane part
Q544Q7;P97370	Q544Q7;P97370	Sodium/potassium-transporting ATPase subunit beta-3	Atp1b3	cellular membrane organization;establishment of localization;membrane organization;transmembrane transport;transport	cytoplasmic membrane-bounded vesicle;cytoplasmic vesicle;membrane;membrane part;membrane raft;plasma membrane;plasma membrane part;protein complex	cation transmembrane transporter activity;inorganic cation transmembrane transporter activity;ion transmembrane transporter activity;substrate-specific transmembrane transporter activity;substrate-specific transporter activity;transmembrane transporter activity;transporter activity	Bile secretion;Cardiac muscle contraction
P97384;D3Z7U0	P97384;D3Z7U0	Annexin A11;Annexin	Anxa11	cellular membrane organization;establishment of localization;membrane organization;response to chemical stimulus;transport;vesicle-mediated transport	cytoplasmic membrane-bounded vesicle;cytoplasmic vesicle;membrane
P97429;A0A0N4SW89;A0A0N4SV57;D3Z0S1;F7ANV6;S4R1F2	P97429;A0A0N4SW89;A0A0N4SV57;D3Z0S1;F7ANV6;S4R1F2	Annexin A4;Annexin	Anxa4		apical plasma membrane;cell surface;membrane;membrane part;organelle membrane;plasma membrane;plasma membrane part
P97449;A0A0U1RNS3	P97449	Aminopeptidase N	Anpep		integral to membrane;intrinsic to membrane;lysosomal membrane;membrane;membrane part;organelle membrane;plasma membrane part;vacuolar membrane;vacuolar part
P97792	P97792	Coxsackievirus and adenovirus receptor homolog	Cxadr	establishment of localization;response to chemical stimulus;transport	basolateral plasma membrane;cytoplasmic membrane-bounded vesicle;cytoplasmic vesicle;integral to membrane;intrinsic to membrane;membrane;membrane part;membrane raft;plasma membrane;plasma membrane part;protein complex
P99028	P99028	Cytochrome b-c1 complex subunit 6, mitochondrial	Uqcrh		membrane;membrane part;mitochondrial membrane part;organelle membrane;protein complex	cation transmembrane transporter activity;inorganic cation transmembrane transporter activity;ion transmembrane transporter activity;substrate-specific transmembrane transporter activity;substrate-specific transporter activity;transmembrane transporter activity;transporter activity	Alzheimer's disease;Cardiac muscle contraction;Oxidative phosphorylation;Parkinson's disease
Q02013	Q02013	Aquaporin-1	Aqp1	establishment of localization;response to chemical stimulus;transmembrane transport;transport	apical plasma membrane;basolateral plasma membrane;integral to membrane;integral to plasma membrane;intrinsic to membrane;intrinsic to plasma membrane;membrane;membrane part;organelle membrane;plasma membrane;plasma membrane part;sarcolemma;vacuolar membrane;vacuolar part	cation transmembrane transporter activity;inorganic cation transmembrane transporter activity;ion transmembrane transporter activity;substrate-specific transmembrane transporter activity;substrate-specific transporter activity;transmembrane transporter activity;transporter activity	Bile secretion
Q02248;E9Q6A9;F6QZ47;F7BAC9;F7CRC6;D3YUH4	Q02248;E9Q6A9	Catenin beta-1	Ctnnb1	establishment of localization;response to chemical stimulus;transport;vesicle-mediated transport	basolateral plasma membrane;membrane;membrane part;plasma membrane;plasma membrane part;protein complex
Q02788;D3Z7D5	Q02788;D3Z7D5	Collagen alpha-2(VI) chain	Col6a2	response to chemical stimulus	membrane;plasma membrane;protein complex;sarcolemma
Q03265;D3Z6F5;D6RJ16	Q03265;D3Z6F5	ATP synthase subunit alpha, mitochondrial;ATP synthase subunit alpha	Atp5a1	establishment of localization;transmembrane transport;transport	membrane;membrane part;mitochondrial membrane part;organelle membrane;plasma membrane;protein complex	cation transmembrane transporter activity;inorganic cation transmembrane transporter activity;ion transmembrane transporter activity;substrate-specific transmembrane transporter activity;substrate-specific transporter activity;transmembrane transporter activity;transporter activity	Alzheimer's disease;Oxidative phosphorylation;Parkinson's disease
Q04857	Q04857	Collagen alpha-1(VI) chain	Col6a1	response to chemical stimulus	lysosomal membrane;membrane;organelle membrane;plasma membrane;protein complex;sarcolemma;vacuolar membrane;vacuolar part
Q059U0;Q8K3K7;A2AI22	Q059U0;Q8K3K7	1-acyl-sn-glycerol-3-phosphate acyltransferase;1-acyl-sn-glycerol-3-phosphate acyltransferase beta	Agpat2		endoplasmic reticulum;endoplasmic reticulum membrane;endoplasmic reticulum part;integral to membrane;intrinsic to membrane;membrane;membrane part;organelle membrane
Q06185;Q8BTB6	Q06185;Q8BTB6	ATP synthase subunit e, mitochondrial	Atp5i;Atp5k	establishment of localization;transmembrane transport;transport	membrane part;mitochondrial membrane part;protein complex	cation transmembrane transporter activity;inorganic cation transmembrane transporter activity;ion transmembrane transporter activity;substrate-specific transmembrane transporter activity;substrate-specific transporter activity;transmembrane transporter activity;transporter activity	Oxidative phosphorylation
Q07076	Q07076	Annexin A7	Anxa7	divalent inorganic cation homeostasis;membrane organization;response to chemical stimulus	endoplasmic reticulum membrane;endoplasmic reticulum part;membrane;membrane part;organelle membrane;plasma membrane
Q3UAI3;Q08857;A0A0G2JFB7	Q3UAI3;Q08857	Platelet glycoprotein 4	Cd36	cellular membrane organization;establishment of localization;membrane organization;response to chemical stimulus;transmembrane transport;transport;vesicle-mediated transport	cell surface;integral to membrane;intrinsic to membrane;membrane;membrane part;membrane raft;plasma membrane;plasma membrane part
Q2HZ94;Q61830	Q2HZ94;Q61830	Macrophage mannose receptor 1	Mrc1	cellular membrane organization;establishment of localization;membrane organization;response to chemical stimulus;transport;vesicle-mediated transport	cell surface;integral to membrane;intrinsic to membrane;membrane;membrane part;organelle membrane;plasma membrane
Q3TCU5;Q9R233;G3UZZ2	Q3TCU5;Q9R233	Tapasin	Tapbp		endoplasmic reticulum membrane;endoplasmic reticulum part;integral to membrane;integral to plasma membrane;intrinsic to membrane;intrinsic to plasma membrane;membrane;membrane part;organelle membrane;plasma membrane part;protein complex
Q3TML0;Q922R8	Q3TML0;Q922R8	Protein disulfide-isomerase A6	Pdia6	cellular membrane organization;establishment of localization;membrane organization;transport;vesicle-mediated transport	cytoplasmic membrane-bounded vesicle;cytoplasmic vesicle;endoplasmic reticulum;endoplasmic reticulum lumen;endoplasmic reticulum part;membrane;plasma membrane;protein complex
Q3TQC7;Q9WUZ9	Q3TQC7;Q9WUZ9	Ectonucleoside triphosphate diphosphohydrolase 5	Entpd5		endoplasmic reticulum
Q3TVJ8;Q9D8L3;Q62186	Q3TVJ8;Q9D8L3;Q62186	Translocon-associated protein subunit delta	Ssr4		endoplasmic reticulum;endoplasmic reticulum membrane;endoplasmic reticulum part;integral to membrane;intrinsic to membrane;membrane;membrane part;organelle membrane
Q3U125;Q9CYH2;D3YYG8;D3Z398;D3Z252;D3Z0A8;D3Z143;D3YWL4	Q3U125;Q9CYH2;D3YYG8;D3Z398;D3Z252;D3Z0A8	Redox-regulatory protein FAM213A	Fam213a
Q3U816;Q9Z2G9	Q3U816;Q9Z2G9	Oxidoreductase HTATIP2	Htatip2	establishment of localization;transport	membrane
Q3UEE8;Q9WU19	Q3UEE8;Q9WU19	Hydroxyacid oxidase 1	Hao1	response to chemical stimulus
Q3UEP4;D3YUP6;D3YWN0	Q3UEP4;D3YUP6;D3YWN0		Ugt2b36	response to chemical stimulus		transferase activity, transferring hexosyl groups
Q3URS9	Q3URS9	Coiled-coil domain-containing protein 51	Ccdc51		integral to membrane;intrinsic to membrane;membrane part
Q3UVJ7;Q9WV68	Q3UVJ7;Q9WV68	Peroxisomal 2,4-dienoyl-CoA reductase	Decr2		membrane;organelle membrane
Q3UXD9;Q99MZ7;D6RHN4;D6RIP0	Q3UXD9;Q99MZ7	Peroxisomal trans-2-enoyl-CoA reductase	Pecr		membrane;organelle membrane
Q3V3R4	Q3V3R4	Integrin alpha-1	Itga1	response to chemical stimulus	cell surface;cytoplasmic membrane-bounded vesicle;cytoplasmic vesicle;membrane;membrane part;membrane raft;plasma membrane;plasma membrane part;protein complex
Q499X4;Q62465	Q499X4;Q62465	Synaptic vesicle membrane protein VAT-1 homolog	Vat1		membrane;organelle membrane
Q53ZW9;Q9QXZ6;E9Q0W2;A0A0G2JDD1;Q91YY5;E0CX25	Q53ZW9;Q9QXZ6;E9Q0W2	Solute carrier organic anion transporter family member 1A1	Slco1a1	establishment of localization;response to chemical stimulus;transport	basolateral plasma membrane;integral to membrane;integral to plasma membrane;intrinsic to membrane;intrinsic to plasma membrane;membrane;membrane part;plasma membrane part	ion transmembrane transporter activity;substrate-specific transmembrane transporter activity;substrate-specific transporter activity;transmembrane transporter activity;transporter activity	Bile secretion
Q543S0;Q9JK53	Q543S0;Q9JK53	Prolargin	Prelp
Q5FW60	Q5FW60	Major urinary protein 20	Mup20	response to chemical stimulus		transporter activity
Q5NCJ9;Q8R1I1	Q5NCJ9;Q8R1I1	Cytochrome b-c1 complex subunit 9	Uqcr10		membrane;membrane part;mitochondrial membrane part;organelle membrane;protein complex		Alzheimer's disease;Cardiac muscle contraction;Oxidative phosphorylation;Parkinson's disease
Q60991	Q60991	25-hydroxycholesterol 7-alpha-hydroxylase	Cyp7b1		endoplasmic reticulum membrane;endoplasmic reticulum part;membrane;membrane part;organelle membrane
Q61335	Q61335	B-cell receptor-associated protein 31	Bcap31	divalent inorganic cation homeostasis;establishment of localization;transport;vesicle-mediated transport	cytoplasmic membrane-bounded vesicle;cytoplasmic vesicle;endoplasmic reticulum;endoplasmic reticulum membrane;endoplasmic reticulum part;integral to membrane;integral to plasma membrane;intrinsic to membrane;intrinsic to plasma membrane;membrane;membrane part;organelle membrane;plasma membrane part
Q62087;H3BL07	Q62087	Serum paraoxonase/lactonase 3	Pon3
Q63880	Q63880	Carboxylesterase 3A	Ces3a		endoplasmic reticulum lumen;endoplasmic reticulum part
Q63886	Q63886	UDP-glucuronosyltransferase 1-1	Ugt1a1	response to chemical stimulus	endoplasmic reticulum;endoplasmic reticulum membrane;endoplasmic reticulum part;integral to membrane;integral to plasma membrane;intrinsic to membrane;intrinsic to plasma membrane;membrane;membrane part;organelle membrane;plasma membrane part;protein complex	transferase activity, transferring hexosyl groups
Q64435	Q64435	UDP-glucuronosyltransferase 1-6	Ugt1a6	response to chemical stimulus	endoplasmic reticulum;endoplasmic reticulum membrane;endoplasmic reticulum part;integral to membrane;intrinsic to membrane;membrane;membrane part;organelle membrane	transferase activity, transferring hexosyl groups
Q64521;A2AQR0	Q64521;A2AQR0	Glycerol-3-phosphate dehydrogenase, mitochondrial;Glycerol-3-phosphate dehydrogenase	Gpd2		membrane;organelle membrane;protein complex
Q6A0D1;Q9CRD2	Q6A0D1;Q9CRD2	ER membrane protein complex subunit 2	Emc2		endoplasmic reticulum;protein complex
Q6GQT9	Q6GQT9	Nodal modulator 1	Nomo1		endoplasmic reticulum membrane;endoplasmic reticulum part;integral to membrane;intrinsic to membrane;membrane;membrane part;organelle membrane
Q6P5E4;G3UZU8;G3UY73;G3UYG7;G3UY35	Q6P5E4	UDP-glucose:glycoprotein glucosyltransferase 1	Uggt1		endoplasmic reticulum;endoplasmic reticulum lumen;endoplasmic reticulum part	transferase activity, transferring hexosyl groups
Q6XVG2	Q6XVG2	Cytochrome P450 2C54	Cyp2c54		endoplasmic reticulum membrane;endoplasmic reticulum part;membrane;membrane part;organelle membrane
Q71KT5;E0CX74;E9Q4M8;E0CX92;E0CYD6;E0CZ93;Q3V3I6	Q71KT5;E0CX74;E9Q4M8	Delta(14)-sterol reductase	Tm7sf2		endoplasmic reticulum membrane;endoplasmic reticulum part;integral to membrane;intrinsic to membrane;membrane;membrane part;organelle membrane;protein complex
Q78IK4;B1AV14	Q78IK4;B1AV14	MICOS complex subunit Mic27	Apool		integral to membrane;intrinsic to membrane;membrane;membrane part;organelle membrane
Q80UM7	Q80UM7	Mannosyl-oligosaccharide glucosidase	Mogs		endoplasmic reticulum membrane;endoplasmic reticulum part;integral to membrane;intrinsic to membrane;membrane;membrane part;organelle membrane
Q8BFZ9;A0A0R4J1G5;Q91X78;E9PUH5	Q8BFZ9	Erlin-2	Erlin2		endoplasmic reticulum;endoplasmic reticulum membrane;endoplasmic reticulum part;integral to membrane;intrinsic to membrane;membrane;membrane part;organelle membrane;plasma membrane;protein complex
Q8BGH2	Q8BGH2	Sorting and assembly machinery component 50 homolog	Samm50	cellular membrane organization;establishment of localization;membrane organization;transport	integral to membrane;intrinsic to membrane;membrane;membrane part;mitochondrial membrane part;organelle membrane;protein complex
Q8BGL3;E9QAK1	Q8BGL3;E9QAK1	Sulfotransferase	2810007J24Rik
Q8BGY7	Q8BGY7	Protein FAM210A	Fam210a		integral to membrane;intrinsic to membrane;membrane part
Q8BH24	Q8BH24	Transmembrane 9 superfamily member 4	Tm9sf4		integral to membrane;intrinsic to membrane;membrane part
Q8BIJ6;E9PWN2;E9PWN3	Q8BIJ6	Isoleucine--tRNA ligase, mitochondrial	Iars2
Q8BJL9	Q8BJL9		Ugt2b35	response to chemical stimulus		transferase activity, transferring hexosyl groups
Q8BMS1	Q8BMS1	Trifunctional enzyme subunit alpha, mitochondrial;Long-chain enoyl-CoA hydratase;Long chain 3-hydroxyacyl-CoA dehydrogenase	Hadha	response to chemical stimulus	membrane;organelle membrane;protein complex
Q8BT60;V9GX86;B7ZCP8;V9GWY2;B7ZCP7;B7ZCP6;B7ZCP5;E9Q806;A3KGK7;B7ZCP4;A0A0R4J1D0;A0A0R4J0J1;Q3UYN2;Q8C166;P59108;Q1RLL3;Q9Z140;Q9DC53;Q8JZW4	Q8BT60	Copine-3	Cpne3	response to chemical stimulus	cytoplasmic membrane-bounded vesicle;cytoplasmic vesicle;membrane;plasma membrane
Q8BWM0	Q8BWM0	Prostaglandin E synthase 2;Prostaglandin E synthase 2 truncated form	Ptges2	establishment of localization;transport	integral to membrane;intrinsic to membrane;membrane;membrane part;organelle membrane
Q8BWQ1	Q8BWQ1	UDP-glucuronosyltransferase 2A3	Ugt2a3	response to chemical stimulus	integral to membrane;intrinsic to membrane;membrane part	transferase activity, transferring hexosyl groups
Q8C0Z1;F6SQM4;D3Z6P3	Q8C0Z1;F6SQM4	Protein ITFG3	Itfg3		cell surface;integral to membrane;intrinsic to membrane;membrane part
Q8C165;F7B8J4	Q8C165	Probable carboxypeptidase PM20D1	Pm20d1
Z4YJW0;Q8C7X2	Z4YJW0;Q8C7X2	ER membrane protein complex subunit 1	Emc1		endoplasmic reticulum;integral to membrane;intrinsic to membrane;membrane part;protein complex
Q8CAQ8;E9Q800;E9QAY6;A0A0U1RQ14	Q8CAQ8;E9Q800;E9QAY6	MICOS complex subunit Mic60	Immt	divalent inorganic cation homeostasis	integral to membrane;intrinsic to membrane;membrane;membrane part;organelle membrane
Q8CHQ9	Q8CHQ9	Probable N-acetyltransferase CML2	Cml2		endoplasmic reticulum;integral to membrane;intrinsic to membrane;membrane part
Q8JZN5;A0A0G2JF25;A0A0G2JDY4	Q8JZN5	Acyl-CoA dehydrogenase family member 9, mitochondrial	Acad9
Q8JZZ0	Q8JZZ0	UDP-glucuronosyltransferase 3A2	Ugt3a2	response to chemical stimulus	integral to membrane;intrinsic to membrane;membrane part	transferase activity, transferring hexosyl groups
Q8K154;E9PZ30;D3YUX6;A0A0J9YU36;Q80X89;Q6PDD0	Q8K154;E9PZ30		Ugt2b34	response to chemical stimulus	integral to membrane;intrinsic to membrane;membrane;membrane part;plasma membrane	transferase activity, transferring hexosyl groups
Q8K2B3	Q8K2B3	Succinate dehydrogenase [ubiquinone] flavoprotein subunit, mitochondrial	Sdha		membrane;membrane part;mitochondrial membrane part;organelle membrane;protein complex		Alzheimer's disease;Oxidative phosphorylation;Parkinson's disease
Q8QZR3;F6Z9B9;Q9D998;Q6AW46	Q8QZR3	Pyrethroid hydrolase Ces2a	Ces2a	response to chemical stimulus
Q8R084	Q8R084		Ugt2b1	response to chemical stimulus		transferase activity, transferring hexosyl groups
Q8R0F9	Q8R0F9	SEC14-like protein 4	Sec14l4		integral to membrane;intrinsic to membrane;membrane part	transporter activity
Q8R0J2;Q9R0Q9;E9PVP3;Q5F2B1;F6XX36;F6ZGG4	Q8R0J2;Q9R0Q9;E9PVP3;Q5F2B1;F6XX36	Mannose-P-dolichol utilization defect 1 protein	Mpdu1	establishment of localization;transport	endoplasmic reticulum;integral to membrane;intrinsic to membrane;membrane;membrane part
Q8VCU1;G3UYS7	Q8VCU1	Carboxylesterase 3B	Ces3b		endoplasmic reticulum lumen;endoplasmic reticulum part
Q8VCW8	Q8VCW8	Acyl-CoA synthetase family member 2, mitochondrial	Acsf2
Q8VDD5;F2Z494;Q8BXF2	Q8VDD5	Myosin-9	Myh9	cellular membrane organization;establishment of localization;membrane organization;response to chemical stimulus;transport;vesicle-mediated transport	membrane;membrane part;plasma membrane;plasma membrane part;protein complex
Q8VDN2;D3YYN7;Q3UHK5;Q6PIE5;A0A0G2JGX4;Q8VCE0;Q6PIC6;Q9WV27;Q91WH7;E9QNX7;Q64436;Q9Z1W8	Q8VDN2	Sodium/potassium-transporting ATPase subunit alpha-1	Atp1a1	divalent inorganic cation homeostasis;establishment of localization;response to chemical stimulus;transmembrane transport;transport	apical plasma membrane;basolateral plasma membrane;cytoplasmic membrane-bounded vesicle;cytoplasmic vesicle;endoplasmic reticulum;integral to membrane;intrinsic to membrane;membrane;membrane part;membrane raft;plasma membrane;plasma membrane part;protein complex;sarcolemma	cation transmembrane transporter activity;inorganic cation transmembrane transporter activity;ion transmembrane transporter activity;substrate-specific transmembrane transporter activity;substrate-specific transporter activity;transmembrane transporter activity;transporter activity	Bile secretion;Cardiac muscle contraction;Oxidative phosphorylation
Q91VC9	Q91VC9	Growth hormone-inducible transmembrane protein	Ghitm		integral to membrane;intrinsic to membrane;membrane;membrane part;organelle membrane
Q91VD9;A0A087WQR0;A0A087WQ77;A0A087WP77;A0A087WR47	Q91VD9	NADH-ubiquinone oxidoreductase 75 kDa subunit, mitochondrial	Ndufs1		membrane part;mitochondrial membrane part;protein complex		Alzheimer's disease;Oxidative phosphorylation;Parkinson's disease
Q91W64	Q91W64	Cytochrome P450 2C70	Cyp2c70		endoplasmic reticulum membrane;endoplasmic reticulum part;membrane;membrane part;organelle membrane
Q91WD5;D3YXT0;A0A0A6YW30;A0A0A6YXD3	Q91WD5;D3YXT0	NADH dehydrogenase [ubiquinone] iron-sulfur protein 2, mitochondrial	Ndufs2	response to chemical stimulus	membrane part;mitochondrial membrane part;protein complex		Alzheimer's disease;Oxidative phosphorylation;Parkinson's disease
Q91WL5	Q91WL5	Cytochrome P450 4A12A	Cyp4a12a		endoplasmic reticulum membrane;endoplasmic reticulum part;membrane;membrane part;organelle membrane
Q91WN4;Q3V0K6	Q91WN4;Q3V0K6	Kynurenine 3-monooxygenase	Kmo		integral to membrane;intrinsic to membrane;membrane;membrane part;organelle membrane
Q91WU0;D3Z298	Q91WU0	Carboxylic ester hydrolase	Ces1f
Q91YP0	Q91YP0	L-2-hydroxyglutarate dehydrogenase, mitochondrial	L2hgdh		integral to membrane;intrinsic to membrane;membrane part
Q91YQ5;A0A0N4SUJ8	Q91YQ5	Dolichyl-diphosphooligosaccharide--protein glycosyltransferase subunit 1	Rpn1		cytoplasmic membrane-bounded vesicle;cytoplasmic vesicle;endoplasmic reticulum;endoplasmic reticulum membrane;endoplasmic reticulum part;integral to membrane;intrinsic to membrane;membrane;membrane part;organelle membrane	transferase activity, transferring hexosyl groups
Q921G7;Q6PF96	Q921G7;Q6PF96	Electron transfer flavoprotein-ubiquinone oxidoreductase, mitochondrial	Etfdh	response to chemical stimulus	integral to membrane;intrinsic to membrane;membrane;membrane part;mitochondrial membrane part;organelle membrane;protein complex
Z4YKT6;Q99J47	Z4YKT6;Q99J47	Dehydrogenase/reductase SDR family member 7B	Dhrs7b		endoplasmic reticulum membrane;endoplasmic reticulum part;integral to membrane;intrinsic to membrane;membrane;membrane part;organelle membrane
Q99JB2;A2AG39;F6WI02;A2AG41	Q99JB2;A2AG39;F6WI02	Stomatin-like protein 2, mitochondrial	Stoml2	divalent inorganic cation homeostasis;establishment of localization;transmembrane transport;transport	membrane;membrane part;membrane raft;organelle membrane;plasma membrane part;protein complex
Q99JY0;D3YXU1	Q99JY0	Trifunctional enzyme subunit beta, mitochondrial;3-ketoacyl-CoA thiolase	Hadhb		endoplasmic reticulum;membrane;organelle membrane;protein complex
Q99KR3	Q99KR3	Beta-lactamase-like protein 2	Lactb2
Q99KV1	Q99KV1	DnaJ homolog subfamily B member 11	Dnajb11		endoplasmic reticulum;endoplasmic reticulum lumen;endoplasmic reticulum part;membrane
Q99L04	Q99L04	Dehydrogenase/reductase SDR family member 1	Dhrs1		endoplasmic reticulum;membrane;organelle membrane
Q99LB2	Q99LB2	Dehydrogenase/reductase SDR family member 4	Dhrs4		membrane;organelle membrane
Q99M87	Q99M87	DnaJ homolog subfamily A member 3, mitochondrial	Dnaja3	cellular membrane organization;membrane organization;response to chemical stimulus	membrane;membrane part;plasma membrane part;protein complex
Q99PG0	Q99PG0	Arylacetamide deacetylase	Aadac		endoplasmic reticulum membrane;endoplasmic reticulum part;integral to membrane;intrinsic to membrane;membrane;membrane part;organelle membrane
Q9CQ92;G3X9U9;D3YZ32	Q9CQ92;G3X9U9	Mitochondrial fission 1 protein	Fis1	cellular membrane organization;divalent inorganic cation homeostasis;establishment of localization;membrane organization;transport	integral to membrane;intrinsic to membrane;membrane;membrane part;mitochondrial membrane part;protein complex
Q9CQF9;F7CIP8;D3Z275	Q9CQF9;F7CIP8;D3Z275	Prenylcysteine oxidase	Pcyox1		membrane;organelle membrane;plasma membrane;vacuolar membrane;vacuolar part	ion transmembrane transporter activity;substrate-specific transmembrane transporter activity;substrate-specific transporter activity;transmembrane transporter activity;transporter activity
Q9CQH3;D3Z568;F6Y6V5;D3YX99;D3Z6W9	Q9CQH3;D3Z568;F6Y6V5;D3YX99;D3Z6W9	NADH dehydrogenase [ubiquinone] 1 beta subcomplex subunit 5, mitochondrial	Ndufb5		integral to membrane;intrinsic to membrane;membrane;membrane part;mitochondrial membrane part;organelle membrane;protein complex		Alzheimer's disease;Oxidative phosphorylation;Parkinson's disease
Q9CQX2	Q9CQX2	Cytochrome b5 type B	Cyb5b		integral to membrane;intrinsic to membrane;membrane;membrane part;organelle membrane
Q9CR68	Q9CR68	Cytochrome b-c1 complex subunit Rieske, mitochondrial;Cytochrome b-c1 complex subunit 11	Uqcrfs1	response to chemical stimulus	membrane;membrane part;mitochondrial membrane part;organelle membrane;protein complex	cation transmembrane transporter activity;inorganic cation transmembrane transporter activity;ion transmembrane transporter activity;substrate-specific transmembrane transporter activity;substrate-specific transporter activity;transmembrane transporter activity;transporter activity	Alzheimer's disease;Cardiac muscle contraction;Oxidative phosphorylation;Parkinson's disease
Q9CRB9;Q9D9P1;D3Z0L4;S4R238;F6QFL0	Q9CRB9;Q9D9P1;D3Z0L4	MICOS complex subunit Mic19	Chchd3	cellular membrane organization;membrane organization	membrane;organelle membrane
Q9CXJ4;F6ZFC5;D3Z1J6	Q9CXJ4	ATP-binding cassette sub-family B member 8, mitochondrial	Abcb8	establishment of localization;transmembrane transport;transport	integral to membrane;intrinsic to membrane;membrane;membrane part;organelle membrane	transmembrane transporter activity;transporter activity
Q9CY50	Q9CY50	Translocon-associated protein subunit alpha	Ssr1		endoplasmic reticulum;endoplasmic reticulum membrane;endoplasmic reticulum part;integral to membrane;intrinsic to membrane;membrane;membrane part;organelle membrane
Q9CZ13;A0A0A6YW82;A0A0A6YWX6;A0A0A6YVZ0	Q9CZ13	Cytochrome b-c1 complex subunit 1, mitochondrial	Uqcrc1	response to chemical stimulus	membrane;membrane part;mitochondrial membrane part;organelle membrane;protein complex		Alzheimer's disease;Cardiac muscle contraction;Oxidative phosphorylation;Parkinson's disease
Q9CZX8;D3YUT3;D3YUG3;D3Z5R8;D3Z722;S4R223	Q9CZX8;D3YUT3;D3YUG3;D3Z5R8;D3Z722	40S ribosomal protein S19	Rps19	response to chemical stimulus	membrane
Q9D024;F7C265;B1AR93	Q9D024;F7C265	Coiled-coil domain-containing protein 47	Ccdc47	divalent inorganic cation homeostasis	endoplasmic reticulum;integral to membrane;intrinsic to membrane;membrane;membrane part
Q9D0F3;D3Z5B9	Q9D0F3	Protein ERGIC-53	Lman1	establishment of localization;transport;vesicle-mediated transport	cytoplasmic membrane-bounded vesicle;cytoplasmic vesicle;endoplasmic reticulum membrane;endoplasmic reticulum part;integral to membrane;intrinsic to membrane;membrane;membrane part;organelle membrane
Q9D1Q6	Q9D1Q6	Endoplasmic reticulum resident protein 44	Erp44	response to chemical stimulus	cell surface;endoplasmic reticulum;endoplasmic reticulum lumen;endoplasmic reticulum membrane;endoplasmic reticulum part;membrane;membrane part;organelle membrane
Q9D379;E9PWK1;F6YTS6;D3Z4M3	Q9D379;E9PWK1	Epoxide hydrolase 1	Ephx1	response to chemical stimulus	endoplasmic reticulum membrane;endoplasmic reticulum part;integral to membrane;intrinsic to membrane;membrane;membrane part;organelle membrane		Bile secretion
Q9D6U8	Q9D6U8	Protein FAM162A	Fam162a	response to chemical stimulus	integral to membrane;intrinsic to membrane;membrane part
Q9D7N9	Q9D7N9	Adipocyte plasma membrane-associated protein	Apmap		cell surface;integral to membrane;intrinsic to membrane;membrane;membrane part
Q9DB05;P28663	Q9DB05	Alpha-soluble NSF attachment protein	Napa	establishment of localization;membrane organization;transport	membrane;membrane part;organelle membrane;protein complex;vacuolar membrane;vacuolar part
Q9DB77;A0A140LI98	Q9DB77	Cytochrome b-c1 complex subunit 2, mitochondrial	Uqcrc2		membrane;membrane part;mitochondrial membrane part;organelle membrane;protein complex		Alzheimer's disease;Cardiac muscle contraction;Oxidative phosphorylation;Parkinson's disease
Q9DBE0	Q9DBE0	Cysteine sulfinic acid decarboxylase	Csad
Q9DBH5	Q9DBH5	Vesicular integral-membrane protein VIP36	Lman2	establishment of localization;transport;vesicle-mediated transport	cell surface;integral to membrane;integral to plasma membrane;intrinsic to membrane;intrinsic to plasma membrane;membrane;membrane part;organelle membrane;plasma membrane part
Q9DCS9;D3YUK4	Q9DCS9;D3YUK4	NADH dehydrogenase [ubiquinone] 1 beta subcomplex subunit 10	Ndufb10		membrane;membrane part;mitochondrial membrane part;organelle membrane;protein complex		Alzheimer's disease;Oxidative phosphorylation;Parkinson's disease
Q9DCT2	Q9DCT2	NADH dehydrogenase [ubiquinone] iron-sulfur protein 3, mitochondrial	Ndufs3		membrane;membrane part;mitochondrial membrane part;organelle membrane;protein complex		Alzheimer's disease;Oxidative phosphorylation;Parkinson's disease
Q9DCV4;A2AGJ2	Q9DCV4;A2AGJ2	Regulator of microtubule dynamics protein 1	Rmdn1		protein complex
Q9EP75;Q8VCA4;Q99N18;G3UW81;G3UW78;Q99N17;Q3V1F1;Q99N16	Q9EP75;Q8VCA4;Q99N18	Leukotriene-B4 omega-hydroxylase 3	Cyp4f14;Cyp4f15		apical plasma membrane;endoplasmic reticulum membrane;endoplasmic reticulum part;integral to membrane;intrinsic to membrane;membrane;membrane part;organelle membrane;plasma membrane part
Q9EQH2	Q9EQH2	Endoplasmic reticulum aminopeptidase 1	Erap1		endoplasmic reticulum membrane;endoplasmic reticulum part;integral to membrane;intrinsic to membrane;membrane;membrane part;organelle membrane
Q9JKR6;F6TRP3;E0CYZ2	Q9JKR6	Hypoxia up-regulated protein 1	Hyou1	response to chemical stimulus	endoplasmic reticulum lumen;endoplasmic reticulum part;membrane;protein complex
Q9JKY7	Q9JKY7		Cyp2d22	response to chemical stimulus
Q9QXX4	Q9QXX4	Calcium-binding mitochondrial carrier protein Aralar2	Slc25a13	establishment of localization;response to chemical stimulus;transport	integral to membrane;intrinsic to membrane;membrane;membrane part;organelle membrane	substrate-specific transmembrane transporter activity;substrate-specific transporter activity;transmembrane transporter activity;transporter activity
Q9Z0M5	Q9Z0M5	Lysosomal acid lipase/cholesteryl ester hydrolase	Lipa
Q9Z211	Q9Z211	Peroxisomal membrane protein 11A	Pex11a		integral to membrane;intrinsic to membrane;membrane part;protein complex
