# Supplementary material for: Re-Adaption on Earth after Spaceflights Affects the Mouse Liver Proteome
Source: Int J Mol Sci. 2017 Aug 12;18(8):1763. doi: 10.3390/ijms18081763 (PMC5578152; doi:10.3390/ijms18081763)
Supplement: Supplementary file 1 [file ijms-18-01763-s001.zip › Table S5.xlsx]

## Sheet: control_post-flight
			normalized (Z-score)
Protein IDs	Protein names	Gene names	LFQ intensity f01	LFQ intensity f02	LFQ intensity f03	LFQ intensity f04	LFQ intensity k01	LFQ intensity k02	LFQ intensity k03	LFQ intensity P01	LFQ intensity P02	LFQ intensity P03	Student's T-test Significant control_post-flight	Student's T-test significant	-Log Student's T-test p-value control_post-flight	Student's T-test q-value control_post-flight	Student's T-test Difference control_post-flight	Student's T-test Test statistic control_post-flight
			flight	flight	flight	flight	control	control	control	post-flight	post-flight	post-flight
J3QQ16;A0A087WS16;E9PWQ3;D3YWD1		Col6a3	0.976678	-0.233488	0.233488	-0.483178	1.50989	0.714382	0.982105	-1.41813	-0.881441	-1.07747	+	control_post-flight	2.83591	0.0206667	2.19447	5.7534
A0A0A0MQ68;Q60759;D3Z4I2	Glutaryl-CoA dehydrogenase, mitochondrial	Gcdh	-0.0726065	-0.225387	-0.815811	-0.192473	-0.166655	0.0726065	0.0838718	1.87467	1.23214	1.78009	+	control_post-flight	2.78205	0.0155	-1.63236	-5.16072
A0A0R4IZY2;Q8CIM7;Q6P8N9	Cytochrome P450 2D26	Cyp2d26	-0.0311881	0.0311881	-0.147614	-0.367109	1.26415	1.73951	1.14268	0.0573922	-1.208	-1.20385	+	control_post-flight	2.03854	0.0473571	2.16693	3.87786
A0A0R4J023;Q9JLZ3;F6RT60;F6R307;A0A0R4J1L8;E9Q6L3;E9QMT1	Methylglutaconyl-CoA hydratase, mitochondrial	Auh	-0.797198	-0.148626	-1.07632	1.14781	-0.328369	-0.17159	0.148626	1.22103	1.22326	1.64918	+	control_post-flight	2.75238	0.0446316	-1.4816	-4.94013
E9QN08;A0A0R4J1L2;Q91VK2;Q80T06;P57776;F6ZFU0;A0A0R4J1E2;D3Z7N2;D3YUQ9;D3YZT9;D3YY68	Elongation factor 1-delta	Eef1d	-0.408857	-0.84317	-0.58703	0.662929	-0.682214	-0.274728	0.274728	1.51483	1.10642	1.78958	+	control_post-flight	2.11902	0.0461333	-1.69768	-3.84988
Q5M9M5;A0A140T8M7;P62751;D3YTY6	60S ribosomal protein L23a	Rpl23a	-0.302518	-0.174128	-0.304936	0.0749538	-0.21445	0.273563	-0.0749538	2.03246	1.69767	1.28067	+	control_post-flight	2.51643	0.0335172	-1.67555	-4.63585
A2AP31;Q3UIU2;A2AP32	NADH dehydrogenase [ubiquinone] 1 beta subcomplex subunit 6	Ndufb6	0.212123	-0.164342	0.164342	-0.407067	0.368403	0.854579	0.373175	-1.49601	-1.09693	-2.07092	+	control_post-flight	2.51705	0.0424	2.08667	4.90458
B9EHY2;Q80W54;I7HIP5	CAAX prenyl protease 1 homolog	Zmpste24	0.725965	-0.12302	0.604571	-0.399506	0.12302	0.147428	0.721847	-2.04105	-0.980311	-1.49931	+	control_post-flight	2.14285	0.0418113	1.83765	3.96554
D3YWT0;D3Z569;D3YTS1;Q9R0P6	Signal peptidase complex catalytic subunit SEC11;Signal peptidase complex catalytic subunit SEC11A	Sec11a	0.471186	0.506724	0.443384	-0.0266629	0.0266629	0.251964	-0.469076	-1.94512	-1.20611	-1.67377	+	control_post-flight	2.15445	0.0493115	1.54485	3.83135
E9Q3B9;D3YYS6;O35678;Q3UFN1	Monoglyceride lipase	Mgll	0.855251	0.102851	0.0320833	0.154989	-0.0640642	0.880211	-0.0320833	-1.91815	-1.21669	-1.5144	+	control_post-flight	2.09154	0.0469153	1.8111	3.85066
F6SVV1;Q4FZE6;P62082	40S ribosomal protein S7	Gm9493;Rps7	-1.04063	0.84512	-0.00507851	-0.186025	0.00507851	-0.356251	-0.913916	1.13325	1.71562	1.40657	+	control_post-flight	2.36429	0.0374444	-1.84018	-4.42531
Q9WUD0;G3X8Q9;P12791;A6H6J2	Cytochrome P450 2B10	Cyp2b10	-0.456803	0.402319	0.101291	0.253434	-1.67693	-1.50852	-1.79759	-0.101291	0.448555	0.156342	+	control_post-flight	3.28084	0.062	-1.82888	-6.54121
O88451	Retinol dehydrogenase 7	Rdh7	-0.97219	-0.231606	0.413127	0.231606	0.983338	0.725189	1.19681	-1.61616	-0.833116	-1.24323	+	control_post-flight	2.94481	0.0248	2.19928	6.04103
Q7JCZ1;P00405	Cytochrome c oxidase subunit 2	mt-Co2;Mtco2	0.906608	-0.0571211	-0.283197	0.0571211	0.919044	1.35671	0.446947	-0.791098	-0.914467	-1.93499	+	control_post-flight	2.04336	0.0465263	2.12109	3.87296
P05202	Aspartate aminotransferase, mitochondrial	Got2	-0.352686	-0.0991501	0.047888	0.218145	-0.047888	-0.265862	-0.107449	1.88765	1.24818	1.90006	+	control_post-flight	2.89649	0.0275556	-1.81903	-5.59928
P08249;A0A0G2JF23;A0A0G2JGY4	Malate dehydrogenase, mitochondrial	Mdh2	-0.142275	0.0445978	-0.197024	0.036042	-0.036042	-0.134936	-0.258196	1.89432	1.33519	1.86556	+	control_post-flight	3.17315	0.031	-1.84141	-6.28907
P09055	Integrin beta-1	Itgb1	0.691461	-0.478493	0.232959	-0.232959	1.23798	0.775617	1.05965	-1.95146	-0.50315	-0.930573	+	control_post-flight	2.05722	0.0421818	2.15281	3.91255
P10649;A2AE89	Glutathione S-transferase Mu 1	Gstm1	-0.078464	0.00958602	0.141201	-0.100142	-0.00958602	-0.73548	-0.738005	1.58407	0.98038	2.09945	+	control_post-flight	2.14689	0.0457391	-2.04899	-4.06434
Q543H3;P11725;Q8R1A8	Ornithine carbamoyltransferase, mitochondrial	Otc	-0.556663	-0.0105954	-0.509675	0.664662	0.0105954	-0.523745	-1.079	1.47745	0.92978	1.87148	+	control_post-flight	2.03053	0.047	-1.95696	-3.7886
P14824;F8WIT2	Annexin A6;Annexin	Anxa6	0.735694	0.0536747	-0.0536747	-0.588231	0.690629	0.805358	0.779211	-1.63022	-1.51476	-1.19253	+	control_post-flight	4.07813	0	2.20424	9.36025
Q52JJ6;P16406;F7B9G4;F6YHW2	Glutamyl aminopeptidase	Enpep	0.783787	-0.475611	0.146981	-0.660812	1.21906	1.02881	1.60597	-1.20666	-0.146981	-1.04876	+	control_post-flight	2.30681	0.0385143	2.08541	4.42584
Q3UKR1;P28654	Decorin	Dcn	0.0262256	-0.701679	0.946364	-0.0262256	2.00764	1.55763	0.889759	-0.13475	-0.577979	-0.0997296	+	control_post-flight	2.09012	0.047746	1.75583	3.82227
Q3TG75;P29758	Ornithine aminotransferase, mitochondrial	Oat	-0.302301	0.275736	0.762893	-0.275736	-1.0483	-0.339519	-0.306466	1.70215	1.09101	1.66698	+	control_post-flight	2.55396	0.0471111	-2.05147	-4.97065
Q5SUC3;P35564	Calnexin	Canx	-0.374973	0.131222	-0.131222	0.268161	0.160278	0.418249	0.764379	-1.92645	-1.19278	-1.68351	+	control_post-flight	2.74398	0.0206667	2.04855	5.42187
P45952;D6RFD7	Medium-chain specific acyl-CoA dehydrogenase, mitochondrial	Acadm	0.921644	-0.130643	0.0133394	-0.297229	-0.0529444	-0.0133394	-0.918079	1.87078	1.07559	1.59449	+	control_post-flight	2.09346	0.0457241	-1.84174	-3.86816
Q544B1;P47738;A0A0G2JEU1;A0A0G2JFQ0;A0A0G2JF60;D3YYF3	Aldehyde dehydrogenase, mitochondrial	Aldh2	-0.129443	-0.191334	-0.183026	-0.334881	-0.163114	0.129443	0.274031	1.98738	1.37963	1.68211	+	control_post-flight	2.74305	0.0418824	-1.60292	-5.0483
P48771	Cytochrome c oxidase subunit 7A2, mitochondrial	Cox7a2	0.519546	-0.0244939	0.357378	-0.208596	0.132107	0.0244939	0.535138	-1.79375	-1.0494	-1.98369	+	control_post-flight	2.31994	0.0347619	1.83953	4.3313
P52430;H3BK03;H3BLB8	Serum paraoxonase/arylesterase 1	Pon1	0.000612293	-0.000612293	0.525238	-0.0616275	0.307371	0.799102	0.362586	-2.11791	-1.11528	-1.45823	+	control_post-flight	2.45561	0.03888	2.05349	4.74482
Q8JZZ5;P53811	Phosphatidylinositol transfer protein beta isoform	Pitpnb	0.10606	-0.10606	-0.187141	0.262443	0.6977	0.657783	0.993839	-0.880949	-2.1383	-1.27201	+	control_post-flight	2.33776	0.0313548	2.21353	4.55146
P58710	L-gulonolactone oxidase	Gulo	0.571733	0.189802	0.386591	-0.189802	0.323978	0.191548	-0.488575	-1.61527	-1.3006	-1.9418	+	control_post-flight	2.18937	0.041037	1.62821	3.94776
Q4FZH2;P61255;B1ARA3;B1ARA5	60S ribosomal protein L26	Rpl26	-0.282999	0.471087	-0.249672	-0.304559	-0.0172161	0.0172161	-0.924807	1.70101	1.57533	1.52051	+	control_post-flight	2.43538	0.0324	-1.90722	-4.61771
P61804	Dolichyl-diphosphooligosaccharide--protein glycosyltransferase subunit DAD1	Dad1	-0.45312	0.392774	1.15483	0.16628	0.133645	0.399271	-0.133645	-1.94013	-0.963172	-1.54667	+	control_post-flight	2.12774	0.0485161	1.61641	3.82301
P61922;Q3TUE8;F7C9G3;F6RN86	4-aminobutyrate aminotransferase, mitochondrial	Abat	-0.0385006	-0.176357	0.0195806	0.158427	-0.251063	-0.0195806	-0.0729924	1.9545	1.14638	1.93363	+	control_post-flight	2.54371	0.0368696	-1.79272	-4.78038
Q5M9M4;P62245;F8WJ41;D3YVB4;D3Z712	40S ribosomal protein S15a	Rps15a	-0.0582897	-0.262984	0.231395	-0.73835	0.0582897	-0.725839	-0.561168	1.96345	1.10671	1.55037	+	control_post-flight	2.32174	0.0394595	-1.94975	-4.39361
Q3UC02;P62281	40S ribosomal protein S11	Rps11	-1.09238	0.343772	0.118943	-0.118943	-0.275788	-0.223583	-0.973759	1.84762	1.20683	1.3099	+	control_post-flight	2.46771	0.036	-1.94583	-4.71186
P62827;Q14AA6;A6H622;Q61820	GTP-binding nuclear protein Ran;GTP-binding nuclear protein Ran, testis-specific isoform	Ran;1700009N14Rik;Rasl2-9	-0.00776421	-1.04941	-1.20647	0.018066	0.00776421	-1.02628	-0.916465	1.43776	0.786538	1.3652	+	control_post-flight	2.04875	0.0462769	-1.84149	-3.77915
Q3UW83;Q5M9K7;P63325	40S ribosomal protein S10	Rps10	-1.01065	-0.101426	0.0578672	0.589872	-0.152131	-0.0578672	-0.489926	1.5361	1.13925	1.92172	+	control_post-flight	2.60239	0.040381	-1.76566	-4.88824
P68040	Guanine nucleotide-binding protein subunit beta-2-like 1;Guanine nucleotide-binding protein subunit beta-2-like 1, N-terminally processed	Gnb2l1	-0.865594	0.227312	-0.62746	0.357753	-0.400884	-0.227312	-1.2678	1.68829	1.27953	1.17054	+	control_post-flight	2.30544	0.0384211	-2.01145	-4.38859
Q542X7;P80314	T-complex protein 1 subunit beta	Cct2	1.1187	-0.299242	0.0846877	-0.143345	1.67745	1.4238	1.30966	-0.0846877	-0.834108	-0.609977	+	control_post-flight	2.8797	0.0155	1.97989	5.70157
P97384;D3Z7U0	Annexin A11;Annexin	Anxa11	-0.069043	0.586709	0.069043	-0.199117	0.264178	0.550533	0.371694	-2.17097	-1.61474	-0.880388	+	control_post-flight	2.15421	0.043451	1.95083	4.03936
P97429;A0A0N4SW89;A0A0N4SV57;D3Z0S1;F7ANV6;S4R1F2	Annexin A4;Annexin	Anxa4	0.0696653	0.250988	0.341736	-0.130635	-0.0696653	0.111749	0.430381	-2.27521	-1.11906	-1.47202	+	control_post-flight	2.05796	0.0472727	1.77959	3.77034
Q02788;D3Z7D5	Collagen alpha-2(VI) chain	Col6a2	0.969785	-0.513299	0.513299	-0.850545	1.31673	0.782629	0.714424	-1.71688	-0.773008	-0.638134	+	control_post-flight	2.15293	0.0452245	1.9806	4.0493
Q04857	Collagen alpha-1(VI) chain	Col6a1	0.657171	-0.287162	0.287162	-0.670796	0.789086	0.862173	0.375189	-2.06771	-0.790359	-1.24353	+	control_post-flight	2.14472	0.044766	2.04268	4.05728
Q07417	Short-chain specific acyl-CoA dehydrogenase, mitochondrial	Acads	1.04602	0.30287	-0.978445	-0.344511	-0.30287	-0.726159	-0.485891	1.91326	1.18026	0.910683	+	control_post-flight	2.32522	0.0356098	-1.83971	-4.34249
Q14AZ9;Q8BGC4	Zinc-binding alcohol dehydrogenase domain-containing protein 2	Zadh2	0.0411638	0.970931	-0.0411638	-0.245677	-0.410445	-0.515028	-0.374146	1.91872	1.04924	1.62403	+	control_post-flight	2.79131	0.0225455	-1.96387	-5.47388
Q2HZ94;Q61830	Macrophage mannose receptor 1	Mrc1	0.888289	-0.773022	-0.29744	0.18238	1.77173	1.15824	1.15711	-1.15023	-0.56203	-0.18238	+	control_post-flight	2.33737	0.0356471	1.99391	4.4498
Q3TL44	NLR family member X1	Nlrx1	-0.250761	1.14048	-0.525864	0.113994	-1.2565	-1.17252	-0.113994	1.35239	1.00425	1.24211	+	control_post-flight	2.23405	0.0413023	-2.04725	-4.24987
Q3TWI2;Q99LB7;A2AH52;A2AH53	Sarcosine dehydrogenase, mitochondrial	Sardh	-0.503948	-0.108952	0.0381634	0.177016	-0.264083	-0.224839	-0.0381634	2.05874	1.10632	1.76558	+	control_post-flight	2.48134	0.0347143	-1.81924	-4.66322
Q3UW66;Q99J99	Sulfurtransferase;3-mercaptopyruvate sulfurtransferase	Mpst	0.132516	0.035646	-1.83121	-0.17505	-0.55567	-0.035646	-0.202305	1.65469	1.24153	0.983273	+	control_post-flight	2.48099	0.033625	-1.55771	-4.47014
Q6ZWX6	Eukaryotic translation initiation factor 2 subunit 1	Eif2s1	-1.17012	0.113939	-0.784848	-0.113939	-0.654695	0.285808	-0.471953	1.53046	1.34731	1.44853	+	control_post-flight	2.37971	0.0374359	-1.72238	-4.38544
Q8BT60;V9GX86;B7ZCP8;V9GWY2;B7ZCP7;B7ZCP6;B7ZCP5;E9Q806;A3KGK7;B7ZCP4;A0A0R4J1D0;A0A0R4J0J1;Q3UYN2;Q8C166;P59108;Q1RLL3;Q9Z140;Q9DC53;Q8JZW4	Copine-3	Cpne3	0.688529	-0.810904	0.494193	-0.219283	0.219283	0.920214	0.35191	-1.82947	-1.11085	-1.40584	+	control_post-flight	2.53827	0.0385455	1.94585	4.87053
Z4YJW0;Q8C7X2	ER membrane protein complex subunit 1	Emc1	-0.0383533	0.424769	0.259544	0.0482966	0.0383533	-0.20109	0.212632	-2.074	-1.10213	-1.77345	+	control_post-flight	2.23115	0.0438333	1.66649	4.05172
Q8CHT0	Delta-1-pyrroline-5-carboxylate dehydrogenase, mitochondrial	Aldh4a1	-0.914392	-0.52256	-0.404646	0.108449	0.15333	-0.108449	-0.176802	1.90438	0.988396	1.74505	+	control_post-flight	2.21592	0.0426154	-1.58992	-3.9756
Q8QZT1	Acetyl-CoA acetyltransferase, mitochondrial	Acat1	-0.0567442	-0.384813	-0.416028	-0.382722	0.232017	0.0567442	-0.062404	2.146	1.21664	1.5436	+	control_post-flight	2.26424	0.04432	-1.55996	-4.04871
Q8R164	Valacyclovir hydrolase	Bphl	0.0442628	-1.11926	-0.345281	0.0599983	-0.0442628	-0.238287	-0.388585	1.8622	1.40932	1.39955	+	control_post-flight	3.21108	0.0413333	-1.78074	-6.30851
Q8VDD5;F2Z494;Q8BXF2	Myosin-9	Myh9	0.636549	-0.169594	0.169594	-0.214038	1.77781	1.10839	1.17117	-0.54666	-0.777837	-1.3516	+	control_post-flight	2.65911	0.0190769	2.24449	5.33582
Q8VDK1;D3Z3I3;D3YY53;D3Z2Y2	Nitrilase homolog 1	Nit1	-0.290517	-0.526315	-0.266355	0.137064	-0.86759	0.0591125	-0.0591125	1.6791	1.45731	1.68702	+	control_post-flight	2.49063	0.0373846	-1.89701	-4.73331
Q8VDN2;D3YYN7;Q3UHK5;Q6PIE5;A0A0G2JGX4;Q8VCE0;Q6PIC6;Q9WV27;Q91WH7;E9QNX7;Q64436;Q9Z1W8	Sodium/potassium-transporting ATPase subunit alpha-1	Atp1a1	1.04343	-0.029426	-0.00411103	0.00411103	0.969593	0.461519	1.16316	-1.77043	-1.03371	-1.09606	+	control_post-flight	2.62776	0.0165333	2.16482	5.21284
Q91VA0;D3Z106;D3YV36	Acyl-coenzyme A synthetase ACSM1, mitochondrial	Acsm1	0.0660736	-0.422669	-0.783334	-1.09138	0.432747	-0.0660736	-0.252598	1.34959	1.68081	1.45269	+	control_post-flight	2.51965	0.0326061	-1.45634	-4.45669
Q91YP0	L-2-hydroxyglutarate dehydrogenase, mitochondrial	L2hgdh	-0.0099521	0.334804	0.814552	-0.849334	0.259118	0.0099521	0.540615	-1.59011	-1.21051	-1.77473	+	control_post-flight	2.86617	0.0248	1.79501	5.506
Q9CQX2	Cytochrome b5 type B	Cyb5b	0.0812873	0.391096	0.613607	0.531	-0.0812873	-0.109119	0.765916	-1.84165	-1.27762	-1.59775	+	control_post-flight	2.22741	0.0442667	1.76418	4.09945
Q9CZN7	Serine hydroxymethyltransferase	Shmt2	0.0649194	-0.71798	-0.317907	-0.850291	-0.935393	0.00912577	-0.00912577	1.48768	1.42458	1.59325	+	control_post-flight	2.34196	0.0365	-1.81364	-4.36286
Q9D0F3;D3Z5B9	Protein ERGIC-53	Lman1	0.127672	-0.148808	-0.097589	0.097589	1.3904	1.10092	0.842819	-1.4581	-0.630186	-1.60117	+	control_post-flight	2.62534	0.0177143	2.3412	5.30304
Q9D1Q6	Endoplasmic reticulum resident protein 44	Erp44	1.04317	0.123605	-0.655943	-0.174932	1.21395	1.4818	1.65683	-0.819861	-0.123605	-0.577684	+	control_post-flight	2.90148	0.0177143	1.95791	5.73648
Q9DB05;P28663	Alpha-soluble NSF attachment protein	Napa	0.886083	-0.155173	0.151981	-0.151981	1.01395	1.00819	0.428414	-1.98229	-0.736639	-1.20184	+	control_post-flight	2.17229	0.0427273	2.12377	4.14757
Q9JHI5	Isovaleryl-CoA dehydrogenase, mitochondrial	Ivd	-0.629218	0.0510271	-0.0510271	0.387105	-0.673197	-0.359673	-0.21909	1.80288	0.99005	1.89417	+	control_post-flight	2.47396	0.0405	-1.97969	-4.74552

## Sheet: only_control_post-flight
			normalized (Z-score)
Protein IDs	Protein names	Gene names	LFQ intensity f01	LFQ intensity f02	LFQ intensity f03	LFQ intensity f04	LFQ intensity k01	LFQ intensity k02	LFQ intensity k03	LFQ intensity P01	LFQ intensity P02	LFQ intensity P03	Student's T-test Significant control_post-flight	Student's T-test significant	-Log Student's T-test p-value control_post-flight	Student's T-test q-value control_post-flight	Student's T-test Difference control_post-flight	Student's T-test Test statistic control_post-flight
			#!{C:Group1}flight	flight	flight	flight	control	control	control	post-flight	post-flight	post-flight
A0A0R4IZY2;Q8CIM7;Q6P8N9	Cytochrome P450 2D26	Cyp2d26	-0.0311881	0.0311881	-0.147614	-0.367109	1.26415	1.73951	1.14268	0.0573922	-1.208	-1.20385	+	control_post-flight	2.03854	0.0473571	2.16693	3.87786
Q9WUD0;G3X8Q9;P12791;A6H6J2	Cytochrome P450 2B10	Cyp2b10	-0.456803	0.402319	0.101291	0.253434	-1.67693	-1.50852	-1.79759	-0.101291	0.448555	0.156342	+	control_post-flight	3.28084	0.062	-1.82888	-6.54121
O88451	Retinol dehydrogenase 7	Rdh7	-0.97219	-0.231606	0.413127	0.231606	0.983338	0.725189	1.19681	-1.61616	-0.833116	-1.24323	+	control_post-flight	2.94481	0.0248	2.19928	6.04103
P09055	Integrin beta-1	Itgb1	0.691461	-0.478493	0.232959	-0.232959	1.23798	0.775617	1.05965	-1.95146	-0.50315	-0.930573	+	control_post-flight	2.05722	0.0421818	2.15281	3.91255
Q52JJ6;P16406;F7B9G4;F6YHW2	Glutamyl aminopeptidase	Enpep	0.783787	-0.475611	0.146981	-0.660812	1.21906	1.02881	1.60597	-1.20666	-0.146981	-1.04876	+	control_post-flight	2.30681	0.0385143	2.08541	4.42584
Q3UKR1;P28654	Decorin	Dcn	0.0262256	-0.701679	0.946364	-0.0262256	2.00764	1.55763	0.889759	-0.13475	-0.577979	-0.0997296	+	control_post-flight	2.09012	0.047746	1.75583	3.82227
Q542X7;P80314	T-complex protein 1 subunit beta	Cct2	1.1187	-0.299242	0.0846877	-0.143345	1.67745	1.4238	1.30966	-0.0846877	-0.834108	-0.609977	+	control_post-flight	2.8797	0.0155	1.97989	5.70157
Q02788;D3Z7D5	Collagen alpha-2(VI) chain	Col6a2	0.969785	-0.513299	0.513299	-0.850545	1.31673	0.782629	0.714424	-1.71688	-0.773008	-0.638134	+	control_post-flight	2.15293	0.0452245	1.9806	4.0493
Q07417	Short-chain specific acyl-CoA dehydrogenase, mitochondrial	Acads	1.04602	0.30287	-0.978445	-0.344511	-0.30287	-0.726159	-0.485891	1.91326	1.18026	0.910683	+	control_post-flight	2.32522	0.0356098	-1.83971	-4.34249
Q2HZ94;Q61830	Macrophage mannose receptor 1	Mrc1	0.888289	-0.773022	-0.29744	0.18238	1.77173	1.15824	1.15711	-1.15023	-0.56203	-0.18238	+	control_post-flight	2.33737	0.0356471	1.99391	4.4498
Q3TL44	NLR family member X1	Nlrx1	-0.250761	1.14048	-0.525864	0.113994	-1.2565	-1.17252	-0.113994	1.35239	1.00425	1.24211	+	control_post-flight	2.23405	0.0413023	-2.04725	-4.24987
Q9D1Q6	Endoplasmic reticulum resident protein 44	Erp44	1.04317	0.123605	-0.655943	-0.174932	1.21395	1.4818	1.65683	-0.819861	-0.123605	-0.577684	+	control_post-flight	2.90148	0.0177143	1.95791	5.73648
																				Protein names	Uniprot ID	Gene names	Elevated (+) or decreased (-) in post-flight	Student's t-test q-value
																				Cytochrome P450 2D26	Q8CIM7	Cyp2d26	-	0.0473571
																				Cytochrome P450 2B10	Q9WUD0	Cyp2b10	+	0.062
																				Retinol dehydrogenase 7	O88451	Rdh7	-	0.0248
																				Integrin beta-1	P09055	Itgb1	-	0.0421818
																				Glutamyl aminopeptidase	Q52JJ6	Enpep	-	0.0385143
																				Decorin	Q3UKR1	Dcn	-	0.047746
																				T-complex protein 1 subunit beta	Q542X7	Cct2	-	0.0155
																				Collagen alpha-2(VI) chain	Q02788	Col6a2	-	0.0452245
																				Short-chain specific acyl-CoA dehydrogenase, mitochondrial	Q07417	Acads	+	0.0356098
																				Macrophage mannose receptor 1	Q2HZ94	Mrc1	-	0.0356471
																				NLR family member X1	Q3TL44	Nlrx1	+	0.0413023
																				Endoplasmic reticulum resident protein 44	Q9D1Q6	Erp44	-	0.0177143

## Sheet: flight_post-flight
			normalized (Z-score)
Protein IDs	Protein names	Gene names	LFQ intensity f01	LFQ intensity f02	LFQ intensity f03	LFQ intensity f04	LFQ intensity k01	LFQ intensity k02	LFQ intensity k03	LFQ intensity P01	LFQ intensity P02	LFQ intensity P03	Student's T-test Significant control_post-flight	Student's T-test significant	-Log Student's T-test p-value flight_post-flight	Student's T-test q-value flight_post-flight	Student's T-test Difference flight_post-flight	Student's T-test Test statistic flight_post-flight
			flight	flight	flight	flight	control	control	control	post-flight	post-flight	post-flight
J3QQ16;A0A087WS16;E9PWQ3;D3YWD1		Col6a3	0.976678	-0.233488	0.233488	-0.483178	1.50989	0.714382	0.982105	-1.41813	-0.881441	-1.07747	+	flight_post-flight	1.57569	0.0363964	1.24905	2.48972
A0A087WS46;O70251;M0QWK5;M0QWH8;G3UX43;G3UZ47	Elongation factor 1-beta	Eef1b2;Eef1b	-1.033	-0.735075	-1.73934	-0.119913	-0.0571094	0.0571094	0.357002	1.3881	0.845051	1.25617	+	flight_post-flight	2.35619	0.0111456	-2.06994	-3.9741
A0A0A0MQ68;Q60759;D3Z4I2	Glutaryl-CoA dehydrogenase, mitochondrial	Gcdh	-0.0726065	-0.225387	-0.815811	-0.192473	-0.166655	0.0726065	0.0838718	1.87467	1.23214	1.78009	+	flight_post-flight	3.19379	0.00566667	-1.95553	-5.4548
Q5M9K9;A0A0A6YX26;P62900;A0A0A6YXL3	60S ribosomal protein L31	Rpl31	-0.596491	-0.473272	-0.948449	-0.0793659	0.0858471	0.0793659	-0.907029	1.78456	1.46185	1.16461	+	flight_post-flight	3.2248	0.0068	-1.99474	-5.54601
A0A0N4SUN2;Q9JJL3	Solute carrier organic anion transporter family member 1B2	Slco1b2	-0.0164512	0.0164512	0.396143	0.174064	0.510866	-0.286709	0.167274	-2.07353	-0.520476	-1.96739	+	flight_post-flight	1.91402	0.0187358	1.66302	3.11614
A0A0N4SVT3;A0A0N4SW28;Q9DAS9	Guanine nucleotide-binding protein G(I)/G(S)/G(O) subunit gamma-12	Gng12	0.454568	-0.0626561	0.167257	0.0626561	-0.111135	0.143758	1.27301	-2.34806	-0.936655	-0.844547	+	flight_post-flight	1.80099	0.0240949	1.53188	2.90427
A0A0R4J023;Q9JLZ3;F6RT60;F6R307;A0A0R4J1L8;E9Q6L3;E9QMT1	Methylglutaconyl-CoA hydratase, mitochondrial	Auh	-0.797198	-0.148626	-1.07632	1.14781	-0.328369	-0.17159	0.148626	1.22103	1.22326	1.64918	+	flight_post-flight	1.34153	0.0499895	-1.58307	-2.26838
A0A0R4J083;P51174	Long-chain specific acyl-CoA dehydrogenase, mitochondrial	Acadl	0.394749	-1.34035	-1.74637	-1.2421	0.193036	-0.193036	-0.809424	0.914355	0.415286	0.846657	+	flight_post-flight	1.51054	0.0339939	-1.70895	-2.5362
S4R2E1;A0A0R4J0B6;Q7TMS5;D3YZX5;S4R2M4;A0A0N4SWA2;D3Z150;D3YVG8	ATP-binding cassette sub-family G member 2	Abcg2	0.252224	0.729481	0.449348	0.221105	-0.221105	-0.466182	0.422581	-2.07514	-0.688731	-1.71117	+	flight_post-flight	2.42215	0.0106	1.90472	4.02032
A0A0R4J0I1;P07759;Q03734;E9Q499;F2Z405;G3X8T9;P29621;Q91WP6;Q5I2A0;Q80X76	Serine protease inhibitor A3K	Serpina3k	0.21733	0.164161	0.0586274	0.139711	-0.24372	-0.10299	0.312041	-1.77804	-0.0586274	-2.36022	+	flight_post-flight	1.35039	0.0492348	1.54392	2.27253
E9QN08;A0A0R4J1L2;Q91VK2;Q80T06;P57776;F6ZFU0;A0A0R4J1E2;D3Z7N2;D3YUQ9;D3YZT9;D3YY68	Elongation factor 1-delta	Eef1d	-0.408857	-0.84317	-0.58703	0.662929	-0.682214	-0.274728	0.274728	1.51483	1.10642	1.78958	+	flight_post-flight	2.04814	0.0127485	-1.76431	-3.35666
Q6ZWZ4;A0A140T8K6;P47964	60S ribosomal protein L36	Rpl36	0.0454594	-0.419005	-2.29443	-1.06209	-0.0454594	1.02831	-0.0968588	0.770911	0.612068	0.626174	+	flight_post-flight	1.34851	0.0486472	-1.60224	-2.28211
Q5M9M5;A0A140T8M7;P62751;D3YTY6	60S ribosomal protein L23a	Rpl23a	-0.302518	-0.174128	-0.304936	0.0749538	-0.21445	0.273563	-0.0749538	2.03246	1.69767	1.28067	+	flight_post-flight	3.49757	0.00833333	-1.84693	-5.95071
A2ACG7;Q9DBG6	Dolichyl-diphosphooligosaccharide--protein glycosyltransferase subunit 2	Rpn2	-0.213621	0.293242	0.386336	0.587475	0.213621	0.827171	-0.370432	-1.70817	-0.882423	-1.95203	+	flight_post-flight	2.48342	0.0111579	1.77756	4.06188
A2AP31;Q3UIU2;A2AP32	NADH dehydrogenase [ubiquinone] 1 beta subcomplex subunit 6	Ndufb6	0.212123	-0.164342	0.164342	-0.407067	0.368403	0.854579	0.373175	-1.49601	-1.09693	-2.07092	+	flight_post-flight	2.43957	0.0113846	1.50588	3.83401
V9GWU5;Q3TAI4;A2AUD5;Q9CYZ2;F6VQ81;Q3TUJ9;Q8BKP1	Tumor protein D54	Tpd52l2	-0.216588	0.831515	0.515801	0.83536	0.216588	-1.31654	1.69776	-1.04729	-0.521847	-1.12521	+	flight_post-flight	2.05914	0.0172653	1.38964	3.20834
A2AVJ7;Q99PL5	Ribosome-binding protein 1	Rrbp1	-1.97701	-0.785559	-0.519116	-0.341797	0.06857	-0.06857	1.2528	1.45243	0.571484	0.270107	+	flight_post-flight	1.60396	0.0291579	-1.67054	-2.66248
A2RSV8;P19783;M0QWX7;D6RG40	Cytochrome c oxidase subunit 4 isoform 1, mitochondrial	Cox4i1	-0.03393	-0.110392	0.119737	0.23168	0.03393	0.143793	1.12511	-1.95347	-0.469015	-1.89603	+	flight_post-flight	1.80054	0.0247843	1.49128	2.88873
A2RTT4;P61089	Ubiquitin-conjugating enzyme E2 N	Ube2n	-0.847484	-0.0416906	-0.291013	-0.73229	0.976802	0.102104	-0.51907	1.59674	0.0416906	1.96819	+	flight_post-flight	1.57181	0.0305641	-1.68033	-2.61833
A4FUS1;P14131	40S ribosomal protein S16	Rps16	-1.17785	0.507729	-1.35326	-0.596492	-0.33389	0.41256	-1.36795	1.47375	0.855208	0.33389	+	flight_post-flight	1.37637	0.0466775	-1.54258	-2.30849
Q5FWB7;A6ZI44;P05064;Q9CPQ9;A6ZI46;A0A0U1RPN8;D3YWI1;D3Z510;D3YV98;A0A0U1RPT5;A6ZI47	Fructose-bisphosphate aldolase;Fructose-bisphosphate aldolase A	Aldoa;Aldoart1	-0.605275	-0.691402	-1.36814	-0.0887708	0.404241	0.719858	-0.713342	1.86184	0.0887708	1.2693	+	flight_post-flight	1.66316	0.0267437	-1.7617	-2.77211
B1AV77;B1ATI0;P47740;A0A140LJF9;P47739	Aldehyde dehydrogenase;Fatty aldehyde dehydrogenase	Aldh3a2	0.491426	1.03952	0.95504	0.813948	-0.560215	-0.491426	0.828985	-1.47958	-0.657899	-1.49624	+	flight_post-flight	3.17327	0.00591304	2.03622	5.475
B1AU25;Q9Z0X1	Apoptosis-inducing factor 1, mitochondrial	Aifm1	0.193426	0.401543	1.00945	0.603456	-0.318	-1.09476	0.602139	-1.90739	-0.193426	-1.44239	+	flight_post-flight	1.83038	0.0198957	1.73303	3.01368
B2M1R6;P61979;H3BLL4;H3BK96;H3BKD0;H3BKI8;H3BJS9;H3BJ43;Q8BT23;H3BLP7	Heterogeneous nuclear ribonucleoprotein K	Hnrnpk	0.673038	0.159031	-0.844818	-1.2517	-1.21758	-0.159031	-0.28042	1.14269	0.859731	1.61553	+	flight_post-flight	1.38793	0.0458082	-1.5221	-2.31993
B2RS41;Q8BWF0	Succinate-semialdehyde dehydrogenase, mitochondrial	Aldh5a1	-1.1268	-0.364936	-0.0659921	0.0659921	-0.21715	-0.430124	0.161264	1.70894	0.82941	1.92921	+	flight_post-flight	2.15514	0.0125135	-1.86212	-3.5616
B2RSR0;Q9DBW0;H9H9R5	Cytochrome P450 4V2	Cyp4v3;Cyp4v2	0.135072	1.01897	0.704051	0.752321	0.388097	-0.504378	-0.135072	-1.28157	-0.319807	-2.17113	+	flight_post-flight	1.91302	0.01752	1.91011	3.19199
B2RVD5;B2RTK3;Q8CBB6;Q8CGP2;Q8CGP1;Q6ZWY9;Q64525;Q64478;Q64475;P10854;P10853;Q9D2U9;Q8CGP0;Q64524;P70696	Histone H2B;Histone H2B type 1-P;Histone H2B type 1-K;Histone H2B type 1-C/E/G;Histone H2B type 2-B;Histone H2B type 1-H;Histone H2B type 1-B;Histone H2B type 1-M;Histone H2B type 1-F/J/L;Histone H2B type 3-A;Histone H2B type 3-B;Histone H2B type 2-E;Histone H2B type 1-A	Hist1h2bk;Hist1h2bm;Hist1h2br;Hist1h2bp;Hist1h2bc;Hist2h2bb;Hist1h2bh;Hist1h2bb;Hist1h2bf;Hist3h2ba;Hist3h2bb;Hist2h2be;Hist1h2ba	-1.21843	-0.153485	-1.45948	0.0118075	-0.0118075	0.776443	-0.236372	1.32898	1.15232	1.26837	+	flight_post-flight	2.16678	0.0126993	-1.95478	-3.61331
B2RTM0;P62806	Histone H4	Hist2h4;Hist1h4a	-1.10877	0.00428246	-1.17092	-0.0187287	-0.0912855	0.848856	-0.00428246	1.61347	1.37528	1.08425	+	flight_post-flight	2.28645	0.0111933	-1.9312	-3.80297
B2RVP5;Q3THW5;P0C0S6;Q8R029;Q3UA95;G3UWL7	Histone H2A;Histone H2A.V;Histone H2A.Z	H2afv;H2afz	-0.968792	-0.0197169	-1.24518	-0.0241797	0.0197169	1.32684	-0.581872	0.94476	0.587139	1.78135	+	flight_post-flight	1.75487	0.0248803	-1.66889	-2.88224
B2RXM2;J3QNY1;A2AL12;Q8BG05;V9GX38	Heterogeneous nuclear ribonucleoprotein A3	Gm6793;Gm9242;Hnrnpa3	0.31154	-1.83242	-0.977801	-0.858862	-0.869598	-0.178531	0.178531	1.198	1.02434	0.739609	+	flight_post-flight	1.72757	0.0247287	-1.8267	-2.88461
B2RXW1;P35492;F8WH73	Histidine ammonia-lyase	Hal	-0.490408	-0.28743	-1.10498	-0.0691178	0.472919	0.132935	-0.0356624	2.14481	0.0356624	1.61464	+	flight_post-flight	1.50203	0.0340848	-1.75302	-2.53328
B6VGH4;P00186	Cytochrome P450;Cytochrome P450 1A2	Cyp1a2	-0.0267548	0.568425	0.434687	0.0267548	0.40813	-0.732657	0.228299	-1.96403	-0.937241	-1.73067	+	flight_post-flight	2.64418	0.0117297	1.79476	4.34248
B9EHY2;Q80W54;I7HIP5	CAAX prenyl protease 1 homolog	Zmpste24	0.725965	-0.12302	0.604571	-0.399506	0.12302	0.147428	0.721847	-2.04105	-0.980311	-1.49931	+	flight_post-flight	2.04215	0.0143371	1.70889	3.32687
D3YWT0;D3Z569;D3YTS1;Q9R0P6	Signal peptidase complex catalytic subunit SEC11;Signal peptidase complex catalytic subunit SEC11A	Sec11a	0.471186	0.506724	0.443384	-0.0266629	0.0266629	0.251964	-0.469076	-1.94512	-1.20611	-1.67377	+	flight_post-flight	3.39792	0.00666667	1.95699	5.85931
D3YUM1;Q91YT0;D3Z1U9;D3Z0K1;D3YXX5;D6RG60	NADH dehydrogenase [ubiquinone] flavoprotein 1, mitochondrial	Ndufv1	1.24524	0.837457	1.11086	1.64027	-0.810057	-0.0163914	0.0163914	-1.10409	-0.0211512	-0.973323	+	flight_post-flight	2.5641	0.0116456	1.90798	4.26563
D3YVV1;Q8VEK0;Q0VEI2;Q8BHG3	Cell cycle control protein 50A	Tmem30a	0.329489	0.00979816	0.0704405	-0.00979816	0.0384968	-0.469157	0.739929	-1.93266	-1.21791	-1.70256	+	flight_post-flight	3.46107	0.00625	1.71769	5.74182
D3YYM6;Q91V55;P97461	40S ribosomal protein S5;40S ribosomal protein S5, N-terminally processed	Rps5	-1.19108	-0.752676	-0.605441	-0.364638	0.428576	1.79798	0.364638	1.26208	1.10471	-0.390742	+	flight_post-flight	1.44729	0.0421222	-1.38714	-2.36622
E9Q3B9;D3YYS6;O35678;Q3UFN1	Monoglyceride lipase	Mgll	0.855251	0.102851	0.0320833	0.154989	-0.0640642	0.880211	-0.0320833	-1.91815	-1.21669	-1.5144	+	flight_post-flight	2.88589	0.00857143	1.83604	4.79216
D3YZ54;Q9QXE0;E9PWM4;E9Q0K0;E9Q7H7;E9Q9L4;D6RDE9	2-hydroxyacyl-CoA lyase 1	Hacl1	-0.202853	-0.628242	-0.432374	-0.369925	0.038428	1.58794	-0.038428	0.92038	1.14688	1.88506	+	flight_post-flight	2.89488	0.009	-1.72579	-4.7292
D3Z041;P41216;D3Z457;D3YVF6;F6WNZ2	Long-chain-fatty-acid--CoA ligase 1	Acsl1	0.652883	1.34799	0.96284	0.926952	-0.288159	-0.657848	0.288159	-1.47122	-0.569632	-1.37207	+	flight_post-flight	3.09713	0.00523077	2.11031	5.37428
D3Z1M3;Q6ZQI3	Malectin	Mlec	-0.00436854	0.629643	0.86364	0.720171	-0.923676	0.00436854	0.178053	-1.90589	-0.5291	-1.59428	+	flight_post-flight	2.21619	0.0130746	1.89536	3.67312
E0CX98;Q9D2C7;E0CZE8;E0CXR0	Bax inhibitor 1	Tmbim6	0.560553	0.904345	0.744402	-0.565489	0.216641	-0.216641	0.801738	-0.257056	-1.57598	-1.92551	+	flight_post-flight	1.45644	0.0385882	1.6638	2.4484
E0CXB5;F6TFF2;Q8R143	Pituitary tumor-transforming gene 1 protein-interacting protein	Pttg1ip	-0.16187	-0.11335	0.349188	0.505613	0.149234	0.11335	0.531065	-2.12845	-1.86021	-0.524918	+	flight_post-flight	1.80447	0.0219504	1.64942	2.94917
E9Q035;F7BAE9;P47758;E9Q2Q7;D3YYR8;F7CJN9;E9Q939;CON__Q2HJF0		Gm20425	0.0873166	-0.171054	0.393214	0.379093	0.0496869	0.526592	-0.0496869	-2.39475	-0.702653	-1.46765	+	flight_post-flight	1.92408	0.0177033	1.69383	3.14194
E9QNH6;E9Q580;Q7TQD7;P46735;D3YV80;E9PVB9;A0A0J9YUC4;E9PWM9;Q9D6A1;O88329	Unconventional myosin-Ib	Myo1b	0.510572	0.1064	-0.105527	0.105527	0.795793	0.655839	-1.26646	-1.97392	-1.20935	-0.824327	+	flight_post-flight	2.24938	0.0122649	1.49011	3.53839
E9Q5B6;F6ZV59;G5E8G0;G3X9W0;Q60668;A0A0G2JFL4;F6SHF3;F6VQH5;D3YTQ3;Q9D3U4;Q9Z130	Heterogeneous nuclear ribonucleoprotein D0	Hnrnpd	-0.92875	0.0256477	-0.0600734	-0.430076	-1.31623	-0.0256477	0.257185	1.31754	1.5198	1.45025	+	flight_post-flight	2.97663	0.00808889	-1.77751	-4.91248
Q5M8Q0;E9QAZ2;Q9CZM2;B8JKK2	Ribosomal protein L15;60S ribosomal protein L15	Rpl15;Gm10020	-0.174633	0.161983	-0.161983	-1.16388	-0.416893	0.624297	-2.16145	0.93207	0.822073	0.884558	+	flight_post-flight	1.79117	0.0266056	-1.2142	-2.75426
E9QKK8;F6Q8D3;Q9QZW0;E9Q3G7;P98197;F6Z4J2;Q6DFW5;D6RII8;A0A0G2JE89	Phospholipid-transporting ATPase;Phospholipid-transporting ATPase 11C	Atp11c	0.885476	0.326941	0.57689	0.0916123	0.039331	-0.039331	-0.11809	-1.85315	-0.585206	-1.99354	+	flight_post-flight	2.22483	0.0130462	1.94753	3.7066
E9QN99;A0A087WPF8;A0A087WQN8;A0A087WSR2;Q8VCR7;A0A087WRJ2;A0A087WP24	Alpha/beta hydrolase domain-containing protein 14B	Abhd14b	-0.551102	-0.858431	-0.654846	-0.834347	0.672605	-0.131649	0.131649	1.45665	0.275426	2.03707	+	flight_post-flight	2.18546	0.0132555	-1.98107	-3.65311
E9QPX3;Q9CXZ1	NADH dehydrogenase [ubiquinone] iron-sulfur protein 4, mitochondrial	Ndufs4	0.00421566	0.350944	0.193539	0.237578	-0.0908475	-0.00421566	1.03261	-2.58938	-0.720983	-0.69544	+	flight_post-flight	1.46193	0.0387586	1.53184	2.42542
F6SVV1;Q4FZE6;P62082	40S ribosomal protein S7	Gm9493;Rps7	-1.04063	0.84512	-0.00507851	-0.186025	0.00507851	-0.356251	-0.913916	1.13325	1.71562	1.40657	+	flight_post-flight	1.60289	0.0304665	-1.51513	-2.61816
F6YTZ4;Q58EU3;P25444;A0A140T8L5;D3YVC1;E9Q1N8;J3QMG5;D3YWJ3;D3Z536	40S ribosomal protein S2	Gm6576;Rps2;Gm18025;Gm5786	-0.194582	-0.261847	-0.280132	0.194582	-0.818387	0.398857	-1.09509	1.59506	1.3201	1.56917	+	flight_post-flight	3.92727	0	-1.63027	-6.49518
F6ZHD8;Q9D6Y9;G3UW30	1,4-alpha-glucan-branching enzyme	Gbe1	1.17725	0.017293	0.945757	0.910707	-0.017293	-1.28866	1.40711	-0.248986	-1.33465	-0.636964	+	flight_post-flight	1.86945	0.0208205	1.50295	2.9913
S4R1E5;F7A8H6;O70325;Q91XR9	Glutathione peroxidase;Phospholipid hydroperoxide glutathione peroxidase, mitochondrial;Phospholipid hydroperoxide glutathione peroxidase, nuclear	Gpx4	-0.213726	0.322638	1.25238	0.515634	0.213726	-0.71016	0.629842	-1.27657	-1.92896	-0.847748	+	flight_post-flight	2.02555	0.0134318	1.82032	3.34095
G3UXG7;G3UZJ5;P67871;G3UZA4;G3UXU2;G3UZX4	Casein kinase II subunit beta	Csnk2b	0.700554	0.306328	0.237824	-0.825209	1.04785	-0.237824	0.565382	-1.88484	-1.23866	-1.05678	+	flight_post-flight	1.71922	0.0267491	1.4983	2.77634
G5E814;Q9D8B4	NADH dehydrogenase [ubiquinone] 1 alpha subcomplex subunit 11	Ndufa11	0.356456	0.0586827	0.275128	-0.67104	0.132339	-0.0586827	1.24767	-1.43439	-0.797363	-2.01807	+	flight_post-flight	1.76914	0.0259775	1.42141	2.81789
Q564E2;G5E8N5;P06151;D3Z736;D3YZQ9;D3YVR7;D3YZE4;Q548Z6;P00342;A0A0N4SVV8;D3Z7F0;P16125	L-lactate dehydrogenase;L-lactate dehydrogenase A chain	Ldha	-0.684093	-0.476932	-1.02013	-0.169836	0.260958	0.169836	-1.37938	1.58035	0.210245	1.64125	+	flight_post-flight	1.94133	0.0174328	-1.7317	-3.18097
I7HLV2;Q6ZWV3;P86048;B7FAU6	60S ribosomal protein L10;60S ribosomal protein L10-like	Rpl10;Rpl10l	0.107087	-0.62224	-0.842147	-0.931896	-0.102381	0.207574	-0.562877	2.12485	1.45871	0.102381	+	flight_post-flight	1.59856	0.0292617	-1.80095	-2.68555
O08601	Microsomal triglyceride transfer protein large subunit	Mttp	0.825171	0.485931	0.924428	0.782771	-0.482664	0.132122	-0.132122	-1.93687	-0.651498	-1.47373	+	flight_post-flight	2.835	0.00774468	2.10861	4.8621
O09173	Homogentisate 1,2-dioxygenase	Hgd	-0.203421	-0.842516	-0.660554	0.0563626	0.00489522	-0.423798	0.213387	2.02942	-0.00489522	1.8616	+	flight_post-flight	1.4501	0.0387021	-1.70791	-2.44859
O09174	Alpha-methylacyl-CoA racemase	Amacr	-0.0526009	-0.688395	0.0526009	-0.572597	-0.978771	-0.0842918	0.770805	1.9846	0.755747	1.45729	+	flight_post-flight	2.24957	0.0131594	-1.71446	-3.65216
O35114	Lysosome membrane protein 2	Scarb2	0.519898	-0.0903165	-0.0535562	0.0535562	0.710386	0.40442	1.06595	-2.36212	-0.735974	-0.888862	+	flight_post-flight	1.56663	0.0336829	1.43638	2.54371
Q3V235;O35129;F6QPR1;F6Q8V7	Prohibitin-2	Phb2	1.03277	0.983826	1.13644	0.520787	0.0236146	-0.481752	-0.0236146	-0.47672	-0.104537	-2.22067	+	flight_post-flight	1.6466	0.026552	1.85243	2.76873
O35423	Serine--pyruvate aminotransferase, mitochondrial	Agxt	-0.158666	-0.161711	-0.206662	-1.66226	0.190508	0.158666	-0.802657	1.82417	0.329125	1.41464	+	flight_post-flight	1.52659	0.0322346	-1.73664	-2.5656
O35459;F7B227	Delta(3,5)-Delta(2,4)-dienoyl-CoA isomerase, mitochondrial	Ech1	-0.141246	-0.628868	-0.606798	0.141246	-1.81837	-1.76501	0.495674	0.516266	0.698068	0.880435	+	flight_post-flight	2.0796	0.0212218	-1.00717	-2.97409
O35488;A2ANX6	Very long-chain acyl-CoA synthetase	Slc27a2	0.839671	0.0769304	0.304568	0.24431	-0.0769304	0.943002	-0.626757	-1.32726	-0.394632	-2.22064	+	flight_post-flight	1.75507	0.0246875	1.68055	2.886
O54734	Dolichyl-diphosphooligosaccharide--protein glycosyltransferase 48 kDa subunit	Ddost	0.0241343	0.544494	0.491181	0.466552	-0.0241343	0.545613	-0.933743	-1.97153	-1.15538	-1.36089	+	flight_post-flight	3.1824	0.00503704	1.87752	5.37066
Q3TXU8;O55022	Membrane-associated progesterone receptor component 1	Pgrmc1	-0.0167619	0.441233	0.923486	0.373201	0.0167619	-0.332714	0.789752	-2.17414	-0.794381	-1.31162	+	flight_post-flight	2.21985	0.0128824	1.857	3.66442
Q6ZWX1;O55142	60S ribosomal protein L35a	Rpl35a	-0.832706	0.117894	-0.924347	-0.117894	-0.481997	0.918506	-0.897129	1.21905	1.54592	1.29136	+	flight_post-flight	2.61642	0.0121053	-1.79137	-4.29315
Q3U6J9;O88531;B1B0P8;B1B0P9	Palmitoyl-protein thioesterase 1	Ppt1	0.228946	0.0946914	0.51659	0.135313	-0.0946914	-0.246647	0.74161	-2.27931	-1.25395	-1.12516	+	flight_post-flight	2.57255	0.0117108	1.79669	4.22167
O88587;D3Z227	Catechol O-methyltransferase	Comt	1.01933	0.66754	0.789186	0.310635	0.774481	-1.37331	-0.797091	-1.28594	-0.310635	-1.38735	+	flight_post-flight	2.39748	0.0117876	1.69132	3.87638
O88844;A0A087WPT4;A0A087WRS9;D3YVY3;A0A087WRM4	Isocitrate dehydrogenase [NADP] cytoplasmic	Idh1	-1.23724	-0.201715	-0.303997	0.251048	0.136477	-0.265301	-0.136477	1.75548	0.618206	1.92395	+	flight_post-flight	1.7996	0.0208983	-1.80552	-2.98808
Q7JCZ1;P00405	Cytochrome c oxidase subunit 2	mt-Co2;Mtco2	0.906608	-0.0571211	-0.283197	0.0571211	0.919044	1.35671	0.446947	-0.791098	-0.914467	-1.93499	+	flight_post-flight	1.60508	0.0323625	1.36937	2.57384
Q7JCY6;P03911	NADH-ubiquinone oxidoreductase chain 4	mt-Nd4;Mtnd4	-0.207093	0.349751	0.207093	0.390225	0.355045	0.552635	-2.08951	-1.1471	-1.5688	-0.255248	+	flight_post-flight	1.6427	0.0337859	1.17538	2.54428
P05201;F7ALS6	Aspartate aminotransferase, cytoplasmic	Got1	-0.00775523	-0.328683	-0.583475	-0.26838	0.00775523	-0.120366	0.298722	1.8137	0.687558	2.14788	+	flight_post-flight	2.26244	0.0127619	-1.84679	-3.72977
P05202	Aspartate aminotransferase, mitochondrial	Got2	-0.352686	-0.0991501	0.047888	0.218145	-0.047888	-0.265862	-0.107449	1.88765	1.24818	1.90006	+	flight_post-flight	3.17634	0.00425	-1.72508	-5.22731
P06801;Q3TQP6	NADP-dependent malic enzyme;Malic enzyme	Me1	1.07384	0.664139	1.15979	0.851365	-0.966084	-1.06404	0.415775	-1.05639	-1.34486	-0.415775	+	flight_post-flight	3.05977	0.00377778	1.87629	5.13902
Q546G4;P07724	Serum albumin	Alb	-0.342126	-0.324497	-0.228752	-0.116248	0.10325	-0.10325	0.557931	0.588585	2.53731	1.26285	+	flight_post-flight	1.79008	0.0218601	-1.71582	-2.94827
P08249;A0A0G2JF23;A0A0G2JGY4	Malate dehydrogenase, mitochondrial	Mdh2	-0.142275	0.0445978	-0.197024	0.036042	-0.036042	-0.134936	-0.258196	1.89432	1.33519	1.86556	+	flight_post-flight	3.8594	0	-1.76302	-6.5619
P09405	Nucleolin	Ncl	-1.98394	-0.238278	-1.42848	-0.178055	0.178055	-0.562081	0.378482	0.581181	0.964726	1.08426	+	flight_post-flight	1.70136	0.0255	-1.83391	-2.84684
Q4FJX9;P09671	Superoxide dismutase;Superoxide dismutase [Mn], mitochondrial	Sod2	-0.127123	-0.0240831	-0.251309	-0.36585	0.0240831	-1.51774	0.176536	0.658692	0.601331	2.37813	+	flight_post-flight	1.43804	0.0422604	-1.40481	-2.35875
P10605	Cathepsin B;Cathepsin B light chain;Cathepsin B heavy chain	Ctsb	-0.598012	-0.560475	-0.0460786	0.0460786	-0.786321	-1.09617	0.392591	1.65189	1.36116	1.32984	+	flight_post-flight	3.30889	0.00618182	-1.73725	-5.48063
P10649;A2AE89	Glutathione S-transferase Mu 1	Gstm1	-0.078464	0.00958602	0.141201	-0.100142	-0.00958602	-0.73548	-0.738005	1.58407	0.98038	2.09945	+	flight_post-flight	2.60501	0.0114607	-1.56159	-4.12879
P11352;A0A0A6YVV2;A0A0A6YY34	Glutathione peroxidase 1;Glutathione peroxidase	Gpx1	-0.834839	-1.15887	-1.7245	-0.0630439	0.043133	0.144336	0.687277	1.58349	-0.043133	0.988871	+	flight_post-flight	1.58576	0.0292541	-1.78839	-2.66383
Q3TA96;P11438	Lysosome-associated membrane glycoprotein 1	Lamp1	0.194442	-0.0787945	0.562675	0.418515	0.0787945	-0.443296	0.162044	-2.60568	-0.557986	-1.06505	+	flight_post-flight	1.57681	0.0302323	1.68378	2.62641
Q71LX8;P11499;E9Q3D6;E9Q0C3;E9PX27;D3Z1R1	Heat shock protein HSP 90-beta	Hsp90ab1	-0.261144	-0.773103	-1.8782	-0.936167	0.246646	0.398999	0.0670601	1.81143	-0.0670601	0.647863	+	flight_post-flight	1.46902	0.0365509	-1.75957	-2.48649
P11714	Cytochrome P450 2D9	Cyp2d9	0.119339	0.0842702	0.207416	0.0515671	-0.0515671	-0.782697	0.110198	-1.92348	-0.940629	-1.92899	+	flight_post-flight	2.7879	0.0117288	1.71335	4.53589
Q543H3;P11725;Q8R1A8	Ornithine carbamoyltransferase, mitochondrial	Otc	-0.556663	-0.0105954	-0.509675	0.664662	0.0105954	-0.523745	-1.079	1.47745	0.92978	1.87148	+	flight_post-flight	1.88177	0.0200702	-1.52931	-3.01935
Q3V2F7;P12710	Fatty acid-binding protein, liver	Fabp1	0.158163	0.502559	0.813106	0.910714	-0.158163	-1.55687	0.389962	-1.22262	-1.42982	-1.04488	+	flight_post-flight	3.3706	0.008	1.82858	5.68619
P12815	Programmed cell death protein 6	Pdcd6	0.0316128	0.330282	-0.0316128	-0.364723	1.31348	0.905097	0.324553	-0.548982	-1.12799	-2.12894	+	flight_post-flight	1.51673	0.0396571	1.26003	2.41693
Q58ET1;P12970;A0A140T8L1;A0A140T8L3;F6VBB8;V9GX35	60S ribosomal protein L7a	Rpl7a	-0.1094	-0.266841	-1.00288	-0.281194	0.1094	0.364883	-0.451226	2.04508	1.43789	1.11059	+	flight_post-flight	2.70548	0.0115333	-1.94626	-4.53532
Q545P0;P14094;A0A0A6YX05	Sodium/potassium-transporting ATPase subunit beta-1	Atp1b1	0.420665	-0.0577266	0.360021	0.301725	0.0577266	-0.276863	0.905926	-2.33863	-0.943308	-1.1573	+	flight_post-flight	2.19926	0.0126849	1.73592	3.58215
P14115	60S ribosomal protein L27a	Rpl27a	0.183221	-0.441417	-0.463757	-1.1785	-0.183221	0.695323	-0.762221	1.95851	0.905888	1.18879	+	flight_post-flight	2.12596	0.0123613	-1.82618	-3.50167
Q5M9N8;P14148;F6XI62	60S ribosomal protein L7	Rpl7	-0.145028	-0.0805197	-0.546755	-1.12424	0.0805197	0.489156	-1.86369	1.19469	1.03986	1.08717	+	flight_post-flight	2.57277	0.0112088	-1.58137	-4.09115
P14206	40S ribosomal protein SA	Rpsa	-1.71851	-0.369526	-0.587473	0.536509	-1.21748	0.369526	-0.422373	0.868061	1.29168	1.02861	+	flight_post-flight	1.45199	0.0388703	-1.59753	-2.42724
P14824;F8WIT2	Annexin A6;Annexin	Anxa6	0.735694	0.0536747	-0.0536747	-0.588231	0.690629	0.805358	0.779211	-1.63022	-1.51476	-1.19253	+	flight_post-flight	2.13794	0.012071	1.4827	3.37025
P16332	Methylmalonyl-CoA mutase, mitochondrial	Mut	-0.160121	-0.173055	-0.395343	-0.394213	-0.639814	0.363032	0.160121	2.36317	0.999362	1.21762	+	flight_post-flight	2.38221	0.012	-1.8074	-3.9091
Q3UJ34;P16460;J3QNG0	Argininosuccinate synthase	Ass1;Gm5424	0.16743	-0.16743	0.173308	-0.32354	-0.768293	-0.352331	-1.6974	1.5138	0.286029	1.68531	+	flight_post-flight	1.5323	0.0396809	-1.19927	-2.41363
P16546;A3KGU5;A3KGU7;E9Q447;A3KGU9;A3KGU4	Spectrin alpha chain, non-erythrocytic 1	Sptan1	-1.26347	-0.250384	-1.3659	-0.222248	-0.69009	0.966556	1.65961	0.862659	0.222248	0.683767	+	flight_post-flight	1.71251	0.0273562	-1.36506	-2.71789
Q5FW97;P17182;Q6PHC1;B1ARR7;B0QZL1;A0A0N4SUX5;Q545V3;P17183;D3Z2S4;D3Z6E4;A0A0N4SUI6;B1ARR6;D3YVD3;J3QPZ9;A0A0N4SUW8;Q5SX61;Q5SX60	Alpha-enolase	EG433182;Eno1	0.080641	-0.706715	-1.26847	-0.147631	0.785064	-0.300226	-0.080641	1.74935	0.225833	1.74328	+	flight_post-flight	1.5985	0.0289701	-1.75003	-2.67387
Q5SVY2;P17742;F8VPN3;V9GXC1;V9GX31	Peptidyl-prolyl cis-trans isomerase;Peptidyl-prolyl cis-trans isomerase A;Peptidyl-prolyl cis-trans isomerase A, N-terminally processed	Ppia	-1.12119	-0.689746	-0.0712019	-0.109128	0.0712019	-1.51049	0.567873	1.16024	0.428204	1.76396	+	flight_post-flight	1.84387	0.0206867	-1.61528	-2.99572
Q3UCD9;P18242;F6Y6L6;F8WIR1	Cathepsin D	Ctsd	0.16469	0.830164	1.04979	0.998236	-0.16469	-0.831573	0.81436	-1.95655	-0.604562	-0.780886	+	flight_post-flight	2.13967	0.0124295	1.87472	3.54122
P19157;P46425;Q8VC73;F6RWR5	Glutathione S-transferase P 1;Glutathione S-transferase P 2	Gstp1;Gstp2	0.824771	0.347995	0.754496	0.734602	0.757836	-1.15195	-0.599916	-1.74042	-0.347995	-1.29552	+	flight_post-flight	2.34753	0.0114828	1.79345	3.84569
Q9D881;P19536;F7C106;A0A0A6YVR0	Cytochrome c oxidase subunit 5B, mitochondrial	Cox5b	0.324302	-0.0232594	0.816785	0.786172	0.0232594	-0.688834	0.672135	-1.52765	-0.184654	-2.07713	+	flight_post-flight	1.66818	0.0268406	1.73914	2.77387
Q543K9;P23492;Q9D8C9	Purine nucleoside phosphorylase	Pnp	-0.230727	-1.87591	-1.57927	-0.0429995	0.487159	0.0429995	-0.31784	0.887568	0.1881	1.32981	+	flight_post-flight	1.42746	0.0390372	-1.73406	-2.42111
P24456	Cytochrome P450 2D10	Cyp2d10	0.41532	-0.151208	0.493669	0.151208	0.479373	0.341184	-0.706784	-2.27735	-1.19778	-1.03504	+	flight_post-flight	2.26882	0.013374	1.73064	3.69003
P26039;F6SX70;E9PUM4;Q71LX4	Talin-1	Tln1	-0.178891	-0.889666	-1.42398	-2.33744	0.0328512	-0.0328512	0.493345	0.510445	0.217188	0.36316	+	flight_post-flight	1.4683	0.0387683	-1.57109	-2.44403
P26443;F7CFA5	Glutamate dehydrogenase 1, mitochondrial	Glud1	-0.63225	-0.0305681	-0.692668	-0.47582	-0.204079	0.201801	0.0305681	2.12842	1.08926	1.44677	+	flight_post-flight	2.88563	0.00791304	-2.01265	-4.904
P27659;A0A087WQK0;A0A087WNS0;Q9CQ09;E9PWZ3	60S ribosomal protein L3	Rpl3	-0.355483	-0.631274	-0.721518	-0.902958	0.355483	1.21492	-1.42478	1.45783	0.510323	1.05884	+	flight_post-flight	2.80889	0.0111613	-1.6618	-4.53423
P27773;F6Q404	Protein disulfide-isomerase A3	Pdia3	-0.273619	-0.080006	0.080006	0.36044	0.384902	0.688034	1.25971	-1.84594	-0.351492	-1.74441	+	flight_post-flight	1.56189	0.0359398	1.33565	2.50383
P29341;Q9D4E6;Q62029;A2A5N3;Q91YZ8;D3Z5M2;A3KFU5;A3KFU8;Q6PHQ9;V9GXG3	Polyadenylate-binding protein 1;Polyadenylate-binding protein	Pabpc1;Pabpc6;Pabpc2	-1.04395	-1.29556	0.402588	-1.83754	-0.86727	-0.00718	0.00718	1.02031	0.883247	0.34593	+	flight_post-flight	1.45231	0.0388166	-1.69344	-2.44877
Q3TG75;P29758	Ornithine aminotransferase, mitochondrial	Oat	-0.302301	0.275736	0.762893	-0.275736	-1.0483	-0.339519	-0.306466	1.70215	1.09101	1.66698	+	flight_post-flight	1.98607	0.0186296	-1.37156	-3.09669
P30115;A0A087WQI6	Glutathione S-transferase A3	Gsta3	-0.688343	0.0110784	-0.501461	-0.610288	1.59313	-0.0920469	0.0320432	1.22702	-0.0110784	1.96186	+	flight_post-flight	1.47983	0.038655	-1.50652	-2.44387
P33267;A0A0U1RPL9	Cytochrome P450 2F2	Cyp2f2	-0.383627	0.920803	0.534249	0.329057	0.116249	0.245529	-0.116249	-1.8195	-0.390674	-2.01512	+	flight_post-flight	1.65611	0.0264028	1.75855	2.76089
Q3UFJ3;P35486	Pyruvate dehydrogenase E1 component subunit alpha;Pyruvate dehydrogenase E1 component subunit alpha, somatic form, mitochondrial	Pdha1	-0.236796	-0.421296	-0.315476	-1.12832	0.296485	-0.48224	1.98273	1.72185	0.34825	0.236796	+	flight_post-flight	1.4056	0.0485426	-1.29444	-2.28267
Q5SUC3;P35564	Calnexin	Canx	-0.374973	0.131222	-0.131222	0.268161	0.160278	0.418249	0.764379	-1.92645	-1.19278	-1.68351	+	flight_post-flight	2.85074	0.0113443	1.57421	4.53496
P35700;B1AXW5;B1AXW6;B1AXW4	Peroxiredoxin-1	Prdx1	0.087351	-0.47418	-0.432235	-0.087351	-0.347833	-0.822394	0.43519	1.50919	0.808591	2.15752	+	flight_post-flight	2.2839	0.0131473	-1.71837	-3.70837
P36552	Oxygen-dependent coproporphyrinogen-III oxidase, mitochondrial	Cpox	0.718722	0.672595	0.581437	0.337741	-0.680953	-0.337741	1.77246	-1.72849	-0.501086	-0.787908	+	flight_post-flight	2.33303	0.0126614	1.58345	3.71696
P38060	Hydroxymethylglutaryl-CoA lyase, mitochondrial	Hmgcl	-0.754345	-0.0296494	-0.483448	-0.119633	-1.25044	1.20122	0.213689	1.80539	0.0296494	1.36731	+	flight_post-flight	1.4676	0.0401364	-1.41422	-2.40161
P38647	Stress-70 protein, mitochondrial	Hspa9	-0.417878	-0.631297	-1.11138	-0.517762	-0.188448	0.188448	0.415231	1.9223	0.798742	1.53197	+	flight_post-flight	2.83637	0.00875	-2.08725	-4.85325
P42125	Enoyl-CoA delta isomerase 1, mitochondrial	Eci1	-0.552247	0.118668	-0.53172	0.561391	-0.118668	-1.57458	-0.15849	0.950914	1.71402	1.31242	+	flight_post-flight	1.92771	0.0198198	-1.42676	-3.04162
P45952;D6RFD7	Medium-chain specific acyl-CoA dehydrogenase, mitochondrial	Acadm	0.921644	-0.130643	0.0133394	-0.297229	-0.0529444	-0.0133394	-0.918079	1.87078	1.07559	1.59449	+	flight_post-flight	1.8453	0.023728	-1.38684	-2.90889
Q544B1;P47738;A0A0G2JEU1;A0A0G2JFQ0;A0A0G2JF60;D3YYF3	Aldehyde dehydrogenase, mitochondrial	Aldh2	-0.129443	-0.191334	-0.183026	-0.334881	-0.163114	0.129443	0.274031	1.98738	1.37963	1.68211	+	flight_post-flight	4.1764	0	-1.89271	-7.40152
Q3UCH0;P47911;E9PUX4;A0A0J9YU32	60S ribosomal protein L6	Rpl6;Gm5428	0.0408079	-0.125322	-0.0408079	-0.981853	-0.444399	0.886706	-1.66662	1.57704	0.821242	1.04598	+	flight_post-flight	2.07888	0.0158942	-1.42488	-3.25491
Q58EU6;P47962;D3YYV8	60S ribosomal protein L5	Rpl5	-0.587229	0.136074	-1.35437	-0.0268684	-0.158183	0.0268684	-1.43817	1.47818	1.2306	1.00407	+	flight_post-flight	2.02586	0.0140108	-1.69571	-3.29695
P47963;A0A140T8K8	60S ribosomal protein L13	Rpl13	-0.984445	0.237749	-0.27602	-0.237749	-0.272436	0.626201	-0.696585	1.90495	1.08681	1.44225	+	flight_post-flight	2.39062	0.0117431	-1.79312	-3.9162
P48036;A0A0G2JGQ0	Annexin A5	Anxa5	0.665238	1.14632	0.760212	0.106553	-1.41724	-1.23506	0.922438	-1.4915	-0.106553	-0.182704	+	flight_post-flight	1.41199	0.0487196	1.26317	2.2811
P48771	Cytochrome c oxidase subunit 7A2, mitochondrial	Cox7a2	0.519546	-0.0244939	0.357378	-0.208596	0.132107	0.0244939	0.535138	-1.79375	-1.0494	-1.98369	+	flight_post-flight	2.63531	0.0115733	1.76991	4.3127
P49429;D3Z1U3;F6X9Z6	4-hydroxyphenylpyruvate dioxygenase	Hpd	0.0264719	-0.320648	-0.408925	0.255291	-0.0264719	-0.14888	-0.35658	1.78614	0.671808	2.20737	+	flight_post-flight	1.95445	0.0173465	-1.66706	-3.17818
Q3TF14;P50247;A2ALT5	Adenosylhomocysteinase	Ahcy	-0.183331	-0.452291	-0.545857	-0.0708973	0.448016	0.0708973	-0.60028	2.0261	0.256052	1.92928	+	flight_post-flight	1.73639	0.0249231	-1.7169	-2.86882
P50544;B1AR28	Very long-chain specific acyl-CoA dehydrogenase, mitochondrial	Acadvl	0.614691	1.01015	1.07262	0.618727	-0.758028	-0.818163	0.850287	-1.24076	-0.614691	-1.47787	+	flight_post-flight	3.16504	0.00544	1.94015	5.38718
P50580;D3YVH7	Proliferation-associated protein 2G4	Pa2g4	-2.21675	-0.834719	-1.58484	-0.16362	-0.0791584	0.583402	0.126068	0.667475	0.0791584	0.191023	+	flight_post-flight	1.39688	0.0450138	-1.51253	-2.33012
P51863	V-type proton ATPase subunit d 1	Atp6v0d1	0.586183	-0.420531	0.361542	-0.101399	0.144689	0.101399	0.423896	-2.26686	-0.556221	-1.63696	+	flight_post-flight	1.62404	0.0288742	1.59313	2.6707
Q545S0;P52196	Sulfurtransferase;Thiosulfate sulfurtransferase	Tst	0.000192766	-0.000192766	-0.0732532	-0.559641	0.274883	-0.957855	-0.603657	1.96299	1.35005	1.28376	+	flight_post-flight	3.03974	0.00752381	-1.69049	-4.95369
P52430;H3BK03;H3BLB8	Serum paraoxonase/arylesterase 1	Pon1	0.000612293	-0.000612293	0.525238	-0.0616275	0.307371	0.799102	0.362586	-2.11791	-1.11528	-1.45823	+	flight_post-flight	2.63336	0.0112195	1.67971	4.25379
P52825;A2A8E8;A2A8E7;A2A8E9	Carnitine O-palmitoyltransferase 2, mitochondrial	Cpt2	0.90882	0.53358	0.903494	0.427712	-0.372296	-0.664893	0.372296	-1.79286	-0.584989	-1.61687	+	flight_post-flight	2.67416	0.0109841	2.02497	4.51968
P53395;A0A0G2JGU0	Lipoamide acyltransferase component of branched-chain alpha-keto acid dehydrogenase complex, mitochondrial	Dbt	-0.938193	-0.323217	-0.810956	-0.687044	-0.0875027	0.399156	0.0875027	2.21821	0.747193	1.11007	+	flight_post-flight	2.42187	0.011087	-2.04834	-4.08024
Q8JZZ5;P53811	Phosphatidylinositol transfer protein beta isoform	Pitpnb	0.10606	-0.10606	-0.187141	0.262443	0.6977	0.657783	0.993839	-0.880949	-2.1383	-1.27201	+	flight_post-flight	2.13158	0.0131886	1.44925	3.34346
P54071;D6RIL6;A0A0U1RP68;A0A0U1RPR1	Isocitrate dehydrogenase [NADP], mitochondrial	Idh2	0.210827	-0.235721	-0.765634	-0.849558	0.285305	-0.23097	-0.210827	2.05498	0.458084	1.72629	+	flight_post-flight	1.82387	0.0200357	-1.82314	-3.02987
P54869	Hydroxymethylglutaryl-CoA synthase, mitochondrial	Hmgcs2	0.235903	-0.438215	-0.262352	-1.05148	-1.41969	0.0850112	-0.0850112	1.99287	1.11298	0.581064	+	flight_post-flight	1.73809	0.0255396	-1.60801	-2.83919
P55264	Adenosine kinase	Adk	0.0933702	-0.779006	-0.264658	-0.582085	0.32939	-1.1008	-0.0933702	2.11606	0.28176	1.44551	+	flight_post-flight	1.67521	0.0264965	-1.6642	-2.76434
P58252;G3UXK8	Elongation factor 2	Eef2	-0.0477956	-0.123731	-0.83996	-0.21892	-0.0665536	0.0477956	0.574866	2.09456	0.705513	1.73402	+	flight_post-flight	2.17406	0.0125986	-1.81897	-3.57578
P58710	L-gulonolactone oxidase	Gulo	0.571733	0.189802	0.386591	-0.189802	0.323978	0.191548	-0.488575	-1.61527	-1.3006	-1.9418	+	flight_post-flight	3.18044	0.00485714	1.85881	5.35154
Q3UIG0;P60229	Eukaryotic translation initiation factor 3 subunit E	Eif3e	-0.131916	-1.03431	0.0322363	-0.966788	0.239627	-0.305706	-0.0322363	0.63671	2.19567	1.26443	+	flight_post-flight	1.88761	0.0177885	-1.8908	-3.14688
Q5BLK2;P60867	40S ribosomal protein S20	Rps20	-0.00686059	-0.495576	-1.27446	-1.31832	0.00686059	-0.539779	0.389024	2.13645	0.570098	0.244906	+	flight_post-flight	1.44616	0.0384286	-1.75762	-2.45283
Q4FZH2;P61255;B1ARA3;B1ARA5	60S ribosomal protein L26	Rpl26	-0.282999	0.471087	-0.249672	-0.304559	-0.0172161	0.0172161	-0.924807	1.70101	1.57533	1.52051	+	flight_post-flight	3.16427	0.00388571	-1.69048	-5.17359
Q5BLJ9;P61358;A2A4Q0	60S ribosomal protein L27	Rpl27	-0.806867	-0.0966725	0.0966725	-0.218109	-0.554896	0.856949	-1.35991	1.73268	1.182	0.99587	+	flight_post-flight	2.48848	0.011514	-1.55976	-3.94418
Q14BR4;P61750;E9Q798;F6UFB9	ADP-ribosylation factor 4	Arf4	0.152632	0.10027	0.491429	-0.10027	0.594268	0.198809	-0.533944	-0.504963	-1.43957	-2.38956	+	flight_post-flight	1.69681	0.0267206	1.60571	2.77884
P61804	Dolichyl-diphosphooligosaccharide--protein glycosyltransferase subunit DAD1	Dad1	-0.45312	0.392774	1.15483	0.16628	0.133645	0.399271	-0.133645	-1.94013	-0.963172	-1.54667	+	flight_post-flight	1.95033	0.0174433	1.79851	3.21672
P61922;Q3TUE8;F7C9G3;F6RN86	4-aminobutyrate aminotransferase, mitochondrial	Abat	-0.0385006	-0.176357	0.0195806	0.158427	-0.251063	-0.0195806	-0.0729924	1.9545	1.14638	1.93363	+	flight_post-flight	3.07025	0.00494737	-1.68738	-5.00452
Q497E9;P62242	40S ribosomal protein S8	Rps8	-0.622924	0.186149	-0.3128	-0.586926	-0.186149	0.536492	-0.901946	2.28039	1.15936	0.674335	+	flight_post-flight	1.87509	0.0192477	-1.70549	-3.07218
Q5M9M4;P62245;F8WJ41;D3YVB4;D3Z712	40S ribosomal protein S15a	Rps15a	-0.0582897	-0.262984	0.231395	-0.73835	0.0582897	-0.725839	-0.561168	1.96345	1.10671	1.55037	+	flight_post-flight	2.56412	0.0118605	-1.74723	-4.17969
Q3UC02;P62281	40S ribosomal protein S11	Rps11	-1.09238	0.343772	0.118943	-0.118943	-0.275788	-0.223583	-0.973759	1.84762	1.20683	1.3099	+	flight_post-flight	1.99085	0.017057	-1.64194	-3.22344
Q545X8;P62702;V9GWY0	40S ribosomal protein S4;40S ribosomal protein S4, X isoform	Rps4x;Gm15013	-0.573091	-0.412896	-0.397406	-0.451982	0.397406	1.04011	-0.579638	1.97084	1.44098	0.776183	+	flight_post-flight	2.83882	0.00883019	-1.85485	-4.72024
P62717;F6YJW4	60S ribosomal protein L18a	Rpl18a	-1.05085	-0.384735	0.232185	-1.20471	-0.232185	0.390791	-1.40356	1.19656	0.995177	1.28208	+	flight_post-flight	2.16681	0.0123467	-1.75997	-3.54092
Q5BLK1;P62754	40S ribosomal protein S6	Rps6	-0.0869208	0.0869208	-0.630613	-0.358691	-0.362663	0.253999	-1.90683	1.43034	1.36263	0.850807	+	flight_post-flight	2.75557	0.0119481	-1.46192	-4.28798
P62827;Q14AA6;A6H622;Q61820	GTP-binding nuclear protein Ran;GTP-binding nuclear protein Ran, testis-specific isoform	Ran;1700009N14Rik;Rasl2-9	-0.00776421	-1.04941	-1.20647	0.018066	0.00776421	-1.02628	-0.916465	1.43776	0.786538	1.3652	+	flight_post-flight	2.04256	0.0128324	-1.75789	-3.34567
P62830;A2A6F8	60S ribosomal protein L23	Rpl23	0.502993	-0.131897	-0.758233	-0.30308	0.131897	-0.730841	-0.892288	1.99659	1.19129	1.14436	+	flight_post-flight	2.06618	0.014257	-1.61664	-3.32644
Q58EA6;P62852	40S ribosomal protein S25	Rps25	-1.68576	-0.30529	-0.865131	0.30529	-0.913583	-0.689155	0.92416	1.0339	1.04612	0.946787	+	flight_post-flight	1.66013	0.0276389	-1.64666	-2.73757
Q3U9V4;P62880;D3Z1M1;D3YZX3;E9QKR0;D3Z1T4;P29387;E9PWM7;A0A0A6YVN9;V9GWY1	Guanine nucleotide-binding protein G(I)/G(S)/G(T) subunit beta-2;Guanine nucleotide-binding protein subunit beta-4	Gnb2;Gnb4	0.751784	0.105595	0.929735	0.508171	0.82198	-0.105595	-1.47419	-1.52848	-0.439476	-1.3826	+	flight_post-flight	2.29636	0.0125625	1.69067	3.71499
Q58DZ3;P62889	60S ribosomal protein L30	Rpl30	-0.772616	-0.0417403	-0.83591	-0.33368	0.0417403	0.866298	-0.774811	1.79629	1.37433	1.05983	+	flight_post-flight	2.94467	0.00734884	-1.90614	-4.94667
Q56A15;P62897;CON__P62894	Cytochrome c, somatic	Cycs	-0.00723944	-0.646721	-0.560215	-0.867119	-0.00636327	0.211761	0.00636327	0.360672	1.90394	1.92768	+	flight_post-flight	1.96742	0.014766	-1.91776	-3.27992
Q5YLW3;P62908;D3YV43;A0A140LI77	40S ribosomal protein S3	Rps3	-0.405897	-0.0740255	-0.725001	0.0740255	-0.410728	0.308693	-1.42599	1.65338	1.46931	1.05295	+	flight_post-flight	2.88719	0.00866667	-1.6746	-4.67676
P62911	60S ribosomal protein L32	Rpl32	0.0334288	-0.0334288	-1.23721	-0.88424	-0.0336937	0.762638	-0.77664	1.65146	1.10783	1.24285	+	flight_post-flight	2.27194	0.011872	-1.86441	-3.75248
P62918	60S ribosomal protein L8	Rpl8	-0.262318	-0.971168	-0.728533	-0.987807	0.262318	0.459834	-1.23078	1.74082	0.767584	1.03285	+	flight_post-flight	2.7635	0.00905263	-1.91787	-4.62367
P63017;Q504P4;D3Z5E2;D3YW43	Heat shock cognate 71 kDa protein	Hspa8	-0.34484	-1.06994	-1.48493	-0.78085	0.20194	0.708545	-0.20194	1.59014	0.622314	1.19254	+	flight_post-flight	2.59181	0.0120556	-2.05514	-4.38489
Q3UX28;P63030;D3YWY6;D3Z5S0;E9Q0V4;D3Z786	Mitochondrial pyruvate carrier 1	Mpc1	-0.812001	-0.278856	-0.378137	-0.876399	0.278856	1.72324	-0.615825	0.740822	1.0209	1.52781	+	flight_post-flight	2.86237	0.00835714	-1.68286	-4.64074
P63101;D3YXN6;D3YXF4;D3YW45	14-3-3 protein zeta/delta	Ywhaz	-1.41568	-0.584344	-0.507121	0.537361	0.317254	-0.558828	-0.317254	0.99979	0.466647	2.09226	+	flight_post-flight	1.37261	0.0451381	-1.67868	-2.33146
Q3UW83;Q5M9K7;P63325	40S ribosomal protein S10	Rps10	-1.01065	-0.101426	0.0578672	0.589872	-0.152131	-0.0578672	-0.489926	1.5361	1.13925	1.92172	+	flight_post-flight	1.8871	0.0191598	-1.64844	-3.07096
P67778;Q5SQG5	Prohibitin	Phb	0.413874	0.93141	1.16852	0.635128	-0.184122	-0.113391	0.113391	-1.30819	-0.371454	-2.06964	+	flight_post-flight	2.18397	0.0129778	2.03699	3.66921
P68040	Guanine nucleotide-binding protein subunit beta-2-like 1;Guanine nucleotide-binding protein subunit beta-2-like 1, N-terminally processed	Gnb2l1	-0.865594	0.227312	-0.62746	0.357753	-0.400884	-0.227312	-1.2678	1.68829	1.27953	1.17054	+	flight_post-flight	2.06308	0.0143204	-1.60645	-3.31744
Q5M9P1;P83882;A0A0A6YW33	60S ribosomal protein L36a	Rpl36a;Gm6525	-0.0985369	0.0985369	-0.696844	-0.501795	0.150678	-0.555224	-2.62811	0.609579	0.639302	0.474299	+	flight_post-flight	1.97816	0.0274483	-0.874053	-2.73541
P84084;D3YV25;E9Q2C2	ADP-ribosylation factor 5	Arf5	1.55974	1.57884	1.53698	0.133247	-0.556195	0.266454	-0.421235	-0.133247	-0.484259	-0.94042	+	flight_post-flight	1.85546	0.0199095	1.72151	3.04781
Q564F3;P97351	40S ribosomal protein S3a	Rps3a1;Rps3a	-1.15298	-0.291438	-0.649989	-0.40441	0.38865	0.291438	-0.386574	1.90373	1.31778	1.1196	+	flight_post-flight	3.01023	0.004	-2.07174	-5.17843
Q544Q7;P97370	Sodium/potassium-transporting ATPase subunit beta-3	Atp1b3	0.178588	-0.198288	0.136572	0.00514734	0.335033	-0.00514734	0.51515	-2.11408	-0.651916	-1.90739	+	flight_post-flight	1.99451	0.0170909	1.5883	3.20764
P97384;D3Z7U0	Annexin A11;Annexin	Anxa11	-0.069043	0.586709	0.069043	-0.199117	0.264178	0.550533	0.371694	-2.17097	-1.61474	-0.880388	+	flight_post-flight	2.16451	0.0122038	1.65226	3.49154
P97429;A0A0N4SW89;A0A0N4SV57;D3Z0S1;F7ANV6;S4R1F2	Annexin A4;Annexin	Anxa4	0.0696653	0.250988	0.341736	-0.130635	-0.0696653	0.111749	0.430381	-2.27521	-1.11906	-1.47202	+	flight_post-flight	2.61064	0.0115	1.75504	4.2622
P97449;A0A0U1RNS3	Aminopeptidase N	Anpep	-0.0974627	-0.337248	0.0974627	0.316377	0.435588	0.118041	1.22711	-2.24165	-0.654141	-1.26682	+	flight_post-flight	1.66247	0.0293856	1.38232	2.65641
P97450;E9QAD6	ATP synthase-coupling factor 6, mitochondrial	Atp5j	0.0818566	0.736164	0.75781	0.985831	-1.20946	-1.67262	1.28756	-0.874277	-0.0818566	-0.464624	+	flight_post-flight	1.86326	0.026237	1.114	2.7892
P97807;H3BKG7	Fumarate hydratase, mitochondrial	Fh	-0.391638	0.138331	-0.195856	-0.00779665	-0.180303	0.00779665	-0.357745	2.3734	0.422727	1.67832	+	flight_post-flight	1.63612	0.0288108	-1.60572	-2.69154
P99027	60S acidic ribosomal protein P2	Rplp2	-1.26154	0.253029	-0.726258	-1.08359	-0.131049	0.921097	-0.33785	0.131049	1.94339	0.932307	+	flight_post-flight	1.45856	0.0382328	-1.70684	-2.46059
P99028	Cytochrome b-c1 complex subunit 6, mitochondrial	Uqcrh	0.490474	0.393787	1.09122	0.782099	-0.625611	-0.621321	1.04732	-1.28264	-0.393787	-1.76844	+	flight_post-flight	2.30212	0.0117355	1.83769	3.79091
P99029;G3UZJ4;H3BJQ7	Peroxiredoxin-5, mitochondrial	Prdx5	-0.881388	-0.425422	-1.16597	-0.441248	0.27562	0.226329	0.669879	2.15537	-0.226329	1.10237	+	flight_post-flight	1.43528	0.038686	-1.73898	-2.43339
Q01853	Transitional endoplasmic reticulum ATPase	Vcp	-0.564334	-0.524698	-1.11598	-0.145241	-0.120586	0.374718	0.120586	2.03405	0.286011	1.65864	+	flight_post-flight	1.8991	0.0170927	-1.91379	-3.17119
Q03265;D3Z6F5;D6RJ16	ATP synthase subunit alpha, mitochondrial;ATP synthase subunit alpha	Atp5a1	-0.049804	1.2665	1.14354	1.27347	0.639934	0.049804	-1.40351	-0.280849	-0.846889	-1.13409	+	flight_post-flight	1.91344	0.0186479	1.66237	3.11505
Q04857	Collagen alpha-1(VI) chain	Col6a1	0.657171	-0.287162	0.287162	-0.670796	0.789086	0.862173	0.375189	-2.06771	-0.790359	-1.24353	+	flight_post-flight	1.47515	0.0403955	1.36379	2.39678
Q06185;Q8BTB6	ATP synthase subunit e, mitochondrial	Atp5i;Atp5k	0.527779	0.388383	0.267955	-0.0284789	0.0284789	-0.0828943	0.807996	-2.33122	-0.793256	-1.33177	+	flight_post-flight	2.15846	0.0121842	1.77433	3.53346
Q07076	Annexin A7	Anxa7	1.16422	0.751335	0.952395	0.0771809	-0.0771809	0.270765	-0.456327	-1.89547	-1.37023	-0.639708	+	flight_post-flight	2.36367	0.0112549	2.03809	3.97512
Q3UAI3;Q08857;A0A0G2JFB7	Platelet glycoprotein 4	Cd36	0.468459	0.922285	0.649548	0.331431	-1.19783	-0.331431	0.958777	-1.69994	-0.909539	-1.10328	+	flight_post-flight	3.12934	0.0043871	1.83052	5.2326
Q14AZ9;Q8BGC4	Zinc-binding alcohol dehydrogenase domain-containing protein 2	Zadh2	0.0411638	0.970931	-0.0411638	-0.245677	-0.410445	-0.515028	-0.374146	1.91872	1.04924	1.62403	+	flight_post-flight	1.76744	0.0263173	-1.34935	-2.78606
Q3TQC7;Q9WUZ9	Ectonucleoside triphosphate diphosphohydrolase 5	Entpd5	1.01594	0.722701	1.09831	0.61699	-0.754642	-1.06359	1.07714	-1.0044	-1.26814	-0.61699	+	flight_post-flight	3.49078	0.00769231	1.82666	5.91631
Q3TVJ8;Q9D8L3;Q62186	Translocon-associated protein subunit delta	Ssr4	-0.348718	0.34771	0.409021	0.673974	0.342767	0.285753	-0.285753	-1.4586	-0.501859	-2.34003	+	flight_post-flight	1.67627	0.0268467	1.704	2.77666
Q3TWI2;Q99LB7;A2AH52;A2AH53	Sarcosine dehydrogenase, mitochondrial	Sardh	-0.503948	-0.108952	0.0381634	0.177016	-0.264083	-0.224839	-0.0381634	2.05874	1.10632	1.76558	+	flight_post-flight	2.71822	0.0109859	-1.74298	-4.43702
Q3U3J1;P50136;A0A0U1RPK5	2-oxoisovalerate dehydrogenase subunit alpha, mitochondrial	Bckdha	-1.49232	-1.44485	-1.14796	-0.938718	-0.00287669	0.00287669	0.234566	1.42648	0.164975	0.607692	+	flight_post-flight	2.65375	0.0106087	-1.98901	-4.46476
Q3U4Z7;Q8VDJ3;A0A087WP83	Vigilin	Hdlbp	-0.948037	-0.120813	-0.249042	-1.13457	0.137269	-1.90356	0.832552	1.36013	0.732999	0.120813	+	flight_post-flight	1.6204	0.0318994	-1.35109	-2.58793
Q3U816;Q9Z2G9	Oxidoreductase HTATIP2	Htatip2	-0.0438744	0.581256	0.689959	0.323499	-0.878276	0.0438744	0.69427	-0.326576	-1.27046	-2.25909	+	flight_post-flight	1.67396	0.0264571	1.67309	2.76495
Q3UEE8;Q9WU19	Hydroxyacid oxidase 1	Hao1	0.182263	-0.0756871	0.468611	-0.716979	1.31081	0.464452	0.0756871	-0.696327	-1.52452	-1.86513	+	flight_post-flight	1.61084	0.0324348	1.32654	2.56601
Q3UEG6;H7BWY3;D3YZ49;D3YZ52	Alanine--glyoxylate aminotransferase 2, mitochondrial	Agxt2	0.747586	-0.556648	-1.39136	-0.677713	-0.00620673	-0.417758	0.00620673	1.726	0.391759	1.5585	+	flight_post-flight	1.35627	0.0464891	-1.69495	-2.31116
Q3UEJ8;Q9D826	Peroxisomal sarcosine oxidase	Pipox	-0.663788	0.334181	-0.541929	-1.91555	-0.334181	0.386862	-1.4577	0.914382	0.574552	0.96555	+	flight_post-flight	1.37782	0.0466237	-1.51493	-2.30422
Q3UEN8;Q64459;Q9JMA7;Q64481	Cytochrome P450 3A11	Cyp3a11	-1.07754	-0.607023	-0.184562	-0.389146	0.0791835	0.00163701	-0.00163701	2.18506	0.245903	1.56323	+	flight_post-flight	1.80038	0.0198095	-1.89597	-3.01306
Q3UEP4;D3YUP6;D3YWN0		Ugt2b36	-0.000258811	0.0416126	0.402499	0.332343	0.682306	-0.0672979	0.000258811	-1.7681	-0.559797	-2.19458	+	flight_post-flight	1.98026	0.0166875	1.70154	3.22966
Q3UEQ9;Q99K67;F6VMP2	Alpha-aminoadipic semialdehyde synthase, mitochondrial;Lysine ketoglutarate reductase;Saccharopine dehydrogenase	Aass	0.0433478	-0.0433478	-0.057971	-0.0705973	-0.300514	-0.0659825	0.177636	2.23658	0.87307	1.75988	+	flight_post-flight	2.36127	0.0111	-1.65532	-3.79978
Q3UER1;Q91Y97	Fructose-bisphosphate aldolase;Fructose-bisphosphate aldolase B	Aldob	-0.515881	-0.427892	-0.818031	0.146241	0.0837111	-0.0837111	-0.299866	2.11608	0.806944	1.6209	+	flight_post-flight	2.31678	0.0115826	-1.91853	-3.84865
Q3ULL5;Q99L45	Eukaryotic translation initiation factor 2 subunit 2	Eif2s2	-1.16782	0.0111775	-1.09636	-1.93346	-0.336188	-0.0111775	0.270966	1.12212	0.739514	0.838562	+	flight_post-flight	1.99846	0.0139887	-1.94668	-3.33781
Q3UVJ7;Q9WV68	Peroxisomal 2,4-dienoyl-CoA reductase	Decr2	0.480571	0.70733	0.607111	0.636552	0.128322	-0.128322	-0.471967	-1.90663	-1.12279	-1.53081	+	flight_post-flight	3.9231	0	2.12797	7.15315
Q3UW66;Q99J99	Sulfurtransferase;3-mercaptopyruvate sulfurtransferase	Mpst	0.132516	0.035646	-1.83121	-0.17505	-0.55567	-0.035646	-0.202305	1.65469	1.24153	0.983273	+	flight_post-flight	1.55789	0.0304968	-1.75269	-2.61488
Q3UW87;Q64464	Cytochrome P450 3A13	Cyp3a13	-0.837131	-1.61228	-0.270409	-1.14309	0.356231	1.34806	-0.579255	1.10282	0.866569	0.270409	+	flight_post-flight	2.14031	0.0120503	-1.71233	-3.4799
Q3UXD9;Q99MZ7;D6RHN4;D6RIP0	Peroxisomal trans-2-enoyl-CoA reductase	Pecr	1.35719	1.34205	1.41972	0.47975	-1.17904	0.16239	-0.860387	-0.319098	-0.908962	-0.16239	+	flight_post-flight	2.36661	0.0115447	1.61316	3.78547
Q3V117;Q91V92;Q3TS02	ATP-citrate synthase	Acly	0.367341	-0.804261	-1.25287	-0.87657	0.123754	-0.00686971	0.00686971	1.96741	-0.105075	1.4082	+	flight_post-flight	1.32194	0.0501207	-1.73177	-2.26842
Q499J3;Q8BWP5;A2AIT6;A8Y5N9;A8Y5P0	Alpha-tocopherol transfer protein	Ttpa	0.664145	0.793116	0.0769158	0.851329	-0.0769158	1.90648	-0.745269	-0.979493	-1.19862	-0.779177	+	flight_post-flight	2.97534	0.00823529	1.58214	4.74821
Q4FJK0;Q9CQ62	2,4-dienoyl-CoA reductase, mitochondrial	Decr1	0.596785	-0.77481	-0.180696	-0.14521	-0.958712	-1.92353	0.14521	0.892589	0.855521	1.34943	+	flight_post-flight	1.63765	0.0344773	-1.15849	-2.52989
Q4KL76;Q64433	10 kDa heat shock protein, mitochondrial	Hspe1	-0.0742909	-0.484413	-0.288564	0.0742909	-0.547944	-0.310212	0.554735	0.817072	1.50233	2.24549	+	flight_post-flight	2.22668	0.0127887	-1.71488	-3.61622
Q4LDG0;E9PXV4;F6YDR6	Bile acyl-CoA synthetase	Slc27a5	-0.174904	-0.242603	0.113027	-0.902746	-0.113027	1.33322	-1.77404	1.18691	0.774405	1.06625	+	flight_post-flight	2.3064	0.0124416	-1.31099	-3.50677
Q4VA32;Q9CQR4	Acyl-coenzyme A thioesterase 13;Acyl-coenzyme A thioesterase 13, N-terminally processed	Acot13	0.23321	-0.884459	-0.0574186	-0.108358	0.0574186	-0.901299	-0.13517	1.83167	0.476144	1.93201	+	flight_post-flight	1.68838	0.0266475	-1.61753	-2.77017
Q53ZW9;Q9QXZ6;E9Q0W2;A0A0G2JDD1;Q91YY5;E0CX25	Solute carrier organic anion transporter family member 1A1	Slco1a1	-0.0536529	0.0536529	0.199578	0.222232	0.339809	-0.627489	0.429274	-0.99697	-0.749845	-2.57979	+	flight_post-flight	1.61323	0.0292686	1.54765	2.64232
Q543E2;Q9WVD5	Mitochondrial ornithine transporter 1	Slc25a15	-0.278357	-0.379669	-0.277362	-0.84789	0.277362	0.899728	-1.38898	1.34893	1.36067	1.22301	+	flight_post-flight	3.89459	0	-1.75669	-6.6224
Q564E8;Q9D8E6	60S ribosomal protein L4	Rpl4	-0.0170259	-0.311241	-0.754565	-1.07156	0.0170259	0.733785	-1.15425	1.83675	1.11179	0.839345	+	flight_post-flight	2.32743	0.0112881	-1.80122	-3.8164
Q5FW57;M0QWP3	Glycine N-acyltransferase-like protein	Gm4952	-0.0363969	-0.175008	-0.376968	0.0363969	0.774825	-0.875221	-0.46679	1.47419	1.78979	1.3652	+	flight_post-flight	3.98605	0	-1.68105	-6.68687
Q5FW60	Major urinary protein 20	Mup20	0.409885	0.416136	0.490341	0.824425	-0.362003	-1.39364	0.137442	-2.01175	-0.137442	-1.25719	+	flight_post-flight	1.78723	0.0230121	1.67066	2.93043
Q5NCJ9;Q8R1I1	Cytochrome b-c1 complex subunit 9	Uqcr10	0.208222	0.343429	0.755983	0.334744	-0.328281	-0.208222	1.46424	-1.60072	-0.287976	-1.79298	+	flight_post-flight	1.9424	0.0179612	1.63782	3.14942
Q5SX53;Q9CR62;Q5SX46;Q5SX48	Mitochondrial 2-oxoglutarate/malate carrier protein	Slc25a11	0.368679	1.34545	0.750563	0.0687515	0.380608	-1.07961	-1.88321	-1.09657	-0.0687515	-0.649367	+	flight_post-flight	1.5315	0.0389827	1.23826	2.42798
Q5SXR6;Q68FD5;F6Z1R4	Clathrin heavy chain;Clathrin heavy chain 1	Cltc	-0.339332	-1.23728	-0.423373	-0.586469	-0.259086	1.01907	0.259086	1.06817	2.04388	0.582754	+	flight_post-flight	2.12966	0.0121046	-1.87822	-3.52633
Q60597;Z4YJV4;E9Q7L0;Q5SVY1;Q5SVY0	2-oxoglutarate dehydrogenase, mitochondrial	Ogdh	-0.743387	-0.544519	-1.54775	-0.492006	-0.0794104	0.0794104	0.243238	1.70499	0.838913	1.35305	+	flight_post-flight	2.71885	0.00850909	-2.1309	-4.65382
Q60991	25-hydroxycholesterol 7-alpha-hydroxylase	Cyp7b1	0.144346	0.315731	0.188739	0.250551	-0.144346	-0.327151	0.248557	-1.94959	-0.425643	-2.14695	+	flight_post-flight	1.89378	0.0185607	1.73223	3.109
Q61171;D3Z4A4	Peroxiredoxin-2	Prdx2	-0.569897	-0.728069	-1.3225	-0.0564537	0.0897634	-1.06621	0.0564537	0.487998	1.75899	1.38301	+	flight_post-flight	2.096	0.011975	-1.87923	-3.47259
Q61176	Arginase-1	Arg1	0.247542	-0.247542	-0.252265	-0.276906	-1.25571	0.332531	-0.411979	1.82568	0.351926	1.85015	+	flight_post-flight	1.69004	0.0274502	-1.47488	-2.72735
Q61425	Hydroxyacyl-coenzyme A dehydrogenase, mitochondrial	Hadh	-0.849161	-0.361036	-0.644575	-0.40019	0.612498	0.361036	-1.09497	1.73759	1.02604	1.34034	+	flight_post-flight	3.50963	0.00472727	-1.93173	-6.06042
Q62087;H3BL07	Serum paraoxonase/lactonase 3	Pon3	0.0441346	0.12558	0.161042	-0.182131	0.0178328	-0.0178328	1.209	-2.0743	-0.960863	-1.49495	+	flight_post-flight	2.54784	0.0107071	1.54719	4.02877
Q62425;A0A0N4SVQ1	Cytochrome c oxidase subunit NDUFA4	Ndufa4	-0.775845	-0.42739	-0.151161	-0.790721	0.151161	0.893929	-1.14288	0.962295	1.56468	1.43699	+	flight_post-flight	3.26066	0.00647619	-1.8576	-5.50269
Q63880	Carboxylesterase 3A	Ces3a	-0.122407	0.122407	0.478605	0.445662	0.25663	-0.353546	0.272286	-2.08428	-0.724506	-1.84614	+	flight_post-flight	2.22564	0.0130647	1.78271	3.6438
Q63886	UDP-glucuronosyltransferase 1-1	Ugt1a1	-0.03009	-0.20865	0.03009	0.216262	0.265475	1.81293	0.592356	-2.03806	-0.596088	-0.831146	+	flight_post-flight	1.51314	0.0419832	1.157	2.37179
Q64435	UDP-glucuronosyltransferase 1-6	Ugt1a6	0.705754	0.187502	0.288021	0.0809161	-0.0809161	0.948566	-0.990206	-2.09547	-0.497287	-1.36092	+	flight_post-flight	1.94232	0.0178744	1.63344	3.14768
Q64458;Q3UT49;H3BLM0	Cytochrome P450 2C29	Cyp2c29	-0.311994	0.655808	0.859471	0.594062	1.24103	-0.852989	0.157088	-1.72786	-0.157088	-1.44166	+	flight_post-flight	1.55516	0.0324308	1.5582	2.56322
Q64521;A2AQR0	Glycerol-3-phosphate dehydrogenase, mitochondrial;Glycerol-3-phosphate dehydrogenase	Gpd2	0.477955	-0.0210218	0.446507	0.303003	-0.582997	0.0210218	0.90259	-1.97798	-0.489788	-1.78119	+	flight_post-flight	2.05345	0.012907	1.71793	3.34767
Q6A0D1;Q9CRD2	ER membrane protein complex subunit 2	Emc2	0.0513202	0.204436	0.174184	-0.0383274	-0.2151	0.0383274	0.087085	-0.998999	-0.609885	-2.73834	+	flight_post-flight	1.4229	0.0415618	1.54698	2.37453
Q6GQT9	Nodal modulator 1	Nomo1	0.407114	0.28522	0.188441	0.539574	-0.494398	-0.188441	0.831793	-1.83578	-0.626425	-1.92145	+	flight_post-flight	2.39722	0.0114074	1.8163	3.93807
Q6P3A8	2-oxoisovalerate dehydrogenase subunit beta, mitochondrial	Bckdhb	0.063604	-1.19972	-2.11268	-1.03556	-0.548886	-0.063604	0.144853	1.13442	0.259317	0.583412	+	flight_post-flight	1.53988	0.0319498	-1.73014	-2.58353
Q6P5E4;G3UZU8;G3UY73;G3UYG7;G3UY35	UDP-glucose:glycoprotein glucosyltransferase 1	Uggt1	0.115347	-0.0665706	0.576342	-0.129574	0.110736	0.0665706	0.51373	-2.26523	-0.856574	-1.57724	+	flight_post-flight	2.13074	0.0119006	1.69024	3.45587
Q6PB66;F6V2A3	Leucine-rich PPR motif-containing protein, mitochondrial	Lrpprc	-0.60621	-0.301879	0.0356484	-1.05815	-0.0356484	-0.728877	1.13213	1.69717	0.309591	1.62171	+	flight_post-flight	1.82092	0.0208101	-1.69214	-2.98699
Q6ZWN5;F7CJS8;D3YWH9;Q9CXW7;D3Z673;D3YUV6	40S ribosomal protein S9	Rps9	0.0672478	0.0661284	-0.52304	-1.05404	-0.259268	-0.0661284	-1.6603	1.82099	0.901915	0.805536	+	flight_post-flight	1.84185	0.0215768	-1.53707	-2.96482
Q6ZWX6	Eukaryotic translation initiation factor 2 subunit 1	Eif2s1	-1.17012	0.113939	-0.784848	-0.113939	-0.654695	0.285808	-0.471953	1.53046	1.34731	1.44853	+	flight_post-flight	2.5518	0.011358	-1.93084	-4.2555
Q71KT5;E0CX74;E9Q4M8;E0CX92;E0CYD6;E0CZ93;Q3V3I6	Delta(14)-sterol reductase	Tm7sf2	-0.139846	1.29907	1.57096	1.30059	1.00222	0.0244577	-0.0244577	-0.322351	-1.37346	-0.370793	+	flight_post-flight	1.58858	0.0292899	1.69656	2.64661
Q71RI9;A0A0G2JGE1;D6RJ70	Kynurenine--oxoglutarate transaminase 3	Ccbl2	-0.530124	-0.682886	0.00580455	-0.00580455	0.0175029	-0.452319	-0.292517	1.94454	0.59476	1.9563	+	flight_post-flight	2.05601	0.0122156	-1.80179	-3.38233
Q76MZ3;G3UWL2;H3BIV7;Q3TTF6;H3BKU1;G3UWS4;Q7TNP2;G3UXQ1;H3BJ83;H3BLQ0;H3BLE7	Serine/threonine-protein phosphatase 2A 65 kDa regulatory subunit A alpha isoform	Ppp2r1a	0.158902	-0.687428	-1.28318	-2.06247	-0.257082	-0.158902	0.253144	1.1125	0.346675	1.04336	+	flight_post-flight	1.54371	0.0312911	-1.80272	-2.60482
Q78IK4;B1AV14	MICOS complex subunit Mic27	Apool	-0.108364	0.360526	0.784043	0.352761	0.85586	0.108364	-0.697169	-1.82913	-0.554553	-1.79878	+	flight_post-flight	2.08136	0.0122892	1.74139	3.39977
Q80UM7	Mannosyl-oligosaccharide glucosidase	Mogs	0.328081	0.139756	-0.128848	-0.611068	0.398591	0.594669	0.128848	-1.46354	-0.537897	-2.34999	+	flight_post-flight	1.40296	0.0466092	1.38245	2.30503
Q8BGH2	Sorting and assembly machinery component 50 homolog	Samm50	0.764939	0.713543	-0.130172	-0.270408	0.130172	0.286812	0.426334	-1.39478	-0.681066	-2.26394	+	flight_post-flight	1.72774	0.0250494	1.71607	2.8558
Q8BGL3;E9QAK1	Sulfotransferase	2810007J24Rik	0.957559	-0.00316315	0.490441	0.551066	0.671824	-0.724324	0.00316315	-1.59167	-0.775298	-1.85158	+	flight_post-flight	2.50581	0.0117241	1.90516	4.16347
Q8BGY7	Protein FAM210A	Fam210a	-0.139387	0.691525	0.139387	0.623521	-0.143221	0.362526	1.51431	-1.37167	-0.463982	-1.88476	+	flight_post-flight	1.87164	0.0201586	1.5689	3.01972
Q8BH00;F6T4U0	Aldehyde dehydrogenase family 8 member A1	Aldh8a1	-0.188446	-0.0247525	-0.923637	-0.353837	0.595446	-0.0215231	0.336142	2.22893	0.0215231	1.59654	+	flight_post-flight	1.40873	0.0413634	-1.655	-2.37834
Q8BH95;F6T930	Enoyl-CoA hydratase, mitochondrial	Echs1	-0.911675	-0.151443	-0.727286	-0.29069	0.151443	-0.228848	0.244989	2.17799	0.849789	1.38974	+	flight_post-flight	2.44649	0.0113333	-1.99278	-4.10035
Q8BIJ6;E9PWN2;E9PWN3	Isoleucine--tRNA ligase, mitochondrial	Iars2	0.124043	1.32736	0.824099	-0.766496	0.424693	-0.124043	1.27883	-0.86839	-1.44718	-1.12982	+	flight_post-flight	1.39343	0.0450549	1.52571	2.32841
Q8BJL9		Ugt2b35	0.409784	1.08438	1.21586	0.316014	-0.316014	0.575941	-0.593424	-1.56558	-0.481683	-1.61594	+	flight_post-flight	2.3118	0.0116842	1.97757	3.86341
Q8BMF4	Dihydrolipoyllysine-residue acetyltransferase component of pyruvate dehydrogenase complex, mitochondrial	Dlat	-0.659635	-0.191457	-0.822616	-1.3637	-0.159158	0.384706	1.57096	1.81441	0.182238	0.159158	+	flight_post-flight	1.3868	0.0465514	-1.47795	-2.30786
Q8BMS1	Trifunctional enzyme subunit alpha, mitochondrial;Long-chain enoyl-CoA hydratase;Long chain 3-hydroxyacyl-CoA dehydrogenase	Hadha	0.681527	0.625427	0.415572	0.250592	0.539441	-0.250592	-0.834918	-1.82708	-0.70114	-1.74016	+	flight_post-flight	2.70244	0.0114375	1.91607	4.5133
Q8BP67;F6RSK3	60S ribosomal protein L24	Rpl24	-0.564667	0.038746	-0.748634	-0.939521	0.165552	-0.038746	-0.937432	2.04619	1.11081	0.952896	+	flight_post-flight	2.41062	0.010495	-1.92348	-4.00899
Q8BT60;V9GX86;B7ZCP8;V9GWY2;B7ZCP7;B7ZCP6;B7ZCP5;E9Q806;A3KGK7;B7ZCP4;A0A0R4J1D0;A0A0R4J0J1;Q3UYN2;Q8C166;P59108;Q1RLL3;Q9Z140;Q9DC53;Q8JZW4	Copine-3	Cpne3	0.688529	-0.810904	0.494193	-0.219283	0.219283	0.920214	0.35191	-1.82947	-1.11085	-1.40584	+	flight_post-flight	1.69633	0.0272753	1.48685	2.74023
Q8BWM0	Prostaglandin E synthase 2;Prostaglandin E synthase 2 truncated form	Ptges2	-0.655216	0.383116	-0.00881239	0.0721999	0.210631	0.00881239	0.209897	-2.43352	-1.01536	-1.17352	+	flight_post-flight	1.65276	0.0290667	1.48862	2.67978
Q8BWQ1	UDP-glucuronosyltransferase 2A3	Ugt2a3	-0.306242	0.487577	0.475323	0.426621	0.463873	0.306242	-0.569064	-2.08657	-1.01692	-1.49661	+	flight_post-flight	2.47072	0.0109278	1.80419	4.0544
Q8C165;F7B8J4	Probable carboxypeptidase PM20D1	Pm20d1	0.167964	-0.0298406	0.122405	0.633947	-0.306157	0.0298406	0.996328	-2.30321	-0.554788	-1.36168	+	flight_post-flight	1.79921	0.0231057	1.63018	2.93525
Q8C196;E9QAI5;G3UWN2;B2RQC6;E9QAT6	Carbamoyl-phosphate synthase [ammonia], mitochondrial	Cps1	-0.345127	-0.297116	-0.749527	-0.459208	0.10139	0.13373	-0.10139	2.29736	0.819453	1.42554	+	flight_post-flight	2.46874	0.0115909	-1.97686	-4.13213
Z4YJW0;Q8C7X2	ER membrane protein complex subunit 1	Emc1	-0.0383533	0.424769	0.259544	0.0482966	0.0383533	-0.20109	0.212632	-2.074	-1.10213	-1.77345	+	flight_post-flight	2.96404	0.00827273	1.82342	4.92411
Q8CAQ8;E9Q800;E9QAY6;A0A0U1RQ14	MICOS complex subunit Mic60	Immt	-0.155761	0.386587	0.747229	0.775154	-0.0538861	0.0538861	0.97711	-2.05519	-0.483841	-1.49954	+	flight_post-flight	1.92407	0.0171765	1.78449	3.17182
Q8CG76	Aflatoxin B1 aldehyde reductase member 2	Akr7a2	-1.09283	-0.900205	-1.45637	-1.35292	0.171602	0.0670397	0.876049	1.49738	0.0137658	-0.0137658	+	flight_post-flight	1.91321	0.0178957	-1.69971	-3.12758
Q8CHQ9	Probable N-acetyltransferase CML2	Cml2	-0.00838977	0.772845	0.695225	-0.583723	0.663528	1.12832	0.00838977	-1.34183	-0.520711	-1.94769	+	flight_post-flight	1.47264	0.0390957	1.48906	2.42927
Q8CHR6;A0A0G2JF48	Dihydropyrimidine dehydrogenase [NADP(+)]	Dpyd	0.120953	-0.860864	-1.16918	-0.701992	0.327199	-0.37422	-0.120953	1.72127	0.740408	1.61611	+	flight_post-flight	2.32046	0.0118929	-2.01203	-3.89114
Q8CHT0	Delta-1-pyrroline-5-carboxylate dehydrogenase, mitochondrial	Aldh4a1	-0.914392	-0.52256	-0.404646	0.108449	0.15333	-0.108449	-0.176802	1.90438	0.988396	1.74505	+	flight_post-flight	2.65411	0.0111429	-1.97923	-4.46045
Q8JZN5;A0A0G2JF25;A0A0G2JDY4	Acyl-CoA dehydrogenase family member 9, mitochondrial	Acad9	0.177548	1.50106	1.35554	0.771932	-0.530633	-0.177548	0.647388	-1.13136	-0.339023	-1.46792	+	flight_post-flight	2.09247	0.0121266	1.93096	3.48416
Q8JZZ0	UDP-glucuronosyltransferase 3A2	Ugt3a2	0.196951	0.440382	0.260303	0.274414	0.302037	-0.197895	-0.196951	-1.50763	-0.345633	-2.46224	+	flight_post-flight	1.69549	0.0257844	1.73151	2.81227
Q8K154;E9PZ30;D3YUX6;A0A0J9YU36;Q80X89;Q6PDD0		Ugt2b34	-0.0193077	-0.113735	0.491136	0.351804	0.220281	0.227012	0.0193077	-2.27038	-0.638231	-1.72027	+	flight_post-flight	1.96172	0.0171777	1.72043	3.20815
Q8K4Z3	NAD(P)H-hydrate epimerase	Apoa1bp	-0.303344	-0.0571034	-1.45423	-0.100974	0.0571034	-1.19512	0.795232	1.88464	0.344467	1.02238	+	flight_post-flight	1.46958	0.0385423	-1.56274	-2.4438
Q8QZR3;F6Z9B9;Q9D998;Q6AW46	Pyrethroid hydrolase Ces2a	Ces2a	0.454985	0.1983	0.644527	0.550235	-0.340404	-0.377328	0.864191	-2.05026	-0.1983	-1.66959	+	flight_post-flight	1.82609	0.0199825	1.76806	3.01762
Q8QZT1	Acetyl-CoA acetyltransferase, mitochondrial	Acat1	-0.0567442	-0.384813	-0.416028	-0.382722	0.232017	0.0567442	-0.062404	2.146	1.21664	1.5436	+	flight_post-flight	3.26048	0.00715789	-1.94549	-5.57698
Q8R084		Ugt2b1	0.381651	0.380443	0.748283	0.722529	-0.0732353	-0.451126	0.0732353	-2.03402	-0.642721	-1.69205	+	flight_post-flight	2.54392	0.0117949	2.01449	4.2808
Q8R086	Sulfite oxidase, mitochondrial	Suox	1.04271	0.259142	0.588919	0.963595	-1.46355	-1.14482	1.32052	-1.03752	-0.479905	-0.259142	+	flight_post-flight	2.20261	0.0123059	1.30578	3.35878
Q8R0J2;Q9R0Q9;E9PVP3;Q5F2B1;F6XX36;F6ZGG4	Mannose-P-dolichol utilization defect 1 protein	Mpdu1	1.0911	0.838422	0.316911	-0.887312	0.112822	1.30788	-0.112822	-1.49472	-0.696373	-1.32804	+	flight_post-flight	1.37311	0.0472708	1.51282	2.2972
Q8R164	Valacyclovir hydrolase	Bphl	0.0442628	-1.11926	-0.345281	0.0599983	-0.0442628	-0.238287	-0.388585	1.8622	1.40932	1.39955	+	flight_post-flight	2.53421	0.0121429	-1.8971	-4.20848
Q8R1G2;E0CXT6;E0CXH4	Carboxymethylenebutenolidase homolog	Cmbl	-1.10579	0.15051	-0.0441282	-0.751943	-0.0881505	-0.709241	0.761155	1.93446	0.0441282	1.53394	+	flight_post-flight	1.37156	0.0460817	-1.60868	-2.31598
Q8R5L1;O35658	Complement component 1 Q subcomponent-binding protein, mitochondrial	C1qbp	1.22195	0.162222	1.39201	0.617311	-0.876996	1.42179	-0.162222	-1.35385	-0.222843	-0.679893	+	flight_post-flight	1.85246	0.0207759	1.60057	3.00319
Q8VC30	Bifunctional ATP-dependent dihydroxyacetone kinase/FAD-AMP lyase (cyclizing);ATP-dependent dihydroxyacetone kinase;FAD-AMP lyase (cyclizing)	Dak	0.570214	-1.11414	-0.96901	-1.43815	-0.188223	0.180427	-0.180427	1.5639	0.371894	1.31972	+	flight_post-flight	1.51566	0.0325358	-1.82294	-2.56752
Q8VCN5	Cystathionine gamma-lyase	Cth	-0.147298	-0.03424	-0.221502	0.323348	-0.00119019	-0.24696	0.00119019	2.10843	0.650126	1.97341	+	flight_post-flight	1.92177	0.0184744	-1.59725	-3.1037
Q8VCT4;E9PYP1	Carboxylesterase 1D	Ces1d	-0.0542069	0.32708	1.24851	1.07937	-0.605711	0.0542069	1.69932	-1.36654	-0.986593	-0.260674	+	flight_post-flight	1.68912	0.0271888	1.52146	2.74157
Q8VCW8	Acyl-CoA synthetase family member 2, mitochondrial	Acsf2	1.1104	1.23971	1.15584	0.0753907	-0.609528	-0.348547	-0.0643658	-1.48318	0.0643658	-1.47898	+	flight_post-flight	1.73822	0.0238233	1.86126	2.90928
Q8VCZ9;F7CED2;D3Z5H4;D3YV12;D6RET3	Probable proline dehydrogenase 2	Prodh2	-1.4737	-1.59029	-1.62118	0.0231107	-0.0231107	0.301588	-0.86083	0.35393	0.213232	0.816814	+	flight_post-flight	1.66345	0.0275433	-1.62684	-2.73683
Q8VDD5;F2Z494;Q8BXF2	Myosin-9	Myh9	0.636549	-0.169594	0.169594	-0.214038	1.77781	1.10839	1.17117	-0.54666	-0.777837	-1.3516	+	flight_post-flight	1.64432	0.0383145	0.997658	2.45174
Q8VDK1;D3Z3I3;D3YY53;D3Z2Y2	Nitrilase homolog 1	Nit1	-0.290517	-0.526315	-0.266355	0.137064	-0.86759	0.0591125	-0.0591125	1.6791	1.45731	1.68702	+	flight_post-flight	3.88127	0	-1.84434	-6.71598
Q8VDN2;D3YYN7;Q3UHK5;Q6PIE5;A0A0G2JGX4;Q8VCE0;Q6PIC6;Q9WV27;Q91WH7;E9QNX7;Q64436;Q9Z1W8	Sodium/potassium-transporting ATPase subunit alpha-1	Atp1a1	1.04343	-0.029426	-0.00411103	0.00411103	0.969593	0.461519	1.16316	-1.77043	-1.03371	-1.09606	+	flight_post-flight	2.07592	0.0141639	1.55357	3.3133
Q8VEM8;G5E902	Phosphate carrier protein, mitochondrial	Slc25a3	0.746886	0.394259	1.00889	0.165943	0.590827	-0.367967	-2.19152	-0.825836	-0.165943	-1.11559	+	flight_post-flight	1.97472	0.0197309	1.28145	3.03301
Q91VA0;D3Z106;D3YV36	Acyl-coenzyme A synthetase ACSM1, mitochondrial	Acsm1	0.0660736	-0.422669	-0.783334	-1.09138	0.432747	-0.0660736	-0.252598	1.34959	1.68081	1.45269	+	flight_post-flight	2.95502	0.00508108	-2.05219	-5.0596
Q91VD9;A0A087WQR0;A0A087WQ77;A0A087WP77;A0A087WR47	NADH-ubiquinone oxidoreductase 75 kDa subunit, mitochondrial	Ndufs1	0.156066	0.196199	0.661775	0.781053	-0.449804	-0.156066	1.53631	-1.58333	-0.678492	-1.52805	+	flight_post-flight	2.57869	0.012	1.71207	4.18336
Q91VT4;D3Z6C4	Carbonyl reductase family member 4	Cbr4	-0.136719	-0.489888	-0.0973358	-1.66891	0.0236797	-0.0236797	0.590165	2.0635	0.953337	0.655961	+	flight_post-flight	1.63616	0.0268211	-1.82248	-2.74635
Q91WD5;D3YXT0;A0A0A6YW30;A0A0A6YXD3	NADH dehydrogenase [ubiquinone] iron-sulfur protein 2, mitochondrial	Ndufs2	1.2098	0.639895	0.430126	-0.11989	0.385561	0.11989	-0.523849	-1.82955	-0.705916	-1.6262	+	flight_post-flight	2.16521	0.0126111	1.9272	3.60121
Q91WG0;A0A140T8J0	Acylcarnitine hydrolase	Ces2c	0.321403	0.408294	0.633674	0.557793	-0.321403	-1.98985	0.544511	-1.04556	-0.369003	-1.55842	+	flight_post-flight	2.35045	0.0131729	1.47129	3.67757
Q91WL5	Cytochrome P450 4A12A	Cyp4a12a	0.154874	0.47917	0.599216	0.658398	0.331785	-0.67957	-0.154874	-1.73219	-0.629684	-1.99023	+	flight_post-flight	2.44183	0.0112766	1.92361	4.06227
Q91WN4;Q3V0K6	Kynurenine 3-monooxygenase	Kmo	-0.0434115	0.398756	0.0829619	0.0434115	0.265102	0.176338	-1.07088	-1.8289	-0.643534	-1.95529	+	flight_post-flight	2.12964	0.012439	1.59634	3.41314
Q91WT9;D3YUF2;D3YYN0;D3Z4K2	Cystathionine beta-synthase	Cbs	-0.247433	-0.092603	-1.50287	-0.663449	0.092603	0.237288	-0.126967	2.02124	0.0936443	1.43396	+	flight_post-flight	1.51383	0.0323313	-1.80954	-2.56214
Q91WU0;D3Z298	Carboxylic ester hydrolase	Ces1f	-0.0180951	0.401033	0.699967	0.0180951	-0.151094	0.0347062	1.41349	-1.82486	-0.471623	-1.66555	+	flight_post-flight	1.93854	0.017981	1.59593	3.12791
Q91XE0	Glycine N-acyltransferase	Glyat	-0.0271018	-0.108306	0.0271018	-0.908562	0.067765	-0.0309029	-1.36822	1.7018	1.56037	0.976151	+	flight_post-flight	2.4651	0.0110385	-1.66699	-3.97174
Q91XH5;G3UXX3;Q64105;G3UZ79	Sepiapterin reductase	Spr	0.192856	-1.05097	-1.55971	-0.637616	0.403308	0.178875	-0.37915	1.69248	-0.178875	1.33571	+	flight_post-flight	1.33556	0.0483307	-1.71363	-2.28483
Q91YI0;E0CY49;F7D439;E0CYV3	Argininosuccinate lyase	Asl	-0.203516	-0.33769	-0.551725	-0.269215	0.480955	0.203516	-0.295297	2.1292	0.480312	1.82854	+	flight_post-flight	2.07032	0.0123636	-1.81989	-3.4112
Q91YP0	L-2-hydroxyglutarate dehydrogenase, mitochondrial	L2hgdh	-0.0099521	0.334804	0.814552	-0.849334	0.259118	0.0099521	0.540615	-1.59011	-1.21051	-1.77473	+	flight_post-flight	1.83159	0.0211333	1.59763	2.97167
Q91YQ5;A0A0N4SUJ8	Dolichyl-diphosphooligosaccharide--protein glycosyltransferase subunit 1	Rpn1	0.433262	0.349599	0.135281	0.0238953	-0.0238953	0.917807	-0.190929	-1.93517	-0.892417	-1.80291	+	flight_post-flight	2.7363	0.0112615	1.77901	4.49118
Q921G7;Q6PF96	Electron transfer flavoprotein-ubiquinone oxidoreductase, mitochondrial	Etfdh	0.489793	0.227842	0.613066	0.106674	0.0814942	-0.321688	-0.0814942	-2.14853	-0.448914	-1.84024	+	flight_post-flight	1.99025	0.014129	1.83857	3.29163
Q921H8;H3BKL5;H3BJZ9;H3BKA1;H3BJC1	3-ketoacyl-CoA thiolase A, peroxisomal	Acaa1a	-0.0830833	0.0830833	0.538082	1.07003	0.149894	1.9032	-0.888146	-0.579912	-0.917174	-1.39311	+	flight_post-flight	1.8769	0.0224918	1.36543	2.94276
Q99J39	Malonyl-CoA decarboxylase, mitochondrial	Mlycd	0.252842	-1.26077	-1.63705	-0.762615	0.0286297	-0.0753409	-0.0286297	1.56761	0.607102	1.1188	+	flight_post-flight	1.82176	0.0194545	-1.94974	-3.05963
Z4YKT6;Q99J47	Dehydrogenase/reductase SDR family member 7B	Dhrs7b	1.21356	0.862961	1.28098	0.998949	-0.817595	-0.416469	0.416469	-1.52229	-0.761012	-0.481548	+	flight_post-flight	3.05976	0.00453333	2.01073	5.23487
Q99JR1	Sideroflexin-1	Sfxn1	-0.636979	-0.502377	-0.260665	-1.36009	0.731326	0.769705	-2.15806	0.260665	0.422972	0.626675	+	flight_post-flight	1.9157	0.0248276	-1.1268	-2.86314
Q99JY0;D3YXU1	Trifunctional enzyme subunit beta, mitochondrial;3-ketoacyl-CoA thiolase	Hadhb	1.40263	0.266938	0.387201	0.433228	0.494075	-0.266938	-0.731761	-1.98201	-0.33736	-1.31558	+	flight_post-flight	1.81969	0.0199467	1.83415	3.0265
Q99KI0	Aconitate hydratase, mitochondrial	Aco2	-0.101712	-0.0528759	-0.273743	-0.124741	0.699352	-0.356562	0.0528759	2.07792	0.950864	1.74799	+	flight_post-flight	2.75353	0.0110909	-1.73052	-4.48902
Q99KV1	DnaJ homolog subfamily B member 11	Dnajb11	0.0368598	0.0384553	1.06297	-0.541481	0.634221	-0.0368598	1.13152	-1.29132	-0.656029	-1.94737	+	flight_post-flight	1.45916	0.0401926	1.44744	2.39943
Q99L04	Dehydrogenase/reductase SDR family member 1	Dhrs1	0.375569	0.931499	1.46879	0.0655996	-0.0655996	0.605645	-0.109268	-1.42597	-0.486479	-1.78228	+	flight_post-flight	1.97437	0.014087	1.94194	3.29799
Q99L13	3-hydroxyisobutyrate dehydrogenase, mitochondrial	Hibadh	-0.874629	-0.118698	-1.01225	-0.586488	-0.430449	0.118698	0.652586	1.13169	1.30701	1.79947	+	flight_post-flight	3.08628	0.00468966	-2.06074	-5.32021
Q99LB2	Dehydrogenase/reductase SDR family member 4	Dhrs4	1.56413	1.12166	1.27935	0.0566248	0.750082	-0.0566248	-0.14831	-1.17952	-0.86312	-0.96506	+	flight_post-flight	2.4067	0.0108163	2.00801	4.03769
Q99LC3;A0A087WR38	NADH dehydrogenase [ubiquinone] 1 alpha subcomplex subunit 10, mitochondrial	Ndufa10	-0.387237	0.0239822	-0.124832	-0.711692	-0.0239822	1.39106	-1.43104	1.30459	1.05557	1.23601	+	flight_post-flight	3.16582	0.0079	-1.49867	-4.98114
Q99LC5	Electron transfer flavoprotein subunit alpha, mitochondrial	Etfa	0.955264	-0.330317	-0.863425	-0.742654	-0.078424	-0.540692	0.078424	2.01859	0.61688	1.38615	+	flight_post-flight	1.34404	0.0491053	-1.58582	-2.27247
Q99LP6	GrpE protein homolog 1, mitochondrial	Grpel1	-0.069686	-1.0351	-1.30167	-1.69748	0.759308	0.242022	-0.406312	1.43002	0.069686	0.705635	+	flight_post-flight	1.69214	0.0258806	-1.7611	-2.81498
Q99PG0	Arylacetamide deacetylase	Aadac	0.261951	0.992032	1.26317	-0.261951	0.916658	0.908966	-0.531407	-1.09105	-0.37636	-1.73267	+	flight_post-flight	1.57263	0.0313905	1.63049	2.60709
Q9CPX4;P29391;P49945	Ferritin;Ferritin light chain 1;Ferritin light chain 2	Ftl1;Ftl2	-0.145006	-0.902131	-0.235266	-0.760666	0.233227	0.145006	-0.698144	2.24114	0.688507	1.2131	+	flight_post-flight	2.1052	0.0122821	-1.89168	-3.49161
Q9CQ92;G3X9U9;D3YZ32	Mitochondrial fission 1 protein	Fis1	0.222239	0.114782	-0.265206	0.0627931	0.0873759	-0.0627931	1.10856	-1.4242	-1.98937	-1.27935	+	flight_post-flight	3.1143	0.00584615	1.59796	4.99789
Q9CQB4;Q9D855	Cytochrome b-c1 complex subunit 7	Uqcrb	0.0162458	0.175629	-0.0162458	0.487574	-0.423829	0.210996	1.91437	-1.99662	-0.387725	-0.839707	+	flight_post-flight	1.48642	0.0418659	1.24048	2.37027
Q9CQF9;F7CIP8;D3Z275	Prenylcysteine oxidase	Pcyox1	0.377725	0.172964	-0.0817293	0.302836	0.0817293	-0.612067	0.208141	-2.24992	-1.34426	-1.198	+	flight_post-flight	2.72326	0.0107647	1.79034	4.4758
Q9CQH3;D3Z568;F6Y6V5;D3YX99;D3Z6W9	NADH dehydrogenase [ubiquinone] 1 beta subcomplex subunit 5, mitochondrial	Ndufb5	0.344766	0.442492	0.178468	-0.143442	-0.492019	0.170131	0.143442	-1.29163	-0.529581	-2.52835	+	flight_post-flight	1.64079	0.027078	1.65542	2.71193
Q9CQX2	Cytochrome b5 type B	Cyb5b	0.0812873	0.391096	0.613607	0.531	-0.0812873	-0.109119	0.765916	-1.84165	-1.27762	-1.59775	+	flight_post-flight	3.80024	0	1.97659	6.71068
Q9CR57	60S ribosomal protein L14	Rpl14	-0.658969	0.267621	-0.267621	-0.593105	-0.832958	0.696209	-1.81201	1.31312	1.00686	0.933168	+	flight_post-flight	2.46075	0.0116393	-1.3974	-3.7908
Q9CR68	Cytochrome b-c1 complex subunit Rieske, mitochondrial;Cytochrome b-c1 complex subunit 11	Uqcrfs1	0.460826	0.431701	0.0621967	-0.101117	0.15424	-0.0621967	1.2187	-1.97157	-0.820469	-1.58558	+	flight_post-flight	2.42853	0.0116364	1.67261	3.91614
Q9CRB3;A0A0A0MQC3	5-hydroxyisourate hydrolase	Urah	-0.968965	-0.0298449	-0.801854	-1.67762	0.179112	0.0298449	-0.251451	1.48598	0.406128	1.46068	+	flight_post-flight	1.9794	0.0144	-1.98716	-3.31886
Q9CRB9;Q9D9P1;D3Z0L4;S4R238;F6QFL0	MICOS complex subunit Mic19	Chchd3	0.268763	0.681568	0.693343	0.953877	-0.268763	-0.591159	1.36219	-1.84991	-0.572061	-1.02272	+	flight_post-flight	2.40994	0.0116226	1.79762	3.9502
Q9CXJ4;F6ZFC5;D3Z1J6	ATP-binding cassette sub-family B member 8, mitochondrial	Abcb8	0.235046	-0.123512	-0.677076	0.638448	2.02005	0.539203	0.123512	-1.4124	-0.691843	-1.09696	+	flight_post-flight	1.47384	0.047369	1.0853	2.29175
Q9CXN7;D3Z2D7	Phenazine biosynthesis-like domain-containing protein 2	Pbld2;Pbld1	-1.15554	-0.916483	-1.46518	0.217646	0.323288	-0.0407123	-0.0217212	1.60483	0.0217212	1.39574	+	flight_post-flight	1.55038	0.030418	-1.83732	-2.62181
Q9CY50	Translocon-associated protein subunit alpha	Ssr1	0.239295	-0.00843918	0.124077	0.0572802	-0.630351	0.368766	0.00843918	-1.93669	-1.09344	-1.85586	+	flight_post-flight	3.15555	0.00412121	1.73172	5.19584
Q9CZ13;A0A0A6YW82;A0A0A6YWX6;A0A0A6YVZ0	Cytochrome b-c1 complex subunit 1, mitochondrial	Uqcrc1	0.0434232	0.279523	0.503549	0.132383	-0.0434232	-0.130017	0.768108	-2.1055	-0.343936	-1.8678	+	flight_post-flight	1.77212	0.0239194	1.6788	2.91061
Q9CZN7	Serine hydroxymethyltransferase	Shmt2	0.0649194	-0.71798	-0.317907	-0.850291	-0.935393	0.00912577	-0.00912577	1.48768	1.42458	1.59325	+	flight_post-flight	3.27592	0.00755556	-1.95716	-5.61691
Q9CZS1;G3UYH1;G3UWP3;Q3UIA4;Q9JHW9;A0A140LIF9	Aldehyde dehydrogenase X, mitochondrial	Aldh1b1	0.0694999	-0.0694999	-0.713126	-0.101841	0.125708	-0.108891	-0.129529	2.09715	0.706934	1.87861	+	flight_post-flight	2.09041	0.0125153	-1.76464	-3.42267
Q9CZU6;Q80X68	Citrate synthase, mitochondrial	Cs	-1.27532	-0.744142	-0.70902	0.398383	0.280811	-0.754115	-0.280811	1.09083	1.33447	1.56884	+	flight_post-flight	2.16645	0.0125241	-1.91391	-3.59857
Q9D0F3;D3Z5B9	Protein ERGIC-53	Lman1	0.127672	-0.148808	-0.097589	0.097589	1.3904	1.10092	0.842819	-1.4581	-0.630186	-1.60117	+	flight_post-flight	2.23424	0.0132644	1.22454	3.34478
Q9D1R9;A0A0G2JEY6;A0A0G2JGY8;D3YWC0	60S ribosomal protein L34	Rpl34	-0.765157	-0.0643461	0.0643461	-0.128426	-0.272823	0.32539	-0.679308	1.48259	1.05786	2.10496	+	flight_post-flight	2.48872	0.0113978	-1.77186	-4.06771
Q9D379;E9PWK1;F6YTS6;D3Z4M3	Epoxide hydrolase 1	Ephx1	0.890042	0.792073	0.64726	0.323754	-0.409897	-0.323754	1.60489	-1.28993	-0.621674	-1.46894	+	flight_post-flight	2.99969	0.00770732	1.79013	4.96351
Q9D6M3;E9PY45;E9PV90;E9Q6M6;A0A0J9YTY6;V9GWS2;Q80X52;E9Q579;A0A0J9YUX4;Q9DB41;A0A0J9YUJ4;V9GWV4;A0A0J9YVJ3	Mitochondrial glutamate carrier 1	Slc25a22	0.127061	-0.127061	-0.413571	-0.828383	-0.768749	0.677874	-1.39351	1.43754	1.19012	1.27875	+	flight_post-flight	2.8761	0.00889655	-1.61262	-4.60857
Q9D6R2	Isocitrate dehydrogenase [NAD] subunit alpha, mitochondrial	Idh3a	-0.825487	-0.792944	-0.976315	-0.0882802	-0.127988	0.0882802	0.11902	1.98497	0.780136	1.46347	+	flight_post-flight	2.5855	0.0118904	-2.08028	-4.3848
Q9D6U8	Protein FAM162A	Fam162a	-0.081831	0.081831	0.404134	-0.656126	0.648115	0.226101	1.30178	-2.03533	-0.812267	-1.19357	+	flight_post-flight	1.62299	0.0323344	1.28406	2.56573
Q9D7J9	Enoyl-CoA hydratase domain-containing protein 3, mitochondrial	Echdc3	-1.65087	-0.23029	-1.39286	-0.422725	0.243836	-0.180703	0.180703	1.40199	0.327873	1.38022	+	flight_post-flight	1.91656	0.0173538	-1.96088	-3.21147
Q9D7N9	Adipocyte plasma membrane-associated protein	Apmap	-0.564746	0.0611326	0.147328	0.836381	-0.0611326	0.40254	1.28374	-1.66596	-0.805841	-1.64849	+	flight_post-flight	1.81151	0.0238889	1.49345	2.9051
Q9DB05;P28663	Alpha-soluble NSF attachment protein	Napa	0.886083	-0.155173	0.151981	-0.151981	1.01395	1.00819	0.428414	-1.98229	-0.736639	-1.20184	+	flight_post-flight	1.78279	0.0247328	1.48965	2.863
Q9DB77;A0A140LI98	Cytochrome b-c1 complex subunit 2, mitochondrial	Uqcrc2	0.529222	0.737643	0.878709	0.7116	-0.137715	-0.757541	0.137715	-1.45798	-0.319061	-2.01445	+	flight_post-flight	2.25062	0.0119677	1.97812	3.76065
Q9DBA8	Probable imidazolonepropionase	Amdhd1	-0.0653644	-0.693622	-0.94106	-0.367921	0.380885	-0.258163	0.0653644	2.23542	0.461776	1.43783	+	flight_post-flight	1.94653	0.0166737	-1.89533	-3.24041
Q9DBF1;G3UYR8;G3UY72;E9Q1H3;E9Q1G1	Alpha-aminoadipic semialdehyde dehydrogenase	Aldh7a1	-0.931257	-0.91575	-0.951681	0.45946	-0.521866	-0.239072	0.239072	1.63705	0.252506	1.74557	+	flight_post-flight	1.58117	0.0292852	-1.79652	-2.65883
Q9DBH5	Vesicular integral-membrane protein VIP36	Lman2	0.0993362	-0.0366549	0.0366549	0.219534	0.166268	-0.641441	0.912949	-1.96915	-0.73737	-1.8015	+	flight_post-flight	2.31483	0.0132727	1.58239	3.68835
Q9DBM2	Peroxisomal bifunctional enzyme;Enoyl-CoA hydratase/3,2-trans-enoyl-CoA isomerase;3-hydroxyacyl-CoA dehydrogenase	Ehhadh	-0.0415732	0.0415732	-0.0919709	0.257225	-1.82588	-0.290521	-1.69565	1.06691	0.583104	1.07244	+	flight_post-flight	2.49523	0.0140535	-0.866174	-3.28732
Q9DBT9	Dimethylglycine dehydrogenase, mitochondrial	Dmgdh	-0.902511	-0.0558295	-0.349008	0.0558295	-0.4623	-0.556472	0.309939	1.99664	0.947608	1.59796	+	flight_post-flight	2.41363	0.0109333	-1.82695	-3.97033
Q9DC50	Peroxisomal carnitine O-octanoyltransferase	Crot	-1.86029	-0.699666	-0.64711	-0.00880218	0.325744	0.00880218	-0.0850283	0.601137	1.59314	1.27204	+	flight_post-flight	1.89236	0.0172611	-1.95941	-3.17282
Q9DCH4	Eukaryotic translation initiation factor 3 subunit F	Eif3f	-0.694444	0.520762	-0.0683472	-0.753447	-0.843632	-1.40603	0.0683472	0.915274	1.06688	1.73347	+	flight_post-flight	1.81198	0.024	-1.48741	-2.90347
Q9DCL9;D3Z6P1	Multifunctional protein ADE2;Phosphoribosylaminoimidazole-succinocarboxamide synthase;Phosphoribosylaminoimidazole carboxylase	Paics	-0.439268	-0.14049	-1.46853	-0.579965	0.182771	0.14049	-0.580887	1.92206	0.312843	1.45314	+	flight_post-flight	1.81018	0.0202478	-1.88641	-3.02573
Q9DCM0	Persulfide dioxygenase ETHE1, mitochondrial	Ethe1	0.0841486	-0.65371	-1.05345	-0.374831	0.410178	-1.73298	-0.0841486	1.52206	0.264091	1.32301	+	flight_post-flight	1.78703	0.0245914	-1.53585	-2.88571
Q9DCM2;A0A0N4SVE5	Glutathione S-transferase kappa 1	Gstk1	-0.239405	-0.179373	0.0316833	-0.20069	-0.882334	0.261449	-0.0316833	1.96078	1.3675	1.51876	+	flight_post-flight	3.9	0	-1.76263	-6.6415
Q9DCN1	Peroxisomal NADH pyrophosphatase NUDT12	Nudt12	-2.28162	-1.28278	-0.609388	-1.0221	-0.115376	0.228942	0.173419	0.322483	0.115376	0.720805	+	flight_post-flight	1.88788	0.0187834	-1.68519	-3.08465
Q9DCS9;D3YUK4	NADH dehydrogenase [ubiquinone] 1 beta subcomplex subunit 10	Ndufb10	0.262486	0.486004	0.585825	-0.114853	-0.0931165	0.0931165	0.734541	-1.88012	-0.474579	-2.00538	+	flight_post-flight	1.94644	0.0173065	1.75823	3.19764
Q9DCT2	NADH dehydrogenase [ubiquinone] iron-sulfur protein 3, mitochondrial	Ndufs3	0.526283	0.192881	0.698321	-0.192881	-0.396469	0.952883	0.98564	-1.48909	-0.407824	-1.93406	+	flight_post-flight	1.78951	0.0239841	1.58314	2.90559
Q9DCU9;E9Q1R2	4-hydroxy-2-oxoglutarate aldolase, mitochondrial	Hoga1	-0.512531	-0.702538	-0.85682	0.383445	-0.668802	-0.383445	0.697577	1.06401	1.00749	2.03334	+	flight_post-flight	2.05319	0.0121429	-1.79039	-3.37387
Q9DCV4;A2AGJ2	Regulator of microtubule dynamics protein 1	Rmdn1	0.767812	-0.108428	1.02713	1.34455	-1.38892	-1.00219	0.250789	-1.3433	0.108428	-0.85048	+	flight_post-flight	1.43624	0.0419944	1.45288	2.36946
Q9DCW4;A0A0U1RNP5;A0A0N4SVE0;A0A0U1RNR3;A0A0N4SWE9;A0A0U1RNK9;A0A0U1RQB4	Electron transfer flavoprotein subunit beta	Etfb	-0.471627	-0.39231	-0.644096	0.00461797	-0.00461797	-0.631882	0.645247	1.70161	1.38796	1.6035	+	flight_post-flight	3.9241	0	-1.94021	-6.92993
Q9DCX8	Iodotyrosine dehalogenase 1	Iyd	-0.0288936	-0.000156942	-0.00999523	-0.860476	0.000156942	1.20656	-0.134954	1.23553	1.45733	1.77039	+	flight_post-flight	2.75467	0.0109254	-1.71263	-4.47882
Q9DD20	Methyltransferase-like protein 7B	Mettl7b	-0.00622954	-0.0418532	0.00622954	-1.11766	-0.294492	1.56629	-1.44582	1.13081	0.49159	1.26421	+	flight_post-flight	1.65411	0.0318864	-1.25208	-2.59341
Q9EP75;Q8VCA4;Q99N18;G3UW81;G3UW78;Q99N17;Q3V1F1;Q99N16	Leukotriene-B4 omega-hydroxylase 3	Cyp4f14;Cyp4f15	0.468857	-0.0418985	-0.575406	0.369546	0.979085	1.25436	0.0418985	-1.79508	-1.45971	-0.651098	+	flight_post-flight	1.71389	0.0272628	1.35724	2.71664
Q9EQ20	Methylmalonate-semialdehyde dehydrogenase [acylating], mitochondrial	Aldh6a1	-0.0312818	-0.482767	-0.679953	-0.509758	-0.140614	0.0312818	0.807446	1.69535	0.900817	1.91973	+	flight_post-flight	2.83105	0.0084	-1.93124	-4.75404
Q9EQF5;F6ZLZ4	Dihydropyrimidinase	Dpys	-0.0621287	-1.30424	-1.37209	-0.690898	0.366281	0.0621287	-0.604956	1.6952	0.366676	1.19289	+	flight_post-flight	1.98455	0.0142418	-1.94226	-3.31431
Q9ERS2	NADH dehydrogenase [ubiquinone] 1 alpha subcomplex subunit 13	Ndufa13	-0.954625	-1.42854	-0.710572	0.390553	-0.0543714	-0.281648	0.252263	1.16956	1.96819	0.0543714	+	flight_post-flight	1.35481	0.0460656	-1.73984	-2.3172
Q9JHI5	Isovaleryl-CoA dehydrogenase, mitochondrial	Ivd	-0.629218	0.0510271	-0.0510271	0.387105	-0.673197	-0.359673	-0.21909	1.80288	0.99005	1.89417	+	flight_post-flight	2.26396	0.0128794	-1.6229	-3.63101
Q9JKY7		Cyp2d22	-0.0196523	0.0672199	-0.351565	0.0196523	0.2027	0.434891	0.803221	-1.45068	-0.661315	-2.33536	+	flight_post-flight	1.69713	0.0271701	1.41137	2.71459
Q9JLJ2;Q3U367	4-trimethylaminobutyraldehyde dehydrogenase	Aldh9a1	-0.00294786	-0.835588	-1.07	0.00294786	0.1588	-1.42264	-0.479561	1.80773	0.310313	1.23028	+	flight_post-flight	1.63725	0.0291717	-1.59251	-2.68942
Q9QXD6;F6YS63;E9Q0T7	Fructose-1,6-bisphosphatase 1	Fbp1	-0.449634	-0.651088	-1.03827	-0.591658	0.273271	-0.273271	0.395393	1.82245	0.301121	1.7967	+	flight_post-flight	2.17681	0.0129714	-1.98942	-3.64159
Q9QXF8	Glycine N-methyltransferase	Gnmt	-0.127771	-0.0493843	-0.169138	0.0991637	0.0493843	-0.357844	-0.527203	1.87558	0.517831	2.17909	+	flight_post-flight	1.83702	0.0213109	-1.58595	-2.9755
Q9QXX4	Calcium-binding mitochondrial carrier protein Aralar2	Slc25a13	0.585884	1.04368	1.15352	0.506434	-0.0327758	0.0327758	-0.623011	-1.42287	-0.147743	-1.88247	+	flight_post-flight	2.05387	0.0118272	1.97341	3.435
Q9QYG0	Protein NDRG2	Ndrg2	-1.03187	-0.812831	-1.14236	-0.119297	0.462957	0.0412389	-0.00804696	0.00804696	1.5093	1.86043	+	flight_post-flight	1.75096	0.0226612	-1.90251	-2.93869
Q9R1P3	Proteasome subunit beta type-2	Psmb2	-0.316162	-1.99169	-1.20706	-1.43404	0.616955	0.300653	0.591181	0.773635	0.0190777	-0.0190777	+	flight_post-flight	1.62579	0.0291948	-1.49512	-2.64411
Q9WTP7;F6RP11	GTP:AMP phosphotransferase AK3, mitochondrial	Ak3	-0.48419	-0.307434	-0.651459	-0.369141	0.307434	-0.688614	0.332585	1.92694	1.03701	1.6256	+	flight_post-flight	3.40542	0.00714286	-1.98291	-5.89751
Q9WV98	Mitochondrial import inner membrane translocase subunit Tim9	Timm9	0.395063	0.301334	0.387668	0.326744	-0.301334	-1.71717	1.1597	-1.66349	-0.31725	-1.11529	+	flight_post-flight	2.07944	0.0167749	1.38471	3.23428
Q9WVA2;Q4FZG7	Mitochondrial import inner membrane translocase subunit Tim8 A	Timm8a1	0.171396	0.848772	1.3105	1.21509	-1.05697	-1.50568	0.854949	-0.931683	-0.209193	-0.171396	+	flight_post-flight	1.8024	0.0258797	1.32386	2.82216
Q9Z0M5	Lysosomal acid lipase/cholesteryl ester hydrolase	Lipa	0.406433	0.134056	0.134832	0.409174	0.362775	-0.175802	-0.134056	-2.39369	-1.16445	-1.16837	+	flight_post-flight	2.46184	0.0110417	1.84662	4.06047
Q9Z1N5;Q8VDW0;G3UXI6;D6RHT5	Spliceosome RNA helicase Ddx39b;ATP-dependent RNA helicase DDX39A	Ddx39b;Ddx39a	0.0784837	-0.81489	-0.0784837	-0.600164	-0.0857436	-2.06518	1.19917	1.17781	0.371671	0.853078	+	flight_post-flight	1.82426	0.0265907	-1.15462	-2.76441
Q9Z1P6	NADH dehydrogenase [ubiquinone] 1 alpha subcomplex subunit 7	Ndufa7	-1.04436	-2.02396	-1.37466	-0.171374	-0.16416	0.939169	0.570188	0.16416	0.59465	0.52838	+	flight_post-flight	1.70133	0.0266227	-1.58265	-2.77832
Q9Z211	Peroxisomal membrane protein 11A	Pex11a	0.465288	1.02579	0.507374	0.246511	-0.121522	-0.556708	0.121522	-1.33168	-0.280679	-2.28505	+	flight_post-flight	1.7913	0.0207319	1.86038	2.99003
Q9Z2I9	Succinyl-CoA ligase [ADP-forming] subunit beta, mitochondrial	Sucla2	0.27897	0.0732449	-0.225462	-0.85155	-0.398591	-1.49041	-0.0732449	2.05593	0.837817	0.90913	+	flight_post-flight	1.66314	0.0291639	-1.44882	-2.68099

## Sheet: common
Protein IDs	Protein names	Gene names
J3QQ16;A0A087WS16;E9PWQ3;D3YWD1		Col6a3
A0A0A0MQ68;Q60759;D3Z4I2	Glutaryl-CoA dehydrogenase, mitochondrial	Gcdh
A0A0R4J023;Q9JLZ3;F6RT60;F6R307;A0A0R4J1L8;E9Q6L3;E9QMT1	Methylglutaconyl-CoA hydratase, mitochondrial	Auh
E9QN08;A0A0R4J1L2;Q91VK2;Q80T06;P57776;F6ZFU0;A0A0R4J1E2;D3Z7N2;D3YUQ9;D3YZT9;D3YY68	Elongation factor 1-delta	Eef1d
Q5M9M5;A0A140T8M7;P62751;D3YTY6	60S ribosomal protein L23a	Rpl23a
A2AP31;Q3UIU2;A2AP32	NADH dehydrogenase [ubiquinone] 1 beta subcomplex subunit 6	Ndufb6
B9EHY2;Q80W54;I7HIP5	CAAX prenyl protease 1 homolog	Zmpste24
D3YWT0;D3Z569;D3YTS1;Q9R0P6	Signal peptidase complex catalytic subunit SEC11;Signal peptidase complex catalytic subunit SEC11A	Sec11a
E9Q3B9;D3YYS6;O35678;Q3UFN1	Monoglyceride lipase	Mgll
F6SVV1;Q4FZE6;P62082	40S ribosomal protein S7	Gm9493;Rps7
Q7JCZ1;P00405	Cytochrome c oxidase subunit 2	mt-Co2;Mtco2
P05202	Aspartate aminotransferase, mitochondrial	Got2
P08249;A0A0G2JF23;A0A0G2JGY4	Malate dehydrogenase, mitochondrial	Mdh2
P10649;A2AE89	Glutathione S-transferase Mu 1	Gstm1
Q543H3;P11725;Q8R1A8	Ornithine carbamoyltransferase, mitochondrial	Otc
P14824;F8WIT2	Annexin A6;Annexin	Anxa6
Q3TG75;P29758	Ornithine aminotransferase, mitochondrial	Oat
Q5SUC3;P35564	Calnexin	Canx
P45952;D6RFD7	Medium-chain specific acyl-CoA dehydrogenase, mitochondrial	Acadm
Q544B1;P47738;A0A0G2JEU1;A0A0G2JFQ0;A0A0G2JF60;D3YYF3	Aldehyde dehydrogenase, mitochondrial	Aldh2
P48771	Cytochrome c oxidase subunit 7A2, mitochondrial	Cox7a2
P52430;H3BK03;H3BLB8	Serum paraoxonase/arylesterase 1	Pon1
Q8JZZ5;P53811	Phosphatidylinositol transfer protein beta isoform	Pitpnb
P58710	L-gulonolactone oxidase	Gulo
Q4FZH2;P61255;B1ARA3;B1ARA5	60S ribosomal protein L26	Rpl26
P61804	Dolichyl-diphosphooligosaccharide--protein glycosyltransferase subunit DAD1	Dad1
P61922;Q3TUE8;F7C9G3;F6RN86	4-aminobutyrate aminotransferase, mitochondrial	Abat
Q5M9M4;P62245;F8WJ41;D3YVB4;D3Z712	40S ribosomal protein S15a	Rps15a
Q3UC02;P62281	40S ribosomal protein S11	Rps11
P62827;Q14AA6;A6H622;Q61820	GTP-binding nuclear protein Ran;GTP-binding nuclear protein Ran, testis-specific isoform	Ran;1700009N14Rik;Rasl2-9
Q3UW83;Q5M9K7;P63325	40S ribosomal protein S10	Rps10
P68040	Guanine nucleotide-binding protein subunit beta-2-like 1;Guanine nucleotide-binding protein subunit beta-2-like 1, N-terminally processed	Gnb2l1
P97384;D3Z7U0	Annexin A11;Annexin	Anxa11
P97429;A0A0N4SW89;A0A0N4SV57;D3Z0S1;F7ANV6;S4R1F2	Annexin A4;Annexin	Anxa4
Q04857	Collagen alpha-1(VI) chain	Col6a1
Q14AZ9;Q8BGC4	Zinc-binding alcohol dehydrogenase domain-containing protein 2	Zadh2
Q3TWI2;Q99LB7;A2AH52;A2AH53	Sarcosine dehydrogenase, mitochondrial	Sardh
Q3UW66;Q99J99	Sulfurtransferase;3-mercaptopyruvate sulfurtransferase	Mpst
Q6ZWX6	Eukaryotic translation initiation factor 2 subunit 1	Eif2s1
Q8BT60;V9GX86;B7ZCP8;V9GWY2;B7ZCP7;B7ZCP6;B7ZCP5;E9Q806;A3KGK7;B7ZCP4;A0A0R4J1D0;A0A0R4J0J1;Q3UYN2;Q8C166;P59108;Q1RLL3;Q9Z140;Q9DC53;Q8JZW4	Copine-3	Cpne3
Z4YJW0;Q8C7X2	ER membrane protein complex subunit 1	Emc1
Q8CHT0	Delta-1-pyrroline-5-carboxylate dehydrogenase, mitochondrial	Aldh4a1
Q8QZT1	Acetyl-CoA acetyltransferase, mitochondrial	Acat1
Q8R164	Valacyclovir hydrolase	Bphl
Q8VDD5;F2Z494;Q8BXF2	Myosin-9	Myh9
Q8VDK1;D3Z3I3;D3YY53;D3Z2Y2	Nitrilase homolog 1	Nit1
Q8VDN2;D3YYN7;Q3UHK5;Q6PIE5;A0A0G2JGX4;Q8VCE0;Q6PIC6;Q9WV27;Q91WH7;E9QNX7;Q64436;Q9Z1W8	Sodium/potassium-transporting ATPase subunit alpha-1	Atp1a1
Q91VA0;D3Z106;D3YV36	Acyl-coenzyme A synthetase ACSM1, mitochondrial	Acsm1
Q91YP0	L-2-hydroxyglutarate dehydrogenase, mitochondrial	L2hgdh
Q9CQX2	Cytochrome b5 type B	Cyb5b
Q9CZN7	Serine hydroxymethyltransferase	Shmt2
Q9D0F3;D3Z5B9	Protein ERGIC-53	Lman1
Q9DB05;P28663	Alpha-soluble NSF attachment protein	Napa
Q9JHI5	Isovaleryl-CoA dehydrogenase, mitochondrial	Ivd

## Sheet: pathways
	LFQ intensities provided by MaxQuant
Protein name	Uniprot ID	f01	f02	f03	f04	k01	k02	k03	P01	P02	P03
Uniquely significant in control - postflight comparison
Cytochrome P450 2D26	Q8CIM7	5134300000000	5194500000000	5023800000000	4821900000000	6540500000000	7148100000000	6393700000000	5.22E+08	4120700000000	4123900000000
Retinol dehydrogenase 7	O88451	9487300000000	10791000000000	12071000000000	11696000000000	13329000000000	12744000000000	13833000000000	8482400000000	9719500000000	9050600000000
Integrin beta-1	P09055	1202700000000	698820000000	972190000000	783160000000	1549900000000	1250600000000	1426800000000	352780000000	690870000000	566570000000
Glutamyl aminopeptidase	Q52JJ6	676130000000	374950000000	501830000000	343810000000	828950000000	758310000000	993560000000	266280000000	437310000000	286710000000
Decorin	Q3UKR1	274280000000		700740000000	2.6E+07	2067300000000	1306700000000	661450000000	232770000000	148150000000	241230000000
T-complex protein 1 subunit beta	Q542X7	184200000000	1239200000000	1379600000000	1294400000000	2153400000000	200600000000	194300000000	1315800000000	1067100000000	1136100000000
Collagen alpha-2(VI) chain	Q02788	2339600000000	789560000000	1674700000000	616750000000	3016500000000	2039900000000	1940500000000	326990000000	652790000000	720570000000
Short-chain specific acyl-CoA dehydrogenase, mitochondrial	Q07417	3155900000000	2592600000000	1847200000000	2184500000000	2208700000000	1974700000000	2104300000000	3969800000000	3.27E+08	3044900000000
Macrophage mannose receptor 1	Q2HZ94	918970000000	350070000000	461470000000	609820000000	1535300000000	107500000000	1074300000000	281180000000	395720000000	493370000000
NLR family member X1	Q3TL44	191820000000	550310000000		252870000000		9542000	212760000000	646140000000	496350000000	594350000000
Endoplasmic reticulum resident protein 44	Q9D1Q6	1709700000000	1223200000000	920910000000	1097200000000	1819400000000	2005800000000	2137800000000	867550000000	1117900000000	947530000000
Bile secretion
Solute carrier organic anion transporter family member 1B2	Q9JJL3	210370000	212660000	240960000	223980000	250230000	192470000	223480000	106910000	178220000	110710000
ATP-binding cassette sub-family G member 2	Q7TMS5	45649000	62272000	51896000	44734000	33549000	28604000	51000000		24748000	12724000
Scavenger receptor class B member 1	Q4FK30	50656000	28332000	23143000	32379000	53371000	42790000	72685000	17074000	28478000	18886000
Solute carrier family 22 member 1	O08966	56261000	33041000	29815000	23534000	48810000	44097000	45305000	16603000	21947000
Sodium/potassium-transporting ATPase subunit beta-1	Q545P0	284250000	250770000	279770000	275530000	258470000	236780000	322780000	137970000	198850000	188010000
Sodium/potassium-transporting ATPase subunit beta-3	Q544Q7	62385000	49584000	60808000	56128000	68625000	55777000	76586000	15429000	37609000	17500000
Aquaporin-1	Q02013	183540000	124600000	111740000	89637000	179570000	137320000	224310000	27462000	100570000	38363000
Solute carrier organic anion transporter family member 1A1	Q53ZW9	211830000	246580000	303160000	313040000	369730000	94015000	419650000	55724000	79063000
Sodium/potassium-transporting ATPase subunit alpha-1	Q8VDN2	1800900000	1314500000	1324300000	1327500000	1762300000	1518200000	1865300000	788640000	978970000	961220000
Epoxide hydrolase 1	Q9D379	3314700000	3196900000	3030400000	2689100000	2050800000	2117100000	4316300000	1481700000	1896500000	1386900000
PPAR signaling pathway
Long-chain specific acyl-CoA dehydrogenase, mitochondrial	P51174	577330000	301340000	258810000	312640000	535300000	463200000	367670000	701430000	581790000	683860000
Long-chain-fatty-acid--CoA ligase 1	D3Z041	3430000000	4263300000	3779300000	3737100000	2555200000	2276100000	3060100000	1764700000	2339800000	1820300000
Very long-chain acyl-CoA synthetase	O35488	1570000000	1310500000	1383100000	1363500000	1263600000	1608900000	1109300000	939700000	1172000000	760480000
Cytochrome P450 4A10	O88833	157570000	336600000	320200000	361750000	55145000	124280000	84751000	110460000	192380000	134410000
Fatty acid-binding protein, liver	Q3V2F7	1573100000	2030600000	2556200000	2748000000	1244300000	441220000	1868000000	565270000	484790000	644870000
Acyl-CoA-binding protein	Q548W7	201240000	194250000	201680000	152990000	72922000		91596000	159200000	142930000	206930000
Medium-chain specific acyl-CoA dehydrogenase, mitochondrial	P45952	443830000	299840000	316370000	281790000	308650000	313240000	223580000	632190000	470040000	570330000
Carnitine O-palmitoyltransferase 2, mitochondrial	P52825	1613400000	1459100000	1611100000	1418300000	1144700000	1058400000	1397400000	782380000	1081300000	820150000
Carnitine O-palmitoyltransferase 1, liver isoform	Q7TQD5	628040000	465580000	538260000	481190000	408520000	321270000	367330000	424300000	434540000	438610000
Platelet glycoprotein 4	Q3UAI3	139330000	167100000	149810000	131890000	71488000	101140000	169560000	58466000	80237000	74247000
Cytochrome P450 4A12A	Q91WL5	85311000	135400000	160650000	174780000	109760000	25990000	54877000		27904000
Enoyl-CoA hydratase	Q9DBM2	1639800000	1709400000	1599000000	1904000000	672010000	1447900000	717220000	2854100000	2240900000	2862000000
Phosphoenolpyruvate carboxykinase, cytosolic [GTP]	Q9Z2V4	259300000	208360000	170590000	214670000	132690000	146950000	226300000	507790000	234170000	499240000
Retinol metabolism
Cytochrome P450;Cytochrome P450 1A2	B6VGH4	241050000	337420000	312860000	248450000	308200000	161760000	278420000	80664000	144100000	92034000
Cytochrome P450 2B10	Q9WUD0	17573000	32180000	26033000	28977000	7442200			22572000	33245000	27062000
Cytochrome P450 4A10	O88833	157570000	336600000	320200000	361750000	55145000	124280000	84751000	110460000	192380000	134410000
Cytochrome P450 3A11	Q3UEN8	170640000	187610000	204280000	196030000	215430000	212090000	211950000	329300000	222790000	290520000
UDP-glucuronosyltransferase	Q3UEP4	651070000	664080000	787550000	761870000	898870000	630770000	651230000	282390000	499810000	230850000
Cytochrome P450 3A13	Q3UW87	38911000	24229000	55016000	32275000	80688000	147930000	45553000	127340000	110220000	76565000
UDP-glucuronosyltransferase 1-1	Q63886	915630000	894050000	923020000	946260000	952500000	1171200000	995010000	700230000	848960000	822720000
UDP-glucuronosyltransferase 1-6	Q64435	67732000	53516000	56018000	50985000	47369000	75636000	31332000	18958000	39201000	26473000
Cytochrome P450 2C54	Q6XVG2	132440000	143140000	136770000	91476000	212980000	172830000	155250000	111080000	135330000	74326000
UDP-glucuronosyltransferase 2A3	Q8BWQ1	429770000	575090000	572510000	562370000	570110000	538070000	390260000	223630000	331120000	277680000
UDP-glucuronosyltransferase	Q8K154	737710000	711930000	894120000	848400000	807390000	809440000	748520000	315940000	584290000	388690000
UDP-glucuronosyltransferase	Q8R084	1245100000	1244100000	1589100000	1562100000	919930000	715410000	1014100000	249540000	629780000	313300000
Cytochrome P450 2C70	Q91W64	317730000	144050000	165090000	161710000	261170000	318900000	183040000	93262000	145650000	90930000
Cytochrome P450 4A12A	Q91WL5	85311000	135400000	160650000	174780000	109760000	25990000	54877000		27904000
Dehydrogenase/reductase SDR family member 4	Q99LB2	622490000	554270000	577680000	419160000	502790000	406890000	397220000	303070000	329300000	320610000
Cytochromes
Cytochrome P450 2D26	Q8CIM7	513430000	519450000	502380000	482190000	654050000	714810000	639370000	522000000	412070000	412390000
Cytochrome P450 4V2	B2RSR0	54633000	81438000	70641000	72198000	61247000	40929000	48358000	28813000	44487000	19280000
Cytochrome P450 1A2	B6VGH4	241050000	337420000	312860000	248450000	308200000	161760000	278420000	80664000	144100000	92034000
Cytochrome P450 2B10	Q9WUD0	17573000	32180000	26033000	28977000	7442200			22572000	33245000	27062000
Cytochrome P450 4A10	O88833	157570000	336600000	320200000	361750000	55145000	124280000	84751000	110460000	192380000	134410000
Cytochrome P450 2D9	P11714	424670000	407960000	469720000	392970000	349210000	151220000	420250000	40971000	126210000	40713000
Cytochrome P450 2D10	P24456	433220000	339140000	448140000	386490000	445380000	419560000	266750000	135310000	215750000	231470000
Cytochrome P450 2F2	P33267	1275600000	1781500000	1613600000	1531000000	1449800000	1498600000	1366000000	883130000	1273300000	839980000
Cytochrome P450 3A11	Q3UEN8	170640000	187610000	204280000	196030000	215430000	212090000	211950000	329300000	222790000	290520000
Cytochrome P450 3A13	Q3UW87	38911000	24229000	55016000	32275000	80688000	147930000	45553000	127340000	110220000	76565000
Cytochrome P450 2C54	Q6XVG2	132440000	143140000	136770000	91476000	212980000	172830000	155250000	111080000	135330000	74326000
Cytochrome P450 2C70	Q91W64	317730000	144050000	165090000	161710000	261170000	318900000	183040000	93262000	145650000	90930000
Cytochrome P450 4A12A	Q91WL5	85311000	135400000	160650000	174780000	109760000	25990000	54877000		27904000
